# Supplementary material for: Proteomics Evidence of a Systemic Response to Desiccation in the Resurrection Plant Haberlea rhodopensis
Source: Int J Mol Sci. 2022 Jul 31;23(15):8520. doi: 10.3390/ijms23158520 (PMC9369045; doi:10.3390/ijms23158520)
Supplement: Supplementary file 1 [file ijms-23-08520-s001.zip › Supplementary tables.xlsx]

## Sheet: Table S1
spot 1	H7	20190411 -Haberlea
c48259_g1_i1 Mass: 36536 Score: 172 Expect: 1e-011 Matches: 11 Frame: 6
| Mn-superoxide dismutase [Haberlea rhodopensis]									multiple ID
Observed	Mr(expt)	Mr(calc)	ppm	Start		End	Miss	Ions	Peptide
1374.6510	1373.6437	1373.6476	-2.84	111	-	121	0	72	K.HHQAYVTNYNK.A
1774.9430	1773.9357	1773.9373	-0.91	161	-	178	1	75	K.NLAPVSEGGGEPPKGPLR.A
2644.2422	2643.2349	2643.2414	-2.46	83	-	105	0	7	K.YTLPDLPYDYDALEPAISGDIMR.L + Oxidation (M)
spot 2	E8	20170523 -Petko
Chlorophyll a-b binding protein 40 [Morus notabilis]
c65783_g1_i1 Mass: 39305 Score: 177 Expect: 4.6e-012 Matches: 18 Frame: 4
Observed	Mr(expt)	Mr(calc)	ppm	Start		End	Miss	Ions	Peptide
1015.5143	1014.5071	1014.4811	25.6	157	-	164	0	3	K.FGEAVWFK.A + Dioxidation (W)
1252.6902	1251.6829	1251.6683	11.6	126	-	135	1	46	K.NRELEVIHSR.W
1414.6451	1413.6379	1413.6161	15.4	74	-	86	0	40	R.TTSSGSPWYGPDR.V + Trp->Kynurenin (W)
1442.6344	1441.6271	1441.6110	11.2	74	-	86	0	(21)	R.TTSSGSPWYGPDR.V + Dioxidation (W)
1554.8010	1553.7938	1553.7766	11.1	89	-	102	0	76	R.YLGPFSGEPPSYLK.G
spot 3	E3	20190411 -NCBI-VP
XP_017975287.1 Mass: 25776 Score: 122 Expect: 4.7e-006 Matches: 4
PREDICTED: stem-specific protein TSJT1 isoform X2 [Theobroma cacao]
Observed	Mr(expt)	Mr(calc)	ppm	Start		End	Miss	Ions	Peptide
2088.0300	2087.0228	2087.0146	3.90	182	-	200	0	115	K.SLASFPQGCFFSTAIGELR.S
spot 4	D3	20190411 -NCBI-VP
XP_007034633.1 Mass: 25577 Score: 148 Expect: 1.2e-008 Matches: 2
PREDICTED: stem-specific protein TSJT1 isoform X1 [Theobroma cacao]									multiple ID
Observed	Mr(expt)	Mr(calc)	ppm	Start		End	Miss	Ions	Peptide
2088.0303	2087.0230	2087.0146	4.01	182	-	200	0	148	K.SLASFPQGCFFSTAIGELR.S
spot 5	G16	20170523 -Haberlea
c15197_g1_i1 Mass: 60907 Score: 182 Expect: 1.4e-012 Matches: 16 Frame: 5									multiple ID
c15197_g1_i1 | RecName: Full=Oxygen-evolving enhancer protein 1, chloroplastic; Short=OEE1; AltName: Full=33 kDa subunit of oxygen evolving system of photosystem II; AltName: Full
Observed	Mr(expt)	Mr(calc)	ppm	Start		End	Miss	Ions	Peptide
1252.6610	1251.6537	1251.6459	6.27	222	-	231	1	5	K.RLTYDEIQSK.T
1544.7482	1543.7409	1543.7307	6.60	355	-	368	0	70	K.ADGFSGEFLVPSYR.G
1578.7856	1577.7784	1577.7798	-0.90	379	-	395	0	46	R.GGSTGYDNAVALLAGGR.G
1760.8820	1759.8747	1759.8741	0.34	323	-	339	0	46	K.DGIDYAAVTVQLPGGER.V
2991.4497	2990.4424	2990.4581	-5.23	379	-	407	2	1	R.GGSTGYDNAVALLAGGRGDEEELQKENIK.N
spot 6	G5	20190411 -Haberlea
c64068_g1_i1 Mass: 63740 Score: 178 Expect: 2.5e-012 Matches: 8 Frame: 5
SNF1-related protein kinase regulatory subunit gamma-like PV42a									multiple ID
Observed	Mr(expt)	Mr(calc)	ppm	Start		End	Miss	Ions	Peptide
1832.9128	1831.9056	1831.9064	-0.47	31	-	46	0	88	R.IDQISPEFQNVASTQR.L
2678.3652	2677.3580	2677.3599	-0.72	189	-	213	0	84	R.ALVPVDSNIENVAGVELVESAFSYR.M
spot 7	A06	20190411 -NCBI-VP
YP_009532450.1 Mass: 53756 Score: 709 Expect: 9.4e-065 Matches: 30
ATP synthase CF1 beta subunit (chloroplast) [Echinacanthus longipes]									multiple ID
Observed	Mr(expt)	Mr(calc)	ppm	Start		End	Miss	Ions	Peptide
1328.6528	1327.6456	1327.6633	-13.39	192	-	205	0	106	K.AHGGVSVFGGVGER.T
1431.6780	1430.6707	1430.6790	-5.79	379	-	390	0	75	R.IVGEEHYETAQR.V
1487.7402	1486.7330	1486.8429	-73.92	179	-	191	0	36	K.TVLIMELINNIAK.A + Oxidation (M)
1617.7894	1616.7822	1616.7981	-9.84	232	-	246	0	42	K.VALVYGQMNEPPGAR.M + Oxidation (M)
1774.8981	1773.8908	1773.9585	-38.15	2	-	18	2	7	M.RINPTTSGSGVSTIEKK.N
1955.0342	1954.0269	1954.0160	5.58	110	-	127	0	82	R.IFNVLGEPVDNLGPVDTR.T
2113.0945	2112.0872	2112.0885	-0.63	88	-	109	0	127	R.GMEVIDTGAPLSVPVGGATLGR.I + Oxidation (M)
2355.1785	2354.1712	2354.1649	2.69	53	-	73	0	125	R.DTVGQPINVTCEVQQLLGNNR.V
spot 8	F06	20190411 -NCBI-VP
YP_009272498.1 Mass: 55576 Score: 259 Expect: 9.4e-020 Matches: 17
ATP synthase CF1 alpha subunit (chloroplast) [Utricularia reniformis]									multiple ID
Observed	Mr(expt)	Mr(calc)	ppm	Start		End	Miss	Ions	Peptide
1252.6907	1251.6834	1251.7187	-28.17	129	-	140	0	41	R.LIESPAPGIISR.R
1501.7987	1500.7914	1500.7896	1.21	203	-	216	0	43	K.ASSVAQVVNTLQER.G
1553.7410	1552.7337	1552.7310	1.71	285	-	297	0	56	R.EAYPGDVFYLHSR.L
1612.9010	1611.8937	1611.8944	-0.44	26	-	41	0	84	K.IVNTGTVLQVGDGIAR.I
spot 9	B6	20190411 -Haberlea
c68827_g1_i2 Mass: 84944 Score: 258 Expect: 2.5e-020 Matches: 17 Frame: 6
Mitochondrial-processing peptidase subunit alpha									multiple ID
Observed	Mr(expt)	Mr(calc)	ppm	Start		End	Miss	Ions	Peptide
1867.9790	1866.9717	1866.9687	1.61	451	-	468	0	131	K.ELVAVATPGEVDGVQLDR.A
2028.9949	2027.9876	2027.9800	3.76	288	-	305	0	100	R.LNSSVLEEFVAENYTASR.M
spot 10	E06	20190411 -Haberlea
c57866_g1_i2 Mass: 76068 Score: 337 Expect: 3.2e-028 Matches: 30 Frame: 3
polyphenol oxidase [Sesamum indicum]									multiple ID
Observed	Mr(expt)	Mr(calc)	ppm	Start		End	Miss	Ions	Peptide
1021.5923	1020.5850	1020.5968	-11.51	549	-	556	1	23	R.LKLTDLYR.D
1195.6702	1194.6629	1194.6721	-7.68	574	-	585	1	84	R.HKGEGVTIGGIK.I
1239.5874	1238.5801	1238.5760	3.31	222	-	229	0	14	R.WYLYFYER.I
1406.7006	1405.6933	1405.6990	-4.06	525	-	537	0	63	K.ASYAGTYAQIPHK.T
1560.6775	1559.6702	1559.6675	1.76	309	-	322	0	28	R.GNSTATDFMGQPYR.T + Oxidation (M)
1917.9304	1916.9231	1916.9037	10.1	557	-	573	0	64	R.DMDVADDDEVLVTLVPR.H + Oxidation (M)
spot 11	C18	20170523-Haberlea
Contig_042022 Mass: 47356 Score: 179 Expect: 2.9e-012 Matches: 15 Frame: 1
Contig_042022 | ribulose- -bisphosphate carboxylase oxygenase large subunit
Observed	Mr(expt)	Mr(calc)	ppm	Start		End	Miss	Ions	Peptide
1261.5966	1260.5893	1260.6213	-25.37	286	-	295	0	14	R.FLFCAEAIYK.A
1407.5469	1406.5396	1406.6605	-85.97	90	-	100	0	40	K.LTYYTPEYETK.D
1465.6268	1464.6196	1464.7474	-87.26	215	-	227	0	67	K.TFQGPPHGIQVER.D
1502.7244	1501.7171	1501.8439	-84.42	233	-	245	0	11	K.YGRPLLGCTIKPK.L
spot 12	B6	20170526 -Petko
c15197_g1_i1 Mass: 60907 Score: 95 Expect: 0.00078 Matches: 13 Frame: 5
Full=Oxygen-evolving enhancer protein 1, chloroplastic; Short=OEE1; AltName: Full=33 kDa subunit of oxygen evolving system of photosystem II
Observed	Mr(expt)	Mr(calc)	ppm	Start		End	Miss	Ions	Peptide
1252.6644	1251.6572	1251.6459	9.00	222	-	231	1	22	K.RLTYDEIQSK.T
1544.7372	1543.7299	1543.7307	-0.52	355	-	368	0	57	K.ADGFSGEFLVPSYR.G
spot 13	F6	20190411 -Petko
c69429_g1_i3 Mass: 196072 Score: 178 Expect: 2.5e-012 Matches: 30 Frame: 3
Kunitz-type trypsin inhibitor B3
Observed	Mr(expt)	Mr(calc)	ppm	Start		End	Miss	Ions	Peptide
1096.5265	1095.5192	1095.5196	-0.37	152	-	160	1	39	R.VEYDESAKR.D
1787.9017	1786.8945	1786.8890	3.05	215	-	230	0	119	R.LSLGESNFPSSTFVFR.K
spot 14	C9	20170523 -Petko
c93194_g1_i1 Mass: 18122 Score: 376 Expect: 5.8e-032 Matches: 10 Frame: 2
PREDICTED: quinone oxidoreductase-like protein At1g23740, chloroplastic-like [Solanum tuberosum]
Observed	Mr(expt)	Mr(calc)	ppm	Start		End	Miss	Ions	Peptide
1157.6066	1156.5993	1156.5876	10.1	33	-	42	0	58	K.HLNPYLESGK.V
1256.6622	1255.6550	1255.6449	8.05	22	-	32	0	62	R.FVVTSNGEYLK.H
1442.6975	1441.6902	1441.6837	4.51	58	-	69	0	39	K.VNEAFSYLETNR.A
1742.9485	1741.9412	1741.9363	2.81	4	-	21	0	94	K.EGGSVVVLTGAVTPPGFR.F
2231.0772	2230.0699	2230.0695	0.18	51	-	69	1	113	K.GPFPFDKVNEAFSYLETNR.A
spot 15	E18	20170526 - Petko
Contig_003127 Mass: 47480 Score: 177 Expect: 4.6e-012 Matches: 23 Frame: 2
Contig_003127 | phosphoglycerate kinase
Observed	Mr(expt)	Mr(calc)	ppm	Start		End	Miss	Ions	Peptide
1015.5914	1014.5841	1014.5862	-2.07	177	-	185	0	39	K.YSLAPLVPR.L
1102.6267	1101.6194	1101.6295	-9.11	294	-	304	0	23	K.RPFAAIVGGSK.V
1206.7209	1205.7137	1205.7244	-8.92	161	-	171	0	38	K.VILSSHLGRPK.G
1377.7082	1376.7010	1376.7187	-12.90	281	-	293	0	15	K.ELDYLVGAVSSPK.R
1903.9418	1902.9345	1902.9588	-12.78	240	-	257	0	7	K.LASVADLFVNDAFGTAHR.A
2028.9382	2027.9310	2027.9396	-4.26	126	-	143	0	34	R.ADLNVPLDDNQNITDDTR.I
spot 16	B17	20170526 -Petko
Contig_003769 Mass: 19185 Score: 150 Expect: 2.3e-009 Matches: 13 Frame: 4
proteasome subunit alpha
Observed	Mr(expt)	Mr(calc)	ppm	Start		End	Miss	Ions	Peptide
1085.5453	1084.5380	1084.5301	7.28	42	-	49	1	27	R.KQAEQYYR.L
1182.6853	1181.6780	1181.6768	1.02	53	-	62	0	12	K.EQIPVTQLVR.E
1556.9000	1555.8927	1555.8821	6.83	1	-	14	1	45	-.KLPSILVDETSVQK.I
1586.9309	1585.9236	1585.9192	2.82	50	-	62	1	40	R.LYKEQIPVTQLVR.E
spot 17	C8	20170523 -Petko
c67225_g2_i1 Mass: 44833 Score: 331 Expect: 1.8e-027 Matches: 23 Frame: 3
unnamed protein product [Coffea canephora]
Observed	Mr(expt)	Mr(calc)	ppm	Start		End	Miss	Ions	Peptide
1149.6406	1148.6334	1148.6190	12.5	130	-	139	0	31	K.YTSLKPLGDR.V
1180.6278	1179.6205	1179.6136	5.92	249	-	260	0	53	K.TAGGLFLTDASK.E
1438.8117	1437.8044	1437.7940	7.23	261	-	275	0	101	K.EKPSIGTVAAVGPGR.L
2022.9174	2021.9101	2021.9079	1.09	298	-	315	1	6	K.YTGNDYRGSDGSDYIALR.A
2390.2073	2389.2000	2389.2125	-5.24	276	-	297	1	14	R.LDDDGDRKPLSVTPGNTVLYSK.Y
2610.3914	2609.3841	2609.4025	-7.04	151	-	177	0	100	K.TSGGILLPTTSLSKPQGGEVVAVGEGR.T
spot 18	D8	20170526 -Petko
c62633_g1_i1 Mass: 151513 Score: 222 Expect: 1.4e-016 Matches: 34 Frame: 2
c62633_g1_i1 | rbcL gene product (chloroplast) [Boea hygrometrica]
Observed	Mr(expt)	Mr(calc)	ppm	Start		End	Miss	Ions	Peptide
1021.5417	1020.5344	1020.5240	10.2	553	-	561	0	42	K.DTDILAAFR.V
1187.6656	1186.6584	1186.6571	1.10	806	-	815	0	43	R.DNGLLLHIHR.A
1465.7532	1464.7459	1464.7474	-1.01	667	-	679	0	53	K.TFQGPPHGIQVER.D
1598.8248	1597.8176	1597.8172	0.23	952	-	966	1	24	R.NEGRDLAAEGNAIIR.E
2410.1787	2409.1714	2409.1740	-1.06	542	-	561	1	23	K.LTYYTPEYETKDTDILAAFR.V
spot 19	F17	20170526 -Petko
Contig_000632 Mass: 21817 Score: 100 Expect: 0.00023 Matches: 12 Frame: 4
Contig_000632 | nad-dependent epimerase dehydratase									multiple ID
Observed	Mr(expt)	Mr(calc)	ppm	Start		End	Miss	Ions	Peptide
1169.6251	1168.6178	1168.6241	-5.33	131	-	140	1	43	K.ALFSQVTTRF.-
1858.9541	1857.9468	1857.9684	-11.59	73	-	88	1	43	R.ELLVGKDDELLQTETR.T
spot 20	B14	20190411 -Haberlea
c60859_g2_i1 Mass: 41749 Score: 131 Expect: 1.3e-007 Matches: 3 Frame: 1
| dehydrin-like protein Dh2 [Paraboea crassifolia]
Observed	Mr(expt)	Mr(calc)	ppm	Start		End	Miss	Ions	Peptide
2131.9800	2130.9727	2130.9719	0.38	140	-	160	0	131	K.GSQPHPEAGYGGVAGQPEHEK.K
spot 21	E15	20190411 -Haberlea
c15302_g1_i1 Mass: 75140 Score: 117 Expect: 3.2e-006 Matches: 14 Frame: 5
| _
Observed	Mr(expt)	Mr(calc)	ppm	Start		End	Miss	Ions	Peptide
1544.7399	1543.7326	1543.7307	1.22	355	-	368	0	78	K.ADGFSGEFLVPSYR.G
1578.7897	1577.7824	1577.7798	1.65	379	-	395	0	20	R.GGSTGYDNAVALLAGGR.G
1760.8882	1759.8809	1759.8741	3.88	323	-	339	0	10	K.DGIDYAAVTVQLPGGER.V
spot 22	E16	20190411 -Haberlea
c42573_g1_i1 Mass: 64003 Score: 86 Expect: 0.0042 Matches: 12 Frame: 2
| hypothetical protein MIMGU_mgv1a022832mg [Erythranthe guttata]
Observed	Mr(expt)	Mr(calc)	ppm	Start		End	Miss	Ions	Peptide
1612.7983	1611.7911	1611.8039	-7.94	141	-	154	0	29	K.ARPNIPIQMGDEQK.M + Oxidation (M)
1932.9402	1931.9329	1931.9337	-0.40	372	-	389	1	45	R.SKFQGGGEAENEGELRPK.E
spot 23	F16	20190411 -Haberlea
c42573_g1_i1 Mass: 64003 Score: 94 Expect: 0.00068 Matches: 14 Frame: 2
| hypothetical protein MIMGU_mgv1a022832mg [Erythranthe guttata]
Observed	Mr(expt)	Mr(calc)	ppm	Start		End	Miss	Ions	Peptide
1612.7966	1611.7894	1611.8039	-9.00	141	-	154	0	36	K.ARPNIPIQMGDEQK.M + Oxidation (M)
1740.8942	1739.8869	1739.8842	1.54	200	-	215	0	11	K.IRPGEAPVPPSNYESK.V
1932.9493	1931.9421	1931.9337	4.34	372	-	389	1	33	R.SKFQGGGEAENEGELRPK.E
spot 24	G16	20190411 -Haberlea
c42573_g1_i1 Mass: 64003 Score: 176 Expect: 4e-012 Matches: 18 Frame: 2
| hypothetical protein MIMGU_mgv1a022832mg [Erythranthe guttata]
Observed	Mr(expt)	Mr(calc)	ppm	Start		End	Miss	Ions	Peptide
1612.8075	1611.8002	1611.8039	-2.26	141	-	154	0	20	K.ARPNIPIQMGDEQK.M + Oxidation (M)
1717.8262	1716.8189	1716.8067	7.10	374	-	389	0	21	K.FQGGGEAENEGELRPK.E
1740.8909	1739.8836	1739.8842	-0.36	200	-	215	0	12	K.IRPGEAPVPPSNYESK.V
1921.0013	1919.9941	1919.9953	-0.62	216	-	234	1	37	K.VPDPTGDGGKEAEVAPLIR.R
1932.9407	1931.9334	1931.9337	-0.15	372	-	389	1	59	R.SKFQGGGEAENEGELRPK.E
spot 25	D05	20190411 -Haberlea
c65783_g1_i4 Mass: 43109 Score: 273 Expect: 8e-022 Matches: 21 Frame: 4
| Chlorophyll a-b binding protein 40 [Morus notabilis									multiple ID
Observed	Mr(expt)	Mr(calc)	ppm	Start		End	Miss	Ions	Peptide
1252.6793	1251.6720	1251.6683	2.95	126	-	135	1	52	K.NRELEVIHSR.W
1410.6450	1409.6377	1409.6212	11.8	74	-	86	0	91	R.TTSSGSPWYGPDR.V
1426.6334	1425.6261	1425.6161	7.05	74	-	86	0	(61)	R.TTSSGSPWYGPDR.V + Oxidation (HW)
1442.6281	1441.6208	1441.6110	6.79	74	-	86	0	(17)	R.TTSSGSPWYGPDR.V + Dioxidation (W)
1554.7838	1553.7765	1553.7766	-0.03	89	-	102	0	93	R.YLGPFSGEPPSYLK.G
spot 26
c57866_g1_i1 Mass: 81384 Score: 453 Expect: 1.1e-039 Matches: 34 Frame: 2
c57866_g1_i1 | polyphenol oxidase [Sesamum indicum]
Observed	Mr(expt)	Mr(calc)	ppm	Start		End	Miss	Ions	Peptide
970.5264	969.5191	969.5171	2.08	169	-	176	0	---	K.ASLEYIFK.Y
997.5026	996.4953	996.4988	-3.53	186	-	193	1	---	K.RLPEDDPR.S
1163.6467	1162.6394	1162.6459	-5.55	586	-	597	0	---	R.HQGPGVTIGGIK.I
1163.6467	1162.6395	1162.6459	-5.52	586	-	597	0	74	R.HQGPGVTIGGIK.I
1327.6095	1326.6022	1326.6164	-10.69	335	-	348	0	---	R.TGDAVNPGPGASER.G
1327.6095	1326.6022	1326.6164	-10.69	335	-	348	0	61	R.TGDAVNPGPGASER.G
1354.8174	1353.8101	1353.8132	-2.31	149	-	159	1	46	K.IIDYRIPPVIR.T
1354.8174	1353.8101	1353.8132	-2.30	149	-	159	1	---	K.IIDYRIPPVIR.T
1432.7507	1431.7434	1431.7510	-5.31	537	-	549	0	---	K.AAYIGTYAQIPHK.T
1460.7494	1459.7421	1459.7532	-7.58	349	-	362	0	55	R.GSHTSIHALIGDPR.E
1460.7494	1459.7421	1459.7532	-7.57	349	-	362	0	---	R.GSHTSIHALIGDPR.E
1560.6724	1559.6651	1559.6675	-1.53	321	-	334	0	34	R.GNSTATDFMGQPYR.T + Oxidation (M)
1560.6724	1559.6651	1559.6675	-1.50	321	-	334	0	---	R.GNSTATDFMGQPYR.T + Oxidation (M)
1572.6836	1571.6763	1571.8308	-98.25	477	-	490	0	---	K.ADTAFPINLDQIVR.V
1572.8145	1571.8072	1571.8308	-14.97	477	-	490	0	---	K.ADTAFPINLDQIVR.V
1597.7131	1596.7058	1596.7168	-6.89	363	-	377	0	---	R.EPSGENLGNFYSAGR.D
1597.7131	1596.7059	1596.7168	-6.87	363	-	377	0	---	R.EPSGENLGNFYSAGR.D
1722.8157	1721.8084	1721.8236	-8.80	391	-	403	0	---	R.MWTLWQFFLPSSR.V + Oxidation (M); 2 Trp->Kynurenin (W)
1758.0092	1757.0019	1756.9458	31.9	501	-	516	0	---	K.ADELLVIENIVVDTSK.L
1803.9196	1802.9123	1802.9203	-4.40	169	-	183	1	---	K.ASLEYIFKYNTAIDR.M
1872.9875	1871.9802	1871.9893	-4.87	537	-	553	1	---	K.AAYIGTYAQIPHKTPNK.T
1914.0031	1912.9958	1913.0047	-4.63	449	-	464	0	---	R.IDLPWLDYRPPPQTAK.A + Trp->Kynurenin (W)
1925.9803	1924.9730	1925.0047	-16.45	449	-	464	0	---	R.IDLPWLDYRPPPQTAK.A + Oxidation (HW)
1929.0752	1928.0679	1928.0843	-8.51	586	-	604	1	---	R.HQGPGVTIGGIKIIENPAK.A
1929.0752	1928.0679	1928.0843	-8.51	586	-	604	1	53	R.HQGPGVTIGGIKIIENPAK.A
1942.8973	1941.8900	1941.8601	15.4	264	-	281	0	---	K.GMAVPGMFNDPNSAIFDK.K + 2 Oxidation (M)
1942.8973	1941.8901	1941.8601	15.4	264	-	281	0	1	K.GMAVPGMFNDPNSAIFDK.K + 2 Oxidation (M)
2185.9734	2184.9661	2185.0667	-46.01	391	-	407	1	---	R.MWTLWQFFLPSSRVPDK.K + Dioxidation (W); Oxidation (HW)
2211.1050	2210.0977	2210.0612	16.5	264	-	283	2	---	K.GMAVPGMFNDPNSAIFDKKR.N + Oxidation (M)
2227.0784	2226.0711	2226.0562	6.73	264	-	283	2	---	K.GMAVPGMFNDPNSAIFDKKR.N + 2 Oxidation (M)
2244.1423	2243.1350	2243.1546	-8.73	470	-	490	1	---	R.AGTQADKADTAFPINLDQIVR.V
2244.1423	2243.1351	2243.1546	-8.71	470	-	490	1	104	R.AGTQADKADTAFPINLDQIVR.V
2574.2292	2573.2219	2573.2438	-8.51	409	-	430	0	---	K.ITDPDFLNASFVFYDENAQLVR.V
2668.2385	2667.2312	2667.2473	-6.04	563	-	585	0	---	R.LTDVYEDMDVTDDDEVLVTLVPR.H + Oxidation (M)

## Sheet: Table S2
Dhn 1 Control
Protein Set	Description	Score	Peptides	Spectral Count	Specific Spectral Count	Sequence Count
cds.c60859_g2_i1|m.31240	cds.c60859_g2_i1|m.31240 c60859_g2_i1|g.31240 ORF c60859_g2_i1|g.31240 c60859_g2_i1|m.31240 type:complete len:128 (+) c60859_g2_i1:145-528(+)	300.76	4	16	16	4
Peptide	PTM	Score	Calc. Mass	Exp. MoZ	Ppm	Protein Set Count	Protein Sets
AEYGGNKYGTEGK	Acetyl (Protein N-term)	94.02	1414.64	708.326	0.4	1	cds.c60859_g2_i1|m.31240
GSQPHPEAGYGGVAGQPEHEK		82.45	2130.97	711.331	0.28	1	cds.c60859_g2_i1|m.31240
QTDEYGNPVHHPTAGGHTGAPGAEHQHGAPFATGPTTGAPVHR		80.99	4319	1080.76	0.15	1	cds.c60859_g2_i1|m.31240
GSQPHPEAGYGGVAGQPEHEKK		43.3	2259.07	754.029	-0.05	1	cds.c60859_g2_i1|m.31240
Dhn 2control
Protein Set	Description	Score	Peptides	Spectral Count	Specific Spectral Count	Sequence Count
cds.c60859_g2_i1|m.31240	cds.c60859_g2_i1|m.31240 c60859_g2_i1|g.31240 ORF c60859_g2_i1|g.31240 c60859_g2_i1|m.31240 type:complete len:128 (+) c60859_g2_i1:145-528(+)	165.93	2	11	11	2
Peptide	PTM	Score	Calc. Mass	Exp. MoZ	Ppm	Protein Set Count	Protein Sets
AEYGGNKYGTEGK	Acetyl (Protein N-term)	38.79	1414.64	708.326	0.86	1	cds.c60859_g2_i1|m.31240
GSQPHPEAGYGGVAGQPEHEK		28.35	2130.97	711.332	1.53	1	cds.c60859_g2_i1|m.31240
Dhn 1 Dry
Protein Set	Description	Score	Peptides	Spectral Count	Specific Spectral Count	Sequence Count
cds.c60859_g2_i1|m.31240	cds.c60859_g2_i1|m.31240 c60859_g2_i1|g.31240 ORF c60859_g2_i1|g.31240 c60859_g2_i1|m.31240 type:complete len:128 (+) c60859_g2_i1:145-528(+)	226.81	3	22	22	3
Peptide	PTM	Score	Calc. Mass	Exp. MoZ	Ppm	Protein Set Count	Protein Sets
AEYGGNKYGTEGK	Acetyl (Protein N-term)	93.33	1414.64	708.325	-0.14	1	cds.c60859_g2_i1|m.31240
GSQPHPEAGYGGVAGQPEHEK		79.65	2130.97	711.331	0.11	1	cds.c60859_g2_i1|m.31240
GSQPHPEAGYGGVAGQPEHEKK		53.83	2259.07	754.03	0.8	1	cds.c60859_g2_i1|m.31240
Dhn 2 Dry
Protein Set	Description	Score	Peptides	Spectral Count	Specific Spectral Count	Sequence Count
cds.c60859_g2_i1|m.31240	cds.c60859_g2_i1|m.31240 c60859_g2_i1|g.31240 ORF c60859_g2_i1|g.31240 c60859_g2_i1|m.31240 type:complete len:128 (+) c60859_g2_i1:145-528(+)	174.98	2	3	3	2
Peptide	PTM	Score	Calc. Mass	Exp. MoZ	Ppm	Protein Set Count	Protein Sets
IVIELYPGDVPK		43.92	1341.75	671.885	0.8	1	cds.c60859_g1_i1|m.31238
AEYGGNKYGTEGK	Acetyl (Protein N-term)	90.25	1414.64	708.326	0.4	1	cds.c60859_g2_i1|m.31240
GSQPHPEAGYGGVAGQPEHEK		84.73	2130.97	711.332	0.62	1	cds.c60859_g2_i1|m.31240

## Sheet: Table S3
										Normalized abundance						Raw abundance						Spectral counts
										Ctrl			Mutant			Ctrl			Mutant			Ctrl			Mutant			Tags
Unique peptides	Confidence score	Anova (p)	q Value	Max fold change	Power	Highest mean condition	Lowest mean condition	Mass	Description	Petko_Hab.Ctrl1	Petko_Hab.Ctrl2	Petko_Hab.Ctrl3	Petko_Hab.Dz1	Petko_Hab.Dz2	Petko_Hab.Dz3	Petko_Hab.Ctrl1	Petko_Hab.Ctrl2	Petko_Hab.Ctrl3	Petko_Hab.Dz1	Petko_Hab.Dz2	Petko_Hab.Dz3	Petko_Hab.Ctrl1	Petko_Hab.Ctrl2	Petko_Hab.Ctrl3	Petko_Hab.Dz1	Petko_Hab.Dz2	Petko_Hab.Dz3	Anova p-value <= 0.05	Max fold change >= 2	Max fold change >= 1.5	At least 1 unique sequence	At least 2 unique sequences	At least 2 sequences per protein	High abundance in ctrl	High abundance in Mutant
2	154.85	0.16167	0.374545	1.22389	0.262557	Ctrl	Mutant	33358	| PREDICTED: ripening-related protein grip22-like [Vitis vinifera]	608.242	818.732	599.408	606.393	535.428	513.868	995.349	356.929	1057.28	606.393	699.107	405.188	1	1	2	2	3	1				x	x	x	x
2	233.17	0.927726	0.672389	1.00143	0.0506622	Ctrl	Mutant	83703	| _	496.318	734.906	534.76	509.722	443.053	810.688	812.194	320.385	943.247	509.722	578.493	639.232	2	0	0	0	0	0				x	x	x	x
1	93.63	0.0700336	0.245565	1.68077	0.464364	Ctrl	Mutant	36757	| hypothetical protein MIMGU_mgv1a013253mg [Erythranthe guttata]	204.023	149.655	197.286	138.487	118.06	71.2572	333.87	65.2427	347.987	138.487	154.15	56.1867	0	0	1	0	0	0			x	x		x	x
7	320.16	7.32005e-06	0.0026538	2.21664	1	Ctrl	Mutant	114496	| cytochrome b559 component psbE - beet PSII cytochome b559 alpha chain [Beta vulgaris subsp. vulgaris]	4894.29	5300.9	4993.98	2301.68	2317.12	2233.56	8009.2	2310.95	8808.74	2301.68	3025.45	1761.17	6	6	6	5	4	3	x	x	x	x	x	x	x
2	79.59	0.8214	0.654153	1.04664	0.0541311	Ctrl	Mutant	35670	| _	294.163	425.484	280.349	301.121	256.191	398.118	481.378	185.491	494.499	301.121	334.508	313.918	2	1	0	0	0	0				x	x	x	x
1	364.07	0.000813172	0.0198855	1.89116	0.999994	Ctrl	Mutant	26515	| _	722.762	643.529	678.317	318.834	392.733	369.573	1182.76	280.549	1196.46	318.834	512.791	291.411	0	0	0	1	0	0	x		x	x		x	x
1	182.8	0.807388	0.651748	1.12541	0.0548249	Ctrl	Mutant	10988	| _	847.547	1565.07	700.71	1062.35	719.706	984.352	1386.96	682.3	1235.96	1062.35	939.718	776.167	0	0	1	1	1	1				x		x	x
2	191.93	0.65858	0.61176	1.15578	0.0662089	Ctrl	Mutant	46667	| hypothetical protein MIMGU_mgv1a008862mg [Erythranthe guttata]	352.769	277.26	564.444	331.597	405.564	296.319	577.284	120.872	995.605	331.597	529.544	233.649	1	0	0	0	2	1				x	x	x	x
6	282.58	0.460397	0.552654	1.376	0.097884	Ctrl	Mutant	21450	| _	19328.5	46206.5	21232.6	16476.5	14346.1	32235.4	31629.9	20143.9	37451.5	16476.5	18731.7	25417.8	8	6	7	6	4	6				x	x	x	x
1	126.2	0.000213172	0.0102843	248.366	1	Ctrl	Mutant	156015	| _	93.4888	39.365	44.7042	0.714905	0	0	152.989	17.1613	78.8523	0.714905	0	0	1	0	0	0	0	0	x	x	x	x		x	x
1	55.62	0.314885	0.490396	1.12148	0.145514	Ctrl	Mutant	13814	| _	469.89	642.885	546.41	486.7	478.323	514.443	768.945	280.268	963.795	486.7	624.545	405.642	0	1	0	0	0	0				x		x	x
1	35.79	0.546584	0.576584	1.0652	0.0810151	Ctrl	Mutant	18454	| psi14B protein [Solanum putative phosphatase [Solanum lycopersicum]	180.711	231.606	178.67	182.712	185.914	186.191	295.723	100.97	315.151	182.712	242.747	146.813	1	1	1	1	1	0				x		x	x
2	223.72	0.00825115	0.0813127	1.53649	0.945412	Ctrl	Mutant	33111	| hypothetical protein MIMGU_mgv1a015367mg [Erythranthe guttata]	779.554	929.647	711.888	490.826	560.962	523.939	1275.69	405.283	1255.68	490.826	732.446	413.129	2	2	2	0	0	0	x		x	x	x	x	x
1	102.54	0.507392	0.558892	20.2355	0.0879628	Ctrl	Mutant	60393	| hypothetical protein MIMGU_mgv1a012826mg [Erythranthe guttata]	0	0	21.0899	0.376028	0	0.666196	0	0	37.1999	0.376028	0	0.525299	0	0	1	0	0	0		x	x	x		x	x
3	103.47	0.0491681	0.193631	1.41798	0.561541	Ctrl	Mutant	34753	| hypothetical protein MIMGU_mgv1a014635mg [Erythranthe guttata]	1270.57	1626.46	1090.77	897.813	919.37	995.122	2079.22	709.061	1923.97	897.813	1200.42	784.66	0	0	2	1	0	0	x			x	x	x	x
2	31.69	0.000218065	0.0102843	1.78656	1	Ctrl	Mutant	36045	| hypothetical protein PRUPE_ppa011164mg [Prunus persica]	899.139	780.664	801.568	458.951	454.789	475.172	1471.38	340.333	1413.86	458.951	593.817	374.676	2	0	2	0	0	0	x		x	x	x	x	x
3	82.64	0.832999	0.655642	1.02767	0.0536003	Ctrl	Mutant	16391	| hypothetical protein [Plantago major]	1145.23	1564.73	1338.64	994.641	1408.28	1536.65	1874.1	682.148	2361.18	994.641	1838.79	1211.66	2	1	3	2	1	2				x	x	x	x
1	69.5	0.0179687	0.118641	1.93855	0.820897	Ctrl	Mutant	19864	| 14-3-3 h-1 protein [Genlisea aurea]	375.593	409.117	279.937	159.565	157.146	232.486	614.635	178.356	493.773	159.565	205.185	183.317	1	0	0	0	0	0	x		x	x		x	x
8	1764	0.609768	0.599462	1.12997	0.0718591	Ctrl	Mutant	75140	| _	15214.9	25113	15322.8	16568	14906.9	17774.9	24898.2	10948.1	27027.4	16568	19463.9	14015.6	7	5	7	4	5	8				x	x	x	x
1	71.06	0.0828064	0.266704	1.4774	0.420016	Ctrl	Mutant	73694	| _	393.261	605.911	408.312	325.109	266.631	360.936	643.548	264.149	720.209	325.109	348.139	284.6	2	1	1	1	0	1				x		x	x
2	105.76	0.0356307	0.173537	1.63818	0.650644	Ctrl	Mutant	44483	| Ribosome recycling factor isoform 1 [Theobroma cacao]	577.227	735.224	568.978	358.458	302.593	487.434	944.596	320.524	1003.6	358.458	395.095	384.345	2	1	0	0	1	1	x		x	x	x	x	x
2	138.98	0.024044	0.137404	2.49909	0.753516	Ctrl	Mutant	31184	| stress-induced protein 20 [Capsicum annuum]	6302.31	9543.05	4643.01	2928.95	2035.35	3234.02	10313.3	4160.33	8189.67	2928.95	2657.56	2550.04	3	2	2	1	1	2	x	x	x	x	x	x	x
5	683.8	0.96093	0.683695	1.02534	0.050193	Ctrl	Mutant	57442	| _	21157.7	36699.7	19353.1	25695.5	21572	28034.7	34623.2	15999.4	34136.4	25695.5	28166.5	22105.5	6	6	6	6	6	7				x	x	x	x
6	1059.65	0.0153122	0.117124	3.19831	0.85354	Ctrl	Mutant	50320	| NADH-plastoquinone oxidoreductase subunit 2 [Picramnia pentandra]	14583.8	35728.4	19381.3	7684.05	6561.91	7544.79	23865.5	15575.9	34186.1	7684.05	8567.87	5949.11	7	8	8	6	6	4	x	x	x	x	x	x	x
2	42.2	0.991644	0.687039	1.03135	0.0500088	Ctrl	Mutant	22701	| _	7801.04	49526.5	10095.8	23990.3	4542.12	36841.7	12765.9	21591.3	17807.7	23990.3	5930.63	29049.9	1	1	0	2	1	1				x	x	x	x
4	96.04	0.350158	0.511498	1.21077	0.1308	Ctrl	Mutant	89018	| hypothetical protein MIMGU_mgv1a002882mg [Erythranthe guttata]	1698.43	2167.51	1287.46	1477.54	1245.04	1533.71	2779.37	944.935	2270.91	1477.54	1625.64	1209.34	1	0	2	1	2	1				x	x	x	x
1	194.47	0.770611	0.640008	1.87557	0.0569306	Ctrl	Mutant	74330	| PREDICTED: patatin group A-3-like [Vitis vinifera]	162.454	14.8065	217.329	30.9942	121.809	57.5805	265.845	6.45496	383.341	30.9942	159.046	45.4025	0	0	0	0	1	0			x	x		x	x
1	170.25	0.579338	0.589395	1.13586	0.0759834	Ctrl	Mutant	59382	| _	3707.15	6170.06	4255.84	3420.44	3724.92	5297.23	6066.52	2689.86	7506.75	3420.44	4863.62	4176.89	3	3	2	3	3	2				x		x	x
4	118.03	0.308132	0.487887	1.24297	0.148651	Ctrl	Mutant	137011	| PREDICTED: uncharacterized protein LOC100262932 [Vitis vinifera]	2738.92	4620.65	3896.24	2787.16	2772.23	3496.19	4482.07	2014.39	6872.47	2787.16	3619.69	2756.77	1	0	1	1	1	1				x	x	x	x
2	76.12	0.748419	0.640008	1.18341	0.0584104	Ctrl	Mutant	46395	| hypothetical protein MIMGU_mgv1a011778mg [Erythranthe guttata]	125.484	93.0835	362.402	94.0315	73.8946	323.001	205.347	40.5801	639.231	94.0315	96.4839	254.688	0	0	2	0	1	0				x	x	x	x
5	111.1	0.664598	0.61176	1.12736	0.065587	Ctrl	Mutant	27676	| PREDICTED: copper transport protein CCH-like [Oryza brachyantha]	7557.89	12322.8	6911.57	7044.84	6357.55	10363.1	12368	5372.17	12191.1	7044.84	8301.04	8171.37	1	1	1	1	1	0				x	x	x	x
3	269.2	0.825379	0.654153	1.01155	0.0539446	Ctrl	Mutant	12892	| late embryogenesis abundant protein [Catharanthus roseus]	5220.46	10493.6	4333.01	6722.12	6210.85	6885.27	8542.95	4574.73	7642.86	6722.12	8109.49	5429.08	6	3	5	5	4	3				x	x	x	x
2	309.98	0.924497	0.671724	1.00318	0.050723	Ctrl	Mutant	48204	| hypothetical protein MIMGU_mgv1a011312mg [Erythranthe guttata]	611.216	853.993	543.707	686.199	617.807	698.542	1000.22	372.302	959.028	686.199	806.668	550.805	4	3	4	3	3	3				x	x	x	x
1	66	0.38652	0.531058	1.16471	0.118081	Ctrl	Mutant	20438	| PREDICTED: vacuolar amino acid transporter 1 [Vitis vinifera]	135.023	134.219	114.752	148.568	101.166	79.9572	220.957	58.5135	202.408	148.568	132.092	63.0467	1	0	0	0	0	0				x		x	x
3	175.18	0.0194397	0.124188	1.54315	0.803641	Ctrl	Mutant	49837	| cinnamoyl-CoA reductase [Camellia oleifera]	534.22	475.603	545.258	286.794	411.232	309.708	874.217	207.341	961.765	286.794	536.944	244.206	3	1	2	1	2	1	x		x	x	x	x	x
2	111.4	0.543504	0.576584	1.12921	0.0815226	Ctrl	Mutant	43792	| PREDICTED: cyanate hydratase-like [Solanum lycopersicum]	562.948	800.87	507.801	561.37	460.733	635.348	921.229	349.142	895.695	561.37	601.577	500.976	1	1	0	2	0	1				x	x	x	x
2	280.26	0.463672	0.552654	1.2568	0.0971285	Ctrl	Mutant	45290	| CuZn-superoxide dismutase 2 [Haberlea rhodopensis]	1521.03	2651.05	1303.15	1617	1234.33	1505.18	2489.06	1155.74	2298.59	1617	1611.66	1186.84	3	1	2	3	2	3				x	x	x	x
9	421.28	0.0780328	0.257612	1.97017	0.435562	Ctrl	Mutant	49268	| _	2320.51	4541.71	3034.32	1368.18	1205.96	2449.06	3797.37	1979.98	5352.15	1368.18	1574.61	1931.1	5	4	10	4	3	3			x	x	x	x	x
2	225.17	0.625879	0.604061	1.12511	0.0698698	Ctrl	Mutant	96322	| hydroxyproline-rich glycoprotein [Populus trichocarpa]	1979.86	1656.44	2868.07	1472.67	2945.61	1362.83	3239.91	722.13	5058.9	1472.67	3846.08	1074.6	1	0	1	1	1	0				x	x	x	x
6	1586.24	0.568315	0.587228	1.03957	0.0776045	Ctrl	Mutant	79554	| hypothetical protein MIMGU_mgv1a003950mg [Erythranthe guttata]	5257.46	5645.87	5468.31	4959.31	5956.09	4833.08	8603.5	2461.34	9645.39	4959.31	7776.85	3810.91	7	3	7	7	5	4				x	x	x	x
1	69.33	0.0192119	0.124188	13.8875	0.806273	Ctrl	Mutant	41486	| unnamed protein product [Coffea canephora]	37.2596	12.028	38.7427	1.70395	4.534	0.100886	60.973	5.24365	68.3371	1.70395	5.92003	0.0795488	1	0	0	0	0	0	x	x	x	x		x	x
2	366.81	0.242673	0.441402	1.45822	0.186197	Ctrl	Mutant	40081	| hypothetical protein MIMGU_mgv1a011536mg [Erythranthe guttata]	500.007	965.632	528.003	393.148	375.382	598.649	818.23	420.971	931.328	393.148	490.136	472.038	2	0	1	1	1	0				x	x	x	x
5	717.62	0.487407	0.556929	1.05264	0.0919499	Ctrl	Mutant	87192	| PREDICTED: anthocyanidin 3-O-glucosyltransferase-like [Solanum tuberosum]	1453.62	1510.78	1328.17	1257.26	1519.97	1300.69	2378.76	658.632	2342.72	1257.26	1984.62	1025.6	2	1	1	3	5	1				x	x	x	x
2	337.76	0.294473	0.483658	1.35569	0.155359	Ctrl	Mutant	40358	| SOD2 [Scutellaria baicalensis]	2664.88	4744.1	2447.53	2737.62	2357.67	2175.21	4360.9	2068.21	4317.13	2737.62	3078.41	1715.16	4	3	3	4	2	2				x	x	x	x
4	101.39	0.709933	0.624993	1.07065	0.0613776	Ctrl	Mutant	50730	| chloroplast lipocalin [Ipomoea nil]	1017.33	1622.11	1153.72	921.591	808.64	1812.63	1664.79	707.166	2035.01	921.591	1055.84	1429.27	0	0	2	1	0	1				x	x	x	x
1	95.43	0.465918	0.552654	3.17786	0.0966165	Ctrl	Mutant	142267	| PREDICTED: uncharacterized protein LOC102661627 [Glycine max]	91.1866	90.2641	0	57.0984	0	0	149.221	39.351	0	57.0984	0	0	1	0	0	0	0	0		x	x	x		x	x
3	221.08	0.019454	0.124188	1.55925	0.803476	Ctrl	Mutant	36630	| unnamed protein product [Vitis vinifera]	2580.66	3387.71	2975.52	1946.8	2177.97	1611.23	4223.09	1476.88	5248.43	1946.8	2843.77	1270.46	3	2	3	2	2	2	x		x	x	x	x	x
7	144.27	0.876312	0.656689	1.02308	0.0519551	Ctrl	Mutant	74773	| hypothetical protein MIMGU_mgv1a027162mg [Erythranthe guttata]	6132.79	10079.7	3899.67	7461.84	6010.17	6186.57	10035.9	4394.3	6878.52	7461.84	7847.46	4878.14	1	1	0	4	6	3				x	x	x	x
4	448.88	0.965178	0.684223	1.00534	0.0501532	Ctrl	Mutant	85117	| chloroplast photosystem II 22 kDa component [Nicotiana benthamiana]	2208.47	3047	2114.45	2376.46	2269.37	2684.92	3614.02	1328.35	3729.61	2376.46	2963.11	2117.07	2	2	3	2	2	4				x	x	x	x
1	98.2	0.122321	0.325664	3.89427	0.323794	Ctrl	Mutant	50438	| hypothetical protein MIMGU_mgv1a012480mg [Erythranthe guttata]	100.596	23.5703	149.437	23.1638	27.8905	19.2037	164.619	10.2756	263.587	23.1638	36.4165	15.1422	0	0	1	0	0	0		x	x	x		x	x
2	158.61	0.0491311	0.193631	1.37752	0.561751	Ctrl	Mutant	51910	| _	1313.25	1647.16	1135.19	988.283	954.064	1030.82	2149.05	718.084	2002.33	988.283	1245.72	812.811	1	2	2	2	2	1	x			x	x	x	x
3	120.64	0.106326	0.298737	1.49659	0.357057	Ctrl	Mutant	27994	| PREDICTED: probable histone H2A.2-like [Cicer arietinum]	845.134	666.045	519.522	569.534	425.521	361.827	1383.01	290.365	916.37	569.534	555.602	285.303	5	1	2	3	2	1				x	x	x	x
2	160.86	0.121027	0.323818	1.50814	0.326263	Ctrl	Mutant	36356	| Histone superfamily protein [Theobroma cacao]	2682.17	4605.76	4377.97	3059.35	2526.84	2149.13	4389.21	2007.9	7722.17	3059.35	3299.28	1694.6	1	1	3	1	1	0			x	x	x	x	x
5	805.99	0.67919	0.616716	1.15365	0.0641424	Ctrl	Mutant	61991	| hypothetical protein MIMGU_mgv1a013850mg [Erythranthe guttata]	15781.6	28148.6	14147.6	17514.5	16159.1	16669.3	25825.7	12271.5	24954.6	17514.5	21098.9	13143.8	7	6	7	4	5	6				x	x	x	x
1	165.1	0.00292468	0.0470991	5.88543	0.996325	Ctrl	Mutant	42826	| PE-PGRS family protein PE_PGRS46 [Mycobacterium tuberculosis H2398]	2642.18	5251.35	2462.29	569.418	482.19	707.961	4323.76	2289.34	4343.15	569.418	629.594	558.231	1	1	1	1	1	1	x	x	x	x		x	x
3	632.81	0.154327	0.368157	1.62532	0.272281	Ctrl	Mutant	97983	| plastocyanin precursor [Solanum tuberosum]	13065.2	23847.9	15096.7	8507.07	7737.41	15755.2	21380.4	10396.6	26628.6	8507.07	10102.7	12423.1	6	5	5	5	3	5			x	x	x	x	x
3	138.53	0.648085	0.61176	1.03201	0.0673311	Ctrl	Mutant	103985	| _	3034.75	2914.01	3378.14	2805.6	3289.3	2942.69	4966.18	1270.37	5958.6	2805.6	4294.83	2320.33	0	0	2	0	1	1				x	x	x	x
2	119.34	0.215161	0.421553	1.18058	0.207188	Ctrl	Mutant	36554	| cox2 gene product (mitochondrion) [Beta vulgaris subsp. vulgaris]	945.104	1275.76	1025.32	881.098	835.066	1033.5	1546.6	556.174	1808.54	881.098	1090.34	814.919	1	1	0	1	2	0				x	x	x	x
8	721.01	0.156627	0.369135	1.26196	0.269165	Ctrl	Mutant	68231	| unnamed protein product [Coffea canephora]	5607.95	7911.95	6080.56	5134.19	5911.42	4486.1	9177.05	3449.24	10725.3	5134.19	7718.52	3537.31	9	6	6	5	8	3				x	x	x	x
3	308.89	0.405758	0.540971	1.27914	0.112173	Ctrl	Mutant	93194	| hypothetical protein MIMGU_mgv1a015106mg [Erythranthe guttata]	2832.86	3211.57	1845.47	2567.33	2392.87	1207.91	4635.8	1400.1	3255.16	2567.33	3124.36	952.445	3	3	6	3	3	1				x	x	x	x
5	1709.88	0.96484	0.684223	1.01565	0.0501562	Ctrl	Mutant	98017	| _	7903.98	12186.2	9646.85	9402.27	8516.19	11360.4	12934.4	5312.61	17015.8	9402.27	11119.6	8957.74	3	3	5	3	6	3				x	x	x	x
2	412.5	0.126207	0.327597	1.42974	0.316591	Ctrl	Mutant	63356	| _	3971.4	4688.73	2988.24	2891.43	2070.93	3184.85	6498.95	2044.07	5270.87	2891.43	2704.01	2511.27	2	0	1	1	1	0				x	x	x	x
2	55.57	0.70196	0.620456	1.41945	0.0620595	Ctrl	Mutant	87101	| PREDICTED: uncharacterized protein LOC102615733 [Citrus sinensis]	481.631	1092.86	187.102	634.222	146.208	460.609	788.159	476.435	330.024	634.222	190.903	363.193	1	0	0	0	0	1				x	x	x	x
1	158.98	0.17051	0.381562	1.27454	0.251664	Ctrl	Mutant	57860	| hypothetical protein MIMGU_mgv1a014418mg [Erythranthe guttata]	1021.21	1319.71	1004.95	988.131	957.366	679.663	1671.14	575.332	1772.59	988.131	1250.03	535.918	2	1	1	2	1	0				x		x	x
2	241.5	0.944013	0.67971	1.0314	0.0503967	Ctrl	Mutant	38936	| hypothetical protein MIMGU_mgv1a012906mg [Erythranthe guttata]	978.914	1504.52	947.107	1025.43	1041.81	1258.86	1601.93	655.9	1670.57	1025.43	1360.29	992.618	3	2	3	1	2	2				x	x	x	x
7	840.42	0.657362	0.61176	1.05192	0.0663367	Ctrl	Mutant	41212	| chitinase [Hevea brasiliensis]	34337.4	41028.9	31956	29114.5	36655.6	36254.7	56191	17886.7	56366.2	29114.5	47861.1	28587	12	6	11	6	11	5				x	x	x	x
13	1877.01	0.00587272	0.0747793	1.49373	0.973323	Ctrl	Mutant	142710	| catalase [Sesamum indicum]	37927.9	46967.1	38313.6	26854.1	28912.7	26717.2	62066.6	20475.5	67580.2	26854.1	37751.2	21066.6	19	10	15	11	13	7	x			x	x	x	x
1	203.2	0.470813	0.552654	1.14253	0.0955167	Ctrl	Mutant	56676	| hypothetical protein MIMGU_mgv1a011577mg [Erythranthe guttata]	56.772	75.3368	47.8495	56.164	56.3776	44.9666	92.9038	32.8434	84.4003	56.164	73.6121	35.4564	0	0	0	0	1	0				x		x	x
1	101.44	0.00154945	0.0300897	33.2905	0.99973	Ctrl	Mutant	44742	| Dehydroascorbate reductase 1 isoform 1 [Theobroma cacao]	18.6996	37.6616	22.9063	0.446614	1.8223	0.112174	30.6007	16.4187	40.4036	0.446614	2.37937	0.08845	0	0	1	0	0	0	x	x	x	x		x	x
1	85.39	0.53261	0.572743	1.11326	0.0833686	Ctrl	Mutant	16749	| molecular chaperone Mod-E/Hsp90 [Aspergillus clavatus NRRL 1]	404.221	511.545	415.313	313.169	319.764	562.725	661.481	223.01	732.558	313.169	417.515	443.712	0	0	0	0	0	1				x		x	x
5	179.61	0.823787	0.654153	1.06693	0.0540186	Ctrl	Mutant	52456	| hypothetical protein MIMGU_mgv1a012197mg [Erythranthe guttata]	1984.07	2846.54	1614.89	2364.15	1789.7	1887.34	3246.81	1240.96	2848.45	2364.15	2336.81	1488.18	3	3	2	4	4	2				x	x	x	x
5	165.34	0.0484266	0.193631	1.42036	0.565769	Ctrl	Mutant	70674	| hypothetical protein MIMGU_mgv1a014206mg [Erythranthe guttata]	638.586	880.689	854.98	593.408	484.337	593.84	1045.01	383.94	1508.07	593.408	632.398	468.246	1	3	6	1	1	2	x			x	x	x	x
1	40.62	0.35012	0.511498	1.31737	0.130814	Ctrl	Mutant	32816	| hypothetical protein MIMGU_mgv1a002229mg [Erythranthe guttata]	80.3224	81.7246	60.8631	74.2845	68.2223	26.7017	131.443	35.6281	107.355	74.2845	89.0776	21.0544	0	0	0	0	1	0				x		x	x
5	108.59	0.270933	0.455866	1.1846	0.168199	Ctrl	Mutant	33588	| hypothetical protein MIMGU_mgv1a016370mg [Erythranthe guttata]	1292.22	1648.78	1254.16	1101.69	1010.88	1428.86	2114.64	718.793	2212.17	1101.69	1319.9	1126.66	1	1	0	2	3	0				x	x	x	x
3	136.13	0.730122	0.631986	1.06636	0.0597556	Ctrl	Mutant	50429	| hypothetical protein M569_15006 [Genlisea aurea]	1180.53	1751.16	1245.57	1396.12	1092.86	1428.32	1931.86	763.425	2197.02	1396.12	1426.95	1126.24	2	2	2	1	3	1				x	x	x	x
1	28.17	0.194205	0.400708	1.14343	0.226153	Ctrl	Mutant	37650	| hypothetical protein MIMGU_mgv1a013361mg [Erythranthe guttata]	253.385	284.494	248.554	209.315	212.098	266.374	414.649	124.026	438.417	209.315	276.936	210.037	1	0	0	0	0	0				x		x	x
5	94.18	0.707103	0.623332	1.09514	0.0616169	Ctrl	Mutant	77844	| hypothetical protein MIMGU_mgv1a017270mg [Erythranthe guttata]	1736.87	2209.83	3007.33	1838.75	1956.03	2555.12	2842.28	963.382	5304.54	1838.75	2553.98	2014.73	0	1	4	1	2	2				x	x	x	x
6	306.19	0.0157218	0.117124	1.35473	0.84839	Ctrl	Mutant	46331	| hypothetical protein MIMGU_mgv1a013400mg [Erythranthe guttata]	3832.79	4126.58	3438.73	2513.07	2968.16	2932.35	6272.13	1799	6065.47	2513.07	3875.51	2312.18	5	2	5	2	7	3	x			x	x	x	x
3	166.92	0.774414	0.640008	1.0557	0.0566932	Ctrl	Mutant	33363	| ribosomal protein L11-like [Nicotiana tabacum]	1281.84	1883.12	1321.01	1462.08	1279.81	1507.42	2097.66	820.951	2330.08	1462.08	1671.04	1188.61	3	1	3	1	2	2				x	x	x	x
2	147.07	0.000720809	0.0191884	6.56329	0.999997	Ctrl	Mutant	70399	| hypothetical protein MIMGU_mgv1a006874mg [Erythranthe guttata]	528.785	374.905	483.127	68.6456	92.2765	50.377	865.323	163.441	852.173	68.6456	120.485	39.7226	1	0	1	0	0	0	x	x	x	x	x	x	x
1	60.83	0.21838	0.422842	1.34532	0.204522	Ctrl	Mutant	20555	| hypothetical protein MIMGU_mgv1a013915mg [Erythranthe guttata]	147.2	156.862	129.118	102.045	68.3782	151.567	240.883	68.3845	227.748	102.045	89.2812	119.511	0	0	0	1	0	0				x		x	x
1	447.39	0.68099	0.616716	1.06436	0.0639702	Ctrl	Mutant	102771	| hypothetical protein MIMGU_mgv1a008497mg [Erythranthe guttata]	372.862	366.426	300.91	375.01	418.702	183.59	610.164	159.745	530.766	375.01	546.699	144.762	1	0	0	0	0	0				x		x	x
10	1181.34	0.187613	0.393449	1.68847	0.232768	Ctrl	Mutant	30490	| hypothetical protein PHAVU_006G184200g [Phaseolus vulgaris]	6768.71	14307	6650.78	4970.52	4074.38	7376.14	11076.6	6237.18	11731.1	4970.52	5319.9	5816.13	13	9	9	8	5	9			x	x	x	x	x
1	100.94	0.769431	0.640008	1.03604	0.0570053	Ctrl	Mutant	42477	| hypothetical protein MIMGU_mgv1a012966mg [Erythranthe guttata]	224.681	295.866	250.992	265.103	267.432	212.168	367.677	128.984	442.717	265.103	349.186	167.296	0	1	0	0	1	1				x		x	x
5	447.3	0.840663	0.656689	1.04087	0.0532708	Ctrl	Mutant	35269	| hypothetical protein CICLE_v10022906mg [Citrus clementina]	8056.22	8871.67	13273.8	6285.35	12349.6	10381.1	13183.5	3867.64	23413.3	6285.35	16124.8	8185.52	4	4	6	3	4	3				x	x	x	x
1	165.12	0.671557	0.61176	1.05721	0.0648871	Ctrl	Mutant	39360	| DREPP plasma membrane polypeptide family protein [Populus trichocarpa]	389.801	385.643	341.288	413.221	402.919	240.162	637.885	168.122	601.987	413.221	526.09	189.369	1	0	0	0	0	0				x		x	x
2	260.72	0.0266448	0.144674	1.39373	0.727714	Ctrl	Mutant	62202	| hypothetical protein MIMGU_mgv1a008127mg [Erythranthe guttata]	518.81	492.958	464.067	343.121	415.241	300.546	849	214.907	818.554	343.121	542.179	236.982	1	0	1	0	3	0	x			x	x	x	x
4	253.71	0.612856	0.599544	1.48229	0.0714679	Ctrl	Mutant	38671	| hypothetical protein MIMGU_mgv1a013220mg [Erythranthe guttata]	2720.09	7938.07	2090.11	2957.82	2126.22	3516.37	4451.26	3460.63	3686.69	2957.82	2776.19	2772.67	4	4	5	1	1	2				x	x	x	x
3	117.97	0.133323	0.335967	1.4035	0.304157	Ctrl	Mutant	63090	| hypothetical protein ENH_00076330 [Eimeria necatrix]	373.923	340.458	550.438	263.574	281.741	355.873	611.902	148.424	970.901	263.574	367.868	280.608	1	0	2	0	0	1				x	x	x	x
6	760.69	0.028379	0.147541	1.69267	0.711447	Ctrl	Mutant	64586	| hypothetical protein MIMGU_mgv1a015773mg [Erythranthe guttata]	29659.4	49166.2	37633.5	23788.7	21225.2	23788	48535.8	21434.2	66380.6	23788.7	27713.7	18757	8	6	6	7	4	6	x		x	x	x	x	x
1	44.43	0.038142	0.173682	7.0098	0.631978	Ctrl	Mutant	69262	| hypothetical protein MIMGU_mgv1a025557mg [Erythranthe guttata]	25.6627	10.4265	20.5184	3.6571	4.25913	0.159264	41.9955	4.54545	36.1917	3.6571	5.56113	0.12558	1	0	0	0	0	0	x	x	x	x		x	x
5	195.17	0.414292	0.543537	1.18489	0.109712	Ctrl	Mutant	113755	| _	1591.75	2584.07	1637.66	1697.28	1565.37	1643.71	2604.8	1126.53	2888.62	1697.28	2043.9	1296.08	2	0	5	3	3	1				x	x	x	x
1	494.13	0.77841	0.640845	1.41588	0.0564487	Ctrl	Mutant	208275	| _	596.367	1625.91	271.397	626.648	283.924	850.644	975.918	708.822	478.709	626.648	370.719	670.738	0	0	1	0	0	0				x		x	x
3	445.19	0.386873	0.531058	1.66169	0.117968	Ctrl	Mutant	43390	| harpin binding protein 1 [Solanum tuberosum]	1964.27	6326.54	2223.32	2186.37	2058.47	2082.53	3214.4	2758.08	3921.64	2186.37	2687.74	1642.09	4	1	4	3	3	1			x	x	x	x	x
7	298.67	0.863146	0.656689	1.03452	0.0524001	Ctrl	Mutant	44609	| hypothetical protein MIMGU_mgv1a009433mg [Erythranthe guttata]	2495.39	3496.8	2473.86	2611.62	2605.61	2966.36	4083.55	1524.44	4363.57	2611.62	3402.14	2338.99	4	5	4	3	6	5				x	x	x	x
2	71.13	0.572985	0.589093	1.2286	0.0769091	Ctrl	Mutant	81994	| hypothetical protein MIMGU_mgv1a006761mg [Erythranthe guttata]	240.879	93.0709	254.483	174.577	274.422	29.9481	394.183	40.5746	448.875	174.577	358.312	23.6143	1	0	1	0	1	0				x	x	x	x
1	45.65	0.575964	0.589395	1.37944	0.0764721	Ctrl	Mutant	25134	| _	6642.5	20609	7586.56	6724.48	4568.45	13962.2	10870	8984.57	13381.7	6724.48	5965.01	11009.3	0	0	0	1	1	0				x		x	x
2	63.84	0.399862	0.538246	1.28086	0.11393	Ctrl	Mutant	29041	| _	627.074	1183.59	760.64	607.855	494.525	905.111	1026.17	515.992	1341.67	607.855	645.699	713.685	2	0	1	1	2	2				x	x	x	x
1	372.02	0.666706	0.61176	2.0057	0.0653728	Ctrl	Mutant	49639	| unnamed protein product [Coffea canephora]	1002.39	4848.3	594.874	1221.63	1144.48	847.506	1640.34	2113.63	1049.28	1221.63	1494.35	668.264	0	1	0	0	0	0		x	x	x		x	x
1	44.91	0.0497714	0.193631	1.36787	0.55815	Ctrl	Mutant	38766	| hypothetical protein JCGZ_04044 [Jatropha curcas]	287.695	375.036	279.883	231.891	205.247	251.973	470.795	163.498	493.678	231.891	267.991	198.682	0	1	0	0	0	1	x			x		x	x
1	42.89	0.638027	0.60828	1.35429	0.0684527	Ctrl	Mutant	56622	| PREDICTED: uncharacterized protein LOC101257023 [Solanum lycopersicum]	1173.25	2184.8	635.173	1110.24	869.726	968.622	1919.95	952.473	1120.36	1110.24	1135.6	763.764	0	1	0	0	0	1				x		x	x
1	68.52	0.00509416	0.0686428	2.01301	0.98108	Ctrl	Mutant	56796	| hypothetical protein MIMGU_mgv1a006610mg [Erythranthe guttata]	119.285	138.196	107.119	55.015	73.2631	52.844	195.202	60.2471	188.944	55.015	95.6594	41.6678	2	1	1	1	1	0	x	x	x	x		x	x
2	49.61	0.422394	0.545182	1.29362	0.107459	Ctrl	Mutant	56964	| hypothetical protein MIMGU_mgv1a006610mg [Erythranthe guttata]	238.017	486.772	378.74	247.253	209.314	396.487	389.5	212.21	668.047	247.253	273.3	312.632	1	1	3	0	0	0				x	x	x	x
5	174.05	0.854759	0.656689	1.0405	0.0527084	Ctrl	Mutant	66940	| _	4843.78	7006.07	4720.95	4908.03	4831.01	6186.82	7926.55	3054.32	8327.14	4908.03	6307.83	4878.35	4	2	8	1	4	3				x	x	x	x
1	69.52	0.00957438	0.0899767	1.82368	0.928393	Ctrl	Mutant	45736	| PREDICTED: uncharacterized protein LOC100256940 [Vitis vinifera]	110.878	128.782	129.814	78.3685	52.5742	71.655	181.444	56.1429	228.975	78.3685	68.646	56.5004	1	0	0	0	0	0	x		x	x		x	x
9	515.46	0.0910629	0.277533	1.18631	0.395578	Ctrl	Mutant	62800	| unnamed protein product [Coffea canephora]	3576.72	3996.24	3928.61	3143.4	3671.36	2880.5	5853.08	1742.18	6929.56	3143.4	4793.69	2271.29	8	3	6	6	9	4				x	x	x	x
2	189.12	0.309193	0.488396	1.62419	0.148151	Ctrl	Mutant	48574	| PREDICTED: protein lin-28 homolog [Brachypodium distachyon]	204.465	329.84	541.738	180.384	101.985	380.144	334.593	143.795	955.556	180.384	133.161	299.746	1	1	3	0	0	1			x	x	x	x	x
4	188.82	0.0959261	0.286592	1.39953	0.382453	Ctrl	Mutant	136114	| hypothetical protein MIMGU_mgv1a000648mg [Erythranthe guttata]	2125.16	2737.58	1802.71	1611.68	1330.85	1820.09	3477.69	1193.46	3179.75	1611.68	1737.68	1435.16	2	0	1	1	2	0				x	x	x	x
2	71	0.0123857	0.104685	1.30383	0.891345	Ctrl	Mutant	35123	| hypothetical protein MIMGU_mgv1a015903mg [Erythranthe guttata]	314.651	365.675	310.511	251.571	240.629	267.742	514.907	159.417	547.7	251.571	314.188	211.116	0	1	2	1	1	2	x			x	x	x	x
1	54.85	0.412173	0.543537	1.13573	0.110315	Ctrl	Mutant	33497	| hypothetical protein JCGZ_16969 [Jatropha curcas]	61.3013	74.19	69.7092	44.3421	63.0684	73.2675	100.316	32.3434	122.958	44.3421	82.3483	57.7718	1	0	0	0	2	0				x		x	x
2	407.5	0.519723	0.568138	1.43078	0.0856585	Ctrl	Mutant	19145	| _	714.766	1421.13	436.738	601.61	420.326	776.131	1169.67	619.546	770.349	601.61	548.818	611.984	0	2	0	1	1	1				x	x	x	x
2	191.61	0.635028	0.60828	1.04295	0.0687961	Ctrl	Mutant	51711	| hypothetical protein MIMGU_mgv1a009899mg [Erythranthe guttata]	724.138	597.87	635.684	620.696	693.886	562.492	1185.01	260.644	1121.26	620.696	906.005	443.528	1	1	2	2	2	0				x	x	x	x
3	366.16	0.601928	0.597331	1.1239	0.0728745	Ctrl	Mutant	38669	| late embryogenesis abundant protein [Catharanthus roseus]	1185.22	1905.71	1564.91	1588.86	930.898	1622.82	1939.54	830.8	2760.3	1588.86	1215.47	1279.6	2	1	0	1	1	2				x	x	x	x
1	532.98	0.867687	0.656689	2.79932	0.0522412	Ctrl	Mutant	29126	| hypothetical protein MIMGU_mgv1a022096mg [Erythranthe guttata]	54.5794	0	155.088	12.9812	20.4063	41.5118	89.3158	0	273.554	12.9812	26.6445	32.7323	0	0	1	0	0	0		x	x	x		x	x
1	44.18	0.866833	0.656689	1.08589	0.0522707	Ctrl	Mutant	36986	| PREDICTED: uncharacterized protein LOC101267845 [Solanum lycopersicum]	3745.23	7318.41	3811.42	4197.7	3865.94	5634.88	6128.84	3190.49	6722.85	4197.7	5047.74	4443.14	1	1	2	0	0	0				x		x	x
1	261.91	0.664682	0.61176	1.08984	0.0655784	Ctrl	Mutant	138163	| hypothetical protein [Beta vulgaris subsp. vulgaris]	281.355	351.636	230.678	310.953	179.305	302.214	460.42	153.297	406.886	310.953	234.118	238.298	0	0	0	0	0	1				x		x	x
2	16.28	0.305488	0.487206	1.4489	0.149911	Ctrl	Mutant	19723	| hypothetical protein HMPREF1120_08078 [Exophiala dermatitidis NIH/UT8656]	6023.81	10652.2	4428.91	4940.62	4562	5063.53	9857.59	4643.88	7812.02	4940.62	5956.59	3992.62	3	2	3	2	3	2				x	x	x	x
3	93.91	0.00270332	0.0457669	2.53229	0.997212	Ctrl	Mutant	42461	| hypothetical protein MIMGU_mgv1a012999mg [Erythranthe guttata]	903.737	1368.9	925.906	433.115	396.826	433.162	1478.91	596.778	1633.18	433.115	518.134	341.55	2	1	2	1	1	1	x	x	x	x	x	x	x
3	242.71	0.507487	0.558892	1.22921	0.0879446	Ctrl	Mutant	55427	| plasma membrane intrinsic protein PIP1-1 [Fraxinus excelsior]	442.56	644.616	322.375	503.183	257.928	385.603	724.222	281.023	568.627	503.183	336.776	304.05	1	1	3	0	1	1				x	x	x	x
2	749.2	0.871297	0.656689	1.06267	0.052119	Ctrl	Mutant	36649	| _	3254.3	5407.02	3154.18	4087.33	3568	3463.38	5325.45	2357.21	5563.56	4087.33	4658.72	2730.89	1	2	0	1	2	0				x	x	x	x
1	98.08	0.426073	0.546479	1.36762	0.106463	Ctrl	Mutant	25288	| 20 kDa chaperonin [Medicago GroES chaperonin [Medicago truncatula]	1529.79	3831.43	2269.91	2080.08	1500.71	1999.08	2503.4	1670.33	4003.83	2080.08	1959.47	1576.29	0	1	0	0	0	0				x		x	x
13	2313.86	0.368168	0.523898	1.41951	0.124226	Mutant	Ctrl	81384	| polyphenol oxidase [Sesamum indicum]	21553.8	25617.3	29266.4	24814.9	56930.8	26757.8	21553.8	33448.5	23076.7	40608.1	24819.2	47197.3	18	12	24	17	21	15				x	x	x	x
5	1965.14	0.0474628	0.193631	1.4482	0.571362	Mutant	Ctrl	76068	| polyphenol oxidase [Sesamum indicum]	11709.8	11298.9	10435	14015.7	20264	14153.4	11709.8	14752.9	8228.08	22935.9	8834.14	24964.7	4	4	5	6	7	6	x			x	x	x	x
1	29.51	0.632995	0.607479	1.32424	0.0690312	Ctrl	Mutant	32917	| hypothetical protein EUGRSUZ_G029021 [Eucalyptus grandis]	71.266	129.214	39.2033	66.773	76.9956	37.2283	116.622	56.3314	69.1495	66.773	100.533	29.3547	0	1	0	0	1	0				x		x	x
2	103.52	0.0990128	0.287943	1.94119	0.374556	Ctrl	Mutant	124216	| hypothetical protein MIMGU_mgv1a004143mg [Erythranthe guttata]	531.58	573.158	306.677	325.772	261.319	139.997	869.897	249.87	540.938	325.772	341.203	110.389	0	0	0	0	2	0			x	x	x	x	x
3	117.1	0.995083	0.687172	1.03335	0.050003	Ctrl	Mutant	25495	| hypothetical protein JCGZ_05889 [Jatropha curcas]	569.025	1333.91	567.533	613.627	601.273	1175.83	931.174	581.521	1001.05	613.627	785.08	927.148	0	1	2	0	0	2				x	x	x	x
2	90.96	0.20026	0.409487	1.37377	0.220366	Ctrl	Mutant	70236	| unnamed protein product [Coffea canephora]	135.575	188.208	199.926	111.204	175.594	94.4231	221.859	82.0499	352.643	111.204	229.272	74.4532	1	1	0	0	3	0				x	x	x	x
4	309.12	0.985051	0.686777	1.00255	0.0500282	Ctrl	Mutant	51475	| temperature-induced lipocalin [Nicotiana tabacum]	3656.79	4268.08	3413.17	3838.28	3605.47	3865.47	5984.11	1860.68	6020.4	3838.28	4707.65	3047.95	3	1	4	2	1	2				x	x	x	x
1	91.73	0.3377	0.508287	1.86301	0.135698	Ctrl	Mutant	27748	| protease inhibitor-related protein [Solanum tuberosum]	819.466	1440.89	470.581	773.968	654.543	37.3639	1341	628.163	830.044	773.968	854.635	29.4617	2	1	1	1	1	0			x	x		x	x
3	1392.37	0.436438	0.552037	1.20226	0.103738	Ctrl	Mutant	165889	| phosphoglycerate kinase [Gossypium hirsutum]	1611.28	2669.97	1552.76	1531.84	1638.72	1681.98	2636.75	1163.98	2738.87	1531.84	2139.67	1326.25	3	2	1	3	3	1				x	x	x	x
2	96.89	0.171736	0.381562	1.24098	0.250219	Ctrl	Mutant	42441	| hypothetical protein MIMGU_mgv1a015102mg [Erythranthe guttata]	1067.43	1487.79	1268.65	1042.28	870.134	1168.92	1746.78	648.608	2237.73	1042.28	1136.13	921.699	3	2	3	1	2	2				x	x	x	x
5	1117.16	0.663268	0.61176	1.20642	0.0657232	Ctrl	Mutant	52565	| unnamed protein product [Vitis vinifera]	19606.8	39812.9	17629.8	21712.7	16734.9	25418.4	32085.3	17356.6	31096.6	21712.7	21850.7	20042.5	6	5	6	5	4	5				x	x	x	x
8	228.58	0.768925	0.640008	1.05575	0.0570374	Ctrl	Mutant	52915	| hypothetical protein CICLE_v10016592mg [Citrus clementina]	3982.49	5639.03	3870.88	3761.29	3951.33	5067.33	6517.1	2458.36	6827.73	3761.29	5159.24	3995.62	5	4	11	5	4	7				x	x	x	x
3	115.96	0.951509	0.682879	1.07672	0.0502974	Ctrl	Mutant	53388	| hypothetical protein MIMGU_mgv1a013971mg [Erythranthe guttata]	4062.93	7809.53	3580.8	4593.11	4387.8	5371.24	6648.74	3404.59	6316.06	4593.11	5729.13	4235.26	3	1	2	1	2	1				x	x	x	x
3	168.16	0.253524	0.45364	1.13968	0.178911	Ctrl	Mutant	133607	| _	1877.37	2423.47	1835.24	1754.29	1746.1	1883.66	3072.19	1056.52	3237.12	1754.29	2279.87	1485.28	2	2	3	3	1	4				x	x	x	x
7	1100.32	0.304187	0.487206	1.49957	0.150537	Ctrl	Mutant	105461	| hypothetical protein MIMGU_mgv1a012797mg [Erythranthe guttata]	7966.97	18545.3	8496.78	7659.57	8890.57	6795.91	13037.5	8084.9	14987.2	7659.57	11608.4	5358.61	5	2	7	4	6	3				x	x	x	x
1	157	0.843907	0.656689	1.01695	0.0531364	Ctrl	Mutant	50659	| hypothetical protein MIMGU_mgv1a010047mg [Erythranthe guttata]	2356.18	2798.7	2708.46	2125.08	2733.87	2873.33	3855.74	1220.11	4777.36	2125.08	3569.61	2265.64	0	0	0	0	0	1				x		x	x
3	153.98	0.299468	0.484788	1.73749	0.152848	Ctrl	Mutant	27628	| alpha chain of nascent polypeptide associated complex [Nicotiana benthamiana]	964.268	2570.62	917.795	772.814	554.436	1235.47	1577.96	1120.67	1618.87	772.814	723.926	974.173	3	2	4	1	0	0			x	x	x	x	x
3	135.06	0.988144	0.686777	1.00239	0.0500177	Ctrl	Mutant	53557	| PREDICTED: 60S ribosomal protein L8 [Vitis vinifera]	963.315	1136.56	956.667	927.58	1054.61	1067.07	1576.41	495.487	1687.44	927.58	1377.01	841.393	0	1	2	1	0	0				x	x	x	x
2	568.63	0.318915	0.495456	1.25389	0.143694	Ctrl	Mutant	37539	| hypothetical protein MIMGU_mgv1a013647mg [Erythranthe guttata]	2461.27	3354.37	1931.68	2045.38	1745.13	2388.13	4027.71	1462.35	3407.23	2045.38	2278.61	1883.06	2	1	3	1	3	1				x	x	x	x
2	89.94	0.22468	0.429358	1.45035	0.199477	Ctrl	Mutant	26141	| HIS triad family protein 3 [Theobroma cacao]	507.537	867.175	444.098	446.756	323.14	484.156	830.553	378.048	783.331	446.756	421.922	381.76	2	2	1	0	1	0				x	x	x	x
2	114.29	0.0440085	0.187467	1.67719	0.59238	Ctrl	Mutant	43569	| hypothetical protein MIMGU_mgv1a015100mg [Erythranthe guttata]	820.066	934.424	741.729	535.906	343.04	609.388	1341.99	407.365	1308.31	535.906	447.907	480.506	0	0	0	2	0	0	x		x	x	x	x	x
2	474.7	0.658663	0.61176	1.10255	0.0662002	Ctrl	Mutant	58576	| _	2877.88	4730.81	3449.28	2811.39	2726.48	4491.53	4709.46	2062.41	6084.08	2811.39	3559.96	3541.6	3	2	2	2	2	3				x	x	x	x
7	508.74	0.0420994	0.182015	1.9314	0.604695	Ctrl	Mutant	65575	| unnamed protein product [Coffea canephora]	2216.92	4361.37	2560.07	1555.65	1492.93	1682.89	3627.84	1901.35	4515.63	1555.65	1949.32	1326.97	6	4	7	1	2	1	x		x	x	x	x	x
4	150.99	0.114288	0.313812	1.46371	0.33972	Ctrl	Mutant	66827	| unnamed protein product [Coffea canephora]	288.164	399.635	303.55	192.59	177.282	307.411	471.562	174.222	535.422	192.59	231.476	242.396	1	1	3	0	0	0				x	x	x	x
2	68.82	0.202511	0.409487	1.17352	0.218281	Ctrl	Mutant	26937	| hypothetical protein MIMGU_mgv1a016675mg [Erythranthe guttata]	829.567	972.946	859.276	826.751	826.283	615.183	1357.53	424.159	1515.65	826.751	1078.87	485.076	1	1	1	0	1	1				x	x	x	x
4	76.91	0.537145	0.575811	1.32579	0.0825904	Ctrl	Mutant	64718	| hypothetical protein PRUPE_ppa007617mg [Prunus persica]	1321.31	1744.89	619.406	1505.47	391.085	883.375	2162.24	760.691	1092.55	1505.47	510.638	696.546	0	1	2	1	1	0				x	x	x	x
1	66.23	0.24446	0.442215	1.19725	0.184963	Ctrl	Mutant	101501	| hypothetical protein MIMGU_mgv1a014379mg [Erythranthe guttata]	115.672	115.3	105.638	122.381	79.6323	79.139	189.289	50.2653	186.331	122.381	103.976	62.4016	1	0	1	0	0	0				x		x	x
4	83.21	0.47075	0.552654	1.30429	0.0955308	Ctrl	Mutant	81859	| PREDICTED: coiled-coil domain-containing protein 111 homolog isoform X1 [Solanum tuberosum]	2417.24	5045.11	2403.49	2787.57	2072.28	2704.31	3955.67	2199.43	4239.45	2787.57	2705.77	2132.37	2	1	3	1	1	1				x	x	x	x
2	146.23	0.464564	0.552654	1.15804	0.0969246	Ctrl	Mutant	104826	| unnamed protein product [Coffea canephora]	622.731	1015.58	709.485	711.865	593.513	722.002	1019.06	442.746	1251.44	711.865	774.948	569.303	1	0	3	3	2	1				x	x	x	x
2	72.7	0.896599	0.662185	1.07534	0.0513614	Ctrl	Mutant	53753	| hypothetical protein MIMGU_mgv1a011618mg [Erythranthe guttata]	846.585	1433.72	693.522	973.989	758.098	1033.38	1385.38	625.034	1223.28	973.989	989.847	814.824	1	1	1	2	1	1				x	x	x	x
2	25.14	0.75255	0.640008	1.16243	0.0581225	Ctrl	Mutant	26092	| hypothetical protein MIMGU_mgv1a002144mg [Erythranthe guttata]	400.976	830.021	383.721	487.576	474.459	427.048	656.172	361.851	676.834	487.576	619.5	336.729	1	1	0	0	0	0				x	x	x	x
1	58.2	0.338722	0.508287	1.15715	0.135285	Ctrl	Mutant	35063	| hypothetical protein MIMGU_mgv1a014364mg [Erythranthe guttata]	364.52	468.822	362.193	320.565	291.612	420.999	596.514	204.384	638.862	320.565	380.757	331.96	0	1	2	0	0	1				x		x	x
2	52.61	0.824533	0.654153	1.03026	0.0539838	Ctrl	Mutant	38551	| hypothetical protein MIMGU_mgv1a012126mg [Erythranthe guttata]	438.181	427.815	563.782	462.013	403.116	522.658	717.056	186.507	994.437	462.013	526.347	412.119	3	0	1	2	0	0				x	x	x	x
1	64.77	0.191919	0.397233	1.15541	0.228409	Ctrl	Mutant	53837	| hypothetical protein MIMGU_mgv1a007966mg [Erythranthe guttata]	464.563	412.46	482.191	436.254	331.798	408.338	760.228	179.813	850.523	436.254	433.228	321.977	0	0	0	0	1	0				x		x	x
3	89.87	0.959442	0.683373	1.03226	0.050208	Ctrl	Mutant	163821	| PREDICTED: nitrate excretion transporter 1-like [Solanum tuberosum]	809.409	1232.18	600.215	884.506	807.623	867.115	1324.55	537.175	1058.7	884.506	1054.51	683.725	1	0	2	1	1	1				x	x	x	x
2	99.54	0.375984	0.526321	1.12	0.121544	Ctrl	Mutant	43014	| hypothetical protein MIMGU_mgv1a013934mg [Erythranthe guttata]	1065.37	1373.81	990.823	1079.27	957.491	1025.74	1743.41	598.918	1747.68	1079.27	1250.19	808.805	3	2	2	1	2	1				x	x	x	x
2	315.45	0.765218	0.640008	1.08783	0.0572753	Ctrl	Mutant	12931	| hypothetical protein ARALYDRAFT_482642 [Arabidopsis lyrata subsp. lyrata]	737.431	1241.89	751.153	762.659	766.517	980.848	1206.76	541.407	1324.94	762.659	1000.84	773.405	2	1	1	1	1	2				x	x	x	x
2	181.53	0.806439	0.651748	1.02693	0.054874	Ctrl	Mutant	21900	| PREDICTED: late embryogenesis abundant protein D-29-like [Cucumis melo]	355.384	451.65	392.903	367.562	330.657	470.246	581.564	196.899	693.029	367.562	431.738	370.791	3	1	0	2	1	0				x	x	x	x
1	67.07	0.924774	0.671724	1.02742	0.0507177	Ctrl	Mutant	38939	| hypothetical protein POPTR_0014s18940g [Populus trichocarpa]	89.4077	134.42	96.7328	112.185	105.62	94.2009	146.31	58.6008	170.624	112.185	137.908	74.278	0	0	1	0	0	0				x		x	x
1	129.81	0.610115	0.599462	1.17207	0.0718149	Ctrl	Mutant	18806	| seed maturation protein LEA 4 [Glycine tomentella]	122.237	265.391	225.538	59.1092	195.224	268.816	200.033	115.698	397.82	59.1092	254.904	211.963	1	1	0	0	1	0				x		x	x
1	481.42	0.935509	0.676544	2.10433	0.0505269	Ctrl	Mutant	50353	| hypothetical protein MIMGU_mgv1a012286mg [Erythranthe guttata]	65.2226	0	50.0573	18.4112	32.1648	4.20626	106.733	0	88.2946	18.4112	41.9975	3.31666	1	0	0	0	0	0		x	x	x		x	x
5	335.33	0.353714	0.511974	1.18713	0.129456	Ctrl	Mutant	92055	| Fe-superoxide dismutase [Haberlea rhodopensis]	1036.26	1424.27	1142.81	1046.57	749.174	1239.58	1695.77	620.916	2015.77	1046.57	978.194	977.418	2	1	1	1	2	3				x	x	x	x
1	91.34	0.763828	0.640008	1.20092	0.0573657	Ctrl	Mutant	85344	| hypothetical protein MIMGU_mgv1a001075mg [Erythranthe guttata]	109.557	13.6541	210.465	69.0837	128.482	80.2841	179.283	5.95256	371.233	69.0837	167.759	63.3045	0	0	0	0	1	0				x		x	x
1	129.52	0.546661	0.576584	2.55305	0.0810024	Ctrl	Mutant	59277	| hypothetical protein MIMGU_mgv1a008655mg [Erythranthe guttata]	24.3554	0	17.9732	0.91394	15.6657	0	39.856	0	31.7024	0.91394	20.4546	0	1	0	0	0	0	0		x	x	x		x	x
4	138.07	0.60302	0.597331	1.10376	0.0727311	Ctrl	Mutant	58923	| hypothetical protein MIMGU_mgv1a009315mg [Erythranthe guttata]	1386.32	2150.28	1552.49	1401.08	1400.13	1809.46	2268.62	937.421	2738.39	1401.08	1828.15	1426.77	2	1	2	2	2	1				x	x	x	x
1	60.24	0.204058	0.409487	1.60828	0.216869	Ctrl	Mutant	28853	| unknown [Glycine max]	604.419	1237.74	543.02	575.201	467.751	440.11	989.094	539.596	957.817	575.201	610.741	347.03	0	0	0	1	0	0			x	x		x	x
5	92.1	0.396588	0.537687	1.16613	0.114925	Ctrl	Mutant	313785	| hypothetical protein MIMGU_mgv1a013374mg [Erythranthe guttata]	1504.27	2162.27	1643.61	1211.51	1479.37	1862.76	2461.64	942.65	2899.11	1211.51	1931.61	1468.79	2	2	1	0	2	1				x	x	x	x
8	546.96	0.643034	0.610897	1.27541	0.0678886	Ctrl	Mutant	170480	| hypothetical protein POPTR_0003s13390g [Populus trichocarpa]	9869.48	22386.2	8565.32	12792.4	9412.78	9801.08	16150.8	9759.32	15108.1	12792.4	12290.2	7728.21	6	5	5	5	6	5				x	x	x	x
3	110.51	0.086169	0.26837	1.45353	0.409712	Ctrl	Mutant	30952	| unnamed protein product [Coffea canephora]	553.452	943.434	700.527	495.704	504.783	511.291	905.69	411.293	1235.64	495.704	659.094	403.156	2	1	4	2	2	1				x	x	x	x
2	227.24	0.299407	0.484788	1.24538	0.152878	Ctrl	Mutant	30590	| hypothetical protein MIMGU_mgv1a015303mg [Erythranthe guttata]	388.889	396.558	344.82	348.1	369.92	189.551	636.392	172.881	608.217	348.1	483.003	149.462	2	0	1	0	0	0				x	x	x	x
1	190.04	0.0204077	0.124764	1.4154	0.792614	Ctrl	Mutant	49715	| hypothetical protein MIMGU_mgv1a011200mg [Erythranthe guttata]	211.363	229.317	234.559	138.957	187.637	150.47	345.882	99.9714	413.731	138.957	244.997	118.647	0	0	0	0	1	0	x			x		x	x
1	147.79	0.260449	0.455834	1.3374	0.174513	Ctrl	Mutant	27684	| hypothetical protein MIMGU_mgv1a016086mg [Erythranthe guttata]	1112.59	1784.18	1038.57	1031.81	761.086	1149.63	1820.68	777.822	1831.9	1031.81	993.748	906.491	2	1	1	1	0	1				x		x	x
1	70.55	0.13976	0.348222	1.44594	0.293676	Ctrl	Mutant	79486	| _	478.656	409.778	654.124	259.827	400.771	406.221	783.291	178.644	1153.79	259.827	523.285	320.308	0	0	1	0	0	0				x		x	x
2	93.08	0.914851	0.669673	1.10893	0.0509207	Ctrl	Mutant	65764	| hypothetical protein A1O9_08575 [Exophiala aquamarina CBS 119918]	5578.66	10815.4	4326.52	6671.54	5239.25	6774.46	9129.12	4715.03	7631.41	6671.54	6840.87	5341.7	1	2	2	2	1	1				x	x	x	x
1	62.73	0.0239808	0.137404	2.98271	0.754165	Ctrl	Mutant	34770	| hypothetical protein MIMGU_mgv1a013054mg [Erythranthe guttata]	351.046	637.651	288.891	171.98	96.0265	160.324	574.464	277.986	509.566	171.98	125.382	126.417	1	0	0	0	0	0	x	x	x	x		x	x
2	73.28	0.297184	0.484788	1.27661	0.153987	Ctrl	Mutant	84976	| PREDICTED: uncharacterized protein LOC102592762 isoform X1 [Solanum tuberosum]	1196.61	2095.5	1735.32	1553.04	1257.98	1127.1	1958.17	913.54	3060.89	1553.04	1642.54	888.724	2	0	0	0	0	0				x	x	x	x
1	109.46	0.778137	0.640845	1.05803	0.0564653	Ctrl	Mutant	57623	| hypothetical protein MIMGU_mgv1a011714mg [Erythranthe guttata]	661.06	944.631	626.969	746.893	554.023	809.295	1081.78	411.815	1105.89	746.893	723.386	638.134	1	0	0	0	0	0				x		x	x
7	4032.71	0.818186	0.653229	1.09244	0.0542851	Ctrl	Mutant	151513	| rbcL gene product (chloroplast) [Boea hygrometrica]	78087.7	120735	60696.5	85646.6	83698.6	68214.1	127786	52634.7	107061	85646.6	109285	53787.2	11	10	13	10	13	13				x	x	x	x
3	54.68	0.439342	0.552037	1.13487	0.102997	Ctrl	Mutant	59859	| hypothetical protein MIMGU_mgv1a011159mg [Erythranthe guttata]	859.392	1161.03	850.429	774.44	723.575	1031.67	1406.34	506.157	1500.05	774.44	944.77	813.48	1	1	1	1	0	2				x	x	x	x
9	785.82	0.0595387	0.220851	1.85437	0.508547	Ctrl	Mutant	105000	| _	22588.5	40263.4	21131.5	15015.8	12845.9	17427.7	36964.7	17553	37273.3	15015.8	16772.9	13741.9	10	10	12	4	6	7			x	x	x	x	x
2	864.14	0.474694	0.552654	1.22267	0.0946607	Ctrl	Mutant	55247	| peroxidase [Nicotiana tabacum]	950.859	1609.06	834.665	932.751	874.663	968.957	1556.02	701.473	1472.24	932.751	1142.04	764.029	3	1	1	1	1	1				x	x	x	x
2	258.99	0.142299	0.352095	1.34187	0.289726	Ctrl	Mutant	50005	| 40S ribosomal protein S5 [Capsicum annuum]	603.748	881.519	772.453	439.962	590.3	652.256	987.995	384.301	1362.51	439.962	770.753	514.307	2	1	0	0	1	1				x	x	x	x
1	86.29	0.151311	0.365954	1.50559	0.27647	Ctrl	Mutant	40862	| hypothetical protein MIMGU_mgv1a012379mg [Erythranthe guttata]	590.857	406.08	333.025	370.466	295.113	217.77	966.9	177.032	587.412	370.466	385.328	171.713	1	0	2	0	0	0			x	x		x	x
4	67.83	0.0504247	0.193631	1.10548	0.554524	Ctrl	Mutant	108111	| Actin-related protein C1A isoform 1 [Theobroma cacao]	291.415	317.739	309.971	274.096	266.615	290.714	476.883	138.52	546.748	274.096	348.119	229.23	1	0	1	0	3	2				x	x	x	x
2	140.43	0.950522	0.682879	1.02475	0.0503097	Ctrl	Mutant	39416	| hypothetical protein CICLE_v10009497mg [Citrus clementina]	727.675	498.83	742.24	642.746	645.956	632.494	1190.79	217.467	1309.21	642.746	843.423	498.725	1	0	1	0	0	1				x	x	x	x
1	63.92	0.0081607	0.0813127	1.53134	0.94655	Ctrl	Mutant	102572	| PREDICTED: uncharacterized protein LOC100250522 isoform 2 [Vitis vinifera]	127.796	108.079	138.958	80.0883	76.0083	88.6775	209.13	47.1172	245.105	80.0883	99.2438	69.9227	1	0	1	0	0	0	x		x	x		x	x
5	432.58	0.528594	0.570874	1.18571	0.0840697	Ctrl	Mutant	41918	| hypothetical protein MIMGU_mgv1a014752mg [Erythranthe guttata]	1170.03	1161.96	1911.14	1091.89	1713.8	772.856	1914.68	506.559	3371.01	1091.89	2237.71	609.401	2	0	2	1	3	2				x	x	x	x
1	191.2	0.530007	0.570874	1.21075	0.0838217	Ctrl	Mutant	48030	| hypothetical protein MIMGU_mgv1a012555mg [Erythranthe guttata]	2457.23	4150.26	2374.51	3004.22	1371.23	3043.1	4021.1	1809.32	4188.32	3004.22	1790.41	2399.5	0	1	0	0	0	0				x		x	x
2	357.8	0.943292	0.67971	1.07923	0.0504071	Ctrl	Mutant	58279	| hypothetical protein MIMGU_mgv1a009751mg [Erythranthe guttata]	244.686	144.512	369.674	272.617	255.234	175.306	400.413	63.0005	652.057	272.617	333.259	138.23	1	0	1	0	1	0				x	x	x	x
3	214.46	0.904799	0.664525	1.00591	0.0511525	Ctrl	Mutant	64835	| hypothetical protein MIMGU_mgv1a009493mg [Erythranthe guttata]	1603.9	2451.11	1189.26	1530.32	1606.38	2076.74	2624.68	1068.57	2097.69	1530.32	2097.45	1637.53	2	0	1	0	1	0				x	x	x	x
4	448.77	0.0990455	0.287943	1.35205	0.374474	Ctrl	Mutant	126661	| hypothetical protein MIMGU_mgv1a007806mg [Erythranthe guttata]	5341.84	6551.57	5277.28	4605.04	4861.63	3233.1	8741.58	2856.18	9308.43	4605.04	6347.81	2549.32	3	2	4	2	5	4				x	x	x	x
3	847.99	0.83149	0.655642	1.06791	0.0536671	Ctrl	Mutant	47367	| hypothetical protein M569_02545 [Genlisea aurea]	4417.32	7362.06	4486.51	5143.06	4408.73	5679.7	7228.67	3209.52	7913.61	5143.06	5756.47	4478.47	3	3	5	4	5	3				x	x	x	x
3	167.66	0.658938	0.61176	1.38506	0.0661715	Ctrl	Mutant	138576	| hypothetical protein MIMGU_mgv1a014713mg [Erythranthe guttata]	2391.06	6841.89	1653.11	1538.07	1780.28	4541.28	3912.82	2982.75	2915.87	1538.07	2324.51	3580.82	2	0	1	1	2	1				x	x	x	x
2	57.97	0.0274449	0.146767	1.14513	0.720118	Ctrl	Mutant	48268	| hypothetical protein MIMGU_mgv1a011259mg [Erythranthe guttata]	286.643	314.246	289.084	245.515	268.325	263.342	469.073	136.997	509.907	245.515	350.351	207.647	1	1	2	1	2	1	x			x	x	x	x
2	156.18	0.34071	0.509279	1.07171	0.134486	Ctrl	Mutant	50417	| hypothetical protein EUGRSUZ_B00523 [Eucalyptus grandis]	16679.6	14390.8	14381.2	13042.8	14612.4	14755	27295.1	6273.7	25366.5	13042.8	19079.4	11634.4	1	0	1	0	0	0				x	x	x	x
3	59.98	0.314677	0.490396	2.29763	0.145609	Ctrl	Mutant	59732	| hypothetical protein MIMGU_mgv1a008920mg [Erythranthe guttata]	962.682	3886.55	691.152	215.272	381.405	1814.67	1575.37	1694.36	1219.1	215.272	498	1430.88	0	1	0	0	2	0		x	x	x	x	x	x
1	247.07	0.412743	0.543537	1.17803	0.110152	Ctrl	Mutant	79045	| hypothetical protein MIMGU_mgv1a004331mg [Erythranthe guttata]	506.234	809.722	518.637	517.344	524.495	515.499	828.42	353.001	914.808	517.344	684.831	406.474	0	1	0	0	1	1				x		x	x
1	469.24	0.623216	0.604061	1.94856	0.0701898	Ctrl	Mutant	54719	| malate dehydrogenase [Perilla frutescens]	580.632	8.43082	742.506	121.171	561.067	1.1213	950.167	3.67545	1309.68	121.171	732.584	0.884148	0	0	1	0	0	0			x	x		x	x
3	181.42	0.496379	0.557014	1.21067	0.09012	Ctrl	Mutant	74715	| hypothetical protein MIMGU_mgv1a000792mg [Erythranthe guttata]	1130.08	1755.19	893.359	1140.43	925.075	1055.61	1849.3	765.183	1575.77	1140.43	1207.87	832.355	4	1	0	2	2	0				x	x	x	x
1	91.34	0.049449	0.193631	1.30608	0.559957	Ctrl	Mutant	83816	| unnamed protein product [Coffea canephora]	252.891	286.002	258.49	194.827	239.615	176.075	413.841	124.683	455.943	194.827	312.865	138.837	2	0	1	2	2	1	x			x		x	x
3	143.04	0.47404	0.552654	1.10699	0.0948039	Ctrl	Mutant	81906	| PREDICTED: rac-like GTP-binding protein 7-like [Solanum lycopersicum]	446.716	440.379	557.539	409.543	361.192	534.277	731.022	191.985	983.426	409.543	471.608	421.281	0	1	1	1	0	2				x	x	x	x
2	730.09	0.97962	0.686538	1.00308	0.0500525	Ctrl	Mutant	61129	| hypothetical protein MIMGU_mgv1a011025mg [Erythranthe guttata]	718.105	953.92	715.973	884.422	759.013	737.234	1175.13	415.865	1262.88	884.422	991.042	581.314	1	0	1	0	0	1				x	x	x	x
1	436.01	0.672182	0.61176	1.54672	0.0648251	Ctrl	Mutant	55612	| unnamed protein product [Coffea canephora]	25.2004	2.84439	147.332	30.3627	36.7922	46.2317	41.2389	1.24002	259.875	30.3627	48.0395	36.454	0	0	1	0	0	0			x	x		x	x
5	1930.41	0.0403656	0.17768	1.32295	0.616344	Ctrl	Mutant	120985	| PREDICTED: 3-ketoacyl-CoA synthase 1-like [Vitis vinifera]	6161.79	7825.29	6038.96	4831.33	5442.35	4863.69	10083.4	3411.46	10651.9	4831.33	7106.06	3835.04	6	4	6	5	7	3	x			x	x	x	x
2	115.3	0.0227587	0.134168	1.77211	0.766922	Ctrl	Mutant	102202	| hypothetical protein CICLE_v10028639mg [Citrus clementina]	451.883	677.017	464.771	253.985	341.127	304.194	739.478	295.148	819.796	253.985	445.409	239.859	0	1	1	0	1	1	x		x	x	x	x	x
1	253.3	0.136824	0.342198	4.9319	0.298371	Ctrl	Mutant	77573	| MC2 [Petunia x hybrida]	28.9879	7.13899	55.6686	3.18826	0.752645	14.6717	47.4368	3.11227	98.1921	3.18826	0.982727	11.5687	0	0	1	0	0	0		x	x	x		x	x
3	96.88	0.69524	0.617639	1.26958	0.0626532	Ctrl	Mutant	29615	| unnamed protein product [Coffea canephora]	602.224	500.646	1503.82	474.688	1028.38	550.121	985.502	218.259	2652.54	474.688	1342.76	433.774	1	1	1	1	2	1				x	x	x	x
1	235.36	0.495226	0.557014	1.18466	0.0903514	Ctrl	Mutant	47281	| hypothetical protein PRUPE_ppa010094mg [Prunus persica]	167.491	93.211	134.756	92.4712	104.572	136.775	274.089	40.6357	237.693	92.4712	136.539	107.847	0	0	0	0	1	0				x		x	x
1	387.03	0.298952	0.484788	2.44869	0.153104	Ctrl	Mutant	162687	| ADP/ATP carrier 2 [Theobroma ADP/ATP carrier 2 [Theobroma cacao]	26.7942	118.51	41.4968	43.2615	31.7941	1.23071	43.847	51.6651	73.195	43.2615	41.5134	0.970423	0	0	1	0	0	0		x	x	x		x	x
2	258.94	0.455513	0.552654	1.11184	0.0990298	Ctrl	Mutant	45964	| hypothetical protein PFL1_04090 [Pseudozyma flocculosa PF-1]	540.227	598.525	706.419	484.429	491.816	683.316	884.047	260.929	1246.03	484.429	642.162	538.799	0	1	1	0	0	0				x	x	x	x
7	1210.09	0.328831	0.503873	1.08941	0.139377	Ctrl	Mutant	159713	| _	7542.85	7608.28	6817.15	7442.73	6899.02	5823.58	12343.4	3316.86	12024.6	7442.73	9008.03	4591.93	6	6	8	6	7	5				x	x	x	x
1	60	0.887511	0.659302	1.16503	0.0516137	Ctrl	Mutant	59524	| _	19.2897	25.5345	1.07138	17.6764	18.6516	3.06625	31.5664	11.1318	1.88977	17.6764	24.3533	2.41776	0	0	0	0	1	0				x		x	x
2	256.02	0.499871	0.557014	1.17828	0.0894256	Ctrl	Mutant	329763	| xylosyltransferase 1 [Nicotiana benthamiana]	568.157	945.606	640.271	504.125	493.373	830.622	929.753	412.24	1129.35	504.125	644.195	654.95	2	0	1	0	0	0				x	x	x	x
1	93.77	0.211009	0.415886	1.76205	0.210717	Ctrl	Mutant	109447	| hypothetical protein MIMGU_mgv1a012010mg [Erythranthe guttata]	1269.44	3215.73	1498.77	756.633	1147.19	1492.18	2077.35	1401.91	2643.63	756.633	1497.89	1176.59	0	0	1	0	0	0			x	x		x	x
9	307.53	0.304602	0.487206	1.39957	0.150337	Ctrl	Mutant	141294	| hypothetical protein MIMGU_mgv1a015683mg [Erythranthe guttata]	12303.2	23949.9	12137	11711.5	9248.81	13614.6	20133.4	10441.1	21408	11711.5	12076.1	10735.2	4	3	5	3	3	4				x	x	x	x
3	103.52	0.837939	0.656302	1.01987	0.053386	Ctrl	Mutant	199079	| hypothetical protein MIMGU_mgv1a011710mg [Erythranthe guttata]	344.726	384.064	429.555	346.867	355.131	433.785	564.123	167.434	757.678	346.867	463.694	342.042	1	0	2	2	3	1				x	x	x	x
3	76.38	0.172211	0.381562	1.59455	0.249662	Ctrl	Mutant	64419	| hypothetical protein MIMGU_mgv1a009491mg [Erythranthe guttata]	562.039	1167.94	743.15	633.618	550.257	367.113	919.741	509.166	1310.82	633.618	718.469	289.471	3	0	2	3	2	1			x	x	x	x	x
1	89.82	0.217154	0.422842	1.15102	0.205531	Ctrl	Mutant	75758	| hypothetical protein MIMGU_mgv1a005057mg [Erythranthe guttata]	807.761	1049.43	810.904	808.734	731.338	777.946	1321.85	457.503	1430.33	808.734	954.906	613.415	0	0	0	0	1	0				x		x	x
2	110.51	0.330602	0.503873	1.44775	0.138629	Ctrl	Mutant	47984	| hypothetical protein MIMGU_mgv1a011178mg [Erythranthe guttata]	1039.84	2029.69	881.768	1179.45	755.292	794.529	1701.64	884.852	1555.32	1179.45	986.183	626.491	1	1	2	1	0	1				x	x	x	x
2	107.59	0.447088	0.552654	1.87441	0.101062	Ctrl	Mutant	73571	| hypothetical protein MIMGU_mgv1a005324mg [Erythranthe guttata]	140.506	766.456	91.7574	29.5575	51.5012	451.759	229.929	334.139	161.848	29.5575	67.245	356.214	0	0	0	0	1	2			x	x	x	x	x
1	710.19	0.524155	0.570874	1.08184	0.0848577	Ctrl	Mutant	146463	| unnamed protein product [Coffea canephora]	183.973	156.975	182.404	150.882	133.324	199.553	301.06	68.4337	321.736	150.882	174.081	157.349	0	0	0	0	0	1				x		x	x
1	1651.43	0.527252	0.570874	1.07869	0.0843064	Ctrl	Mutant	39305	| Chlorophyll a-b binding protein 40 [Morus notabilis]	392.589	429.078	469.801	325.971	389.836	481.448	642.448	187.058	828.668	325.971	509.008	379.625	0	0	1	0	0	0				x		x	x
1	322.97	0.876531	0.656689	1.00621	0.0519481	Ctrl	Mutant	35235	| lipid transfer protein [Sesamum indicum]	3053.79	5540.43	3083.16	3721.02	3713.53	4170.8	4997.33	2415.37	5438.3	3721.02	4848.75	3288.7	1	2	1	2	1	2				x		x	x
1	96.38	0.16387	0.376049	1.62677	0.259767	Ctrl	Mutant	50229	| hypothetical protein MIMGU_mgv1a012151mg [Erythranthe guttata]	13.122	9.79243	8.31505	3.5337	5.70967	9.95386	21.4734	4.26904	14.6667	3.5337	7.4551	7.84868	0	0	1	0	0	0			x	x		x	x
3	107.97	0.0658639	0.233805	1.25549	0.480953	Ctrl	Mutant	67112	| unnamed protein product [Coffea canephora]	667.214	833.065	686.517	568.674	529.847	643.268	1091.85	363.178	1210.93	568.674	691.819	507.221	2	0	0	1	2	0				x	x	x	x
3	183.98	0.543055	0.576584	1.18065	0.0815971	Ctrl	Mutant	32124	| unnamed protein product [Vitis vinifera]	792.735	686.93	435.774	743.582	462.528	416.251	1297.26	299.47	768.649	743.582	603.922	328.216	3	2	2	2	2	2				x	x	x	x
5	794.01	0.7145	0.625676	1.075	0.0609977	Ctrl	Mutant	110286	| atpF gene product (chloroplast) [Boea hygrometrica]	11970.8	17400.9	11340.1	13211.2	12977.1	11683.1	19589.4	7586	20002.5	13211.2	16944.2	9212.21	3	5	4	3	5	3				x	x	x	x
1	430.36	0.0398307	0.176502	2.20119	0.620032	Ctrl	Mutant	55172	| hypothetical protein MIMGU_mgv1a001903mg [Erythranthe guttata]	278.941	592.953	419.713	225.451	149.649	211.678	456.469	258.5	740.318	225.451	195.396	166.909	1	1	0	0	0	0	x	x	x	x		x	x
1	482.23	0.314916	0.490396	1.3451	0.1455	Ctrl	Mutant	56247	| hypothetical protein MIMGU_mgv1a001903mg [Erythranthe guttata]	94.0605	145.276	70.6475	77.9803	65.4532	87.0209	153.924	63.3336	124.613	77.9803	85.462	68.6165	0	0	0	0	1	0				x		x	x
7	345.05	0.0173482	0.117451	1.33444	0.828356	Ctrl	Mutant	129122	| PREDICTED: endoplasmic reticulum metallopeptidase 1-like [Solanum tuberosum]	2549.47	2926.45	2753.35	1936.32	1910	2320.51	4172.05	1275.8	4856.55	1936.32	2493.88	1829.73	5	2	4	3	2	3	x			x	x	x	x
4	96.13	0.373411	0.525264	1.6423	0.122416	Ctrl	Mutant	46849	| hypothetical protein MIMGU_mgv1a015450mg [Erythranthe guttata]	3097.26	7262.97	2197.08	3458.56	2220.92	1966.7	5068.47	3166.32	3875.37	3458.56	2899.85	1550.75	1	0	1	2	2	0			x	x	x	x	x
3	194.01	0.554278	0.581765	1.13212	0.0797738	Ctrl	Mutant	74846	| hypothetical protein M569_06824 [Genlisea aurea]	294.18	219.313	364.217	281.14	278.763	215.378	481.408	95.6102	642.432	281.14	363.981	169.827	1	0	0	0	1	1				x	x	x	x
1	214.54	0.0126839	0.104685	1.70278	0.887427	Ctrl	Mutant	214914	| ATP synthase F1 [Colletotrichum graminicola M1.001]	149.587	122.989	171.649	100.459	81.9807	78.4425	244.789	53.6173	302.766	100.459	107.042	61.8523	1	0	0	0	0	0	x		x	x		x	x
1	364.43	0.118108	0.319602	1.35401	0.331964	Ctrl	Mutant	146348	| ribulose-phosphate 3-epimerase family protein [Populus trichocarpa]	717.883	825.341	1011.62	501.355	631.184	754.326	1174.77	359.81	1784.36	501.355	824.136	594.79	1	1	0	0	0	0				x		x	x
1	453.18	0.756329	0.640008	1.31768	0.0578642	Ctrl	Mutant	131370	| hypothetical protein MIMGU_mgv1a010534mg [Erythranthe guttata]	61.5997	1.51064	200.734	11.4055	91.0627	97.7653	100.804	0.658569	354.068	11.4055	118.9	77.0885	0	0	1	0	0	0				x		x	x
4	272.1	0.0158931	0.117124	1.25412	0.846248	Ctrl	Mutant	28169	| RNA-binding gricine-rich protein-1c [Nicotiana sylvestris]	858.716	898.218	847.36	715.617	620.42	740.557	1405.23	391.581	1494.63	715.617	810.08	583.934	3	1	2	2	2	0	x			x	x	x	x
1	76.34	0.359652	0.515111	1.3736	0.127263	Ctrl	Mutant	26161	| putative atp synthase subunit alpha protein [Togninia minima UCRPA7]	198.504	376.749	171.218	164.829	170.65	207.961	324.84	164.245	302.007	164.829	222.817	163.979	1	0	0	0	0	0				x		x	x
1	90.33	0.988088	0.686777	1.00316	0.0500179	Ctrl	Mutant	42391	| hypothetical protein MIMGU_mgv1a012873mg [Erythranthe guttata]	320.433	432.938	312.577	407.767	341.361	313.464	524.368	188.741	551.344	407.767	445.714	247.168	0	1	1	1	1	1				x		x	x
2	483.25	0.285441	0.475927	1.32727	0.160082	Ctrl	Mutant	213997	| NADH dehydrogenase subunit 4 (chloroplast) [Tectona grandis]	1785.61	2401.72	1368.77	1692.53	1498.31	995.274	2922.04	1047.04	2414.33	1692.53	1956.33	784.779	3	2	2	3	4	3				x	x	x	x
4	335.31	0.422759	0.545182	1.16869	0.10736	Ctrl	Mutant	72002	| hypothetical protein MIMGU_mgv1a011418mg [Erythranthe guttata]	3571.58	3244.94	4913.37	2717.8	4088.2	3230.8	5844.67	1414.64	8666.54	2717.8	5337.95	2547.51	1	0	3	1	1	1				x	x	x	x
2	139.94	0.469161	0.552654	1.15923	0.0958853	Ctrl	Mutant	95180	| hypothetical protein MIMGU_mgv1a009214mg [Erythranthe guttata]	183.02	130.237	212.094	179.405	136.398	137.387	299.5	56.7774	374.106	179.405	178.094	108.33	1	0	1	0	0	0				x	x	x	x
1	69.88	0.886029	0.659302	1.0337	0.051657	Ctrl	Mutant	50358	| hypothetical protein MIMGU_mgv1a011095mg [Erythranthe guttata]	63.0425	16.4646	79.8093	49.4954	91.7547	12.872	103.165	7.17779	140.773	49.4954	119.804	10.1497	0	0	1	0	1	0				x		x	x
1	521.64	0.866986	0.656689	1.23289	0.0522654	Ctrl	Mutant	57539	| hypothetical protein MIMGU_mgv1a012244mg [Erythranthe guttata]	131.939	31.9836	114.9	109.815	59.8242	56.5138	215.91	13.9434	202.669	109.815	78.1123	44.5615	0	0	1	0	0	0				x		x	x
1	129.05	0.115192	0.314285	1.41391	0.337855	Ctrl	Mutant	121757	| hypothetical protein MIMGU_mgv1a011321mg [Erythranthe guttata]	197.519	259.772	159.296	171.27	128.445	136.372	323.227	113.249	280.977	171.27	167.711	107.53	1	1	0	0	0	0				x		x	x
1	74.97	0.154452	0.368157	1.14072	0.27211	Ctrl	Mutant	71315	| Protochlorophyllide oxidoreductase A [Theobroma cacao]	811.749	941.554	1025.66	829.099	771.781	835.262	1328.38	410.474	1809.13	829.099	1007.71	658.609	0	0	0	1	0	0				x		x	x
4	200.2	0.0202943	0.124764	1.25663	0.793892	Ctrl	Mutant	36762	| RecName: Full=40S ribosomal protein S7 unknown [Avicennia marina]	1334.62	1429.26	1586.11	1077.24	1206.21	1178.19	2184.02	623.09	2797.7	1077.24	1574.95	929.011	4	2	5	2	2	1	x			x	x	x	x
2	823.06	0.567275	0.587073	1.11807	0.0777611	Ctrl	Mutant	70657	| unnamed protein product [Coffea canephora]	1059.55	1469.19	905.398	1034.11	944.396	1092.98	1733.89	640.499	1597	1034.11	1233.09	861.822	0	0	1	0	1	1				x	x	x	x
1	54.08	0.474537	0.552654	1.16183	0.0946949	Ctrl	Mutant	38465	| unnamed protein product [Coffea canephora]	881.03	1234.83	815.931	681.594	724.335	1117.49	1441.75	538.33	1439.2	681.594	945.762	881.146	1	1	1	1	1	1				x		x	x
1	752.85	0.968725	0.684223	1.30195	0.0501236	Ctrl	Mutant	54606	| hypothetical protein JCGZ_16190 [Jatropha curcas]	122.592	42.0484	255.167	110.083	115.458	96.9038	200.615	18.3311	450.081	110.083	150.754	76.4092	0	0	1	0	0	0				x		x	x
1	142.79	8.07484e-05	0.00592394	Infinity	1	Ctrl	Mutant	60381	| atpB gene product (chloroplast) [Boea hygrometrica]	69.5686	27.4651	53.5334	0	0	0	113.845	11.9735	94.426	0	0	0	1	0	0	0	0	0	x	x	x	x		x	x
5	1220.93	0.256708	0.455834	1.29505	0.176865	Ctrl	Mutant	90908	| atpB gene product (chloroplast) [Boea hygrometrica]	4307.3	7026.91	4266.32	4002.96	3566.99	4476.32	7048.62	3063.41	7525.24	4002.96	4657.41	3529.6	7	4	2	4	4	2				x	x	x	x
6	155.2	0.555098	0.581765	1.14562	0.0796438	Ctrl	Mutant	92838	| unnamed protein product [Coffea canephora]	9779.9	15762.5	9564.75	9411.2	9747.29	11486.3	16004.2	6871.72	16871	9411.2	12727	9057.01	2	0	3	4	1	1				x	x	x	x
2	89.57	0.0760669	0.254946	2.26129	0.442303	Ctrl	Mutant	117800	| beta-galactosidase [Camellia sinensis]	87.0584	61.3857	162.006	39.7645	59.4222	38.102	142.466	26.7613	285.757	39.7645	77.5874	30.0437	2	0	0	0	0	0		x	x	x	x	x	x
1	142.28	0.93837	0.677871	1.00573	0.050481	Ctrl	Mutant	464204	| putative A-type response regulator 3 [Populus x canadensis]	449.67	629.828	484.465	465.481	425.963	663.613	735.856	274.576	854.533	465.481	556.179	523.262	1	0	1	0	0	1				x		x	x
1	38.34	0.601222	0.597331	1.25014	0.0729675	Ctrl	Mutant	67565	| hypothetical protein MIMGU_mgv1a011155mg [Erythranthe guttata]	114.37	0	204.734	64.5501	158.096	32.6072	187.159	0	361.124	64.5501	206.426	25.7109	0	0	0	0	1	0				x		x	x
2	506.18	0.955322	0.683373	1.00641	0.0502524	Ctrl	Mutant	44585	| hypothetical protein MIMGU_mgv1a012953mg [Erythranthe guttata]	651.858	644.427	789.313	666.811	637.694	767.809	1066.72	280.94	1392.25	666.811	832.635	605.422	1	0	2	0	2	0				x	x	x	x
2	128.76	0.110415	0.308913	1.2184	0.347945	Ctrl	Mutant	49541	| hypothetical protein MIMGU_mgv1a012677mg [Erythranthe guttata]	443.133	555.496	408.754	379.739	381.672	393.7	725.159	242.17	720.988	379.739	498.348	310.435	0	1	0	0	0	1				x	x	x	x
1	45.83	0.292469	0.483564	1.87754	0.156386	Ctrl	Mutant	46666	| unnamed protein product [Coffea canephora]	2329.43	5662.57	1548.96	2238.41	1612.57	1230.64	3811.96	2468.62	2732.16	2238.41	2105.52	970.369	0	0	0	1	0	0			x	x		x	x
3	98.86	0.353781	0.511974	1.21147	0.129431	Ctrl	Mutant	40348	| Ribosomal protein S10p/S20e family protein isoform 1 [Theobroma cacao]	1015.11	1572.27	981.155	1005.91	870.582	1069.14	1661.17	685.439	1730.63	1005.91	1136.72	843.02	2	2	2	2	3	2				x	x	x	x
1	97.73	0.761822	0.640008	1.05748	0.0574973	Ctrl	Mutant	40413	| hypothetical protein MIMGU_mgv1a012117mg [Erythranthe guttata]	1220.84	1818.16	1339.19	1400.88	1097.96	1641.36	1997.83	792.634	2362.15	1400.88	1433.6	1294.23	0	1	0	0	0	0				x		x	x
3	83.02	0.727652	0.631986	1.05289	0.0599461	Ctrl	Mutant	107007	| Phototropic-responsive NPH3 family protein [Theobroma cacao]	4573.78	6292.7	4603.78	5174.71	4624.89	4893.48	7484.7	2743.33	8120.47	5174.71	6038.71	3858.54	6	4	4	4	3	2				x	x	x	x
1	126.19	0.016852	0.117124	2.77944	0.834395	Ctrl	Mutant	61255	| hypothetical protein MIMGU_mgv1a008397mg [Erythranthe guttata]	56.7975	76.2598	49.8689	26.6725	26.1541	12.9874	92.9455	33.2457	87.9623	26.6725	34.1493	10.2406	1	0	0	1	0	0	x	x	x	x		x	x
5	296.45	0.169732	0.381184	1.90428	0.25259	Ctrl	Mutant	99953	| hypothetical protein MIMGU_mgv1a007111mg [Erythranthe guttata]	4277.84	7167.11	2358.88	2599.44	2092.03	2557.36	7000.42	3124.53	4160.76	2599.44	2731.56	2016.5	2	0	0	0	3	1			x	x	x	x	x
3	57.2	0.00977246	0.0899767	2.8579	0.925803	Ctrl	Mutant	81383	| unnamed protein product [Coffea canephora]	2286.76	3744.03	2517.51	773.179	864.809	1353.12	3742.14	1632.22	4440.56	773.179	1129.18	1066.94	1	2	2	3	1	2	x	x	x	x	x	x	x
1	100.72	0.713891	0.625676	1.1295	0.0610479	Ctrl	Mutant	57413	| hypothetical protein MIMGU_mgv1a008911mg [Erythranthe guttata]	715.373	1329.25	738.937	855.377	698.1	910.935	1170.66	579.492	1303.39	855.377	911.508	718.278	0	1	0	0	0	0				x		x	x
2	109.2	0.869309	0.656689	1.01079	0.0521859	Ctrl	Mutant	85844	| hypothetical protein MIMGU_mgv1a015153mg [Erythranthe guttata]	1744.31	1860.1	2008.14	1725.24	1642.04	2185.37	2854.46	810.916	3542.09	1725.24	2144	1723.17	0	0	1	0	1	0				x	x	x	x
8	606.37	0.908053	0.666174	1.04383	0.0510746	Ctrl	Mutant	125917	| hypothetical protein MIMGU_mgv1a000979mg [Erythranthe guttata]	4670.29	8236.77	3162.63	5356.38	5146.22	4892.34	7642.64	3590.85	5578.47	5356.38	6719.4	3857.64	6	3	6	3	6	1				x	x	x	x
4	118.09	0.0482193	0.193631	1.27567	0.566963	Ctrl	Mutant	79378	| hypothetical protein MIMGU_mgv1a016080mg [Erythranthe guttata]	605.953	806.147	713.156	573.173	549.498	543.324	991.604	351.443	1257.91	573.173	717.478	428.414	2	1	2	2	3	0	x			x	x	x	x
3	120.13	0.262122	0.455834	1.39052	0.173478	Ctrl	Mutant	76279	| PREDICTED: 60S ribosomal protein L37-2-like [Solanum lycopersicum]	833.113	1066.08	671.365	364.579	613.042	871.011	1363.34	464.76	1184.2	364.579	800.447	686.797	0	1	1	1	0	1				x	x	x	x
3	108.65	0.0796152	0.260234	2.35179	0.430283	Ctrl	Mutant	65840	| hypothetical protein MIMGU_mgv1a007142mg [Erythranthe guttata]	1345.92	1547.05	559.838	556.014	504.662	407.486	2202.52	674.442	987.481	556.014	658.936	321.305	1	1	2	1	1	0		x	x	x	x	x	x
2	130.08	0.156864	0.369135	1.2495	0.268848	Ctrl	Mutant	109404	| hypothetical protein M569_13135 [Genlisea aurea]	885.507	1195.7	814.211	804.522	727.585	785.16	1449.08	521.268	1436.16	804.522	950.006	619.103	2	0	0	2	0	0				x	x	x	x
2	226.75	0.224318	0.429358	1.16177	0.199761	Ctrl	Mutant	48714	| unnamed protein product [Coffea canephora]	678.846	646.952	686.48	617.27	656.51	458.294	1110.89	282.041	1210.86	617.27	857.203	361.367	1	1	1	1	2	2				x	x	x	x
5	512.47	0.475766	0.552654	1.1896	0.0944266	Ctrl	Mutant	278272	| maturase K (chloroplast) [Primulina dryas]	4497.64	7166.65	3992.47	4454.4	4293.39	4413.54	7360.11	3124.33	7042.2	4454.4	5605.87	3480.11	4	4	3	4	3	4				x	x	x	x
2	243.23	0.686367	0.61687	1.08188	0.0634638	Ctrl	Mutant	124865	| rps4 gene product (chloroplast) [Boea hygrometrica]	565.354	883.363	711.046	547.41	529.558	919.335	925.167	385.105	1254.19	547.41	691.442	724.901	2	2	2	2	2	2				x	x	x	x
1	172.96	0.585593	0.590805	1.09675	0.0750946	Ctrl	Mutant	38147	| hypothetical protein MIMGU_mgv1a013525mg [Erythranthe guttata]	146.097	120.591	171.903	153.48	145.157	101.263	239.078	52.572	303.215	153.48	189.531	79.8466	0	0	1	1	0	0				x		x	x
6	485.25	0.68817	0.61687	1.1866	0.0632965	Ctrl	Mutant	93537	| hypothetical protein MIMGU_mgv1a002942mg [Erythranthe guttata]	1933.96	4213.56	1843.06	1665.54	1665.61	3402.86	3164.8	1836.92	3250.92	1665.54	2174.78	2683.17	3	3	4	6	4	4				x	x	x	x
6	143.34	0.335594	0.507889	1.30585	0.136557	Ctrl	Mutant	161735	| hypothetical protein MIMGU_mgv1a004733mg [Erythranthe guttata]	2308.22	4227.35	2654.96	2011.7	1976.33	3049.94	3777.25	1842.93	4683.01	2011.7	2580.49	2404.89	1	3	2	1	0	2				x	x	x	x
2	140.97	0.168063	0.380021	1.15327	0.254596	Ctrl	Mutant	49901	| hypothetical protein MIMGU_mgv1a011534mg [Erythranthe guttata]	546.448	636.122	559.083	441.919	500.087	568.184	894.228	277.32	986.149	441.919	652.962	448.017	0	0	1	0	1	0				x	x	x	x
2	58.94	0.43873	0.552037	1.19642	0.103152	Ctrl	Mutant	100386	| hypothetical protein JCGZ_23054 [Jatropha curcas]	358.35	586.3	348.801	395.325	326.712	359.067	586.417	255.599	615.239	395.325	426.587	283.126	1	1	0	1	1	0				x	x	x	x
2	252.33	0.133015	0.335967	1.14207	0.304676	Ctrl	Mutant	45920	| hypothetical protein M569_09096 [Genlisea aurea]	493.55	541.317	503.138	438.988	401.962	505.732	807.663	235.989	887.47	438.988	524.841	398.772	1	0	2	1	1	2				x	x	x	x
3	141.41	0.968739	0.684223	1.01612	0.0501235	Ctrl	Mutant	33254	| hypothetical protein MIMGU_mgv1a015764mg [Erythranthe guttata]	2767.55	3845.89	2761.32	3148.41	2854.34	3223.29	4528.92	1676.63	4870.6	3148.41	3726.9	2541.58	3	1	1	3	3	2				x	x	x	x
2	122.23	0.781798	0.642033	1.02584	0.0562454	Ctrl	Mutant	178778	| transaldolase [Exophiala aquamarina CBS 119918]	831.687	1041.36	888.622	944.597	841.873	905.636	1361	453.986	1567.41	944.597	1099.23	714.099	2	0	1	1	2	2				x	x	x	x
1	77.99	0.742651	0.640008	1.40373	0.0588219	Ctrl	Mutant	110370	| hypothetical protein MIMGU_mgv1a021687mg [Erythranthe guttata]	134.048	103.005	0.883543	151.993	17.4604	0.0493928	219.361	44.9055	1.55845	151.993	22.7981	0.0389465	1	0	0	0	0	0				x		x	x
3	81.07	0.0357924	0.173537	1.98282	0.649409	Ctrl	Mutant	73978	| PREDICTED: uncharacterized protein LOC103699152 [Phoenix dactylifera]	623.324	547.312	703.398	304.808	202.691	437.634	1020.03	238.603	1240.7	304.808	264.654	345.077	3	2	2	1	2	1	x		x	x	x	x	x
6	1330.56	0.863111	0.656689	1.0868	0.0524013	Ctrl	Mutant	31905	| Kunitz-type trypsin inhibitor B3 [Populus nigra]	109096	181919	89777.2	128268	112893	109218	178529	79308.4	158355	128268	147404	86118.9	7	8	9	8	8	8				x	x	x	x
1	1267.97	0.438724	0.552037	1.44385	0.103154	Ctrl	Mutant	34046	| hypothetical protein EUGRSUZ_K02326 [Eucalyptus grandis]	579.112	219.051	461.24	318.765	450.545	102.94	947.68	95.496	813.567	318.765	588.275	81.1691	1	0	2	0	1	0				x		x	x
2	1237.81	0.492599	0.556929	2.15204	0.0908828	Ctrl	Mutant	196072	| unnamed protein product [Coffea canephora]	17451.2	93869.9	17094	18531.6	17776	23363.8	28557.9	40922.9	30151.6	18531.6	23210.1	18422.5	3	2	3	3	4	3		x	x	x	x	x	x
1	237.15	0.958366	0.683373	1.1528	0.0502192	Ctrl	Mutant	161218	| _	59.8453	112.282	18.1717	90.7093	23.9159	50.4499	97.9331	48.9496	32.0526	90.7093	31.2269	39.7801	0	0	0	0	0	1				x		x	x
3	60.77	0.446147	0.552654	1.13464	0.101294	Ctrl	Mutant	44211	| PREDICTED: proteasome subunit beta type-4-like [Solanum tuberosum]	314.215	248.014	382.888	268.74	303.319	260.911	514.193	108.123	675.365	268.74	396.043	205.73	1	0	3	1	1	1				x	x	x	x
1	73.36	0.0614919	0.225561	2.60386	0.499689	Ctrl	Mutant	94993	| unnamed protein product [Coffea canephora]	84.2699	91.5413	56.9396	50.8389	12.9028	25.6452	137.902	39.9078	100.434	50.8389	16.8472	20.2214	0	0	1	0	0	0		x	x	x		x	x
3	77.24	0.22736	0.429358	1.26576	0.197396	Ctrl	Mutant	42605	| PREDICTED: legumin B-like [Prunus mume]	700.968	1020.14	629.068	655.411	579.646	621.674	1147.09	444.735	1109.59	655.411	756.842	490.194	1	0	1	2	1	0				x	x	x	x
1	55.33	0.801427	0.650867	1.08319	0.0551379	Ctrl	Mutant	78760	| hypothetical protein MIMGU_mgv1a003528mg [Erythranthe guttata]	2463.72	4314.57	2592.97	2662.3	2658.55	3330.67	4031.73	1880.95	4573.66	2662.3	3471.26	2626.25	1	0	0	0	0	0				x		x	x
3	134.45	0.579306	0.589395	1.14334	0.0759881	Ctrl	Mutant	46323	| hypothetical protein MIMGU_mgv1a013348mg [Erythranthe guttata]	1445.5	2391.69	1432.8	1664.06	1400.29	1544.96	2365.48	1042.67	2527.27	1664.06	1828.35	1218.21	0	0	1	2	1	0				x	x	x	x
2	162.86	0.0234074	0.136771	1.18397	0.760101	Ctrl	Mutant	247717	| hypothetical protein MIMGU_mgv1a023175mg [Erythranthe guttata]	237.713	232.301	263.634	202.526	217.508	199.62	389.002	101.273	465.016	202.526	283.999	157.401	1	0	2	1	1	1	x			x	x	x	x
2	105.76	0.218344	0.422842	1.33028	0.204552	Ctrl	Mutant	82159	| chloroplast monodehydroascorbate reductase [Avicennia marina]	658.257	1146.12	852.769	760.993	559.978	676.464	1077.2	499.656	1504.17	760.993	731.161	533.396	0	1	0	0	0	1				x	x	x	x
4	325.23	0.917028	0.669781	1.00954	0.050874	Ctrl	Mutant	76989	| mitochondrial processing peptidase [Avicennia marina]	1234.22	1808.71	994.892	1424.09	1340.68	1234.88	2019.73	788.512	1754.86	1424.09	1750.53	973.712	1	0	2	1	4	1				x	x	x	x
1	77.78	0.160023	0.372797	2.73635	0.264683	Ctrl	Mutant	108620	| glycosyltransferase [Panax notoginseng]	161.168	48.3475	213.133	31.6718	75.7466	47.0387	263.742	21.0773	375.938	31.6718	98.9022	37.0903	0	0	1	0	0	0		x	x	x		x	x
2	73.93	0.23614	0.437964	1.4702	0.190837	Ctrl	Mutant	43025	| PREDICTED: nucleolin-like [Solanum tuberosum]	416.968	696.282	510.573	344.917	210.581	548.992	682.341	303.547	900.584	344.917	274.955	432.884	0	0	2	0	0	0				x	x	x	x
2	658.5	0.848201	0.656689	1.09635	0.0529631	Ctrl	Mutant	79307	| hypothetical protein MIMGU_mgv1a005623mg [Erythranthe guttata]	480.386	718.582	313.792	401.457	380.691	597.668	786.121	313.268	553.488	401.457	497.067	471.264	1	0	1	0	0	0				x	x	x	x
5	94.44	0.529845	0.570874	1.07991	0.08385	Ctrl	Mutant	66719	| 3-ketoacyl-CoA thiolase 1 [Rehmannia glutinosa]	1083.48	1455.31	1119.28	1125.95	1055.47	1205.96	1773.05	634.449	1974.27	1125.95	1378.13	950.908	3	0	1	4	2	1				x	x	x	x
2	64.21	0.204661	0.409487	1.04128	0.216323	Ctrl	Mutant	67170	| PREDICTED: uncharacterized protein LOC100257917 [Vitis vinifera]	596.562	599.938	589.891	556.366	602.822	556.379	976.237	261.545	1040.49	556.366	787.103	438.708	2	0	2	0	0	0				x	x	x	x
1	42.31	0.875723	0.656689	1.04494	0.0519741	Ctrl	Mutant	60695	| PREDICTED: uncharacterized protein LOC102601654 [Solanum tuberosum]	792.887	1061.27	1525.56	859.426	868.588	1506.34	1297.51	462.665	2690.89	859.426	1134.11	1187.76	0	1	2	1	1	2				x		x	x
5	258.62	0.742739	0.640008	1.03677	0.0588156	Ctrl	Mutant	57227	| PREDICTED: UDP-D-apiose/UDP-D-xylose synthase 2-like [Glycine max]	2374.7	2953.12	2479.24	2319.63	2208.02	3002.49	3886.04	1287.42	4373.06	2319.63	2883.01	2367.48	2	0	2	0	1	0				x	x	x	x
4	104.33	0.997038	0.687172	1.01851	0.0500011	Ctrl	Mutant	48875	| hypothetical protein MIMGU_mgv1a012212mg [Erythranthe guttata]	706.744	560.677	1008.16	709.068	623.041	902.114	1156.54	244.429	1778.27	709.068	813.502	711.322	0	0	1	1	2	1				x	x	x	x
1	305.35	0.895104	0.661821	1.56407	0.0514014	Ctrl	Mutant	46496	| actin [Prunella vulgaris]	791.694	74.0561	1478.52	116.857	783.219	598.753	1295.56	32.285	2607.92	116.857	1022.65	472.12	0	0	1	0	0	0			x	x		x	x
1	949.62	0.583167	0.590805	13.8548	0.0754367	Ctrl	Mutant	80949	| FtsH-like protein Pftf precursor [Nicotiana tabacum]	5.57712	0	134.882	0.314183	5.50875	4.31501	9.12661	0	237.914	0.314183	7.19276	3.40241	0	0	1	0	0	0		x	x	x		x	x
1	765.16	0.663288	0.61176	1.60568	0.0657211	Ctrl	Mutant	79180	| hypothetical protein EUGRSUZ_A01933 [Eucalyptus grandis]	83.0083	16.0859	152.156	55.9123	89.4837	11.0799	135.838	7.0127	268.384	55.9123	116.839	8.73654	0	0	1	0	0	0			x	x		x	x
2	191.54	0.201937	0.409487	1.103	0.218809	Ctrl	Mutant	424060	| hypothetical protein JCGZ_15927 [Jatropha curcas]	2342.22	2603.57	2353.74	2046.63	2454.27	2116.98	3832.89	1135.04	4151.7	2046.63	3204.53	1669.25	2	0	0	0	0	1				x	x	x	x
2	68.52	0.649152	0.61176	1.27898	0.0672147	Ctrl	Mutant	87777	| unnamed protein product [Coffea canephora]	1208.83	2870.28	1112.33	1287.93	1235.53	1535.56	1978.17	1251.31	1962	1287.93	1613.23	1210.8	0	2	1	1	1	1				x	x	x	x
3	110.48	0.564384	0.585936	1.21325	0.0781999	Ctrl	Mutant	90110	| hypothetical protein MIMGU_mgv1a003293mg [Erythranthe guttata]	4475.92	8751	4543.76	4792.87	4173.17	5681.18	7324.56	3815.03	8014.6	4792.87	5448.89	4479.64	1	1	1	3	0	1				x	x	x	x
2	63.87	0.762476	0.640008	1.2469	0.0574542	Ctrl	Mutant	24568	| _	7863.16	13524.5	2572.76	8355.18	9059.54	1801.28	12867.6	5896.07	4538.02	8355.18	11829	1420.32	1	0	0	1	0	0				x	x	x	x
3	102.71	0.43978	0.552037	1.51829	0.102886	Ctrl	Mutant	134588	| hypothetical protein MIMGU_mgv1a003318mg [Erythranthe guttata]	1176.32	2428.9	749.989	884.496	683.794	1300.2	1924.97	1058.89	1322.88	884.496	892.827	1025.21	3	1	1	0	1	0			x	x	x	x	x
2	87.67	0.585762	0.590805	1.17554	0.0750708	Ctrl	Mutant	69647	| DEAD/DEAH box RNA helicase family protein isoform 1 [Theobroma cacao]	2088.32	3847.21	2197.44	2522.17	1822.58	2573.76	3417.4	1677.2	3875.99	2522.17	2379.73	2029.43	0	2	1	1	1	1				x	x	x	x
3	223.97	0.75427	0.640008	1.02693	0.0580043	Ctrl	Mutant	142958	| hypothetical protein CISIN_1g001813mg [Citrus sinensis]	318.081	336.642	271.957	284.694	311.944	305.744	520.519	146.76	479.696	284.694	407.305	241.081	1	0	1	1	1	1				x	x	x	x
1	80.85	0.773145	0.640008	1.2986	0.0567719	Ctrl	Mutant	34005	| elongation factor 1-alpha [Exophiala aquamarina CBS 119918]	893.921	333.506	1334.6	565.394	865.559	541.961	1462.85	145.393	2354.06	565.394	1130.16	427.339	0	0	0	1	0	0				x		x	x
1	219.3	0.853962	0.656689	1.04337	0.0527387	Ctrl	Mutant	37947	| elongation factor 1-alpha [Pyrenophora tritici-repentis Pt-1C-BFP]	57.7602	78.2674	23.4484	89.2064	44.7153	18.9249	94.5209	34.121	41.3599	89.2064	58.3846	14.9224	1	0	0	1	0	0				x		x	x
2	68.05	0.64854	0.61176	1.05172	0.0672814	Ctrl	Mutant	14216	| _	164.581	143.823	163.584	146.171	182.36	120.245	269.327	62.7001	288.541	146.171	238.106	94.8143	3	1	1	1	1	1				x	x	x	x
3	287.45	0.990875	0.687039	1.04666	0.0500105	Ctrl	Mutant	62874	| unnamed protein product [Coffea canephora]	5497.52	10258.1	5306.4	6601.95	5894.12	7626.89	8996.35	4472.04	9359.79	6601.95	7695.93	6013.85	0	0	0	3	1	0				x	x	x	x
2	111.5	0.902708	0.66391	1.00662	0.0512041	Ctrl	Mutant	174625	| unnamed protein product [Coffea canephora]	1200.78	2138.49	329.339	2380.3	1013.4	250.772	1965.01	932.283	580.911	2380.3	1323.2	197.735	2	0	0	0	0	0				x	x	x	x
1	801.29	0.188022	0.393449	1.33933	0.232347	Ctrl	Mutant	80014	| PREDICTED: V-type proton ATPase subunit B2-like isoform X1 [Solanum tuberosum]	802.223	1298.51	1265.3	751.725	798.303	963.198	1312.79	566.092	2231.82	751.725	1042.34	759.487	1	0	1	1	1	0				x		x	x
1	57.09	0.403366	0.539127	1.62824	0.112881	Ctrl	Mutant	60186	| hypothetical protein MIMGU_mgv1a008029mg [Erythranthe guttata]	29.195	8.80345	26.4495	10.0986	18.9621	10.5206	47.7758	3.8379	46.6535	10.0986	24.7588	8.29559	1	0	1	0	0	0			x	x		x	x
3	972.55	0.398458	0.538013	1.12365	0.114355	Ctrl	Mutant	139220	| hypothetical protein MIMGU_mgv1a006001mg [Erythranthe guttata]	632.304	642.772	591.634	667.78	578.426	415.083	1034.73	280.219	1043.56	667.78	755.249	327.295	1	1	1	1	1	0				x	x	x	x
2	277.11	0.480559	0.554714	1.25855	0.0933925	Ctrl	Mutant	25537	| PREDICTED: histone H3-like [Poecilia reticulata]	344.483	295.562	565.923	424.509	350.551	183.163	563.724	128.851	998.215	424.509	457.714	144.425	0	0	1	1	0	0				x	x	x	x
1	60.5	0.0914172	0.277533	1.39988	0.394592	Ctrl	Mutant	34339	| PREDICTED: cysteine proteinase RD21a-like [Solanum lycopersicum]	529.287	771.03	501.716	440.631	387.179	459.464	866.145	336.133	884.962	440.631	505.538	362.29	1	0	0	1	0	0				x		x	x
6	505.07	0.972928	0.685583	1.02828	0.0500926	Ctrl	Mutant	59601	| _	4178.78	5631.96	2783.5	4643.86	3678.19	3925.85	6838.31	2455.27	4909.72	4643.86	4802.6	3095.56	9	3	4	6	5	6				x	x	x	x
2	209.92	0.181988	0.391402	1.55795	0.238693	Ctrl	Mutant	9045	| enolase [Phytolacca americana]	2565.18	4517.32	2179.15	2039.64	1553.28	2351.83	4197.76	1969.34	3843.73	2039.64	2028.11	1854.43	0	0	1	2	1	1			x	x	x	x	x
3	166.83	0.460039	0.552654	1.1152	0.097967	Ctrl	Mutant	60132	| hypothetical protein MIMGU_mgv1a009305mg [Erythranthe guttata]	1709.54	2411.68	1778.27	1752.35	1596.53	1941.2	2797.56	1051.38	3136.63	1752.35	2084.59	1530.65	0	0	0	0	1	2				x	x	x	x
1	47.19	0.477738	0.552654	4.72446	0.0939985	Ctrl	Mutant	40037	| hypothetical protein MIMGU_mgv1a021287mg [Erythranthe guttata]	4.75168	0.75497	57.6968	0.818024	0.261329	12.2986	7.77583	0.329132	101.77	0.818024	0.341217	9.69748	0	0	1	0	0	0		x	x	x		x	x
5	368.2	0.924602	0.671724	1.03207	0.050721	Ctrl	Mutant	48430	| unnamed protein product [Coffea canephora]	3993.25	4121.23	2686.51	3355.04	3630.12	3480.21	6534.69	1796.66	4738.66	3355.04	4739.84	2744.16	2	2	3	4	6	1				x	x	x	x
3	320.72	0.22755	0.429358	1.53072	0.19725	Ctrl	Mutant	135840	| Gag-protease-integrase-RT-RNaseH polyprotein [Glycine max]	3310.86	6620.05	3173.57	2224.02	3125.59	3211.38	5418.02	2886.04	5597.76	2224.02	4081.07	2532.19	3	2	4	2	1	2			x	x	x	x	x
3	79.73	0.311033	0.488963	1.5749	0.14729	Ctrl	Mutant	67132	| hypothetical protein MIMGU_mgv1a005446mg [Erythranthe guttata]	1784.36	4044.55	1529.29	1814.22	1546.66	1311.29	2920	1763.24	2697.47	1814.22	2019.46	1033.96	0	0	0	1	2	0			x	x	x	x	x
1	332.01	0.0373525	0.173537	2.03198	0.637727	Ctrl	Mutant	13362	| polyphenol oxidase [Sesamum indicum]	6534.02	11577.4	5823.21	4187.7	3652.99	3938.26	10692.5	5047.19	10271.4	4187.7	4769.7	3105.34	2	2	1	1	2	1	x	x	x	x		x	x
5	253.38	0.957599	0.683373	1.00348	0.0502273	Ctrl	Mutant	61737	| hypothetical protein MIMGU_mgv1a006668mg [Erythranthe guttata]	1948.71	2030.65	1788.38	1947.19	1871.66	1928.91	3188.95	885.269	3154.47	1947.19	2443.82	1520.96	2	0	2	2	3	0				x	x	x	x
1	211.98	0.899621	0.662934	1.00582	0.0512824	Ctrl	Mutant	10338	| hypothetical protein JCGZ_08645 [Jatropha curcas]	2186.82	2409.16	2276.1	2175.28	2182.75	2474.3	3578.59	1050.28	4014.75	2175.28	2850.01	1951	3	2	3	3	2	3				x		x	x
5	214.69	0.408968	0.543149	1.33137	0.111237	Ctrl	Mutant	64016	| hypothetical protein MIMGU_mgv1a007210mg [Erythranthe guttata]	1981.11	3975.57	1926.37	1974.72	1645.33	2300.95	3241.96	1733.16	3397.87	1974.72	2148.3	1814.31	2	1	1	1	3	1				x	x	x	x
2	74.62	0.344901	0.510393	1.60541	0.13283	Ctrl	Mutant	9605	| hypothetical protein MIMGU_mgv1a016408mg [Erythranthe guttata]	250.542	368.729	132.178	231.196	170.29	66.5868	409.996	160.749	233.145	231.196	222.347	52.504	2	2	0	2	2	0			x	x	x	x	x
1	130.82	0.233262	0.434202	1.25701	0.192944	Ctrl	Mutant	33535	| hypothetical protein MIMGU_mgv1a011597mg [Erythranthe guttata]	89.1326	96.287	108.357	91.0271	53.8463	88.8381	145.86	41.9767	191.128	91.0271	70.3069	70.0494	0	0	1	0	0	0				x		x	x
1	98.74	0.995302	0.687172	1.0033	0.0500028	Ctrl	Mutant	60708	| PREDICTED: serine carboxypeptidase-like 14 [Prunus mume]	381.008	475.175	386.299	434.343	372.511	431.546	623.496	207.154	681.381	434.343	486.386	340.277	2	0	0	2	1	1				x		x	x
2	284.25	0.467783	0.552654	1.11022	0.0961947	Ctrl	Mutant	29899	| _	1837.05	2390.71	2066.25	1716.4	2355.01	1597.76	3006.21	1042.24	3644.6	1716.4	3074.93	1259.85	5	2	3	3	3	2				x	x	x	x
1	47.16	0.0880464	0.27293	1.48919	0.404174	Ctrl	Mutant	48956	| PREDICTED: uncharacterized protein LOC102591966 isoform X1 [Solanum tuberosum]	47.4456	65.4174	42.6798	42.5706	33.8437	28.0333	77.6417	28.519	75.2816	42.5706	44.1896	22.1044	1	0	1	0	1	0				x		x	x
7	171.25	0.503075	0.558892	1.31037	0.0887969	Ctrl	Mutant	66083	| hypothetical protein MIMGU_mgv1a007036mg [Erythranthe guttata]	3579.57	7057.28	2979.76	3036.73	2890.92	4463.79	5857.75	3076.64	5255.9	3036.73	3774.67	3519.73	3	2	5	1	0	2				x	x	x	x
3	168.9	0.00145498	0.0294737	3.33335	0.999802	Ctrl	Mutant	52614	| hypothetical protein MIMGU_mgv1a022460mg [Erythranthe guttata]	3798.02	3235.46	3670.7	940.272	1404.33	866.631	6215.21	1410.51	6474.64	940.272	1833.64	683.343	1	2	1	0	1	0	x	x	x	x	x	x	x
2	171.48	0.812382	0.651748	1.1714	0.0545709	Ctrl	Mutant	101791	| Ras-related protein-like protein [Acremonium chrysogenum ATCC 11550]	7571.67	16647.4	6276.65	8871.44	6493.48	10668.7	12390.6	7257.48	11071.2	8871.44	8478.52	8412.3	0	1	0	0	0	2				x	x	x	x
3	123.9	0.0513609	0.196022	4.28755	0.549412	Ctrl	Mutant	22022	| _	3619.31	13953.5	4448.08	1266.15	1273.36	2596.5	5922.77	6083.09	7845.83	1266.15	1662.63	2047.36	4	2	4	1	3	1		x	x	x	x	x	x
1	65.09	0.128158	0.329928	1.2806	0.313087	Ctrl	Mutant	36367	| glyceraldehyde-3-phosphate dehydrogenase [Escherichia coli]	392.465	485.344	378.195	364.417	261.604	354.776	642.244	211.588	667.088	364.417	341.575	279.743	0	0	1	0	0	0				x		x	x
2	154.61	0.300414	0.484788	1.22173	0.15238	Ctrl	Mutant	43760	| hypothetical protein MIMGU_mgv1a011087mg [Erythranthe guttata]	1094.68	1690.61	1120.61	1057.62	954.364	1185.04	1791.37	737.026	1976.61	1057.62	1246.11	934.414	1	2	2	1	1	2				x	x	x	x
1	53.61	0.304954	0.487206	1.23472	0.150167	Ctrl	Mutant	78428	| _	9.43214	14.7374	6.27356	0.0904119	0.738838	23.8267	15.4351	6.42483	11.0657	0.0904119	0.964699	18.7875	0	0	0	0	0	1				x		x	x
1	43.13	0.474088	0.552654	1.31802	0.0947934	Ctrl	Mutant	7718	| serine hydroxymethyltransferase [Verticillium alfalfae VaMs.102]	155.722	65.0692	90.3864	88.1214	89.1858	58.787	254.829	28.3671	159.43	88.1214	116.45	46.3539	1	0	0	0	0	0				x		x	x
1	112.78	0.00680198	0.0801984	3.07694	0.963017	Ctrl	Mutant	33356	| PREDICTED: uncharacterized protein LOC102627842 [Citrus sinensis]	245.061	369.773	284.666	106.267	65.3438	120.725	401.027	161.204	502.113	106.267	85.3193	95.1926	1	1	1	0	0	0	x	x	x	x		x	x
1	148.11	0.855041	0.656689	1.06392	0.0526977	Ctrl	Mutant	35694	| hypothetical protein MIMGU_mgv1a014412mg [Erythranthe guttata]	509.871	829.788	451.736	698.922	553.596	431.249	834.371	361.749	796.804	698.922	722.828	340.042	1	0	0	1	1	0				x		x	x
3	260.44	0.91674	0.669781	1.09145	0.0508801	Ctrl	Mutant	43612	| hypothetical protein MIMGU_mgv1a016788mg [Erythranthe guttata]	1579.55	3561.46	3382.77	2245.44	2733.85	2830.31	2584.83	1552.63	5966.77	2245.44	3569.58	2231.72	2	0	2	1	1	2				x	x	x	x
3	549.59	0.0161674	0.117124	2.56189	0.842833	Ctrl	Mutant	19763	| _	2730.31	4790.79	2391.5	1370.43	1112.05	1386.77	4467.97	2088.56	4218.3	1370.43	1452	1093.48	4	2	0	2	3	1	x	x	x	x	x	x	x
2	55.15	0.415721	0.543537	1.5047	0.109309	Ctrl	Mutant	41632	| hypothetical protein MIMGU_mgv1a013273mg [Erythranthe guttata]	85.2673	184.457	250.856	120.272	60.6432	165.055	139.535	80.4146	442.477	120.272	79.1817	130.147	0	0	2	0	0	0			x	x	x	x	x
2	330.45	0.0150304	0.116754	1.6309	0.857106	Ctrl	Mutant	50737	| hypothetical protein MIMGU_mgv1a013550mg [Erythranthe guttata]	1000.3	1301.38	1093.53	660.303	600.858	820.637	1636.93	567.341	1928.85	660.303	784.538	647.077	2	1	2	1	0	1	x		x	x	x	x	x
1	32.67	0.00118985	0.0280577	29.5703	0.999932	Ctrl	Mutant	31512	| hypothetical protein PFL1_06686 [Pseudozyma flocculosa PF-1]	256.967	656.265	267.313	13.292	7.54319	19.0882	420.51	286.101	471.506	13.292	9.84913	15.0512	1	0	0	0	0	0	x	x	x	x		x	x
1	134.1	0.612333	0.599544	1.09587	0.0715338	Ctrl	Mutant	22413	| hypothetical protein MIMGU_mgv1a024330mg [Erythranthe guttata]	907.945	1244.97	851.832	934.374	726.625	1080.89	1485.79	542.749	1502.52	934.374	948.752	852.286	1	0	0	0	0	0				x		x	x
2	40.57	0.48612	0.556929	1.15509	0.0922179	Ctrl	Mutant	11971	| _	1052.86	1764.67	1286.62	1121.33	1089.36	1342.42	1722.93	769.315	2269.43	1121.33	1422.37	1058.51	0	1	0	1	1	0				x	x	x	x
13	926.48	0.062353	0.226206	1.85895	0.495882	Ctrl	Mutant	165704	| Thylakoid lumenal 16.5 kDa protein [Theobroma cacao]	14040.5	23761.1	15915.2	8539.7	7056.83	13299.7	22976.4	10358.7	28072.4	8539.7	9214.08	10486.9	16	11	16	6	12	15			x	x	x	x	x
2	999.51	0.83688	0.656251	1.10689	0.0534313	Ctrl	Mutant	78443	| glyceraldehyde-3-phosphate dehydrogenase B [Scoparia dulcis]	164.208	19.3328	356.69	59.7937	117.347	310.922	268.716	8.42819	629.155	59.7937	153.22	245.163	1	0	1	0	0	0				x	x	x	x
5	374.19	0.625291	0.604061	1.1268	0.0699401	Ctrl	Mutant	57087	| glutamine synthetase cytosolic isozyme-like [Cucumis sativus]	4020.98	5120.75	2851.54	3582.81	3852.9	3207.93	6580.08	2232.41	5029.74	3582.81	5030.72	2529.47	4	0	3	4	4	1				x	x	x	x
2	129.23	0.0791765	0.260087	2.39412	0.431734	Ctrl	Mutant	90415	| hypothetical protein PFL1_03711 [Pseudozyma flocculosa PF-1]	369.691	953.302	388.422	249.866	179.684	285.291	604.976	415.595	685.126	249.866	234.613	224.954	1	0	0	0	1	0		x	x	x	x	x	x
3	170.36	0.063255	0.228225	1.21421	0.491957	Ctrl	Mutant	25616	| hypothetical protein MIMGU_mgv1a012403mg [Erythranthe guttata]	1871.95	2121.39	2119.55	1609.31	1528.88	1896.27	3063.32	924.825	3738.61	1609.31	1996.25	1495.22	4	3	3	3	3	2				x	x	x	x
2	45.38	0.370913	0.524077	1.14255	0.123273	Ctrl	Mutant	8936	| _	433.315	574.251	632.122	447.629	466.458	521.022	709.092	250.347	1114.98	447.629	609.053	410.829	0	1	2	0	0	0				x	x	x	x
3	77.89	0.782882	0.642125	1.13115	0.0561811	Ctrl	Mutant	9763	| atp4 gene product (mitochondrion) [Boea hygrometrica]	99.5573	38.9519	97.8648	53.4873	111.691	43.7892	162.919	16.9812	172.621	53.4873	145.835	34.528	2	0	2	0	4	0				x	x	x	x
1	254.78	0.65343	0.61176	1.11093	0.0667536	Ctrl	Mutant	33307	cdna_Contig75|	499.695	847.745	563.19	628.019	561.837	529.995	817.719	369.577	993.393	628.019	733.589	417.904	0	0	0	1	0	0				x		x	x
1	82.61	0.768795	0.640008	1.2468	0.0570456	Ctrl	Mutant	28687	cdna_Contig122|	32.8899	19.9152	64.8641	31.8336	26.7044	35.8392	53.8223	8.6821	114.412	31.8336	34.8678	28.2594	0	0	0	0	1	0				x		x	x
2	130.31	0.292951	0.483564	3.74878	0.156138	Ctrl	Mutant	34125	cdna_Contig129|	175.495	22.0235	257.734	22.2179	63.3825	35.8397	287.186	9.60122	454.609	22.2179	82.7584	28.2598	1	0	2	0	0	0		x	x	x	x	x	x
1	625.66	0.477937	0.552654	1.44518	0.0939556	Ctrl	Mutant	43986	cdna_Contig248|	150.936	36.9361	158.915	73.261	161.859	4.84109	246.997	16.1024	280.305	73.261	211.338	3.81723	0	0	0	0	1	0				x		x	x
5	143.35	0.492534	0.556929	1.76319	0.090896	Ctrl	Mutant	35438	cdna_Contig254|	2119.5	6755.15	1356.8	1141.1	1465.47	3196.24	3468.43	2944.93	2393.22	1141.1	1913.46	2520.26	2	1	1	3	2	3			x	x	x	x	x
3	62.86	0.0393226	0.175731	1.2209	0.623578	Ctrl	Mutant	32378	cdna_Contig391|	2112.47	2406.67	2212.84	1983.46	1650.03	1880.47	3456.93	1049.2	3903.15	1983.46	2154.44	1482.76	2	0	0	0	2	0	x			x	x	x	x
1	152.29	0.0619654	0.226042	1.51725	0.497588	Ctrl	Mutant	42345	cdna_Contig467|	3170.63	4297.63	2537.82	2240.32	2151.11	2203.47	5188.54	1873.57	4476.39	2240.32	2808.7	1737.45	1	0	0	0	1	0			x	x		x	x
2	118.51	0.0221545	0.131783	1.16677	0.773379	Ctrl	Mutant	35646	cdna_Contig542|	762.503	844.957	739.589	671.541	684.072	655.968	1247.79	368.362	1304.54	671.541	893.191	517.235	0	1	2	1	0	1	x			x	x	x	x
3	128.23	0.117041	0.318017	1.0951	0.334097	Ctrl	Mutant	41138	cdna_Contig734|	283.223	317.926	292.161	287.86	266.556	261.321	463.477	138.601	515.335	287.86	348.041	206.053	2	1	2	2	2	1				x	x	x	x
1	270.83	0.268314	0.455866	1.65942	0.169739	Ctrl	Mutant	54050	cdna_Contig849|	228.811	464.632	187.891	169.848	100.29	260.972	374.435	202.558	331.415	169.848	130.949	205.778	0	0	0	0	1	0			x	x		x	x
1	140.3	0.695489	0.617639	1.14378	0.0626308	Ctrl	Mutant	36294	cdna_Contig987|	483.725	279.124	582.7	387	509.066	280.342	791.586	121.685	1027.81	387	664.686	221.051	0	0	1	0	1	0				x		x	x
1	173.17	0.263427	0.455834	1.23588	0.172679	Ctrl	Mutant	35657	cdna_Contig1566|	569.306	855.237	602.308	529.944	469.07	640.999	931.634	372.844	1062.39	529.944	612.464	505.432	0	1	0	0	0	0				x		x	x
1	59.87	0.0837421	0.267111	1.40502	0.417098	Ctrl	Mutant	24095	cdna_Contig1675|	49.0919	66.0781	50.8499	35.6208	33.5064	49.0348	80.3357	28.807	89.6925	35.6208	43.7492	38.6642	1	0	1	0	0	0				x		x	x
3	87	0.312327	0.489831	1.4918	0.146689	Ctrl	Mutant	31309	cdna_Contig1753|	2174.19	4167.5	1795.02	1670.79	1283.52	2500	3557.93	1816.84	3166.18	1670.79	1675.88	1971.26	2	3	1	2	2	1				x	x	x	x
1	208.02	0.767866	0.640008	1.22939	0.0571049	Ctrl	Mutant	31511	cdna_Contig1994|	230.515	488.655	150.805	329.475	172.694	205.477	377.223	213.031	266	329.475	225.486	162.02	1	0	0	0	0	0				x		x	x
3	97.3	0.816443	0.653229	1.05731	0.0543699	Ctrl	Mutant	29451	cdna_Contig2031|	977.296	1494.91	944.97	1083.36	856.826	1291.76	1599.28	651.71	1666.8	1083.36	1118.76	1018.56	4	2	2	2	1	2				x	x	x	x
2	441.49	0.123912	0.326147	1.16476	0.320808	Ctrl	Mutant	24202	| rubisco subunit binding-protein alpha	887.128	1068.88	889.447	833.646	867.676	741.626	1451.73	465.982	1568.87	833.646	1132.92	584.776	1	1	2	1	1	0				x	x	x	x
3	140.47	0.12892	0.329928	1.8344	0.311739	Ctrl	Mutant	14727	| trypsin inhibitor	5351.47	9777.14	4072.46	3818.38	2641.15	4007.7	8757.35	4262.38	7183.29	3818.38	3448.54	3160.09	5	5	6	7	4	5			x	x	x	x	x
1	208.52	0.624707	0.604061	1.12628	0.0700102	Ctrl	Mutant	22521	| polyphenol oxidase	307.543	2.43551	488.075	60.8903	352.268	295.42	503.276	1.06177	860.901	60.8903	459.955	232.94	0	0	1	0	0	0				x		x	x
1	48.28	0.0064251	0.0798263	1.56227	0.967313	Ctrl	Mutant	10745	| 40s ribosomal protein	795.239	891.061	706.658	502.408	468.269	561.045	1301.36	388.461	1246.45	502.408	611.417	442.387	1	0	0	0	0	0	x		x	x		x	x
1	961.02	0.81123	0.651748	1.56407	0.0546289	Ctrl	Mutant	22118	| polyphenol oxidase	3783.75	61.2623	3180.77	628.61	2476.55	1386.82	6191.86	26.7075	5610.46	628.61	3233.62	1093.52	1	0	2	0	1	0			x	x		x	x
1	291.93	0.373901	0.525264	Infinity	0.122249	Ctrl	Mutant	24954	| ascorbate peroxidase	0	0	121.011	0	0	0	0	0	213.447	0	0	0	0	0	1	0	0	0		x	x	x		x	x
1	109.12	0.583435	0.590805	1.08826	0.0753987	Ctrl	Mutant	13046	| sodcp_solcs ame: full=superoxide dismutase chloroplastic flags: precursor	797.127	841.446	881.3	574.665	542.328	1198.51	1304.45	366.831	1554.5	574.665	708.116	945.029	0	1	0	0	0	0				x		x	x
1	74.97	0.126521	0.327597	5.23122	0.316023	Ctrl	Mutant	15450	| low molecular weight heat shock protein	41.1412	4.87397	22.6676	0.636215	0.760447	11.7327	67.325	2.12482	39.9827	0.636215	0.992913	9.25134	1	0	0	0	0	0		x	x	x		x	x
1	313.23	0.669921	0.61176	1.24248	0.0650498	Ctrl	Mutant	22281	| nucleoside diphosphate kinase	43.9566	85.9609	27.7662	64.0027	43.4092	19.499	71.9322	37.475	48.976	64.0027	56.6793	15.3751	0	0	0	1	0	0				x		x	x
1	95.4	0.222852	0.428984	1.25854	0.200918	Ctrl	Mutant	17265	| rk17_tobac ame: full=50s ribosomal protein chloroplastic ame: full=cl17 flags: precursor	313.925	428.688	336.844	263.326	229.594	364.783	513.719	186.888	594.148	263.326	299.78	287.633	0	1	1	0	0	0				x		x	x
3	556.52	0.0279888	0.147481	1.34115	0.715044	Ctrl	Mutant	77620	| transketolase 1	1736.25	2026.37	1619.32	1488.71	1241.73	1282.49	2841.26	883.405	2856.27	1488.71	1621.33	1011.25	5	3	6	4	2	5	x			x	x	x	x
2	113.68	0.00737502	0.0813127	1.36745	0.956235	Ctrl	Mutant	10073	| light-inducible protein	1345.59	1648.83	1506.9	1106.16	1127.27	1058.31	2201.97	718.814	2657.98	1106.16	1471.88	834.487	3	1	3	3	2	2	x			x	x	x	x
1	308.18	0.655667	0.61176	1.00174	0.0665156	Ctrl	Mutant	24982	| actin 2 7	33.2361	0	121.868	11.4742	19.3031	124.057	54.3888	0	214.96	11.4742	25.204	97.8198	0	0	1	0	0	0				x		x	x
1	52.56	0.00303792	0.047758	1.37856	0.995818	Ctrl	Mutant	17439	| lipoxygenase [Nicotiana attenuata]	347.451	379.677	356.272	246.794	284.237	254.861	568.582	165.522	628.418	246.794	371.127	200.959	2	1	1	0	1	0	x			x		x	x
1	59.69	0.00392245	0.0563013	1.7703	0.990684	Ctrl	Mutant	10984	| heat shock protein 70	323.574	292.313	369.548	177.894	210.42	168.335	529.508	127.435	651.835	177.894	274.745	132.733	1	0	0	0	1	0	x		x	x		x	x
1	44.33	0.411017	0.543537	1.16183	0.110646	Ctrl	Mutant	9122	| basic blue copper protein	512.46	781.459	757.619	541.609	564.691	659.489	838.609	340.68	1336.34	541.609	737.315	520.011	2	1	1	1	1	2				x		x	x
1	171.17	2.63647e-05	0.00503675	26.8764	1	Ctrl	Mutant	12180	| chloroplast hsp70	424.782	410.162	462.422	12.54	20.7894	14.9421	695.129	178.812	815.652	12.54	27.1447	11.7819	1	0	0	0	0	0	x	x	x	x		x	x
1	136.87	0.418629	0.545182	1.33276	0.108496	Ctrl	Mutant	7544	| chloroplast chlorophyll a b binding protein	18.7211	14.1155	11.68	13.4857	16.7288	3.18746	30.6359	6.1537	20.6021	13.4857	21.8427	2.51333	0	0	0	0	1	0				x		x	x
2	263.71	0.550028	0.57921	1.12411	0.0804548	Ctrl	Mutant	29328	| rubisco subunit binding-protein alpha subunit	539.809	437.694	640.517	484.22	617.309	337.844	883.364	190.814	1129.79	484.22	806.018	266.392	1	1	3	1	2	1				x	x	x	x
1	84.38	0.73032	0.631986	1.05794	0.0597403	Ctrl	Mutant	11192	| heat shock protein 90	211.042	259.827	177.521	282.256	182.541	148.085	345.356	113.272	313.124	282.256	238.343	116.766	1	0	1	0	1	0				x		x	x
1	85.64	0.33814	0.508287	1.96139	0.13552	Ctrl	Mutant	25999	| luminal binding protein	1263.12	4740.07	1040.64	183.827	594.97	2812.45	2067.01	2066.45	1835.55	183.827	776.851	2217.63	0	1	0	0	0	0			x	x		x	x
2	88.24	0.0281442	0.147481	3.09245	0.713607	Ctrl	Mutant	7341	| NA	418.226	967.788	619.788	182.225	147.339	319.05	684.401	421.91	1093.22	182.225	192.38	251.573	1	1	2	0	2	1	x	x	x	x	x	x	x
1	27.08	8.03857e-06	0.0026538	Infinity	1	Ctrl	Mutant	14266	| NA	51.3804	81.6034	49.0096	0	0	0	84.0809	35.5753	86.4466	0	0	0	0	1	0	0	0	0	x	x	x	x		x	x
1	177.86	0.112724	0.313812	1.17455	0.342997	Ctrl	Mutant	25688	| phosphoribulokinase ribulose-5-phosphate kinase	814.513	939.825	836.789	718.799	829.721	657.548	1332.9	409.72	1475.99	718.799	1083.36	518.48	0	2	1	1	2	2				x		x	x
1	369.34	0.363742	0.518718	1.42725	0.125789	Ctrl	Mutant	18364	| ribulose bisphosphate carboxylase oxygenase activase chloroplast	121.523	121.693	73.7663	90.8843	107.001	24.2079	198.865	53.0523	130.114	90.8843	139.711	19.0881	1	0	0	0	0	0				x		x	x
3	100.35	0.0148993	0.116754	1.32753	0.858771	Ctrl	Mutant	32032	| late embryogenesis abundant protein lea14-	727.929	847.776	673.158	569.392	557.241	567.387	1191.21	369.591	1187.36	569.392	727.587	447.388	2	0	2	2	3	0	x			x	x	x	x
1	514.91	0.97712	0.686538	1.02125	0.0500661	Ctrl	Mutant	20473	| PREDICTED: hypothetical protein [Vitis vinifera]	817.909	1330.65	739.027	889.616	834.727	1103.16	1338.46	580.103	1303.55	889.616	1089.9	869.852	1	2	2	2	2	2				x		x	x
1	103.55	0.943685	0.67971	1.01812	0.0504014	Ctrl	Mutant	15906	| ribulose- -bisphosphate carboxylase small subunit	552.857	713.967	477.933	516.247	530.822	666.639	904.716	311.257	843.012	516.247	693.092	525.648	1	0	0	0	0	0				x		x	x
1	57.65	0.669126	0.61176	1.37576	0.0651292	Ctrl	Mutant	25953	| roc1_nicsy ame: full=29 kda ribonucleoprotein chloroplastic ame: full=cp29a flags: precursor	192.494	72.823	280.496	100.063	160.997	135.676	315.004	31.7474	494.758	100.063	210.213	106.982	0	0	0	0	0	1				x		x	x
3	38.48	0.836747	0.656251	1.04535	0.0534371	Ctrl	Mutant	20539	| rna-binding protein	380.036	121.802	470.677	313.797	360.732	255.798	621.905	53.1002	830.213	313.797	471.007	201.698	1	0	0	0	2	0				x	x	x	x
1	400.42	0.182779	0.391827	1.74286	0.237844	Ctrl	Mutant	9139	| NA	955.131	1466.73	2193.89	558.723	745.788	1343.87	1563.01	639.426	3869.73	558.723	973.773	1059.65	2	2	2	1	1	2			x	x		x	x
1	111.81	0.602249	0.597331	2.37217	0.0728323	Ctrl	Mutant	9034	| calmodulin 2-like protein	55.4853	3.38109	62.3484	11.8105	4.2305	35.0578	90.7982	1.474	109.974	11.8105	5.52376	27.6433	0	0	1	0	0	0		x	x	x		x	x
1	61.06	0.270634	0.455866	2.13677	0.168373	Ctrl	Mutant	49446	| oxoglutarate malate translocator	2813.62	11591.3	3609.45	308.184	1186.19	6936.25	4604.32	5053.25	6366.59	308.184	1548.81	5469.28	0	0	0	0	0	1		x	x	x		x	x
1	171.85	0.261426	0.455834	1.67652	0.173907	Ctrl	Mutant	110439	| cc-nbs-lrr resistance protein	249.593	1075.74	245.375	0	23.7187	913.166	408.443	468.972	432.809	0	30.9695	720.037	0	0	0	0	0	1			x	x		x	x
1	153.72	0.858142	0.656689	1.0283	0.0525817	Ctrl	Mutant	71402	| chloroplast heat shock protein 70-2	1105.1	1328.44	937.116	1116.15	914.514	1247.23	1808.43	579.136	1652.95	1116.15	1194.08	983.448	0	0	1	0	0	1				x		x	x
4	489.3	0.858178	0.656689	1.21766	0.0525803	Ctrl	Mutant	19097	| glyceraldehyde-3-phosphate dehydrogenase	15714	45348.7	15242	23065	16258.7	23341.4	25714.9	19769.9	26884.9	23065	21228.9	18404.8	4	1	4	5	5	4				x	x	x	x
2	181.83	0.371469	0.524077	1.32639	0.123081	Ctrl	Mutant	22577	| conserved hypothetical protein [Ricinus communis]	701.917	1190.74	551.835	644.284	588.032	610.649	1148.64	519.107	973.365	644.284	767.792	481.501	1	1	1	2	1	1				x	x	x	x
1	53.68	0.450406	0.552654	1.1784	0.100253	Ctrl	Mutant	26817	| af239927_1glutathione s-transferase	834.534	1238.87	724.069	857.523	731.302	785.141	1365.66	540.09	1277.16	857.523	954.859	619.089	1	0	0	0	0	0				x		x	x
1	75.25	0.00194737	0.0343552	22.3639	0.999232	Ctrl	Mutant	19045	| gibberellin receptor	115.579	154.394	141.771	2.16457	5.83508	10.4115	189.137	67.3088	250.066	2.16457	7.61885	8.20949	0	0	1	0	0	0	x	x	x	x		x	x
2	208.03	0.00484019	0.067996	2.17873	0.983394	Ctrl	Mutant	26229	| thylakoid lumen chloroplast precursor	372.698	476.893	520.991	230.962	172.202	225.912	609.898	207.903	918.96	230.962	224.844	178.133	1	0	2	0	0	0	x	x	x	x	x	x	x
4	104.84	0.525052	0.570874	1.28127	0.0846972	Ctrl	Mutant	109739	| nadp-malate dehydrogenase	3482.27	5692.65	2365.98	3469.11	3318.33	2219.91	5698.52	2481.73	4173.27	3469.11	4332.74	1750.42	0	0	1	3	0	0				x	x	x	x
1	160.24	0.188303	0.393449	1.61588	0.23206	Ctrl	Mutant	36641	| 14-3-3 protein	1465.09	2973.5	2244.64	1125.01	943.327	2067.64	2397.54	1296.31	3959.25	1125.01	1231.7	1630.35	0	0	1	0	0	0			x	x		x	x
1	957.75	0.654537	0.61176	1.16314	0.0666355	Ctrl	Mutant	30442	| phosphoglycerate kinase	1318.78	2564.56	1390.92	1515.85	1561.27	1457.39	2158.1	1118.03	2453.4	1515.85	2038.54	1149.16	2	3	3	1	2	2				x		x	x
1	48.96	0.233454	0.434202	1.27672	0.192802	Ctrl	Mutant	8227	| 60s ribosomal protein	255.396	348.163	212.698	242.7	185.318	211.323	417.94	151.783	375.172	242.7	241.969	166.629	1	0	0	0	0	0				x		x	x
2	64.11	0.092298	0.27827	1.61401	0.392162	Ctrl	Mutant	26868	| PREDICTED: hypothetical protein [Vitis vinifera]	223.531	372.742	205.484	151.578	150.778	194.391	365.795	162.498	362.447	151.578	196.871	153.279	2	1	1	1	1	2			x	x	x	x	x
1	45.18	0.142392	0.352095	35.6583	0.289584	Ctrl	Mutant	20318	| conserved hypothetical protein [Ricinus communis]	4.16685	0	7.09694	0	0.315881	0	6.81879	0	12.5181	0	0.412445	0	0	0	1	0	0	0		x	x	x		x	x
1	78.71	0.0708723	0.246287	1.95921	0.461165	Ctrl	Mutant	10555	| NA	354.48	292.175	381.182	93.7871	170.184	260.647	580.084	127.375	672.355	93.7871	222.209	205.522	0	0	1	0	0	0			x	x		x	x
1	122.22	0.349666	0.511498	1.13377	0.130987	Ctrl	Mutant	12748	| 40s ribosomal protein	243.272	271.013	290.341	289.577	192.113	228	398.099	118.149	512.124	289.577	250.841	179.779	0	0	1	0	0	0				x		x	x
2	169.07	0.231944	0.434202	1.35341	0.193923	Ctrl	Mutant	40417	| isomerase peptidyl-prolyl cis-trans isomerase	813.282	1354.3	752.377	790.752	705.886	660.847	1330.89	590.412	1327.1	790.752	921.674	521.082	0	0	0	0	1	1				x	x	x	x
3	366.69	0.0179097	0.118641	1.57791	0.821602	Ctrl	Mutant	51652	| chloroplast ribulose- -bisphosphate carboxylase oxygenase activase large protein isoform	3010.4	3968.24	2754.8	2181.41	1945.97	2041.21	4926.34	1729.97	4859.12	2181.41	2540.85	1609.5	1	0	0	1	0	1	x		x	x	x	x	x
1	153.93	0.0444932	0.188316	1.52286	0.589336	Ctrl	Mutant	9594	| NA	581.23	758.364	889.011	441.633	466.426	555.377	951.146	330.611	1568.1	441.633	609.011	437.918	0	0	0	1	0	0	x		x	x		x	x
1	221.36	0.147268	0.360135	1.40681	0.282274	Ctrl	Mutant	9366	| triose phosphate isomerase cytosolic isoform	110.462	180.731	114.872	107.051	80.7738	100.818	180.765	78.7903	202.619	107.051	105.466	79.4958	1	0	0	1	1	0				x		x	x
1	447.2	0.268603	0.455866	28.9098	0.169568	Ctrl	Mutant	22350	| vacuolar atp synthase subunit v-atpase b vacuolar proton pump b v-atpase 57 kda	2.96785	2.03487	136.109	1.82958	2.05043	1.00109	4.85671	0.887108	240.079	1.82958	2.67724	0.789367	0	0	1	0	0	0		x	x	x		x	x
2	52.26	0.729419	0.631986	1.17562	0.0598095	Ctrl	Mutant	26615	| expansin precursor	440.357	1109.41	652.644	570.08	481.771	821.547	720.616	483.653	1151.18	570.08	629.048	647.794	1	1	1	0	2	1				x	x	x	x
1	59.04	0.96985	0.684223	1.135	0.0501149	Ctrl	Mutant	23862	| 20s proteasome beta subunit	39.3614	59.8668	14.355	48.7859	24.0408	27.2466	64.4125	26.0991	25.3204	48.7859	31.3901	21.4841	1	0	0	0	0	0				x		x	x
1	67.11	0.0836844	0.267111	1.47789	0.417277	Ctrl	Mutant	8930	| NA	1195.93	1768.3	1859.28	966.733	1007.47	1289.58	1957.06	770.898	3279.53	966.733	1315.45	1016.85	0	0	1	1	0	0				x		x	x
1	67.69	0.381151	0.528751	1.79825	0.119825	Ctrl	Mutant	21600	| elongation factor 1-alpha	269.767	396.536	98.809	172.795	211.14	41.5398	441.456	172.871	174.286	172.795	275.685	32.7544	0	0	1	0	0	0			x	x		x	x
1	42.53	0.616405	0.602058	1.21218	0.071024	Ctrl	Mutant	48396	| fld (flowering locus d) amine oxidase electron carrier oxidoreductase	2640.6	5106.42	2362.16	3012.37	2348.86	2978.44	4321.17	2226.16	4166.55	3012.37	3066.9	2348.52	1	2	2	2	2	2				x		x	x
1	99.92	0.000610026	0.0183081	1.66089	0.999999	Ctrl	Mutant	7976	| NA	459.921	455.894	398.183	271.406	252.366	267.371	752.632	198.749	702.342	271.406	329.514	210.823	0	1	0	0	0	0	x		x	x		x	x
1	33.92	0.0607062	0.223923	2.02289	0.503214	Ctrl	Mutant	11141	| elongation factor 1-gamma	467.673	911.353	459.538	290.615	374.216	244.05	765.318	397.308	810.566	290.615	488.613	192.435	0	0	1	0	0	0		x	x	x		x	x
3	35.46	0.336149	0.507889	1.2105	0.13633	Ctrl	Mutant	26358	| PREDICTED: hypothetical protein [Vitis vinifera]	1460.62	2008.96	1416.82	1294.21	1036.95	1705.51	2390.21	875.812	2499.09	1294.21	1353.95	1344.8	0	0	1	1	1	0				x	x	x	x
1	68.9	0.769208	0.640008	1.47666	0.0570194	Ctrl	Mutant	16636	| protein	679.604	2774.44	661.624	997.942	935.041	854.162	1112.13	1209.53	1167.02	997.942	1220.88	673.512	1	0	0	0	0	0				x		x	x
1	76.67	0.266259	0.455834	1.65256	0.170965	Ctrl	Mutant	8640	| 40s ribosomal protein s16	29.6089	11.9001	31.241	11.8843	14.8826	17.2556	48.4532	5.1879	55.1051	11.8843	19.4322	13.6062	0	0	1	0	0	0			x	x		x	x
1	57.28	0.391289	0.534424	1.15169	0.116568	Ctrl	Mutant	18324	| mitochondrial processing peptidase	733.073	1104.86	823.822	860.16	729.485	721.538	1199.63	481.668	1453.11	860.16	952.487	568.937	0	0	0	1	0	0				x		x	x
1	99.5	0.638267	0.60828	1.13057	0.0684254	Ctrl	Mutant	27798	| hsp12_medsa ame: full= kda class i heat shock protein	438.379	689.573	395.686	424.792	349.845	573.032	717.38	300.622	697.938	424.792	456.792	451.839	0	0	0	1	0	0				x		x	x
1	41.26	0.0167611	0.117124	3.22043	0.835509	Ctrl	Mutant	13928	| minor allergen alt	18.0704	14.0093	10.9432	5.21543	5.75371	2.39022	29.5711	6.10739	19.3023	5.21543	7.51261	1.8847	1	0	0	0	0	0	x	x	x	x		x	x
1	41.52	0.668909	0.61176	1.23621	0.065151	Ctrl	Mutant	29460	| desacetoxyvindoline 4-	53.4878	2.54191	105.946	39.5343	61.0519	30.4398	87.5294	1.10815	186.875	39.5343	79.7152	24.0019	0	0	0	1	0	0				x		x	x
1	45.09	0.772596	0.640008	1.06365	0.0568061	Ctrl	Mutant	11007	| PREDICTED: hypothetical protein [Vitis vinifera]	398.826	330.577	537.792	358.79	511.475	321.106	652.654	144.116	948.595	358.79	667.832	253.194	0	0	0	0	1	0				x		x	x
3	56.15	0.0722825	0.24875	1.24938	0.455887	Ctrl	Mutant	23213	| ethylene-regulated transcript 2	1086.46	1345.92	1034.74	951.723	968.335	855.004	1777.93	586.757	1825.15	951.723	1264.35	674.176	3	1	1	1	1	1				x	x	x	x
1	34.63	0.216737	0.422842	1.4737	0.205875	Ctrl	Mutant	8319	| cyclase family protein	27.7815	46.8906	28.6618	16.0216	20.2574	33.8399	45.4627	20.4421	50.5558	16.0216	26.4501	26.683	1	0	1	0	0	0				x		x	x
1	78.87	0.48305	0.556067	1.43536	0.0928629	Ctrl	Mutant	9906	| NA	1975.34	5254.95	2006.85	1690.63	1381.72	3363.07	3232.52	2290.92	3539.82	1690.63	1804.11	2651.8	0	1	1	0	0	1				x		x	x
1	72.14	0.0366708	0.173537	2.23605	0.642779	Ctrl	Mutant	28449	| 60s ribosomal protein	125.474	65.4582	132.019	49.8128	55.6115	39.0051	205.33	28.5367	232.864	49.8128	72.6118	30.7557	0	0	1	0	0	0	x	x	x	x		x	x
1	145.66	0.522458	0.570184	1.19771	0.0851626	Ctrl	Mutant	10931	| short chain	187.142	100.322	177.611	132.149	143.597	112.558	306.245	43.7359	313.283	132.149	187.494	88.7528	0	0	0	0	1	0				x		x	x
2	51.18	0.0899321	0.276182	1.77717	0.398758	Ctrl	Mutant	47083	| unnamed protein product [Vitis vinifera]	952.125	1987.88	1045.91	719.022	792.567	731.253	1558.09	866.624	1844.85	719.022	1034.85	576.597	0	0	0	1	1	0			x	x	x	x	x
2	28.47	0.902956	0.66391	1.22587	0.051198	Ctrl	Mutant	9644	| NA	173.415	51.8422	230.508	105.316	172.148	94.3241	283.783	22.6008	406.586	105.316	224.774	74.3751	1	0	1	0	0	0				x	x	x	x
1	31.57	0.877333	0.656689	1.19185	0.0519226	Ctrl	Mutant	29054	| glt1 (nadh-dependent glutamate synthase 1 gene)	22.2328	14.2153	67.7687	14.7644	20.8629	51.8141	36.3825	6.19721	119.535	14.7644	27.2406	40.8557	0	0	1	0	0	0				x		x	x
1	114.26	0.926366	0.672141	1.14308	0.0506875	Ctrl	Mutant	27456	| germin-like protein 2	7.14177	0	10.6123	5.62292	9.10998	0.798928	11.6871	0	18.7187	5.62292	11.8949	0.629959	1	0	0	0	0	0				x		x	x
1	191.06	0.812065	0.651748	1.18216	0.0545869	Ctrl	Mutant	9435	| lactoylglutathione lyase	83.2499	59.4063	1.61215	59.1345	62.9035	0	136.233	25.8984	2.84363	59.1345	82.1329	0	0	0	0	0	1	0				x		x	x
2	96.88	0.64065	0.609509	1.32446	0.0681557	Ctrl	Mutant	11302	| dihydrolipoamide dehydrogenase	669.819	443.757	1520.15	466.014	453.15	1069.37	1096.12	193.458	2681.35	466.014	591.676	843.208	2	0	0	0	0	0				x	x	x	x
1	129.21	0.144025	0.353513	1.88318	0.287096	Ctrl	Mutant	7670	| NA	90.5385	195.603	125.025	95.5708	84.2275	38.5379	148.161	85.274	220.527	95.5708	109.976	30.3874	0	0	1	0	0	0			x	x		x	x
1	57.54	0.271338	0.455866	1.47006	0.167962	Ctrl	Mutant	8051	| NA	429.421	463.01	330.582	348.579	367.008	116.359	702.721	201.851	583.103	348.579	479.201	91.7499	1	0	0	0	0	0				x		x	x
1	70.07	0.846598	0.656689	1.01456	0.0530272	Ctrl	Mutant	13745	| NA	58.5353	73.3228	11.7842	61.2396	21.192	59.1497	95.7894	31.9654	20.7859	61.2396	27.6703	46.6399	0	0	0	0	0	1				x		x	x
1	64.91	0.672665	0.61176	1.06599	0.0647775	Ctrl	Mutant	22384	| 60s ribosomal protein l9	321.227	513.574	779.222	231.355	258.732	1024.02	525.668	223.894	1374.45	231.355	337.825	807.449	1	0	0	0	0	0				x		x	x
3	129.26	0.96705	0.684223	1.08783	0.0501372	Ctrl	Mutant	35262	| elongation factor 1-alpha	2329.78	5279.62	1781.59	2669.39	1936.73	4026.7	3812.55	2301.67	3142.5	2669.39	2528.78	3175.08	1	1	0	0	0	1				x	x	x	x
2	235.91	0.653213	0.61176	1.06293	0.0667767	Ctrl	Mutant	66964	contig00158|	1127.01	1467.35	1043.11	1135.2	1135.62	1151.28	1844.27	639.696	1839.91	1135.2	1482.78	907.792	0	0	1	1	0	0				x	x	x	x
2	293.33	0.0656538	0.233805	1.43293	0.481821	Ctrl	Mutant	112488	contig00196|	266.036	270.385	240.659	189.267	219.179	133.856	435.351	117.875	424.491	189.267	286.181	105.547	0	0	1	0	1	0				x	x	x	x
4	112.71	0.189757	0.394706	1.5549	0.230579	Ctrl	Mutant	38682	contig00225|	4710.41	8274.41	3794.04	3906.22	2981.18	3903.58	7708.29	3607.26	6692.2	3906.22	3892.52	3078	2	0	2	2	1	2			x	x	x	x	x
1	78.96	0.467622	0.552654	1.09884	0.096231	Ctrl	Mutant	39971	contig00361|	239.355	308.737	247.909	220.743	217.368	286.293	391.689	134.595	437.279	220.743	283.816	225.744	0	0	0	0	0	1				x		x	x
1	306.86	0.477312	0.552654	1.38337	0.0940906	Ctrl	Mutant	46026	contig00547|	1916.51	3042.66	1109.94	2088.55	1480.99	817.653	3136.24	1326.46	1957.79	2088.55	1933.73	644.724	0	0	0	0	0	1				x		x	x
1	75.18	0.00292051	0.0470991	2.02461	0.996342	Ctrl	Mutant	52220	contig00614|	135.908	183.617	131.161	75.2013	74.2913	73.1116	222.406	80.0486	231.351	75.2013	97.002	57.6489	2	0	1	0	0	0	x	x	x	x		x	x
1	266.84	0.0367878	0.173537	3.38527	0.641905	Ctrl	Mutant	49069	contig00910|	41.478	28.9715	44.6207	4.23334	14.8691	14.8889	67.8762	12.6302	78.7051	4.23334	19.4146	11.74	1	0	0	0	0	0	x	x	x	x		x	x
2	207.34	0.000493479	0.0166609	5.30721	1	Ctrl	Mutant	42156	contig00912|	1635.58	1845.45	1137.42	260.75	327.081	282.392	2676.52	804.53	2006.26	260.75	427.069	222.667	1	0	1	0	0	0	x	x	x	x	x	x	x
1	327.02	0.984396	0.686777	1.05636	0.0500307	Ctrl	Mutant	81713	contig01029|	296.48	862.97	278.253	341.24	297.093	722.66	485.171	376.215	490.802	341.24	387.913	569.821	0	0	0	0	1	0				x		x	x
2	107.16	0.426248	0.546479	1.16379	0.106416	Ctrl	Mutant	40191	contig01052|	363.124	276.381	455.598	292.987	336.554	311.439	594.229	120.49	803.616	292.987	439.438	245.571	0	0	1	0	0	1				x	x	x	x
2	450.57	0.23733	0.438258	1.69361	0.189976	Ctrl	Mutant	73716	contig01222|	2139.3	2325.39	1091.86	1628.86	1142.82	509.216	3500.83	1013.76	1925.89	1628.86	1492.18	401.52	2	1	1	1	2	0			x	x	x	x	x
2	221.85	0.104903	0.297269	1.48476	0.360336	Ctrl	Mutant	66166	contig01328|	1956.74	2614.48	1433.07	1287.98	1363.11	1392.86	3202.09	1139.79	2527.75	1287.98	1779.81	1098.28	2	1	1	0	0	0				x	x	x	x
2	329.26	0.507977	0.558892	1.24565	0.0878508	Ctrl	Mutant	52325	contig01378|	778.98	1613.03	991.985	698.884	636.147	1381.63	1274.75	703.207	1749.73	698.884	830.615	1089.42	1	1	0	1	0	0				x	x	x	x
1	516.22	0.879375	0.656812	1.10985	0.0518584	Ctrl	Mutant	62273	contig01545|	400.772	73.463	2576.37	83.9961	1226.11	1438.54	655.837	32.0264	4544.38	83.9961	1600.93	1134.3	0	0	1	0	0	0				x		x	x
1	110.27	0.0940123	0.282151	1.13642	0.387515	Ctrl	Mutant	52129	contig01553|	90.1642	97.8425	87.835	86.5783	82.7667	73.3844	147.548	42.6548	154.93	86.5783	108.068	57.864	2	0	1	1	1	1				x		x	x
2	627.81	0.872902	0.656689	1.1892	0.0520658	Ctrl	Mutant	32070	contig01567|	2190.39	3949.27	1179.2	2330.26	1999.85	1824.35	3584.43	1721.7	2079.96	2330.26	2611.2	1438.51	0	0	0	0	1	1				x	x	x	x
1	292.2	0.0141363	0.112454	2.43372	0.868537	Ctrl	Mutant	103750	contig01586|	109.715	134.448	107.975	37.8723	70.3122	36.5068	179.542	58.6131	190.454	37.8723	91.8065	28.7858	0	0	1	0	0	0	x	x	x	x		x	x
1	954.38	0.655996	0.61176	1.18131	0.0664807	Ctrl	Mutant	53958	contig01617|	57.2519	0	150.761	46.5739	117.611	11.9025	93.6892	0	265.923	46.5739	153.564	9.38516	0	0	0	0	1	0				x		x	x
1	204.66	0.37043	0.524077	1.34256	0.12344	Ctrl	Mutant	54229	contig01868|	154.734	212.663	96.0431	123.874	127.126	94.1895	253.212	92.7113	169.408	123.874	165.989	74.269	0	0	0	0	1	0				x		x	x
1	283.56	0.716241	0.625984	2.51046	0.0608548	Ctrl	Mutant	64509	contig02013|	98.9497	210.264	0.466709	115.645	1.84001	5.87152	161.925	91.6652	0.823214	115.645	2.4025	4.62973	1	0	0	0	0	0		x	x	x		x	x
4	825.06	0.604328	0.597331	1.11067	0.0725603	Ctrl	Mutant	58355	contig02081|	2592.67	1874.41	2344.81	2284.15	2816.13	1032.87	4242.74	817.157	4135.94	2284.15	3677.02	814.42	2	1	1	1	0	0				x	x	x	x
5	138.86	0.13144	0.335078	1.30948	0.307356	Ctrl	Mutant	42395	contig02781|	1034.68	1304.54	1421.23	817.121	884.88	1169.71	1693.19	568.717	2506.87	817.121	1155.39	922.325	3	0	3	2	2	3				x	x	x	x
2	742.57	0.449178	0.552654	1.17204	0.100552	Ctrl	Mutant	59553	contig02841|	443.209	666.221	475.131	438.066	339.322	574.582	725.284	290.442	838.069	438.066	443.051	453.062	0	0	0	0	0	2				x	x	x	x
1	58.47	0.208935	0.413031	1.50775	0.212521	Ctrl	Mutant	18429	contig03164|	442.764	789.509	768.557	396.806	304.399	625.822	724.556	344.189	1355.63	396.806	397.453	493.464	1	0	0	0	0	0			x	x		x	x
1	168.79	0.413296	0.543537	1.16615	0.109995	Ctrl	Mutant	41949	contig03174|	334.519	217.966	328.315	227.044	279.493	248.766	547.419	95.0229	579.104	227.044	364.933	196.154	1	0	0	1	1	0				x		x	x
3	169.64	0.306977	0.487227	1.13852	0.149199	Ctrl	Mutant	62625	contig03369|	370.658	317.999	346.416	286.634	369.558	252.947	606.558	138.633	611.033	286.634	482.531	199.45	3	2	3	1	0	1				x	x	x	x
2	50.17	0.748632	0.640008	1.11182	0.0583954	Ctrl	Mutant	36159	contig03712|	329.637	648.311	307.843	337.634	223.501	595.34	539.431	282.633	542.996	337.634	291.824	469.429	0	0	0	1	0	1				x	x	x	x
2	112.65	0.698984	0.618834	1.12971	0.0623203	Ctrl	Mutant	95697	contig03978|	320.576	574.357	318.199	376.867	297.518	399.457	524.602	250.393	561.261	376.867	388.468	314.974	0	1	1	0	0	0				x	x	x	x
3	143.39	0.355482	0.511974	1.11792	0.128796	Ctrl	Mutant	43905	contig04553|	1370.92	1912.83	1560.9	1483.73	1424.19	1425.73	2243.42	833.905	2753.22	1483.73	1859.56	1124.19	4	2	4	2	4	2				x	x	x	x
1	94.78	0.7938	0.646263	1.04562	0.0555541	Ctrl	Mutant	28970	contig05777|	283.708	196.988	268.662	243.177	256.309	217.176	464.27	85.8778	473.885	243.177	334.662	171.245	0	0	1	0	0	0				x		x	x
1	1203.98	0.686919	0.61687	1.08417	0.0634125	Ctrl	Mutant	76764	contig06802|	115.369	191.153	197.403	166.54	64.5626	233.698	188.793	83.3338	348.192	166.54	84.2992	184.272	0	0	0	1	0	0				x		x	x
1	52.21	0.845227	0.656689	1.04298	0.0530826	Ctrl	Mutant	44077	contig06838|	180.008	275.7	178.215	161.864	182.233	263.701	294.571	120.193	314.347	161.864	237.942	207.93	1	0	1	1	0	1				x		x	x
1	126.29	0.133824	0.335967	9.90267	0.303316	Ctrl	Mutant	45387	contig08395|	45.2162	7.31569	164.793	2.7627	1.3853	17.7981	73.9935	3.1893	290.674	2.7627	1.80878	14.0339	0	0	1	0	0	0		x	x	x		x	x
1	93.75	0.00713425	0.0813127	8.08359	0.959118	Ctrl	Mutant	16173	contig09227|	89.6527	123.59	102.46	5.1105	10.553	23.3912	146.711	53.8797	180.726	5.1105	13.7791	18.4441	0	0	1	0	0	0	x	x	x	x		x	x
3	310.43	0.986348	0.686777	1.03095	0.0500235	Ctrl	Mutant	36031	contig09753|	7981.18	16199.6	7787.42	9511.19	7920.58	13576.7	13060.7	7062.29	13736	9511.19	10341.9	10705.3	1	1	1	0	0	0				x	x	x	x
3	75.46	0.447532	0.552654	1.39357	0.100954	Ctrl	Mutant	54286	contig10590|	1468.49	3547.83	1571.49	1868.2	1203.23	1655.86	2403.09	1546.69	2771.91	1868.2	1571.06	1305.66	2	1	2	4	2	2				x	x	x	x
1	61.57	0.827173	0.654153	1.01564	0.053862	Ctrl	Mutant	39415	contig10753|	702.636	648.766	630.329	619.934	793.776	537.512	1149.82	282.832	1111.82	619.934	1036.43	423.831	1	0	0	1	0	0				x		x	x
2	294.79	0.398272	0.538013	1.21503	0.114411	Ctrl	Mutant	73873	contig11904|	370.292	531.093	311.013	273.526	324.266	400.039	605.96	231.532	548.587	273.526	423.394	315.433	2	0	2	2	1	0				x	x	x	x
1	56.12	0.409666	0.543149	1.36549	0.111035	Ctrl	Mutant	19054	contig12232|	64.7502	104.724	49.379	26.7518	55.0274	78.4953	105.96	45.6548	87.098	26.7518	71.8491	61.894	0	0	0	0	0	1				x		x	x
2	51.85	0.033073	0.164188	2.64078	0.670852	Ctrl	Mutant	27101	contig12710|	2865.67	7073.11	3465.92	1782.17	1773.07	1520.81	4689.49	3083.55	6113.43	1782.17	2315.09	1199.16	1	0	0	0	1	0	x	x	x	x	x	x	x
1	416.65	0.730184	0.631986	1.08337	0.0597507	Ctrl	Mutant	37250	contig12868|	32.0337	356.321	54.8869	177.213	2.40682	229.51	52.4212	155.339	96.8134	177.213	3.14258	180.97	0	0	0	0	0	1				x		x	x
1	111.3	0.844546	0.656689	1.09638	0.0531103	Ctrl	Mutant	18999	contig13847|	532.098	963.359	486.875	595.708	557.985	654.369	870.745	419.98	858.784	595.708	728.559	515.974	0	0	0	0	0	1				x		x	x
2	162.57	0.159544	0.372797	1.20082	0.265306	Ctrl	Mutant	61614	contig13934|	420.733	388.228	457.997	373.315	395.45	286.316	688.503	169.25	807.847	373.315	516.338	225.762	0	0	0	0	1	1				x	x	x	x
1	117.31	0.329819	0.503873	1.14691	0.138959	Ctrl	Mutant	34049	contig14028|	1016.07	1383.07	1065.76	953.387	913.047	1154.64	1662.73	602.954	1879.87	953.387	1192.16	910.44	1	0	0	0	0	0				x		x	x
2	164.82	0.508725	0.558892	1.19535	0.0877081	Ctrl	Mutant	21295	contig14274|	1127.99	1837.52	996.67	1196.45	919.935	1198.29	1845.88	801.074	1758	1196.45	1201.16	944.858	1	2	2	1	2	2				x	x	x	x
2	706.21	0.428601	0.548432	1.25876	0.105787	Ctrl	Mutant	45894	contig15449|	1029.58	1290.65	737.15	1047.31	910.95	470.616	1684.84	562.662	1300.24	1047.31	1189.43	371.084	1	1	1	1	2	1				x	x	x	x
1	136.5	0.00027113	0.0107828	18.7401	1	Ctrl	Mutant	45807	contig15510|	993.4	1845.48	1062.35	66.8912	87.4652	53.8195	1625.64	804.543	1873.84	66.8912	114.203	42.437	0	1	0	0	0	0	x	x	x	x		x	x
2	68.29	0.0109283	0.0985235	1.25674	0.910579	Mutant	Ctrl	30695	| hypothetical protein MIMGU_mgv1a015488mg [Erythranthe guttata]	801.483	851.206	864.694	990.379	1149.05	1024.26	1311.58	371.086	1525.21	990.379	1500.32	807.638	0	1	1	1	1	1	x			x	x	x		x
1	82.99	0.483415	0.556067	1.2456	0.092786	Mutant	Ctrl	29595	| potential alanine glyoxylate aminotransferase fragment [Pseudozyma hubeiensis SY62]	39.2343	68.7041	18.6875	62.4783	35.5632	59.6838	64.2045	29.9518	32.9623	62.4783	46.4348	47.061	1	0	0	0	0	0				x		x		x
3	495.49	0.773911	0.640008	1.02945	0.0567243	Mutant	Ctrl	123069	| hypothetical protein MIMGU_mgv1a006835mg [Erythranthe guttata]	1368.11	1892.77	1168.53	1531.97	1373.17	1654.72	2238.82	825.16	2061.13	1531.97	1792.95	1304.76	1	1	0	1	2	0				x	x	x		x
2	371.17	0.230384	0.433376	1.49642	0.195093	Mutant	Ctrl	45780	| hypothetical protein CICLE_v10022260mg [Citrus clementina]	120.711	142.633	138.258	118.978	269.247	212.739	197.535	62.1814	243.869	118.978	351.555	167.746	0	0	1	1	0	0				x	x	x		x
2	70.27	0.0857419	0.26837	1.78467	0.410993	Mutant	Ctrl	47019	| hypothetical protein MIMGU_mgv1a011280mg [Erythranthe guttata]	513.157	233.192	297.22	800.429	548.832	513.165	839.749	101.661	524.257	800.429	716.609	404.634	0	0	0	1	1	0			x	x	x	x		x
4	77.93	0.695967	0.617639	1.15972	0.0625881	Mutant	Ctrl	50281	| _	1017.44	1203.44	1367.78	1177.49	948.885	2035.46	1664.98	524.642	2412.59	1177.49	1238.96	1604.97	3	1	1	2	3	1				x	x	x		x
1	205.09	0.201574	0.409487	1.14294	0.219144	Mutant	Ctrl	52580	| hypothetical protein VITISV_039112 [Vitis vinifera]	318.572	393.066	325.682	369.723	373.797	442.078	521.323	171.358	574.46	369.723	488.066	348.581	0	0	0	0	0	1				x		x		x
1	88.99	0.694285	0.617639	1.43132	0.062739	Mutant	Ctrl	22833	| _	4.36396	10.4758	17.3544	7.78031	7.24475	31.0549	7.14134	4.56695	30.6108	7.78031	9.45945	24.487	0	0	0	0	0	1				x		x		x
1	52.86	0.750607	0.640008	1.02274	0.0582572	Mutant	Ctrl	50580	| Ty3/gypsy retrotransposon protein [Beta vulgaris subsp. vulgaris]	2766.86	5407.83	2289.79	3958.45	3453.57	3290.41	4527.79	2357.57	4038.89	3958.45	4509.32	2594.5	2	1	1	2	1	1				x		x		x
1	61.67	0.00588933	0.0747793	6.12796	0.973148	Mutant	Ctrl	10338	| _	12.7141	7.32227	17.1574	68.1287	49.6776	110.116	20.8059	3.19217	30.2635	68.1287	64.8639	86.8271	0	0	0	1	1	1	x	x	x	x		x		x
5	859.67	0.019815	0.124602	1.54296	0.799334	Mutant	Ctrl	60347	| hypothetical protein MIMGU_mgv1a010429mg [Erythranthe guttata]	5344.77	7001.35	5023.41	9292.47	7935.26	9572.84	8746.38	3052.26	8860.64	9292.47	10361.1	7548.24	3	2	3	7	5	4	x		x	x	x	x		x
6	715.36	4.67087e-05	0.00503675	1.8803	1	Mutant	Ctrl	62545	| hypothetical protein MIMGU_mgv1a011082mg [Erythranthe guttata]	1735.07	1682.66	1809.05	3210.99	3447.32	3169.6	2839.34	733.561	3190.92	3210.99	4501.16	2499.25	0	1	1	2	5	2	x		x	x	x	x		x
1	44.78	0.0470405	0.193631	1.23217	0.573849	Mutant	Ctrl	49445	| hypothetical protein MIMGU_mgv1a016132mg [Erythranthe guttata]	98.9246	84.5994	93.4507	101.531	122.927	116.82	161.884	36.8814	164.835	101.531	160.506	92.1134	0	0	0	0	1	0	x			x		x		x
1	137.4	0.026732	0.144674	2.39551	0.726878	Mutant	Ctrl	53477	| unnamed protein product [Coffea canephora]	122.735	57.9934	120.7	198.144	239.477	284.452	200.848	25.2824	212.898	198.144	312.685	224.292	0	0	0	0	1	0	x	x	x	x		x		x
2	93.41	0.294008	0.483658	1.70737	0.155596	Mutant	Ctrl	42217	| hypothetical protein JCGZ_17962 [Jatropha curcas]	66.1103	40.0721	267.402	120.674	339.794	177.378	108.185	17.4696	471.663	120.674	443.669	139.864	0	0	2	0	0	2			x	x	x	x		x
1	59	0.0166231	0.117124	8.56117	0.837203	Mutant	Ctrl	14873	| BP8 [Betula pendula]	25.0127	48.844	16.0183	223.839	104.545	441.051	40.9318	21.2937	28.2542	223.839	136.505	347.772	0	0	0	1	0	0	x	x	x	x		x		x
1	38.77	0.169204	0.381184	1.24561	0.253222	Mutant	Ctrl	15430	| _	223.952	146.83	195.628	234.49	259.731	211.306	366.484	64.011	345.062	234.49	339.13	166.616	0	0	1	0	0	0				x		x		x
3	298.08	0.23845	0.438258	1.12822	0.189174	Mutant	Ctrl	43705	| hypothetical protein MIMGU_mgv1a011554mg [Erythranthe guttata]	812.074	1009.83	738.741	954.18	948.672	986.132	1328.91	440.24	1303.04	954.18	1238.68	777.571	3	0	1	2	3	1				x	x	x		x
3	100.01	0.464465	0.552654	1.1386	0.0969472	Mutant	Ctrl	49465	| hypothetical protein MIMGU_mgv1a012870mg [Erythranthe guttata]	500.747	281.07	545.851	499.913	526.606	485.165	819.441	122.534	962.81	499.913	687.588	382.555	1	0	3	1	1	1				x	x	x		x
4	1234.53	0.58637	0.590805	1.08899	0.0749856	Mutant	Ctrl	24972	| hypothetical protein MIMGU_mgv1a015249mg [Erythranthe guttata]	6220.51	11513	8117.33	8169.07	10169.7	9812.65	10179.5	5019.14	14317.9	8169.07	13278.5	7737.33	3	2	5	2	4	2				x	x	x		x
2	237.83	0.199782	0.409487	1.39293	0.220813	Mutant	Ctrl	63870	| PREDICTED: malate dehydrogenase [NADP]	2001.53	3411.86	1661.79	3586.44	2627.14	3641.66	3275.37	1487.41	2931.18	3586.44	3430.24	2871.47	0	0	0	1	1	2				x	x	x		x
1	407.84	0.1537	0.368157	2.1524	0.273143	Mutant	Ctrl	120225	| _	1171.98	2275.31	1720.14	2620.28	2123.4	6378.73	1917.87	991.93	3034.11	2620.28	2772.52	5029.66	0	0	0	0	1	0		x	x	x		x		x
1	152.1	0.628171	0.604061	1.06859	0.069597	Mutant	Ctrl	22704	| _	2371.01	4347.68	2566.21	3164.75	3150.44	3606.54	3880.01	1895.39	4526.47	3164.75	4113.52	2843.77	0	0	0	1	0	0				x		x		x
4	83.63	0.873588	0.656689	1.00644	0.0520433	Mutant	Ctrl	53947	| hypothetical protein MIMGU_mgv1a008978mg [Erythranthe guttata]	3631.22	4985.34	3582.62	4141.54	4115.72	4020.44	5942.26	2173.38	6319.28	4141.54	5373.88	3170.14	3	0	1	1	1	1				x	x	x		x
4	440.39	0.0766504	0.255604	1.4828	0.440281	Mutant	Ctrl	36447	| hypothetical protein MIMGU_mgv1a015637mg [Erythranthe guttata]	1270.06	1517.36	1023.76	2330.85	1551.67	1768.72	2078.38	661.499	1805.78	2330.85	2026.01	1394.64	3	1	2	4	4	2				x	x	x		x
2	100.78	0.264907	0.455834	1.70468	0.171779	Mutant	Ctrl	43177	| PREDICTED: uncharacterized protein LOC103696486 [Phoenix dactylifera]	98.5857	32.3295	145.488	169.592	206.52	95.068	161.329	14.0942	256.621	169.592	269.652	74.9617	0	0	1	1	2	0			x	x	x	x		x
5	578.88	0.958723	0.683373	1.01653	0.0502154	Mutant	Ctrl	129716	| hypothetical protein MIMGU_mgv1a022832mg [Erythranthe guttata]	3943.73	5386.34	4519.97	4497.88	3766.44	5814.61	6453.67	2348.19	7972.64	4497.88	4917.83	4584.85	2	2	3	1	3	2				x	x	x		x
4	214.01	0.000131897	0.00791701	2.55233	1	Mutant	Ctrl	111772	| hypothetical protein MIMGU_mgv1a001481mg [Erythranthe guttata]	823.991	664.893	770.619	1883.33	1908.78	1974.87	1348.41	289.862	1359.27	1883.33	2492.29	1557.2	1	0	1	5	1	4	x	x	x	x	x	x		x
1	41.89	0.833958	0.655642	1.00981	0.0535581	Mutant	Ctrl	18960	| _	466.505	1000.72	454.964	630.056	512.341	798.652	763.406	436.269	802.498	630.056	668.962	629.742	2	1	1	1	2	0				x		x		x
1	45.2	0.0201768	0.124764	2.17052	0.79522	Mutant	Ctrl	14577	| _	745.724	1382.05	726.589	2047.94	1854.76	2292.76	1220.33	602.508	1281.61	2047.94	2421.75	1807.86	2	2	2	2	3	3	x	x	x	x		x		x
3	499.78	0.590861	0.592895	1.05192	0.0743629	Mutant	Ctrl	41640	| cyclophylin [Digitalis lanata]	2162.36	2832.47	2014.38	2538.19	2436.95	2397.98	3538.57	1234.83	3553.1	2538.19	3181.92	1890.82	3	3	2	4	3	2				x	x	x		x
5	696.98	6.10269e-05	0.00503675	5.09177	1	Mutant	Ctrl	52602	| cyclophylin [Digitalis lanata]	3354.19	4025.13	3260.11	19354	15808.7	19010.8	5488.93	1754.77	5750.41	19354	20641.3	14990.1	5	2	4	3	6	3	x	x	x	x	x	x		x
3	111.64	0.5606	0.584847	1.16903	0.0787819	Mutant	Ctrl	50687	| hypothetical protein MIMGU_mgv1a008452mg [Erythranthe guttata]	2062.07	1355.23	1958.74	2119.8	2706.56	1458.41	3374.45	590.82	3454.95	2119.8	3533.95	1149.96	0	0	0	0	3	0				x	x	x		x
2	132.76	0.239141	0.438258	1.2576	0.188681	Mutant	Ctrl	49825	| hypothetical protein MIMGU_mgv1a012213mg [Erythranthe guttata]	592.669	853.718	551.764	905.699	671.013	936.168	969.866	372.181	973.241	905.699	876.14	738.174	0	1	1	3	1	1				x	x	x		x
2	150.49	0.103165	0.293604	1.14527	0.364422	Mutant	Ctrl	38782	| chitinase 3 [Avicennia marina]	268.699	306.175	310.134	311.038	338.641	363.896	439.709	133.478	547.035	311.038	442.163	286.934	0	0	1	0	1	0				x	x	x		x
2	427.28	0.850557	0.656689	1.02809	0.0528702	Mutant	Ctrl	37657	| _	1944.93	3102.33	2340.66	2351.98	2163.23	3080.22	3182.76	1352.47	4128.61	2351.98	2824.53	2428.77	1	1	2	1	1	1				x	x	x		x
1	103.1	0.693155	0.617639	1.08205	0.0628409	Mutant	Ctrl	19511	| small heat shock protein 17.9CI [Boea hygrometrica]	1170.43	837.222	1593.43	999.683	1336.48	1560.38	1915.33	364.99	2810.6	999.683	1745.04	1230.37	1	0	0	0	0	0				x		x		x
2	546.74	0.124954	0.327394	1.60028	0.318879	Mutant	Ctrl	49758	| hypothetical protein EUGRSUZ_H04126 [Eucalyptus grandis]	1137.81	2106.02	939.973	2045.75	1901.72	2747.81	1861.96	918.126	1657.99	2045.75	2483.07	2166.66	1	1	0	3	2	3			x	x	x	x		x
9	513.68	0.0733244	0.249555	1.96522	0.452064	Mutant	Ctrl	64003	| hypothetical protein MIMGU_mgv1a022832mg [Erythranthe guttata]	4202.16	8326.54	4232.56	10999.7	7670.68	14269.2	6876.57	3629.99	7465.68	10999.7	10015.6	11251.3	6	5	3	9	7	11			x	x	x	x		x
1	48.68	0.282663	0.473687	1.27655	0.161584	Mutant	Ctrl	27972	| hypothetical protein M569_03153 [Genlisea aurea]	585.222	723.013	453.083	891.829	798.952	557.626	957.68	315.2	799.179	891.829	1043.19	439.691	0	0	0	0	0	1				x		x		x
1	147.47	0.0844977	0.268226	2.72281	0.41477	Mutant	Ctrl	22459	| PREDICTED: 18.5 kDa class I heat shock protein-like [Cicer arietinum]	67.2963	42.8277	71.7417	127.754	83.8724	283.56	110.126	18.6709	126.543	127.754	109.512	223.588	0	0	0	1	0	1		x	x	x		x		x
2	80.2	0.156505	0.369135	1.5968	0.269329	Mutant	Ctrl	72016	| hypothetical protein JCGZ_25604 [Jatropha curcas]	179.795	177.184	188.573	341.395	358.445	171.296	294.223	77.2441	332.618	341.395	468.021	135.068	1	0	1	0	1	0			x	x	x	x		x
2	58.26	0.537986	0.575811	1.09468	0.0824477	Mutant	Ctrl	85140	| unnamed protein product [Coffea canephora]	240.23	193.454	279.805	222.019	302.44	256.583	393.121	84.337	493.539	222.019	394.895	202.317	1	0	1	0	1	1				x	x	x		x
1	49.66	0.000809651	0.0198855	2.19555	0.999994	Mutant	Ctrl	16971	| hypothetical protein MIMGU_mgv1a021287mg [Erythranthe guttata]	131.959	107.659	113.488	282.919	262.84	229.504	215.942	46.9342	200.179	282.919	343.189	180.965	1	0	1	1	1	0	x	x	x	x		x		x
6	846.48	0.050441	0.193631	1.83625	0.554434	Mutant	Ctrl	121547	| hypothetical protein MIMGU_mgv1a009344mg [Erythranthe guttata]	1388.34	1436.25	807.107	2808.44	1876.38	1983.89	2271.93	626.139	1423.63	2808.44	2449.99	1564.31	2	1	1	3	2	1			x	x	x	x		x
6	375.64	0.714012	0.625676	1.03763	0.0610379	Mutant	Ctrl	58862	| hypothetical protein MIMGU_mgv1a007416mg [Erythranthe guttata]	4506.59	6613.44	3871.04	5306.79	5164.45	5083.93	7374.75	2883.15	6828.01	5306.79	6743.21	4008.71	5	5	5	5	5	5				x	x	x		x
4	128.02	0.780832	0.642033	1.02819	0.056303	Mutant	Ctrl	50631	| hypothetical protein MIMGU_mgv1a010472mg [Erythranthe guttata]	1255.42	1642.3	1219.72	1456.23	1250.01	1527.27	2054.42	715.967	2151.42	1456.23	1632.14	1204.26	3	0	1	2	1	0				x	x	x		x
1	203.06	0.328674	0.503873	2.18829	0.139444	Mutant	Ctrl	42811	| hypothetical protein MIMGU_mgv1a012234mg [Erythranthe guttata]	68.7461	52.0418	25.7166	159.015	130.053	31.5251	112.499	22.6878	45.3608	159.015	169.81	24.8577	1	0	0	0	1	0		x	x	x		x		x
5	174.82	0.401415	0.538246	1.28102	0.113463	Mutant	Ctrl	57042	| dehydrin [Salvia miltiorrhiza]	1287.81	2410.58	753.384	2313.74	1443.78	1945.28	2107.43	1050.9	1328.87	2313.74	1885.15	1533.86	2	1	3	3	4	2				x	x	x		x
2	23.31	0.982405	0.686538	1.00268	0.0500391	Mutant	Ctrl	50083	| hypothetical protein MIMGU_mgv1a010065mg [Erythranthe guttata]	634.279	942.283	637.495	610.247	680.712	929.022	1037.96	410.792	1124.46	610.247	888.804	732.539	0	0	1	1	0	1				x	x	x		x
1	62.57	0.133607	0.335967	1.92708	0.30368	Mutant	Ctrl	43437	| hypothetical protein MIMGU_mgv1a014085mg [Erythranthe guttata]	278.425	97.7029	409.705	459.737	562.236	492.387	455.625	42.5939	722.666	459.737	734.109	388.25	0	0	0	0	1	1			x	x		x		x
2	72.06	0.68312	0.616716	1.208	0.0637682	Mutant	Ctrl	86778	| hypothetical protein MIMGU_mgv1a010345mg [Erythranthe guttata]	711.842	922.626	2247.96	1425.44	787.518	2477.03	1164.88	402.222	3965.1	1425.44	1028.26	1953.15	0	0	1	0	3	1				x	x	x		x
2	566.55	0.861499	0.656689	1.55518	0.0524591	Mutant	Ctrl	61267	| O-acetylserine(thiol)-lyase [Sesamum indicum]	252.001	18.0235	186.425	331.3	376.255	2.30388	412.383	7.85743	328.83	331.3	491.275	1.81663	1	0	0	0	1	0			x	x	x	x		x
4	550.18	0.540639	0.575811	1.09867	0.0820004	Mutant	Ctrl	36536	| Mn-superoxide dismutase [Haberlea rhodopensis]	5972.79	10380.7	5983.59	8012.98	7572.5	8955.7	9774.09	4525.52	10554.3	8012.98	9887.39	7061.62	4	4	5	3	4	3				x	x	x		x
3	191.26	0.688561	0.61687	1.03591	0.0632605	Mutant	Ctrl	62495	| _	1961.36	2609.49	2047.28	2193.89	2195.42	2466.45	3209.65	1137.61	3611.14	2193.89	2866.55	1944.81	2	1	2	3	1	3				x	x	x		x
1	62.58	0.526367	0.570874	1.11263	0.0844632	Mutant	Ctrl	87688	| hypothetical protein MIMGU_mgv1a006364mg [Erythranthe guttata]	1070.62	1950.53	933.301	1566.13	1460.71	1373	1752	850.339	1646.22	1566.13	1907.24	1082.62	1	1	1	1	1	2				x		x		x
3	97.4	0.665478	0.61176	1.26065	0.0654974	Mutant	Ctrl	69139	| unnamed protein product [Coffea canephora]	3024.12	3386.9	2651.02	6222.41	2860.57	2341.11	4948.78	1476.53	4676.06	6222.41	3735.04	1845.98	3	2	2	2	2	1				x	x	x		x
3	322.63	0.288345	0.479323	1.28115	0.158537	Mutant	Ctrl	40104	| aluminium induced protein [Avicennia marina]	802.959	1265.62	620.439	1097.04	978.224	1369.77	1313.99	551.752	1094.37	1097.04	1277.26	1080.07	2	0	2	4	2	0				x	x	x		x
1	97.15	0.979539	0.686538	1.00418	0.0500529	Mutant	Ctrl	41932	| hypothetical protein MIMGU_mgv1a026062mg [Erythranthe guttata]	572.467	785.9	476.393	735.675	653.053	453.709	936.806	342.616	840.295	735.675	852.69	357.752	0	0	0	0	1	0				x		x		x
2	243.24	0.952549	0.682883	1.00175	0.0502848	Mutant	Ctrl	56413	| hypothetical protein MIMGU_mgv1a011040mg [Erythranthe guttata]	1102.27	1210.95	1101.52	1161.53	1163.69	1095.48	1803.8	527.918	1942.94	1161.53	1519.43	863.796	1	1	2	2	1	0				x	x	x		x
6	763.34	0.0299799	0.152267	1.45035	0.697058	Mutant	Ctrl	57335	| fibrillin [Capsicum annuum]	7523.08	10890.4	7863.28	12533.7	12662.6	12914.3	12311	4747.73	13869.8	12533.7	16533.6	10183	8	7	9	9	11	11	x			x	x	x		x
2	125.95	0.704686	0.622033	1.04816	0.0618237	Mutant	Ctrl	69165	| PREDICTED: uncharacterized protein LOC102578228 [Solanum tuberosum]	733.576	1360.95	483.14	741.011	925.525	1035.28	1200.45	593.311	852.195	741.011	1208.46	816.323	1	0	0	2	0	0				x	x	x		x
4	1147.66	0.100083	0.288565	1.66796	0.371892	Mutant	Ctrl	71301	| unnamed protein product [Coffea canephora]	4342.31	8233.99	4836.39	9746.19	7192.98	12104.5	7105.91	3589.64	8530.77	9746.19	9391.85	9544.45	3	5	4	6	6	6			x	x	x	x		x
2	94.62	0.0211634	0.127032	2.07319	0.784188	Mutant	Ctrl	30438	| hypothetical protein MIMGU_mgv1a015611mg [Erythranthe guttata]	389.438	422.798	394.375	786.876	589.532	1125.13	637.291	184.32	695.626	786.876	769.75	887.174	0	1	0	1	2	3	x	x	x	x	x	x		x
1	183.05	0.00496522	0.0682993	1.17114	0.982269	Mutant	Ctrl	41075	| unnamed protein product [Coffea canephora]	276.534	258.443	276.847	314.642	309.068	327.048	452.531	112.669	488.322	314.642	403.549	257.879	0	0	0	0	1	0	x			x		x		x
2	42.86	0.18553	0.392625	1.43543	0.234931	Mutant	Ctrl	55880	| hypothetical protein MIMGU_mgv1a010340mg [Erythranthe guttata]	215.849	112.952	233	272.962	312.08	221.384	353.223	49.2418	410.982	272.962	407.481	174.562	1	0	2	1	2	0				x	x	x		x
1	154.08	0.345536	0.510393	2.69984	0.132582	Mutant	Ctrl	38225	| hypothetical protein MIMGU_mgv1a016234mg [Erythranthe guttata]	903.291	205.006	269.376	1706.62	1786.58	226.29	1478.18	89.3729	475.145	1706.62	2332.74	178.431	0	0	0	0	1	0		x	x	x		x		x
2	54.67	0.485451	0.556929	1.16217	0.0923578	Mutant	Ctrl	55826	| hypothetical protein MIMGU_mgv1a012054mg [Erythranthe guttata]	287.027	138.447	317.069	276.103	326.772	260.087	469.702	60.3565	559.269	276.103	426.665	205.08	1	0	1	1	2	0				x	x	x		x
6	256.28	0.385068	0.530788	1.1452	0.118548	Mutant	Ctrl	59334	| unnamed protein product [Coffea canephora]	3320.23	5109.75	3560.95	4360.2	4118.36	5253.46	5433.35	2227.61	6281.04	4360.2	5377.33	4142.38	0	0	0	3	3	3				x	x	x		x
1	56.92	0.457612	0.552654	1.13045	0.0985344	Mutant	Ctrl	20227	| hypothetical protein MIMGU_mgv1a013002mg [Erythranthe guttata]	207.831	253.798	223.264	219.788	230.866	323.582	340.102	110.644	393.808	219.788	301.441	255.146	1	0	0	0	0	0				x		x		x
2	330.6	0.867658	0.656689	1.03154	0.0522422	Mutant	Ctrl	129863	| unnamed protein product [Coffea canephora]	858.843	585.07	323.471	719.729	727.81	375.595	1405.44	255.063	570.561	719.729	950.299	296.159	1	1	1	1	1	0				x	x	x		x
3	277.53	0.527624	0.570874	1.14005	0.0842407	Mutant	Ctrl	50148	| _	1626.41	3397.14	1655.64	2684.09	2041.55	2888.95	2661.51	1481	2920.33	2684.09	2665.65	2277.95	2	3	1	3	2	3				x	x	x		x
2	104.87	0.10264	0.293375	1.31471	0.365673	Mutant	Ctrl	44083	| class IV chitinase [Nepenthes alata]	451.95	554.9	424.645	583.376	544.125	754.493	739.587	241.911	749.018	583.376	710.463	594.922	1	1	0	0	2	1				x	x	x		x
1	601.5	0.00138111	0.0294162	2.00111	0.999849	Mutant	Ctrl	47927	| unnamed protein product [Coffea canephora]	1526.99	1406.08	1437.82	3172.77	3121.9	2451.95	2498.82	612.987	2536.12	3172.77	4076.26	1933.38	2	1	2	2	2	2	x	x	x	x		x		x
4	218.39	0.00161402	0.030448	1.45688	0.999672	Mutant	Ctrl	45393	| hypothetical protein MIMGU_mgv1a012812mg [Erythranthe guttata]	1811.38	2112.56	1838.9	2787.48	2849.39	2758.92	2964.21	920.98	3243.58	2787.48	3720.45	2175.43	0	0	1	3	3	1	x			x	x	x		x
2	132.08	0.185371	0.392625	1.32263	0.235098	Mutant	Ctrl	84827	| hypothetical protein CISIN_1g029999mg [Citrus sinensis]	1696.55	2664.74	1666.82	2551.89	2245	3176.09	2776.3	1161.7	2940.06	2551.89	2931.28	2504.36	2	3	3	2	2	2				x	x	x		x
3	79.62	0.745279	0.640008	1.01814	0.058633	Mutant	Ctrl	14552	| _	1255.62	2715.95	1082.38	1674.25	1572.72	1898.66	2054.74	1184.03	1909.18	1674.25	2053.5	1497.1	1	2	1	1	2	3				x	x	x		x
3	335.29	0.000467285	0.0166609	7.36706	1	Mutant	Ctrl	44389	| hypothetical protein MIMGU_mgv1a013164mg [Erythranthe guttata]	614.576	708.653	476.092	4015.28	3483.1	5757.32	1005.71	308.94	839.765	4015.28	4547.88	4539.68	0	0	0	0	2	1	x	x	x	x	x	x		x
2	878.94	0.420804	0.545182	1.0889	0.107895	Mutant	Ctrl	62808	| glyceraldehyde-3-phosphate dehydrogenase B [Scoparia dulcis]	525.137	452.215	577.611	494.594	590.824	607.775	859.353	197.145	1018.83	494.594	771.437	479.234	1	0	1	2	0	1				x	x	x		x
6	160.39	0.919533	0.670869	1.01894	0.0508217	Mutant	Ctrl	190831	| hypothetical protein MIMGU_mgv1a000710mg [Erythranthe guttata]	5560.55	5375.97	4109.06	4604.47	4461.84	6264.24	9099.49	2343.67	7247.85	4604.47	5825.81	4939.39	2	1	0	4	4	0				x	x	x		x
4	357.97	0.18532	0.392625	1.29717	0.235151	Mutant	Ctrl	50617	| unnamed protein product [Coffea canephora]	1565.02	2470.57	1721	2254.63	2990.16	2222.51	2561.06	1077.05	3035.61	2254.63	3904.24	1752.46	2	1	1	1	2	1				x	x	x		x
2	65.15	0.227598	0.429358	1.73092	0.197213	Mutant	Ctrl	61000	| hypothetical protein MIMGU_mgv1a007367mg [Erythranthe guttata]	282.56	374.559	274.259	453.731	297.325	861.083	462.391	163.29	483.758	453.731	388.216	678.969	1	0	0	1	0	0			x	x	x	x		x
4	139.13	0.149159	0.363413	1.24545	0.279532	Mutant	Ctrl	48468	| SOUL heme-binding family protein [Populus trichocarpa]	1624.59	2472.33	1870.63	2502.75	2282.09	2647.43	2658.54	1077.82	3299.55	2502.75	2979.72	2087.51	1	0	0	5	4	1				x	x	x		x
1	29.55	0.636298	0.60828	1.07439	0.0686501	Mutant	Ctrl	106054	| unnamed protein product [Coffea canephora]	1194.15	1708.29	533.21	1327.59	1139.54	1224.09	1954.15	744.735	940.513	1327.59	1487.89	965.202	0	0	0	0	0	1				x		x		x
1	96.87	0.166854	0.378584	1.4203	0.256068	Mutant	Ctrl	19475	| unnamed protein product [Coffea canephora]	28.2005	28.5632	38.7961	54.2347	31.5066	49.9826	46.1484	12.4522	68.4313	54.2347	41.1381	39.4116	0	0	0	1	0	0				x		x		x
3	170.48	0.620379	0.603319	1.07435	0.0705345	Mutant	Ctrl	70961	| hypothetical protein POPTR_0005s23110g [Populus trichocarpa]	1688.99	2326.87	1320.74	1963.39	1679.27	2090.73	2763.93	1014.41	2329.61	1963.39	2192.62	1648.55	3	2	1	1	2	1				x	x	x		x
1	61.5	0.262605	0.455834	1.33316	0.173182	Mutant	Ctrl	147882	| PREDICTED: elongation factor 2-like [Cucumis sativus]	22.5056	31.3311	28.2064	37.5707	46.559	25.2472	36.829	13.6589	49.7524	37.5707	60.7919	19.9076	0	0	0	0	1	0				x		x		x
3	111.92	0.0125847	0.104685	1.46628	0.888729	Mutant	Ctrl	82815	| hypothetical protein MIMGU_mgv1a011184mg [Erythranthe guttata]	585.678	680.252	521.39	942.984	803.641	874.087	958.425	296.558	919.664	942.984	1049.31	689.223	0	0	0	2	1	3	x			x	x	x		x
4	164.84	0.000504672	0.0166609	2.72481	1	Mutant	Ctrl	34681	| _	1021.9	851.438	749.954	2451.77	2199.45	2496.75	1672.28	371.188	1322.82	2451.77	2871.81	1968.7	3	0	1	1	2	0	x	x	x	x	x	x		x
3	267.77	0.000564999	0.0177643	1.71449	1	Mutant	Ctrl	59022	| hypothetical protein MIMGU_mgv1a011254mg [Erythranthe guttata]	525.069	556.829	480.338	949.928	877.813	850.689	859.242	242.752	847.254	949.928	1146.16	670.773	3	1	2	2	4	1	x		x	x	x	x		x
2	143.83	0.208353	0.413031	1.30758	0.213031	Mutant	Ctrl	37589	| PREDICTED: uncharacterized protein LOC102601883 [Solanum tuberosum]	430.952	498.077	268.691	541.09	568.74	456.287	705.225	217.138	473.935	541.09	742.602	359.785	1	1	1	3	1	0				x	x	x		x
7	1149.8	0.37669	0.526321	1.29724	0.121307	Mutant	Ctrl	62635	| Oxygen-evolving enhancer protein 2 [Morus notabilis]	24191.3	65728.5	21196.1	47073.4	37455.7	59615.2	39587.6	28654.6	37387.1	47073.4	48905.8	47006.9	7	6	13	5	8	5				x	x	x		x
2	71.77	0.566974	0.587073	1.09555	0.0778066	Mutant	Ctrl	33167	| hypothetical protein MIMGU_mgv1a012187mg [Erythranthe guttata]	807.351	957.243	479.747	828.864	772.827	857.089	1321.18	417.313	846.212	828.864	1009.08	675.82	2	1	0	2	0	0				x	x	x		x
2	98.69	0.49694	0.557014	1.20749	0.0900077	Mutant	Ctrl	82189	| hypothetical protein MIMGU_mgv1a003794mg [Erythranthe guttata]	113.41	148.794	44.7362	153.997	117.97	98.6611	185.588	64.8674	78.9089	153.997	154.034	77.7948	2	0	1	1	0	1				x	x	x		x
1	57.98	0.0244169	0.137792	2.48477	0.749709	Mutant	Ctrl	42087	| unknown [Lotus japonicus]	156.827	86.6631	224.899	377.402	379.557	406.882	256.638	37.7811	396.693	377.402	495.586	320.829	0	0	0	1	1	2	x	x	x	x		x		x
2	202.95	0.745698	0.640008	1.0348	0.0586031	Mutant	Ctrl	37332	| hypothetical protein EUGRSUZ_H04126 [Eucalyptus grandis]	761.038	1393.4	456.371	988.745	683.277	1029.65	1245.39	607.459	804.98	988.745	892.152	811.882	1	1	1	2	1	2				x	x	x		x
6	359.1	0.0265338	0.144674	1.50332	0.72878	Mutant	Ctrl	99246	| hypothetical protein MIMGU_mgv1a004898mg [Erythranthe guttata]	1322.92	1345.37	957.335	1753.74	1697.05	1999.7	2164.87	586.52	1688.61	1753.74	2215.83	1576.77	2	1	0	4	4	4	x		x	x	x	x		x
3	104.9	0.843631	0.656689	1.01136	0.0531477	Mutant	Ctrl	40161	| Ras-related protein Rab11D [Morus notabilis]	1076.42	1436.21	1106.4	1179.02	1232.84	1248.3	1761.5	626.121	1951.54	1179.02	1609.72	984.288	2	0	3	1	1	1				x	x	x		x
1	63.07	0.0166117	0.117124	1.8	0.837344	Mutant	Ctrl	49750	| hypothetical protein MIMGU_mgv1a007993mg [Erythranthe guttata]	112.971	154.352	91.5438	210.828	208.597	226.536	184.871	67.2903	161.471	210.828	272.364	178.625	0	0	0	0	1	0	x		x	x		x		x
9	436.9	0.853197	0.656689	1.01647	0.052768	Mutant	Ctrl	81018	| unnamed protein product [Coffea canephora]	2668.37	3269.7	3216.98	2899.67	2939.44	3466.77	4366.63	1425.44	5674.34	2899.67	3838.02	2733.57	7	4	7	6	9	6				x	x	x		x
3	123.27	0.872372	0.656689	1.02333	0.0520833	Mutant	Ctrl	44641	| hypothetical protein MIMGU_mgv1a012437mg [Erythranthe guttata]	702.047	747.569	723.979	877.322	674.362	672.611	1148.86	325.905	1277	877.322	880.513	530.358	4	1	3	2	2	3				x	x	x		x
1	60.95	0.757622	0.640008	1.20593	0.0577769	Mutant	Ctrl	50470	| hypothetical protein ARALYDRAFT_480985 [Arabidopsis lyrata subsp. lyrata]	34.8193	9.70291	51.0474	37.4604	63.7544	14.0354	56.9796	4.23002	90.041	37.4604	83.2439	11.067	0	0	0	1	0	0				x		x		x
3	617.04	0.12857	0.329928	1.4216	0.312356	Mutant	Ctrl	49971	| hypothetical protein MIMGU_mgv1a009579mg [Erythranthe guttata]	801.182	776.962	774.466	1256.24	1314.54	773.677	1311.08	338.72	1366.06	1256.24	1716.39	610.049	1	0	2	0	4	0				x	x	x		x
3	778.09	0.120037	0.323496	1.73341	0.328175	Mutant	Ctrl	48190	| glyceraldehyde 3-phosphate dehydrogenase [Mikania micrantha]	708.051	423.927	1025.54	1096.9	1645.89	997.084	1158.68	184.813	1808.92	1096.9	2149.03	786.206	2	0	0	3	3	1			x	x	x	x		x
3	605.23	0.391795	0.534424	1.22747	0.116409	Mutant	Ctrl	63592	| glyceraldehyde-3-phosphate dehydrogenase C [Scoparia dulcis]	2495.73	2744.61	2913.66	3287.28	4362.86	2358.61	4084.1	1196.52	5139.32	3287.28	5696.58	1859.78	3	2	2	2	5	3				x	x	x		x
4	176.76	0.456055	0.552654	1.12877	0.0989013	Mutant	Ctrl	66779	| unknown [Populus trichocarpa]	1757.77	2815.9	1671.94	2413.15	2077.26	2559.47	2876.48	1227.6	2949.09	2413.15	2712.28	2018.16	2	3	5	5	5	4				x	x	x		x
2	271.32	0.00136624	0.0294162	1.92024	0.999857	Mutant	Ctrl	50269	| PREDICTED: cysteine proteinase inhibitor 12-like [Cicer arietinum]	1257.76	1367.76	1069.43	2426.46	2181.4	2487.31	2058.24	596.28	1886.34	2426.46	2848.25	1961.26	2	0	2	2	2	3	x		x	x	x	x		x
1	67.68	0.544712	0.576584	1.19959	0.0813228	Mutant	Ctrl	66921	| L-lactate dehydrogenase A-like [Solanum lycopersicum]	234.956	4.88102	149.89	162.697	248.533	56.2841	384.49	2.1279	264.387	162.697	324.509	44.3803	0	0	0	0	1	0				x		x		x
1	128.91	0.68839	0.61687	1.09351	0.0632763	Mutant	Ctrl	38249	| hypothetical protein MIMGU_mgv1a014188mg [Erythranthe guttata]	607.69	1051.59	554.396	771.47	613.447	1035.76	994.446	458.447	977.882	771.47	800.976	816.704	3	1	2	2	2	2				x		x		x
1	98.69	0.206513	0.410703	1.52229	0.21466	Mutant	Ctrl	35493	| hypothetical protein L484_022675 [Morus notabilis]	1420.8	451.32	1016.28	1386.04	1651.43	1359.5	2325.04	196.755	1792.59	1386.04	2156.27	1071.98	0	0	0	1	1	0			x	x		x		x
4	192.39	0.638437	0.60828	1.17788	0.0684061	Mutant	Ctrl	160909	| anganese superoxide dismutase [Sesamum indicum]	706.614	912.423	858.128	748.919	734.426	1434.46	1156.33	397.774	1513.63	748.919	958.939	1131.08	3	0	1	1	3	1				x	x	x		x
1	285.68	0.45776	0.552654	1.23237	0.0984996	Mutant	Ctrl	26559	| RecName: Full=Superoxide dismutase [Mn]	36.961	33.5106	17.7523	45.5248	26.0257	37.174	60.4844	14.6091	31.3128	45.5248	33.9817	29.3119	1	0	0	0	0	0				x		x		x
1	121.02	0.142914	0.352095	1.46853	0.288783	Mutant	Ctrl	39760	| RAN_BRUMA GTP-binding nuclear protein RAN/TC4 [Fusarium graminearum PH-1]	836.116	1402.35	606.678	1386.19	1369.11	1422.87	1368.25	611.36	1070.1	1386.19	1787.64	1121.94	0	1	0	1	1	0				x		x		x
4	127.35	0.499703	0.557014	1.09872	0.0894588	Mutant	Ctrl	78303	| hypothetical protein EUGRSUZ_I02364 [Eucalyptus grandis]	1512.55	2324.79	1559.66	1928.48	1808.85	2192.49	2475.19	1013.5	2751.04	1928.48	2361.81	1728.79	0	1	0	1	2	2				x	x	x		x
3	79	0.0806785	0.26241	1.29218	0.426807	Mutant	Ctrl	47614	| hypothetical protein MIMGU_mgv1a011404mg [Erythranthe guttata]	749.293	793.848	631.075	1079.55	924.669	805.267	1226.17	346.081	1113.13	1079.55	1207.34	634.957	1	1	0	0	2	1				x	x	x		x
1	94.73	0.628519	0.604061	1.08902	0.0695558	Mutant	Ctrl	48412	| hypothetical protein MIMGU_mgv1a011358mg [Erythranthe guttata]	33.7571	10.7981	34.779	29.7503	31.9061	24.7398	55.2413	4.70746	61.3456	29.7503	41.6597	19.5075	1	0	0	0	0	0				x		x		x
3	137.65	0.438937	0.552037	1.43645	0.1031	Mutant	Ctrl	46408	| hypothetical protein MIMGU_mgv1a012719mg [Erythranthe guttata]	124.224	98.3873	291.671	297.944	319.964	120.833	203.284	42.8923	514.47	297.944	417.776	95.2776	1	0	2	1	1	0				x	x	x		x
2	162.63	0.00765118	0.0813127	4.01961	0.952875	Mutant	Ctrl	46421	| cyclophilin [Momordica charantia]	330.358	152.301	345.469	1263.45	1194.93	870.368	540.61	66.3962	609.363	1263.45	1560.22	686.29	1	0	1	3	3	0	x	x	x	x	x	x		x
2	211.34	0.344789	0.510393	1.24026	0.132874	Mutant	Ctrl	32192	| dehydrin-like protein Dh2 [Paraboea crassifolia]	223.505	118.224	126.097	236.441	179.134	164.649	365.752	51.5402	222.418	236.441	233.895	129.826	0	0	1	0	0	1				x	x	x		x
6	145.16	0.10234	0.293375	1.30164	0.366392	Mutant	Ctrl	157947	| hypothetical protein MIMGU_mgv1a005614mg [Erythranthe guttata]	1251.37	1611	1303.22	1666.14	1592.94	2163	2047.79	702.322	2298.7	1666.14	2079.9	1705.54	3	0	3	1	3	0				x	x	x		x
4	98.84	0.68161	0.616716	1.02685	0.0639113	Mutant	Ctrl	52765	| hypothetical protein MIMGU_mgv1a010507mg [Erythranthe guttata]	1934.64	2323.66	1835.74	2108.15	2066.14	2083.36	3165.91	1013.01	3238	2108.15	2697.75	1642.74	5	3	2	3	4	2				x	x	x		x
2	126.68	0.0549541	0.208531	2.46938	0.530656	Mutant	Ctrl	106283	| hypothetical protein MIMGU_mgv1a006647mg [Erythranthe guttata]	118.061	46.3161	151.195	225.554	238.103	315.611	193.2	20.1917	266.689	225.554	310.891	248.861	0	0	0	0	2	0		x	x	x	x	x		x
1	103.87	0.821353	0.654153	1.00964	0.0541333	Mutant	Ctrl	54432	| hypothetical protein MIMGU_mgv1a015025mg [Erythranthe guttata]	349.077	578.494	304.65	436.612	422.14	385.343	571.242	252.197	537.362	436.612	551.186	303.845	0	0	0	1	0	0				x		x		x
9	481.7	0.0745413	0.252395	1.62667	0.44768	Mutant	Ctrl	38775	| hypothetical protein EUGRSUZ_I00896 [Eucalyptus grandis]	5020.46	8485.09	4896.96	9582.35	8231.42	12120.9	8215.67	3699.11	8637.6	9582.35	10747.7	9557.44	6	2	4	3	7	2			x	x	x	x		x
1	100.52	0.0980988	0.287943	1.40184	0.376861	Mutant	Ctrl	32417	| hypothetical protein MIMGU_mgv1a015303mg [Erythranthe guttata]	422.325	323.7	574.975	576.193	642.697	632.936	691.108	141.118	1014.18	576.193	839.168	499.073	0	0	1	0	0	0				x		x		x
1	93.71	0.953739	0.682995	1.03387	0.0502707	Mutant	Ctrl	32468	| hypothetical protein CICLE_v10011402mg [Citrus clementina]	770.737	936.749	146.784	1062.1	741.216	113.771	1261.26	408.379	258.908	1062.1	967.804	89.7091	0	1	0	0	0	1				x		x		x
4	98.72	0.668674	0.61176	1.1274	0.0651745	Mutant	Ctrl	34300	| miraculin-like protein [Solanum palustre]	1778.38	1391.28	752.253	2054.27	1190.83	1176.46	2910.2	606.531	1326.88	2054.27	1554.86	927.648	2	0	1	2	3	2				x	x	x		x
1	298.16	0.00366936	0.0546929	1.93694	0.992358	Mutant	Ctrl	45202	| unnamed protein product [Coffea canephora]	400.976	316.399	406.246	641.023	712.866	822.502	656.173	137.935	716.565	641.023	930.788	648.548	0	0	1	0	0	0	x		x	x		x		x
2	79.93	0.74873	0.640008	1.04104	0.0583885	Mutant	Ctrl	56729	| hypothetical protein MIMGU_mgv1a007840mg [Erythranthe guttata]	634.087	868.426	791.964	898.828	681.568	808.245	1037.64	378.594	1396.92	898.828	889.921	637.306	0	0	1	1	0	0				x	x	x		x
3	194.96	0.753503	0.640008	1.03032	0.0580569	Mutant	Ctrl	68020	| Ribosomal protein L18 [Theobroma cacao]	2037.38	2463.48	1839.65	2079.79	2031.77	2421.19	3334.04	1073.96	3244.9	2079.79	2652.87	1909.12	3	2	0	2	5	0				x	x	x		x
4	141.25	0.160351	0.372797	1.25729	0.264257	Mutant	Ctrl	54755	| hypothetical protein MIMGU_mgv1a004387mg [Erythranthe guttata]	700.333	500.886	775.556	909.913	768.161	807.308	1146.05	218.363	1367.98	909.913	1002.99	636.567	1	0	1	3	2	0				x	x	x		x
2	348.5	0.500267	0.557014	1.14573	0.0893474	Mutant	Ctrl	58066	| putative dienelactone hydrolase family protein [Salvia miltiorrhiza]	622.216	684.197	410.256	763.41	689.791	513.642	1018.22	298.278	723.639	763.41	900.658	405.01	1	0	0	1	2	0				x	x	x		x
4	233.07	0.0994312	0.287943	1.13853	0.37351	Mutant	Ctrl	46038	| hypothetical protein MIMGU_mgv1a011846mg [Erythranthe guttata]	2818.75	3045.65	2531.3	3094.63	3382.18	3081.92	4612.71	1327.76	4464.89	3094.63	4416.11	2430.11	3	1	3	1	2	2				x	x	x		x
7	1160.58	0.266486	0.455834	1.2443	0.170828	Mutant	Ctrl	157409	| calcineurin B-like interacting protein kinase [Nicotiana tabacum]	5396.3	8686.05	4550.97	8014.38	7086.31	8084.81	8830.7	3786.72	8027.32	8014.38	9252.57	6374.92	1	0	1	3	2	0				x	x	x		x
1	100.45	0.717599	0.625984	1.06921	0.0607442	Mutant	Ctrl	94973	| hypothetical protein MIMGU_mgv1a000333mg [Erythranthe guttata]	244.401	320.399	201.107	326.587	277.61	214.72	399.947	139.679	354.726	326.587	362.475	169.308	0	0	0	1	1	1				x		x		x
1	208.13	0.357095	0.51256	1.52237	0.1282	Mutant	Ctrl	102085	| hypothetical protein MIMGU_mgv1a001876mg [Erythranthe guttata]	47.4458	32.9198	2.7019	52.333	35.2777	38.8488	77.642	14.3515	4.76581	52.333	46.062	30.6325	1	0	0	0	0	0			x	x		x		x
4	261.68	0.176615	0.387206	1.51799	0.244611	Mutant	Ctrl	56285	| hypothetical protein CICLE_v10013512mg [Citrus clementina]	578.429	1013.32	808.538	1005.54	939.432	1698.62	946.562	441.758	1426.16	1005.54	1226.61	1339.37	1	1	3	4	3	3			x	x	x	x		x
2	49.17	0.469718	0.552654	1.32982	0.0957608	Mutant	Ctrl	58932	| hypothetical protein M569_07007 [Genlisea aurea]	77.6356	61.3683	33.6006	109.726	46.134	73.6735	127.046	26.7537	59.2671	109.726	60.237	58.092	1	0	0	1	0	1				x	x	x		x
1	279.13	0.495496	0.557014	1.1637	0.0902972	Mutant	Ctrl	59138	| hypothetical protein MIMGU_mgv1a007445mg [Erythranthe guttata]	220.266	134.71	224.153	210.902	283.146	179.885	360.452	58.7272	395.377	210.902	369.702	141.84	1	0	0	1	1	1				x		x		x
2	158.79	0.113801	0.313812	1.23901	0.340733	Mutant	Ctrl	29520	| hypothetical protein MIMGU_mgv1a014752mg [Erythranthe guttata]	997.867	1411.13	1037.98	1433.3	1361.18	1476.38	1632.95	615.187	1830.86	1433.3	1777.29	1164.13	1	0	1	0	2	1				x	x	x		x
1	204.45	0.114543	0.313812	2.97234	0.339192	Mutant	Ctrl	65848	| hypothetical protein MIMGU_mgv1a024330mg [Erythranthe guttata]	508.761	685.748	67.8553	1240.53	1396.19	1115.46	832.555	298.954	119.688	1240.53	1823	879.548	0	0	0	1	1	0		x	x	x		x		x
2	246.82	0.603599	0.597331	1.09924	0.0726554	Mutant	Ctrl	50981	| hypothetical protein MIMGU_mgv1a012555mg [Erythranthe guttata]	856.464	1783.98	969.15	1172.93	1204.01	1590.88	1401.55	777.734	1709.45	1172.93	1572.08	1254.42	1	2	1	2	1	1				x	x	x		x
2	350.03	0.0275633	0.146767	1.08675	0.719008	Mutant	Ctrl	87721	| hypothetical protein MIMGU_mgv1a003536mg [Erythranthe guttata]	1358.7	1412.66	1334.14	1538.35	1448.58	1474.72	2223.43	615.853	2353.24	1538.35	1891.4	1162.82	0	1	1	1	2	2	x			x	x	x		x
2	100.84	0.994312	0.687172	1.00468	0.0500041	Mutant	Ctrl	90603	| PREDICTED: proteasome subunit alpha type-4-like [Cucumis sativus]	170.395	172.441	160.491	158.439	152.802	194.44	278.841	75.1764	283.084	158.439	199.513	153.317	0	0	2	0	0	0				x	x	x		x
2	225	0.388524	0.532219	1.12104	0.117441	Mutant	Ctrl	75480	| unnamed protein product [Coffea canephora]	595.662	804.601	505.227	735.259	691.111	709.75	974.763	350.769	891.154	735.259	902.382	559.642	3	1	1	0	1	1				x	x	x		x
1	174.3	0.0916332	0.277533	1.41059	0.393993	Mutant	Ctrl	123073	| rps3 gene product (chloroplast) [Sesamum indicum]	137.648	141.802	190.714	190.743	198.662	273.804	225.252	61.8192	336.395	190.743	259.393	215.896	0	0	0	0	0	1				x		x		x
2	93.54	0.00147309	0.0294737	1.72676	0.99979	Mutant	Ctrl	126584	| hypothetical protein MIMGU_mgv1a026364mg [Erythranthe guttata]	571.409	654.829	595.043	1065.84	1140.63	938.437	935.075	285.475	1049.58	1065.84	1489.32	739.963	0	0	0	1	0	1	x		x	x	x	x		x
1	139.3	0.370501	0.524077	1.10968	0.123415	Mutant	Ctrl	29276	| PREDICTED: pathogenesis-related protein STH-2 [Vitis vinifera]	503.897	599.868	414.852	604.831	537.946	542.408	824.596	261.514	731.745	604.831	702.394	427.692	1	0	1	1	1	1				x		x		x
4	170.91	0.491102	0.556929	1.06577	0.0911881	Mutant	Ctrl	169173	| hypothetical protein MIMGU_mgv1a005575mg [Erythranthe guttata]	2863.44	3443.44	2481.59	3180.71	3039.15	3146.62	4685.84	1501.18	4377.2	3180.71	3968.21	2481.12	2	1	0	4	0	2				x	x	x		x
3	54.84	0.349478	0.511498	1.24072	0.131059	Mutant	Ctrl	102991	| hypothetical protein CARUB_v10020132mg [Capsella rubella]	2036.36	3746.89	2084.43	3358.97	2576.6	3826	3332.37	1633.47	3676.67	3358.97	3364.26	3016.82	1	0	1	0	1	0				x	x	x		x
2	151.82	0.296109	0.484788	1.1008	0.154529	Mutant	Ctrl	74252	| pectinesterase [Genlisea aurea]	310.653	292.972	366.271	329.635	350.346	387.678	508.364	127.722	646.054	329.635	457.446	305.686	1	0	1	0	1	0				x	x	x		x
1	166.14	0.969962	0.684223	1.04072	0.050114	Mutant	Ctrl	146630	| _	2842.74	3546.04	2282.27	3523.42	3661.36	1839.33	4651.97	1545.91	4025.63	3523.42	4780.62	1450.32	0	0	0	0	0	1				x		x		x
5	119.08	0.793121	0.646263	1.02008	0.055592	Mutant	Ctrl	56184	| hypothetical protein MIMGU_mgv1a007270mg [Erythranthe guttata]	1358.84	1503.63	1424.59	1471.26	1312.11	1589.78	2223.66	655.515	2512.79	1471.26	1713.22	1253.55	1	2	2	3	3	1				x	x	x		x
6	155.27	0.466394	0.552654	1.13439	0.0965085	Mutant	Ctrl	183963	| hypothetical protein MIMGU_mgv1a015165mg [Erythranthe guttata]	3222.85	5197.97	3104.65	4631.4	3684.72	4758.29	5273.99	2266.08	5476.19	4631.4	4811.13	3751.94	5	4	4	5	5	6				x	x	x		x
2	320.38	0.377045	0.526321	1.13399	0.121188	Mutant	Ctrl	67900	| hypothetical protein MIMGU_mgv1a011423mg [Erythranthe guttata]	1390.13	1900.72	1419.95	1715.98	1560.19	2065.85	2274.85	828.626	2504.6	1715.98	2037.13	1628.94	2	1	3	2	2	1				x	x	x		x
1	330.98	0.571476	0.588652	1.15936	0.0771324	Mutant	Ctrl	71171	| hypothetical protein MIMGU_mgv1a005785mg [Erythranthe guttata]	111.317	44.4811	140.465	148.341	104.766	90.3684	182.163	19.3917	247.762	148.341	136.792	71.256	0	0	0	0	1	1				x		x		x
4	377.89	0.0473747	0.193631	1.4365	0.571879	Mutant	Ctrl	82689	| hypothetical protein MIMGU_mgv1a010546mg [Erythranthe guttata]	1545.83	1240.42	1857.56	2029.83	2488.25	2152.76	2529.66	540.765	3276.49	2029.83	3248.9	1697.46	1	3	2	2	3	3	x			x	x	x		x
2	115.75	0.0372292	0.173537	1.38395	0.638635	Mutant	Ctrl	56216	| hypothetical protein M569_02017 [Genlisea aurea]	472.775	428.152	538.053	714.971	560.14	716.362	773.667	186.654	949.055	714.971	731.373	564.856	0	1	1	2	1	2	x			x	x	x		x
6	205.7	0.538885	0.575811	1.07563	0.0822957	Mutant	Ctrl	54521	| hypothetical protein MIMGU_mgv1a009175mg [Erythranthe guttata]	1185.59	1432.31	997.827	1216.43	1220.48	1452.29	1940.15	624.42	1760.04	1216.43	1593.58	1145.14	4	0	4	0	2	0				x	x	x		x
2	100.63	0.714444	0.625676	1.04536	0.0610023	Mutant	Ctrl	84294	| hypothetical protein MIMGU_mgv1a012010mg [Erythranthe guttata]	518.604	819.023	521.582	701.41	570.504	671.634	848.663	357.056	920.003	701.41	744.905	529.587	1	1	0	1	1	1				x	x	x		x
12	749.88	0.1526	0.367724	1.17684	0.274666	Mutant	Ctrl	62937	| unnamed protein product [Coffea canephora]	5329.21	5980.59	5842.04	6222.61	7868.01	6094.4	8720.92	2607.26	10304.6	6222.61	10273.2	4805.47	10	6	8	9	13	9				x	x	x		x
1	324.87	0.0370211	0.173537	1.37673	0.640173	Mutant	Ctrl	59831	| monodehydroascorbate reductase [Acanthus ebracteatus]	343.873	263.175	322.957	452.899	455.364	372.105	562.726	114.732	569.655	452.899	594.568	293.407	1	0	1	1	1	1	x			x		x		x
5	654.51	0.599421	0.597331	1.05809	0.073206	Mutant	Ctrl	45905	| hypothetical protein MIMGU_mgv1a010549mg [Erythranthe guttata]	3001.32	4159.4	2836.62	3742.86	3453.22	3381.98	4911.47	1813.3	5003.43	3742.86	4508.86	2666.71	5	1	6	5	6	2				x	x	x		x
4	79.39	0.683719	0.616716	1.09522	0.0637118	Mutant	Ctrl	46257	| small heat shock protein 22.5MTI [Boea hygrometrica]	1353.26	2833.59	2186.65	2445.86	1716.96	2817.59	2214.53	1235.31	3856.97	2445.86	2241.83	2221.69	2	1	0	1	2	1				x	x	x		x
1	1714.46	0.48892	0.556929	1.28416	0.0916365	Mutant	Ctrl	43109	| Chlorophyll a-b binding protein 40 [Morus notabilis]	205.331	9.28113	257.378	116.245	324.408	165.46	336.011	4.04614	453.982	116.245	423.578	130.466	0	0	1	0	2	0				x		x		x
4	182.14	0.5988	0.597331	1.09176	0.0732886	Mutant	Ctrl	101890	| PREDICTED: protein disulfide isomerase-like 2-1-like [Solanum lycopersicum]	2230.11	5398.58	1517.82	3176.35	2795.53	4013.92	3649.44	2353.53	2677.23	3176.35	3650.11	3165	4	3	2	3	6	4				x	x	x		x
2	263.8	0.933362	0.675731	1.2995	0.0505627	Mutant	Ctrl	106894	| unnamed protein product [Coffea canephora]	82.3701	42.2728	62.6258	115.832	106.891	20.6332	134.793	18.429	110.464	115.832	139.567	16.2694	1	0	0	1	1	0				x	x	x		x
3	171.19	0.457793	0.552654	1.20173	0.0984918	Mutant	Ctrl	61566	| PREDICTED: FAM10 family protein At4g22670-like [Solanum lycopersicum]	444.929	823.976	221.756	565.063	546.426	679.879	728.098	359.215	391.149	565.063	713.467	536.088	1	1	0	1	2	0				x	x	x		x
1	71.19	0.227574	0.429358	2.60434	0.197231	Mutant	Ctrl	52809	| hypothetical protein MIMGU_mgv1a012325mg [Erythranthe guttata]	15.9708	0	38.7005	32.2867	63.8254	46.2704	26.1352	0	68.2626	32.2867	83.3366	36.4844	0	0	0	0	1	0		x	x	x		x		x
2	1214.9	0.202792	0.409487	1.30098	0.218023	Mutant	Ctrl	35000	| chlorophyll a/b binding protein [Panax ginseng]	4810.21	8593.91	5511.46	7176.3	8155.26	9277.19	7871.61	3746.55	9721.49	7176.3	10648.3	7315.12	1	0	1	0	2	0				x	x	x		x
4	178.51	0.0290566	0.149884	1.408	0.705285	Mutant	Ctrl	31747	| PREDICTED: 60S ribosomal protein L24 [Prunus mume]	1464.14	1393.81	1894.41	2038.84	2307.92	2344.59	2395.97	607.636	3341.5	2038.84	3013.44	1848.72	1	1	2	2	3	3	x			x	x	x		x
5	1313.46	0.451081	0.552654	1.10384	0.10009	Mutant	Ctrl	124707	| hypothetical protein MIMGU_mgv1a003983mg [Erythranthe guttata]	1779.17	2278.43	2085.44	1980.39	2134.69	2665.86	2911.51	993.289	3678.44	1980.39	2787.25	2102.04	3	2	2	3	3	3				x	x	x		x
3	1116.82	0.400269	0.538246	1.09292	0.113807	Mutant	Ctrl	81208	| hypothetical protein MIMGU_mgv1a003983mg [Erythranthe guttata]	2413.01	3032.05	2692.33	2592.08	3251.87	3049.59	3948.74	1321.83	4748.93	2592.08	4245.96	2404.62	5	3	4	4	4	4				x	x	x		x
1	215.18	0.177362	0.387206	1.24964	0.243772	Mutant	Ctrl	44159	| 14-3-3 protein 4 [Morus notabilis]	399.439	270.935	411.093	430.213	500.273	420.961	653.656	118.115	725.114	430.213	653.205	331.93	0	0	1	0	0	0				x		x		x
1	241.69	0.163022	0.376049	1.25481	0.260836	Mutant	Ctrl	352028	| tubulin beta chain family protein [Populus trichocarpa]	617.591	715.967	529.577	845.805	858.716	633.365	1010.65	312.129	934.104	845.805	1121.22	499.412	0	0	1	1	0	0				x		x		x
9	1288.13	0.447644	0.552654	1.11278	0.100926	Mutant	Ctrl	213896	| glyceraldehyde-3-phosphate dehydrogenase A [Scoparia dulcis]	7891.46	9229.96	7875.02	8663.98	11229.6	7922.06	12913.9	4023.83	13890.5	8663.98	14662.4	6246.59	11	6	11	9	18	10				x	x	x		x
3	357.83	0.00800786	0.0813127	1.2258	0.948463	Mutant	Ctrl	174230	| hypothetical protein [Escherichia coli]	979.032	1073.06	1098.14	1319.91	1311.47	1230.19	1602.13	467.804	1936.98	1319.91	1712.38	970.012	0	0	1	1	1	2	x			x	x	x		x
2	75.33	0.355912	0.511974	1.2345	0.128637	Mutant	Ctrl	36717	| _	5242.43	9263.09	4205.56	8084.1	6464.6	8550.09	8578.9	4038.28	7418.06	8084.1	8440.81	6741.8	1	2	2	2	3	2				x	x	x		x
3	500.58	0.457393	0.552654	1.12274	0.0985859	Mutant	Ctrl	44833	| unnamed protein product [Coffea canephora]	2125.58	3214.74	2106.03	3129.64	2412.49	2818.16	3478.38	1401.48	3714.75	3129.64	3149.98	2222.14	2	1	2	2	3	2				x	x	x		x
7	218.42	0.352564	0.511974	1.33955	0.129888	Mutant	Ctrl	68056	| Allene oxide synthase [Morus notabilis]	5770.89	1563.33	3254.29	4096.02	5826.24	4261.58	9443.7	681.54	5740.15	4096.02	7607.31	3360.28	4	0	3	1	3	1				x	x	x		x
3	181	0.771074	0.640008	1.03029	0.0569015	Mutant	Ctrl	119585	| PREDICTED: beta-galactosidase 8-like isoform 1 [Glycine max]	1538.1	2363.84	1348.56	1914.41	1592.41	1902.69	2517	1030.52	2378.68	1914.41	2079.2	1500.28	2	2	2	1	2	1				x	x	x		x
3	70.08	0.718621	0.625984	1.23498	0.0606614	Mutant	Ctrl	68706	| hypothetical protein MIMGU_mgv1a005758mg [Erythranthe guttata]	685.763	775.447	571.087	430.574	812.069	1267.21	1122.21	338.059	1007.32	430.574	1060.32	999.201	0	0	1	2	2	2				x	x	x		x
1	188.19	0.608232	0.599462	1.52209	0.0720555	Mutant	Ctrl	40479	| unnamed protein product [Vitis vinifera]	13.291	12.1362	7.69974	21.0322	5.60661	23.7834	21.7499	5.2908	13.5813	21.0322	7.32053	18.7533	0	0	1	0	0	0			x	x		x		x
1	182.31	0.0732575	0.249555	2.16698	0.452308	Mutant	Ctrl	62478	| hypothetical protein MIMGU_mgv1a006812mg [Erythranthe guttata]	48.1276	106.643	34.6483	121.73	113.103	175.635	78.7578	46.4914	61.115	121.73	147.678	138.489	0	0	0	1	1	0		x	x	x		x		x
1	60.01	0.259452	0.455834	2.43766	0.175135	Mutant	Ctrl	59912	| hypothetical protein MIMGU_mgv1a009621mg [Erythranthe guttata]	21.0174	0	26.535	23.4428	54.4283	38.0454	34.3937	0	46.8042	23.4428	71.0668	29.999	0	0	1	0	0	0		x	x	x		x		x
11	280.5	0.897927	0.662425	1.02384	0.0513264	Mutant	Ctrl	78795	| UDP-glucose pyrophosphorylase [Paulownia sp. ZKC-2008]	3386.08	2362.69	3929.37	3118.49	4156.58	2633.82	5541.1	1030.02	6930.9	3118.49	5427.23	2076.78	6	1	6	3	5	1				x	x	x		x
1	1115.73	0.351247	0.511957	1.54207	0.130385	Mutant	Ctrl	189634	| hypothetical protein JCGZ_16190 [Jatropha curcas]	340.222	526.797	15.7254	423.485	484.323	453.45	556.752	229.659	27.7375	423.485	632.38	357.548	2	0	0	1	2	1			x	x		x		x
2	304.96	0.406384	0.540971	1.28542	0.11199	Mutant	Ctrl	39261	| hypothetical protein MIMGU_mgv1a011597mg [Erythranthe guttata]	399.735	205.437	556.662	467.217	645.726	380.498	654.141	89.5608	981.88	467.217	843.123	300.025	2	0	1	1	0	0				x	x	x		x
5	95.44	0.0378473	0.173537	1.35693	0.634112	Mutant	Ctrl	87374	| hypothetical protein MIMGU_mgv1a003892mg [Erythranthe guttata]	1037.54	1340.77	1097.14	1566.29	1401.67	1747.97	1697.86	584.513	1935.22	1566.29	1830.16	1378.28	1	0	0	4	2	2	x			x	x	x		x
7	117.23	0.00777861	0.0813127	1.20604	0.951308	Mutant	Ctrl	91067	| PREDICTED: guanosine nucleotide diphosphate dissociation inhibitor 1 [Prunus mume]	3360.72	3163.52	3103.01	4086.3	3824.58	3699.94	5499.61	1379.15	5473.31	4086.3	4993.75	2917.43	0	1	1	2	2	1	x			x	x	x		x
6	167.09	0.857259	0.656689	1.01879	0.0526144	Mutant	Ctrl	375745	| SPINDLY [Sinningia speciosa]	5432.38	8825.03	5476.39	6337.76	5770.4	7996.39	8889.75	3847.3	9659.64	6337.76	7534.4	6305.2	4	2	1	1	2	3				x	x	x		x
4	240.26	0.809714	0.651748	1.04839	0.0547057	Mutant	Ctrl	79731	| Hop-interacting protein THI032 [Solanum lycopersicum]	842.268	657.824	802.683	754.68	1001.43	658.092	1378.32	286.781	1415.83	754.68	1307.56	518.909	2	0	3	2	1	1				x	x	x		x
2	90.56	0.608611	0.599462	1.0783	0.072007	Mutant	Ctrl	85873	| unnamed protein product [Coffea canephora]	233.418	307.388	197.917	293.366	279.892	223.308	381.973	134.007	349.1	293.366	365.455	176.079	0	1	1	0	0	0				x	x	x		x
1	76.58	0.893795	0.661595	1.03732	0.0514369	Mutant	Ctrl	104568	| hypothetical protein MIMGU_mgv1a002197mg [Erythranthe guttata]	104.047	62.5022	77.8271	99.7858	94.9091	58.8014	170.267	27.248	137.277	99.7858	123.923	46.3653	0	0	0	1	0	0				x		x		x
1	90.31	0.888444	0.659302	1.23853	0.0515868	Mutant	Ctrl	63637	| hypothetical protein MIMGU_mgv1a007743mg [Erythranthe guttata]	6.64311	0	7.33839	0.586899	13.1707	3.55896	10.871	0	12.944	0.586899	17.1969	2.80626	0	0	0	0	1	0				x		x		x
3	203	0.759723	0.640008	1.03076	0.0576363	Mutant	Ctrl	93083	| hypothetical protein M569_01551 [Genlisea aurea]	1115.48	1714.5	1125.24	1396.68	1235.07	1445.13	1825.41	747.441	1984.77	1396.68	1612.63	1139.49	1	0	1	1	0	0				x	x	x		x
3	81.54	0.268215	0.455866	1.08848	0.169797	Mutant	Ctrl	74978	| hypothetical protein MIMGU_mgv1a005945mg [Erythranthe guttata]	837.789	1001.99	819.499	956.312	926.422	1011.83	1370.99	436.821	1445.49	956.312	1209.63	797.833	0	0	2	0	1	1				x	x	x		x
2	161.68	0.00652862	0.0798263	1.84813	0.966148	Mutant	Ctrl	92632	| hypothetical protein MIMGU_mgv1a025482mg [Erythranthe guttata]	162.034	137.413	186.362	253.89	319.905	324.044	265.159	59.9057	328.718	253.89	417.699	255.511	0	0	1	0	1	1	x		x	x	x	x		x
9	1751.72	0.507739	0.558892	1.04937	0.0878964	Mutant	Ctrl	319484	| PREDICTED: photosystem II CP47 chlorophyll apoprotein-like [Solanum lycopersicum]	5002.28	4980.95	5770.95	5082.71	5490.45	5958.79	8185.92	2171.46	10179.2	5082.71	7168.87	4698.54	7	4	4	6	5	4				x	x	x		x
1	97.77	0.460836	0.552654	1.41478	0.097782	Mutant	Ctrl	45980	| PREDICTED: photosystem II CP47 chlorophyll apoprotein-like [Solanum lycopersicum]	58.2776	53.6816	166.739	92.7699	82.4772	219.051	95.3676	23.4027	294.107	92.7699	107.69	172.723	0	0	0	0	0	1				x		x		x
1	116.33	0.261109	0.455834	1.57337	0.174104	Mutant	Ctrl	95700	| hypothetical protein MIMGU_mgv1a002903mg [Erythranthe guttata]	207.816	307.654	126.594	196.34	422.491	391.375	340.077	134.123	223.296	196.34	551.645	308.601	0	0	0	1	0	1			x	x		x		x
6	641.03	0.186267	0.392926	1.10266	0.234161	Mutant	Ctrl	102448	| unnamed protein product [Coffea canephora]	15965.3	19364.7	18835.9	19551.2	19485.6	20689.8	26126.2	8442.1	33224	19551.2	25442.2	16314	11	8	12	9	13	11				x	x	x		x
2	325.45	0.0967626	0.287789	1.52144	0.380281	Mutant	Ctrl	45741	| hypothetical protein MIMGU_mgv1a007950mg [Erythranthe guttata]	199.261	182.861	272.512	298.63	432.356	264.999	326.078	79.719	480.676	298.63	564.526	208.953	0	0	0	2	2	0			x	x	x	x		x
2	387.12	0.0563994	0.212792	1.21905	0.523478	Mutant	Ctrl	110074	| hypothetical protein MIMGU_mgv1a007950mg [Erythranthe guttata]	1609.18	2044.14	1738.27	2114.26	2316.43	2141.94	2633.33	891.149	3066.09	2114.26	3024.55	1688.93	0	0	0	1	1	2				x	x	x		x
1	61.38	0.433963	0.552037	1.32918	0.104378	Mutant	Ctrl	84716	| ADP-glucose pyrophosphorylase large subunit [Perilla frutescens]	14.3953	0	24.7806	10.7687	23.1147	18.1886	23.5571	0	43.7097	10.7687	30.1807	14.3418	0	0	1	0	0	0				x		x		x
4	388.4	0.26937	0.455866	1.0555	0.169115	Mutant	Ctrl	84944	| hypothetical protein MIMGU_mgv1a004049mg [Erythranthe guttata]	1901.69	1925.4	1775.19	1921.14	2102.86	1889.19	3112	839.385	3131.2	1921.14	2745.69	1489.64	2	0	2	1	3	0				x	x	x		x
3	266.81	3.90044e-05	0.00503675	2.48445	1	Mutant	Ctrl	73473	| hypothetical protein MIMGU_mgv1a004908mg [Erythranthe guttata]	171.308	163.142	156.939	403.94	381.319	435.571	280.335	71.1222	276.819	403.94	497.888	343.45	0	0	2	1	3	1	x	x	x	x	x	x		x
6	733.04	0.0162965	0.117124	1.61711	0.841233	Mutant	Ctrl	52335	| hypothetical protein MIMGU_mgv1a008737mg [Erythranthe guttata]	3031.68	2710.01	3383.51	4253.79	5921.97	4580.7	4961.15	1181.44	5968.07	4253.79	7732.29	3611.91	7	2	6	5	8	2	x		x	x	x	x		x
1	268.46	0.184548	0.392625	4.48077	0.235963	Mutant	Ctrl	46863	| ACC oxidase [Boea hygrometrica]	25.0157	0	44.0757	104.98	166.937	37.6662	40.9367	0	77.7439	104.98	217.969	29.7	0	0	0	0	1	0		x	x	x		x		x
3	97.31	0.811788	0.651748	1.01713	0.0546007	Mutant	Ctrl	94127	| hypothetical protein MIMGU_mgv1a011534mg [Erythranthe guttata]	779.313	817.776	596.01	757.77	708.168	764.727	1275.3	356.512	1051.28	757.77	924.653	602.991	2	1	0	0	1	0				x	x	x		x
5	100.27	0.341973	0.509336	1.37189	0.133984	Mutant	Ctrl	108965	| hypothetical protein MIMGU_mgv1a002731mg [Erythranthe guttata]	478.778	231.935	753.118	500.313	666.393	841.511	783.491	101.113	1328.4	500.313	870.107	663.536	0	0	2	1	0	2				x	x	x		x
2	98.1	0.81793	0.653229	1.02647	0.0542975	Mutant	Ctrl	41253	| hypothetical protein MIMGU_mgv1a015764mg [Erythranthe guttata]	563.88	810.019	542.272	670.255	561.655	734.984	922.755	353.131	956.496	670.255	733.351	579.539	2	0	1	0	0	0				x	x	x		x
5	433.88	0.000187804	0.0102843	3.91823	1	Mutant	Ctrl	28179	| unnamed protein product [Coffea canephora]	1525.22	1406.56	1798.79	5378.55	6227.38	6929.51	2495.92	613.193	3172.83	5378.55	8131.08	5463.96	3	3	2	4	4	4	x	x	x	x	x	x		x
1	909.65	0.241248	0.440022	1.22713	0.187192	Mutant	Ctrl	42756	| unnamed protein product [Coffea canephora]	134.102	109.84	99.3618	140.882	167.749	112.647	219.45	47.885	175.261	140.882	219.029	88.8225	1	1	0	1	0	0				x		x		x
1	228.38	0.097739	0.287943	1.19715	0.377776	Mutant	Ctrl	23510	| unnamed protein product [Coffea canephora]	86.1969	92.7935	75.796	91.0397	102.331	111.648	141.056	40.4537	133.694	91.0397	133.613	88.0355	0	0	0	0	1	0				x		x		x
1	368.41	0.25537	0.455709	1.49077	0.17772	Mutant	Ctrl	80606	| lipoamide dehydrogenase [Capsicum annuum]	249.139	143.672	203.581	346.9	364.849	177.332	407.7	62.6344	359.091	346.9	476.382	139.827	0	0	0	1	0	0				x		x		x
9	627.43	0.00721724	0.0813127	1.65724	0.958129	Mutant	Ctrl	177154	| hypothetical protein MIMGU_mgv1a006156mg [Erythranthe guttata]	3895.33	4761.98	4028.8	7178.79	6012.28	7832.9	6374.46	2076	7106.28	7178.79	7850.21	6176.29	6	3	4	6	2	4	x		x	x	x	x		x
6	374.92	0.578517	0.589395	1.15042	0.0761018	Mutant	Ctrl	71013	| hypothetical protein MIMGU_mgv1a003055mg [Erythranthe guttata]	5049.67	6856.14	7312.22	6351.07	5776.4	9981.38	8263.47	2988.96	12897.8	6351.07	7542.22	7870.38	4	1	1	2	4	1				x	x	x		x
6	1304.29	0.888701	0.659302	1.01165	0.0515794	Mutant	Ctrl	83789	| hypothetical protein MIMGU_mgv1a003263mg [Erythranthe guttata]	2657.68	4067.6	2860.53	3389.88	3568.94	2738.69	4349.13	1773.29	5045.6	3389.88	4659.95	2159.47	7	3	4	4	7	4				x	x	x		x
2	293.49	0.0110421	0.0985235	3.47747	0.909075	Mutant	Ctrl	29891	| hypothetical protein PRUPE_ppa011747mg [Prunus persica]	757.971	2037.89	969.658	4330.48	4136.05	4627.97	1240.37	888.427	1710.35	4330.48	5400.43	3649.18	1	0	1	3	3	2	x	x	x	x	x	x		x
1	501.43	0.00174296	0.0319671	13.4174	0.99953	Mutant	Ctrl	106184	| unnamed protein product [Coffea canephora]	236.493	85.9969	247.203	2375.36	2166.05	3102.39	387.005	37.4907	436.033	2375.36	2828.21	2446.25	0	0	0	2	3	1	x	x	x	x		x		x
7	144.5	0.774262	0.640008	1.03841	0.0567026	Mutant	Ctrl	77331	| PREDICTED: protein disulfide isomerase-like 1-4-like [Solanum tuberosum]	1125.55	1269.29	1953.64	1266.89	1736.59	1512.04	1841.89	553.352	3445.97	1266.89	2267.46	1192.25	3	0	4	1	0	2				x	x	x		x
1	41.72	0.965089	0.684223	1.15625	0.050154	Mutant	Ctrl	55262	| PREDICTED: afadin- and alpha-actinin-binding protein A isoform X1 [Prunus mume]	197.32	183.822	1.23272	239.738	201.083	1.30055	322.902	80.1378	2.17436	239.738	262.554	1.02549	0	0	0	1	0	0				x		x		x
6	164.04	0.0723345	0.24875	1.39506	0.455695	Mutant	Ctrl	65778	| ADP-ribosylation factor [Medicago truncatula]	1514.29	1089.46	1560.34	1851.34	2241.71	1716.11	2478.04	474.956	2752.24	1851.34	2926.99	1353.16	3	0	3	2	1	2				x	x	x		x
2	330.49	0.860448	0.656689	1.00348	0.0524971	Mutant	Ctrl	19813	| hypothetical protein MIMGU_mgv1a006438mg [Erythranthe guttata]	594.165	930.07	510.723	728.253	621.536	692.253	972.314	405.467	900.849	728.253	811.538	545.846	3	1	1	1	3	2				x	x	x		x
1	562.08	0.871495	0.656689	1.05114	0.0521125	Mutant	Ctrl	44839	| PREDICTED: enolase-like [Solanum lycopersicum]	1491.84	997.266	1393.02	1363.77	1746.43	970.448	2441.29	434.762	2457.1	1363.77	2280.31	765.204	1	0	2	0	1	0				x		x		x
2	214.27	0.401891	0.538246	1.11945	0.11332	Mutant	Ctrl	52389	| hypothetical protein M569_13176 [Genlisea aurea]	987.106	1408.58	909.764	1242.11	1153.07	1305.11	1615.34	614.075	1604.71	1242.11	1505.56	1029.08	0	0	0	0	1	1				x	x	x		x
2	521.53	0.55146	0.579793	1.0579	0.0802241	Mutant	Ctrl	82406	| Actin 7 isoform 1 [Theobroma DEAD/DEAH box RNA helicase family protein isoform 1 [Theobroma	1015.21	1210.03	902.956	1115.55	1176.7	1017.07	1661.32	527.515	1592.7	1115.55	1536.41	801.968	1	0	1	0	0	0				x	x	x		x
4	69.61	0.598359	0.597331	1.0603	0.0733473	Mutant	Ctrl	73447	| unnamed protein product [Coffea canephora]	1826.78	2684.36	1858.23	2391.05	2157.54	2204.89	2989.41	1170.26	3277.68	2391.05	2817.09	1738.57	2	1	2	3	2	2				x	x	x		x
3	95.91	0.868965	0.656689	1.01753	0.0521976	Mutant	Ctrl	85666	| hypothetical protein MIMGU_mgv1a003614mg [Erythranthe guttata]	716.932	928.562	338.146	941.368	572.996	504.042	1173.21	404.81	596.445	941.368	748.16	397.44	1	2	1	2	2	1				x	x	x		x
4	74.21	0.869479	0.656689	1.04782	0.0521802	Mutant	Ctrl	66770	| hypothetical protein MIMGU_mgv1a004908mg [Erythranthe guttata]	1179.02	1954.29	1616.39	1447.19	1293.89	2235.76	1929.4	851.978	2851.1	1447.19	1689.42	1762.91	3	2	2	4	3	2				x	x	x		x
4	169.35	0.574581	0.589093	1.13258	0.0766744	Mutant	Ctrl	74150	| unknown [Lotus japonicus]	1262.33	1465.74	633.841	1509.87	1280.2	1017.58	2065.73	638.995	1118.01	1509.87	1671.56	802.364	2	0	4	1	2	0				x	x	x		x
1	126.86	0.0307029	0.154749	1.26678	0.690749	Mutant	Ctrl	56336	| hypothetical protein MIMGU_mgv1a007176mg [Erythranthe guttata]	213.17	247.473	192.213	273.543	272.898	280.586	348.839	107.887	339.039	273.543	356.322	221.244	0	0	0	1	0	1	x			x		x		x
3	506.21	0.808643	0.651748	1.04033	0.0547604	Mutant	Ctrl	59312	| beta-actin [Sesamum indicum]	16749	83184.8	10321.7	22265.6	15570	76866.7	27408.7	36264.7	18206.2	22265.6	20329.7	60609.9	3	1	3	3	2	0				x	x	x		x
1	464.58	0.438381	0.552037	1.1249	0.103241	Mutant	Ctrl	78767	| hypothetical protein MIMGU_mgv1a007931mg [Erythranthe guttata]	537.695	552.169	459.965	659.912	624.294	459.198	879.904	240.72	811.317	659.912	815.139	362.081	0	0	0	0	0	1				x		x		x
2	373.55	0.574205	0.589093	1.12499	0.0767295	Mutant	Ctrl	126117	| Heat shock protein 90 [Nicotiana tabacum]	884.406	1534.97	705.567	1229.46	916.444	1369.64	1447.27	669.176	1244.53	1229.46	1196.6	1079.97	3	0	0	1	1	1				x	x	x		x
1	241.63	0.30688	0.487227	1.16604	0.149245	Mutant	Ctrl	118639	| unnamed protein product [Coffea canephora]	969.996	1534.52	1117.64	1341.52	1326.09	1555.96	1587.34	668.978	1971.37	1341.52	1731.48	1226.88	2	1	0	2	2	2				x		x		x
3	764.44	0.239583	0.438258	1.31187	0.188367	Mutant	Ctrl	104644	| hypothetical protein MIMGU_mgv1a002163mg [Erythranthe guttata]	1660.97	2409.78	2168.03	2518.73	2115.17	3550.53	2718.07	1050.55	3824.11	2518.73	2761.77	2799.62	4	1	3	1	2	2				x	x	x		x
1	85.12	0.0154715	0.117124	2.32694	0.851531	Mutant	Ctrl	63332	| PREDICTED: GDSL esterase/lipase At1g54790-like [Solanum lycopersicum]	199.408	353.856	183.167	647.054	508.35	558.229	326.318	154.265	323.082	647.054	663.751	440.166	1	1	2	2	3	2	x	x	x	x		x		x
3	164.71	0.775588	0.640118	1.0296	0.0566208	Mutant	Ctrl	165210	| hypothetical protein MIMGU_mgv1a007425mg [Erythranthe guttata]	1102.83	1457.81	1318.97	1312.43	1193.48	1488.54	1804.7	635.538	2326.48	1312.43	1558.33	1173.72	0	0	2	1	0	1				x	x	x		x
2	102.39	0.114017	0.313812	1.25414	0.340284	Mutant	Ctrl	33214	| hypothetical protein MIMGU_mgv1a024055mg [Erythranthe guttata]	681.421	906.801	786.546	978.09	867.942	1132.26	1115.1	395.323	1387.36	978.09	1133.27	892.795	0	0	2	0	0	0				x	x	x		x
3	128.94	0.654222	0.61176	1.05372	0.066669	Mutant	Ctrl	288801	| hypothetical protein MIMGU_mgv1a000389mg [Erythranthe guttata]	1339.45	1658.85	1245.07	1377.76	1378.96	1714.6	2191.92	723.184	2196.14	1377.76	1800.51	1351.97	0	1	1	1	0	1				x	x	x		x
3	286.76	0.248967	0.447913	1.18661	0.18191	Mutant	Ctrl	359385	| PREDICTED: uncharacterized protein LOC102605335 [Solanum tuberosum]	918.33	1422.19	985.896	1263.42	1273.16	1410.58	1502.79	620.01	1738.99	1263.42	1662.36	1112.25	0	0	2	2	2	1				x	x	x		x
4	817.23	0.232596	0.434202	1.3906	0.193438	Mutant	Ctrl	247040	| petA gene product (chloroplast) [Boea hygrometrica]	1645.08	3933.82	1607.37	3594.68	3021.82	3376.75	2692.07	1714.96	2835.18	3594.68	3945.58	2662.59	1	0	5	2	3	1				x	x	x		x
2	195.97	0.0174326	0.117451	1.45189	0.827335	Mutant	Ctrl	90652	| unnamed protein product [Coffea canephora]	941.059	814.784	1053.59	1453.39	1424.68	1200.91	1539.98	355.208	1858.39	1453.39	1860.2	946.923	1	0	0	0	0	1	x			x	x	x		x
2	104.02	0.823903	0.654153	1.03597	0.0540132	Mutant	Ctrl	214564	| nuclear pore complex protein TPRa [Nicotiana benthamiana]	451.012	859.563	465.788	782.689	582.751	474.817	738.053	374.73	821.589	782.689	760.897	374.396	2	0	0	0	1	0				x	x	x		x
2	404.86	0.806374	0.651748	1.02311	0.0548774	Mutant	Ctrl	50456	| ascorbate peroxidase [Rehmannia glutinosa]	832.126	750.718	874.123	799.353	767.04	947.349	1361.72	327.278	1541.84	799.353	1001.52	746.991	2	0	0	0	1	0				x	x	x		x
4	353.73	0.39507	0.536731	1.0549	0.115392	Mutant	Ctrl	44406	| hypothetical protein MIMGU_mgv1a012236mg [Erythranthe guttata]	1401.97	1608.91	1334.37	1475.95	1531.96	1575.89	2294.24	701.409	2353.65	1475.95	2000.28	1242.6	3	2	2	1	4	2				x	x	x		x
4	413.13	0.891578	0.660694	1.00369	0.0514981	Mutant	Ctrl	32822	| hypothetical protein MIMGU_mgv1a015998mg [Erythranthe guttata]	9404.12	15828.8	7885.45	8633.41	11726.6	12880.6	15389.3	6900.63	13908.9	8633.41	15311.4	10156.4	3	1	3	2	4	6				x	x	x		x
1	69.42	0.0861151	0.26837	1.44458	0.409873	Mutant	Ctrl	43422	| _	272.605	423.79	375.114	582.295	546.029	419.558	446.1	184.753	661.652	582.295	712.949	330.824	0	0	2	1	2	0				x		x		x
1	85.27	0.669712	0.61176	1.70116	0.0650707	Mutant	Ctrl	29655	| hypothetical protein MIMGU_mgv1a016210mg [Erythranthe guttata]	48.9033	0	80.4306	0	220.018	0	80.0271	0	141.869	0	287.277	0	0	0	1	0	0	0			x	x		x		x
3	79	0.0463605	0.193631	1.51516	0.577901	Mutant	Ctrl	52601	| hypothetical protein MIMGU_mgv1a010036mg [Erythranthe guttata]	322.198	283.442	358.653	390.161	470.95	599.95	527.257	123.567	632.618	390.161	614.918	473.064	0	0	1	1	2	0	x		x	x	x	x		x
4	191.48	0.157099	0.369135	1.13908	0.268534	Mutant	Ctrl	47433	| NAD(P)-binding Rossmann-fold superfamily protein isoform 1 [Theobroma cacao]	1376.94	1663.07	1333.49	1757.46	1664.05	1560.27	2253.28	725.02	2352.11	1757.46	2172.75	1230.28	2	2	3	2	5	2				x	x	x		x
7	275.08	5.572e-05	0.00503675	7.71562	1	Mutant	Ctrl	43097	| FIL2 [Antirrhinum majus]	1624.55	2089.71	1731.81	12148.4	13630.2	16241.2	2658.48	911.016	3054.69	12148.4	17797	12806.3	4	1	2	9	9	5	x	x	x	x	x	x		x
1	442.52	0.381188	0.528751	1.08857	0.119813	Mutant	Ctrl	52460	| unnamed protein product [Coffea canephora]	215.226	207.349	234.035	240.797	206.987	266.982	352.203	90.3945	412.808	240.797	270.262	210.517	0	0	1	0	0	0				x		x		x
2	106.37	0.00677945	0.0801984	1.20929	0.963278	Mutant	Ctrl	45512	| hypothetical protein MIMGU_mgv1a011215mg [Erythranthe guttata]	924.194	1044.97	962.601	1202.47	1168.12	1174.76	1512.39	455.558	1697.9	1202.47	1525.21	926.304	3	1	2	3	2	1	x			x	x	x		x
9	1856.55	0.379555	0.528707	1.20128	0.120351	Mutant	Ctrl	86063	| _	19178.6	32162.2	14805.3	27999.1	28121.5	23339.2	31384.6	14021.2	26114.6	27999.1	36718.2	18403.1	8	6	6	5	6	5				x	x	x		x
5	490.04	0.0195612	0.124188	1.44506	0.802242	Mutant	Ctrl	106380	| _	5358.92	5968.82	4392.5	7855.98	7912.6	6948.19	8769.53	2602.13	7747.8	7855.98	10331.5	5478.69	5	3	7	6	5	2	x			x	x	x		x
2	72.81	0.545737	0.576584	1.11121	0.0811541	Mutant	Ctrl	35714	| hypothetical protein [Rheum australe]	604.604	524.185	1059.33	749.216	926.55	755.697	989.396	228.52	1868.52	749.216	1209.79	595.871	1	0	2	1	1	0				x	x	x		x
1	82.37	0.0985618	0.287943	1.36619	0.37569	Mutant	Ctrl	23186	| hypothetical protein MIMGU_mgv1a012445mg [Erythranthe guttata]	213.625	243.914	331.628	381.197	306.978	389.975	349.584	106.335	584.948	381.197	400.82	307.498	0	0	0	0	0	1				x		x		x
2	42.67	0.42237	0.545182	1.20751	0.107466	Mutant	Ctrl	10564	| _	1389.74	2044.86	1353.8	2161.89	1377.06	2243.1	2274.22	891.466	2387.93	2161.89	1798.03	1768.7	1	1	2	1	0	0				x	x	x		x
6	156.5	0.363716	0.518718	1.22857	0.125798	Mutant	Ctrl	77268	| glutamine synthetase [Avicennia marina]	1393.86	1144.47	2230.25	1591.06	1913.39	2354.07	2280.96	498.935	3933.87	1591.06	2498.31	1856.2	1	0	1	2	4	2				x	x	x		x
4	123.44	0.203996	0.409487	1.27968	0.216925	Mutant	Ctrl	78849	| hypothetical protein MIMGU_mgv1a003216mg [Erythranthe guttata]	1659.75	2802.3	1719.56	2353.02	2646.4	2911.05	2716.08	1221.67	3033.08	2353.02	3455.4	2295.38	1	0	2	0	1	2				x	x	x		x
3	728.7	0.827269	0.654153	1.06212	0.0538576	Mutant	Ctrl	72826	| _	6325.09	7435.88	7074.86	7589.02	9184.03	5357.17	10350.6	3241.7	12479.1	7589.02	11991.6	4224.16	4	4	5	4	6	3				x	x	x		x
1	178.42	0.790421	0.645901	1.01831	0.0557442	Mutant	Ctrl	23162	| _	2906.36	5662.91	2569.59	3605.74	3302.67	4434.41	4756.08	2468.76	4532.41	3605.74	4312.28	3496.56	0	0	0	0	0	1				x		x		x
3	54.59	0.793644	0.646263	1.01648	0.0555628	Mutant	Ctrl	41327	| hypothetical protein PHAVU_011G033900g [Phaseolus vulgaris]	14257.3	24729.8	12803	17924.4	16148.3	18570.8	23331.1	10781	22582.9	17924.4	21084.8	14643.2	1	0	1	1	2	0				x	x	x		x
1	172.87	0.699188	0.618834	1.07787	0.0623023	Mutant	Ctrl	83965	| pathogenesis-related protein 5-1 [Helianthus annuus]	193.829	115.695	249.971	223.923	225.861	153.28	317.189	50.4376	440.916	223.923	294.906	120.862	1	0	1	1	1	0				x		x		x
3	150.95	0.0594771	0.220851	1.17073	0.508832	Mutant	Ctrl	46306	| hypothetical protein MIMGU_mgv1a012760mg [Erythranthe guttata]	752.77	867.217	725.467	954.057	866.975	924.854	1231.86	378.066	1279.63	954.057	1132.01	729.253	2	1	2	2	2	2				x	x	x		x
1	253.73	0.263405	0.455834	1.81261	0.172692	Mutant	Ctrl	24703	| PREDICTED: protein P21 [Malus domestica]	497.342	597.619	269.822	1082.83	1016.62	374.376	813.869	260.534	475.93	1082.83	1327.4	295.197	0	0	0	2	2	0			x	x		x		x
2	41.52	0.651086	0.61176	1.05834	0.0670053	Mutant	Ctrl	12654	| _	2073.78	2906.12	2611.59	2926.24	2295.61	2812.55	3393.61	1266.93	4606.5	2926.24	2997.37	2217.71	2	1	0	1	2	1				x	x	x		x
1	71.26	0.882774	0.658605	1.08624	0.051754	Mutant	Ctrl	9532	| _	307.744	339.023	420.468	426.217	231.048	502.013	503.603	147.799	741.651	426.217	301.678	395.84	0	0	0	1	0	0				x		x		x
2	47.24	0.774486	0.640008	1.06437	0.0566888	Mutant	Ctrl	12407	| hypothetical protein K437DRAFT_223146 [Tilletiaria anomala UBC 951]	519.327	633.337	780.313	595.06	574.595	887.753	849.847	276.105	1376.37	595.06	750.248	699.999	0	0	1	0	0	2				x	x	x		x
4	283.16	0.0325883	0.163007	1.1843	0.674826	Mutant	Ctrl	93502	| hypothetical protein MIMGU_mgv1a026619mg [Erythranthe guttata]	1385.82	1292.25	1387.46	1505.74	1754.58	1554.49	2267.8	563.359	2447.3	1505.74	2290.95	1225.73	1	1	3	2	3	3	x			x	x	x		x
7	340.41	0.461424	0.552654	1.18101	0.0976458	Mutant	Ctrl	148254	| hypothetical protein CICLE_v10013512mg [Citrus clementina]	2574.58	4132.49	2325.05	3726.52	2693.91	4246.56	4213.13	1801.57	4101.09	3726.52	3517.43	3348.43	3	1	2	4	4	5				x	x	x		x
4	106.31	0.0393906	0.175731	1.26127	0.623101	Mutant	Ctrl	62624	| hypothetical protein MIMGU_mgv1a007287mg [Erythranthe guttata]	611.337	650.883	547.537	767.07	682.567	832.955	1000.42	283.755	965.784	767.07	891.226	656.79	1	0	0	2	4	1	x			x	x	x		x
1	37.59	0.285202	0.475927	1.23498	0.16021	Mutant	Ctrl	7303	| hypothetical protein VITISV_006707 [Vitis vinifera]	339.641	206.622	330.958	381.476	300.167	401.711	555.801	90.0774	583.766	381.476	391.927	316.751	0	0	1	0	0	0				x		x		x
2	48.82	0.455385	0.552654	1.15615	0.09906	Mutant	Ctrl	33499	| _	7587.37	14515.9	7457.96	11889.2	9819.75	12468.3	12416.3	6328.25	13154.9	11889.2	12821.6	9831.34	4	3	3	2	2	2				x	x	x		x
8	817.15	0.0174014	0.117451	1.34394	0.827712	Mutant	Ctrl	117285	| hypothetical protein MIMGU_mgv1a009249mg [Erythranthe guttata]	5286.33	4202.31	4488.82	5857.78	6590.88	6336.25	8650.75	1832.01	7917.69	5857.78	8605.7	4996.17	2	0	3	7	5	4	x			x	x	x		x
4	220.84	0.690599	0.617639	1.05657	0.0630733	Mutant	Ctrl	53174	| hypothetical protein MIMGU_mgv1a007919mg [Erythranthe guttata]	1615.49	2612.55	1078.69	2156.71	1677.43	1772.77	2643.64	1138.95	1902.67	2156.71	2190.22	1397.84	2	3	1	3	4	3				x	x	x		x
1	48.84	0.123985	0.326147	1.27564	0.320672	Mutant	Ctrl	11150	| _	635.859	823.789	531.851	852.521	900.756	787.169	1040.54	359.134	938.117	852.521	1176.11	620.688	0	0	0	0	0	1				x		x		x
1	27.81	0.424668	0.546479	1.30632	0.106841	Mutant	Ctrl	8699	| _	1406.46	1285.39	2708.13	1982.22	1689.93	3381.96	2301.58	560.369	4776.78	1982.22	2206.54	2666.69	0	1	0	0	0	0				x		x		x
1	43.18	0.945033	0.67971	1.29445	0.0503824	Mutant	Ctrl	8915	| _	1256.72	2562.29	2294.55	648.12	3260.19	4005.38	2056.55	1117.04	4047.29	648.12	4256.82	3158.26	0	0	1	0	1	0				x		x		x
1	218.36	0.265431	0.455834	1.61069	0.171463	Mutant	Ctrl	26751	cdna_Contig87|	73.4683	16.534	93.6814	105.086	104.547	86.2252	120.226	7.20807	165.242	105.086	136.506	67.9891	0	0	0	0	0	1			x	x		x		x
1	177.49	0.0364371	0.173537	2.28881	0.644529	Mutant	Ctrl	29779	cdna_Contig265|	44.9808	20.6428	50.3018	76.5674	96.3564	92.4073	73.6082	8.9993	88.7259	76.5674	125.812	72.8637	0	0	0	0	0	1	x	x	x	x		x		x
1	380.3	0.334161	0.507208	1.33336	0.137146	Mutant	Ctrl	35792	cdna_Contig373|	562.983	405.717	1027.92	785.601	714.162	1162.45	921.286	176.874	1813.12	785.601	932.48	916.6	1	0	0	0	0	0				x		x		x
2	374.01	0.832271	0.655642	1.03347	0.0536324	Mutant	Ctrl	51481	cdna_Contig909|	3361.63	5931.99	4355.85	4611.33	3784.2	5710.81	5501.1	2586.07	7683.15	4611.33	4941.02	4503.01	1	2	0	0	0	0				x	x	x		x
2	131.76	0.692956	0.617639	1.05212	0.0628589	Mutant	Ctrl	39481	cdna_Contig1279|	127.242	127.148	67.204	110.354	120.084	107.917	208.223	55.4308	118.539	110.354	156.793	85.093	2	0	0	0	0	0				x	x	x		x
1	132.38	0.450751	0.552654	1.90279	0.10017	Mutant	Ctrl	25799	cdna_Contig1338|	14.0604	12.8923	146.842	0	0	330.695	23.009	5.62045	259.01	0	0	260.755	0	0	0	0	0	1			x	x		x		x
1	194.29	0.085793	0.26837	1.97773	0.410839	Mutant	Ctrl	40350	cdna_Contig1764|	252.001	245.391	528.02	624.549	481.427	922.009	412.384	106.979	931.359	624.549	628.598	727.01	0	0	0	1	0	0			x	x		x		x
1	145.41	0.0421774	0.182015	13.287	0.604181	Mutant	Ctrl	33813	cdna_Contig1796|	1.24639	0	14.3325	66.3404	118.162	22.4948	2.03964	0	25.2807	66.3404	154.284	17.7372	0	0	0	0	1	0	x	x	x	x		x		x
5	179.84	0.178547	0.387206	1.2261	0.242453	Mutant	Ctrl	33489	cdna_Contig1870|	3261.25	4316.23	3328.3	4380.79	3821.89	5168.91	5336.83	1881.68	5870.69	4380.79	4990.22	4075.71	3	3	5	4	3	2				x	x	x		x
1	649.18	0.813817	0.652106	1.03671	0.0544993	Mutant	Ctrl	39731	cdna_Contig1967|	1166.92	1575.14	1148.96	1378.89	1096.94	1558.03	1909.6	686.689	2026.62	1378.89	1432.27	1228.52	0	0	1	0	0	0				x		x		x
3	403.06	0.264033	0.455834	1.20345	0.172309	Mutant	Ctrl	17185	| predicted protein [Populus trichocarpa]	869.88	819.457	1078.02	984.109	1367.38	978.899	1423.5	357.245	1901.5	984.109	1785.39	771.868	2	1	4	2	2	1				x	x	x		x
1	825.55	0.00753362	0.0813127	281.804	0.954312	Mutant	Ctrl	33465	| pectin methylesterase	0	0	9.70467	504.992	2047.78	182.041	0	0	17.1178	504.992	2673.78	143.541	0	0	0	0	1	0	x	x	x	x		x		x
2	57.68	0.301035	0.484788	1.17049	0.152074	Mutant	Ctrl	16726	| monodehydroascorbate reductase	2329.16	3464.99	2304.04	3058.41	2906.8	3513.65	3811.53	1510.58	4064.03	3058.41	3795.4	2770.53	1	1	1	1	0	1				x	x	x		x
3	171.11	0.561581	0.584847	1.07264	0.0786301	Mutant	Ctrl	21817	| nad-dependent epimerase dehydratase	2259.87	3528.64	2321.28	2956.15	2824.36	2918.33	3698.14	1538.32	4094.43	2956.15	3687.76	2301.12	2	1	1	1	1	3				x	x	x		x
4	118.05	0.491417	0.556929	1.06725	0.0911238	Mutant	Ctrl	24952	| conserved hypothetical protein [Ricinus communis]	1649.95	2142.11	1911.68	2162.97	2086.84	1837.49	2700.05	933.862	3371.95	2162.97	2724.78	1448.87	2	2	2	4	3	2				x	x	x		x
2	133.91	0.560137	0.584847	1.05732	0.0788537	Mutant	Ctrl	37447	| 40s ribosomal protein	569.527	607.02	445.813	574.611	602.724	538.018	931.994	264.633	786.356	574.611	786.975	424.23	1	0	0	0	1	0				x	x	x		x
1	59.9	0.800456	0.650867	1.01737	0.0551899	Mutant	Ctrl	26800	| tpic_spiol ame: full=triosephosphate chloroplastic short=tim short=triose-phosphate isomerase flags: precursor	12335.8	23144.7	11786.3	16048.1	14005.7	18033.9	20186.8	10090	20789.6	16048.1	18287.2	14219.9	0	1	0	0	0	0				x		x		x
1	497.91	0.508396	0.558892	1.20184	0.0877709	Mutant	Ctrl	26876	| carbonic anhydrase	756.296	658.681	675.028	982.215	989.19	540.445	1237.63	287.155	1190.66	982.215	1291.58	426.144	1	1	2	1	2	1				x		x		x
1	284.09	0.0696788	0.245565	1.34343	0.46573	Mutant	Ctrl	23843	| pectin methylesterase	420.555	553.84	493.382	615.23	776.061	580.566	688.212	241.448	870.261	615.23	1013.3	457.78	0	0	1	2	2	1				x		x		x
1	144.59	0.982601	0.686538	1.26037	0.0500382	Mutant	Ctrl	33105	| precursor of protein cell division protease ftsh-like protein	132.044	248.486	156.247	119.244	88.2248	469.067	216.081	108.328	275.599	119.244	115.195	369.862	1	0	0	0	0	0				x		x		x
6	168.56	0.1901	0.394706	1.52629	0.230232	Mutant	Ctrl	77176	| transcriptional repressor	636.608	341.825	820.172	848.478	1169.91	726.813	1041.77	149.02	1446.68	848.478	1527.54	573.096	2	0	3	3	4	1			x	x	x	x		x
1	190.79	0.0702926	0.245565	1.59971	0.463371	Mutant	Ctrl	54559	| udp-apiose xylose synthase	1818.87	3115.42	1556.24	3408.02	3489.43	3485.52	2976.46	1358.18	2745	3408.02	4556.14	2748.35	0	1	0	1	0	1			x	x		x		x
1	272.94	0.472323	0.552654	1.14327	0.0951819	Mutant	Ctrl	23031	| precursor of transferase serine hydroxymethyltransferase 2	150.604	87.7249	165.536	140.464	175.015	146.249	246.454	38.244	291.984	140.464	228.517	115.318	0	0	1	1	0	1				x		x		x
2	58.16	0.540696	0.575811	1.15485	0.0819909	Mutant	Ctrl	70586	| protein	1379.94	2456.47	1132.14	1880.33	1472.6	2385.01	2258.18	1070.91	1996.94	1880.33	1922.77	1880.6	2	0	0	0	0	0				x	x	x		x
1	89.76	0.121138	0.323818	1.27289	0.32605	Mutant	Ctrl	38483	| atp-dependent clp	2665.82	3018.07	2323.75	3308.02	4000.34	2884.52	4362.45	1315.74	4098.79	3308.02	5223.23	2274.46	0	1	0	0	0	0				x		x		x
1	529.58	0.00372756	0.0546929	53.0864	0.991987	Mutant	Ctrl	21120	| glyceraldehyde-3-phosphate dehydrogenase b subunit	2.18651	0	4.41382	104.678	77.5523	168.158	3.57808	0	7.78541	104.678	101.26	132.593	0	0	0	0	1	0	x	x	x	x		x		x
1	204.61	0.000717756	0.0191884	2.59912	0.999997	Mutant	Ctrl	11931	| g3pb_tobac ame: full=glyceraldehyde-3-phosphate dehydrogenase chloroplastic ame: full=nadp-dependent glyceraldehydephosphate dehydrogenase subunit b flags: precursor	120.338	163.987	123.069	349.286	370.006	339.573	196.926	71.4906	217.078	349.286	483.116	267.755	0	0	0	1	1	0	x	x	x	x		x		x
1	243.52	0.461874	0.552654	1.2984	0.0975419	Mutant	Ctrl	35270	| porin voltage-dependent anion-selective channel protein	250.418	50.7799	433.513	255.521	452.493	245.936	409.793	22.1377	764.66	255.521	590.819	193.922	0	0	2	1	1	0				x		x		x
2	372.89	0.560988	0.584847	1.07578	0.0787219	Mutant	Ctrl	29975	| elongation factor 1-alpha (ef1-a)	1312.41	1075.87	1413.91	1342.95	1565.68	1181.7	2147.68	469.029	2493.95	1342.95	2044.3	931.778	2	1	4	2	2	1				x	x	x		x
1	128.82	0.473688	0.552654	1.14207	0.0948812	Mutant	Ctrl	33565	| 14-3-3 protein	482.27	265.018	560.483	484.923	508.651	499.991	789.205	115.536	988.618	484.923	664.144	394.246	2	0	0	1	0	0				x		x		x
1	160.1	0.85836	0.656689	1.04202	0.0525736	Mutant	Ctrl	19095	| sodcp_solcs ame: full=superoxide dismutase chloroplastic flags: precursor	1838.31	3306.65	2640.32	2588.05	2023.66	3500.69	3008.29	1441.55	4657.18	2588.05	2642.29	2760.32	0	1	0	0	0	0				x		x		x
1	71.27	0.0478506	0.193631	1.15747	0.569098	Mutant	Ctrl	42048	| tobacco nucleolin	650.908	679.644	626.014	715.543	724.272	824.85	1065.17	296.293	1104.21	715.543	945.68	650.399	0	0	1	0	0	0	x			x		x		x
1	419.74	0.331201	0.503873	2.33523	0.138378	Mutant	Ctrl	8344	| pectin methylesterase	431.778	8.85265	659.013	500.095	1706.05	361.773	706.578	3.85934	1162.41	500.095	2227.59	285.26	0	0	1	0	0	0		x	x	x		x		x
1	45.5	0.00865159	0.0840051	2.08053	0.940328	Mutant	Ctrl	8120	| 40s ribosomal protein	222.316	297.162	192.51	485.594	423.455	572.262	363.806	129.549	339.563	485.594	552.904	451.232	1	0	0	0	0	0	x	x	x	x		x		x
1	145.84	0.0111979	0.0985815	1.71862	0.907015	Mutant	Ctrl	16293	| protein disulfide isomerase	146.576	189.033	133.924	289.884	282.629	234.437	239.862	82.4098	236.225	289.884	369.028	184.855	1	0	1	0	1	1	x		x	x		x		x
1	90.5	0.0206954	0.125362	1.93237	0.789388	Mutant	Ctrl	19793	| predicted protein [Populus trichocarpa]	342.325	502.933	333.182	712.752	625.955	938.474	560.193	219.256	587.69	712.752	817.308	739.992	0	0	1	0	0	0	x		x	x		x		x
1	295.88	0.265966	0.455834	1.18383	0.17114	Mutant	Ctrl	39244	| at4g01050 f2n1_31	457.696	689.215	429.322	625.304	618.554	622.128	748.991	300.466	757.268	625.304	807.644	490.551	1	1	0	1	2	1				x		x		x
1	208.1	0.089451	0.275988	9.20299	0.400126	Mutant	Ctrl	18057	| short chain	27.2082	0.606356	95.5952	167.129	595.88	372.728	44.5244	0.264343	168.617	167.129	778.039	293.898	0	0	1	0	0	0		x	x	x		x		x
1	46.02	0.577966	0.589395	17.391	0.0761813	Mutant	Ctrl	10592	| NA	31.5539	2.00662	19.3096	413.334	506.133	0	51.636	0.874794	34.0596	413.334	660.857	0	0	0	0	0	1	0		x	x	x		x		x
1	410.37	0.419895	0.545182	2.15139	0.108146	Mutant	Ctrl	41540	| fructose-bisphosphate aldolase	72.5322	5.45175	25.8717	102.226	107.122	14.0869	118.694	2.37671	45.6343	102.226	139.868	11.1076	0	0	0	0	1	0		x	x	x		x		x
1	299.66	0.392562	0.534424	1.74294	0.11617	Mutant	Ctrl	37105	| p0 ribosomal	484.618	6.57005	703.582	448.758	1298.8	334.853	793.046	2.86424	1241.03	448.758	1695.84	264.034	0	0	1	0	1	0			x	x		x		x
2	57.71	0.239617	0.438258	1.15044	0.188343	Mutant	Ctrl	17369	| steroid binding	6647.25	7979.34	5773.57	8373.92	8009.17	7086.15	10877.8	3478.62	10183.8	8373.92	10457.6	5587.47	1	0	0	0	0	1				x	x	x		x
2	127.56	0.151285	0.365954	1.11335	0.276507	Mutant	Ctrl	14552	| NA	2891.79	3019.81	2622.45	3315.94	3289.44	2896.01	4732.23	1316.5	4625.66	3315.94	4295.02	2283.52	2	1	2	2	1	2				x	x	x		x
3	115.83	0.342506	0.509336	1.24272	0.133772	Mutant	Ctrl	22056	| heat shock	2719.63	4720.61	2105.49	4003.63	3404.67	4454.38	4450.5	2057.97	3713.81	4003.63	4445.47	3512.3	0	0	1	1	1	0				x	x	x		x
2	233.77	0.0376995	0.173537	1.84475	0.635187	Mutant	Ctrl	8556	| heat shock	391.08	359.153	204.336	624.211	521.406	615.325	639.979	156.574	360.422	624.211	680.798	485.188	1	0	0	1	0	0	x		x	x	x	x		x
1	123.66	0.766797	0.640008	1.03573	0.0571735	Mutant	Ctrl	21674	| at4g01050 f2n1_31	590.954	1023.82	511.056	729.394	618.944	853.458	967.06	446.339	901.437	729.394	808.153	672.956	0	0	0	0	1	0				x		x		x
2	67.89	0.0656844	0.233805	1.26936	0.481694	Mutant	Ctrl	94549	| lysosomal alpha-	387.889	469.964	373.378	468.659	511.442	582.776	634.756	204.882	658.59	468.659	667.788	459.523	0	0	1	2	1	1				x	x	x		x
1	382.25	0.885788	0.659302	1.00222	0.0516641	Mutant	Ctrl	29933	| elongation factor 1-	146.693	232.831	104.268	172.719	123.506	188.64	240.054	101.503	183.914	172.719	161.262	148.744	1	0	0	0	0	0				x		x		x
2	112.36	0.340925	0.509279	1.07932	0.134401	Mutant	Ctrl	13246	| vdac-like porin	1190.5	1433.39	1527.11	1468.71	1527.26	1484.3	1948.18	624.893	2693.62	1468.71	1994.15	1170.38	1	2	3	3	3	1				x	x	x		x
1	52.81	0.0114545	0.0995136	1.59914	0.903624	Mutant	Ctrl	13031	| pathogenesis-related protein 10	107.277	88.8148	109.352	185.702	162.939	139.808	175.552	38.7191	192.882	185.702	212.749	110.239	1	0	1	0	1	0	x		x	x		x		x
2	132.85	0.996243	0.687172	1.36559	0.0500018	Mutant	Ctrl	26168	| nad-malate dehydrogenase	178.95	129.367	150.448	260.007	325.773	40.7049	292.841	56.3981	265.371	260.007	425.361	32.096	0	0	2	0	0	0				x	x	x		x
1	44.36	0.445925	0.552654	3.09828	0.101349	Mutant	Ctrl	12767	| NA	34.4371	266.222	36.4752	0	0.846406	1043.69	56.3542	116.06	64.3375	0	1.10515	822.955	0	0	0	0	0	1		x	x	x		x		x
1	131.93	0.512821	0.562456	2.35767	0.0869341	Mutant	Ctrl	10694	| heat shock protein 93-v	135.033	298.435	595.231	343.838	205.3	1876.2	220.973	130.104	1049.91	343.838	268.059	1479.39	0	0	1	1	0	1		x	x	x		x		x
1	216.66	0.220159	0.425039	1.11878	0.203075	Mutant	Ctrl	11379	| eno_sollc ame: full=enolase ame: full=2-phospho-d-glycerate hydro-lyase ame: full=2-phosphoglycerate dehydratase	537.145	681.686	587.068	628.43	673.126	718.856	879.004	297.183	1035.51	628.43	878.899	566.822	0	0	0	0	1	0				x		x		x
1	62.46	0.991611	0.687039	1.01346	0.0500089	Mutant	Ctrl	17620	| 60s ribosomal protein	715.782	910.904	745.432	984.267	622.587	797.19	1171.33	397.112	1314.85	984.267	812.91	628.589	0	0	0	0	0	1				x		x		x
1	48.02	0.264835	0.455834	2.11138	0.171823	Mutant	Ctrl	7520	| NA	12.1797	7.97933	0.163009	15.5528	18.6059	8.74894	19.9314	3.47862	0.287527	15.5528	24.2936	6.89859	0	0	0	1	0	0		x	x	x		x		x
1	334.74	0.00026198	0.0107828	4.44502	1	Mutant	Ctrl	16181	| unknown [Populus trichocarpa]	376.645	308.939	409.577	1617.33	1875.42	1375.26	616.355	134.683	722.441	1617.33	2448.73	1084.4	1	0	1	0	0	0	x	x	x	x		x		x
1	69.92	0.00981169	0.0899767	1.27826	0.925289	Mutant	Ctrl	17003	| adenine phosphoribosyltransferase	1114.54	1139.37	1194.66	1341.64	1585.41	1481.13	1823.88	496.714	2107.22	1341.64	2070.06	1167.88	0	0	1	0	0	0	x			x		x		x
3	123.06	0.299605	0.484788	1.17328	0.15278	Mutant	Ctrl	42584	| protein dif-	474.122	797.048	592.925	759.963	733.289	693.852	775.871	347.476	1045.84	759.963	957.454	547.107	1	1	2	3	1	0				x	x	x		x
1	139.04	0.662577	0.61176	1.41662	0.0657941	Mutant	Ctrl	99545	| ribosomal protein l16	126.597	131.975	7.86867	191.477	164.227	21.7418	207.168	57.5351	13.8793	191.477	214.43	17.1435	0	0	0	1	0	0				x		x		x
1	45.56	0.0256343	0.143436	4.32401	0.737534	Mutant	Ctrl	16782	| selenium binding protein	135.773	213.099	47.1843	634.906	426.694	650.951	222.184	92.9011	83.227	634.906	557.133	513.278	0	0	0	0	0	1	x	x	x	x		x		x
1	114.93	0.123344	0.326147	2.04234	0.321868	Mutant	Ctrl	27173	| amino acid binding	33.0584	45.7598	28.176	85.6833	36.7105	96.1246	54.0981	19.9491	49.6989	85.6833	47.9328	75.7948	0	0	0	0	0	1		x	x	x		x		x
1	211.88	0.627722	0.604061	1.28924	0.0696503	Mutant	Ctrl	10261	| mitochondrial malate dehydrogenase	359.838	228.921	412.382	209.795	477.7	603.218	588.852	99.7989	727.388	209.795	623.732	475.641	1	0	1	0	0	0				x		x		x
2	478.86	0.0502246	0.193631	1.47692	0.555629	Mutant	Ctrl	29697	| 2-cys peroxiredoxin	1141.1	1037.03	1131.02	1357.12	1456.72	2073.5	1867.34	452.095	1994.97	1357.12	1902.03	1634.97	2	0	2	0	1	0				x	x	x		x
1	52.64	0.497153	0.557014	1.13285	0.0899652	Mutant	Ctrl	14208	| ribosomal protein l28	100.527	57.3018	104.264	93.3601	89.9687	113.582	164.506	24.9809	183.908	93.3601	117.472	89.5604	1	0	1	1	0	0				x		x		x
2	190.71	0.620993	0.603319	1.12864	0.0704596	Mutant	Ctrl	10287	| kunitz-type protease inhibitor kpi-	16162.3	81645.8	12626.8	29798.6	23167.2	71675.8	26448.5	35593.8	22272	29798.6	30249.4	56516.8	3	1	5	4	5	4				x	x	x		x
1	57.11	0.0775649	0.257354	6.30283	0.437148	Mutant	Ctrl	28447	| rna-binding protein	25.4928	3.0385	46.4517	227.9	59.153	185.551	41.7173	1.32465	81.9347	227.9	77.2359	146.308	0	0	0	0	1	0		x	x	x		x		x
3	108.24	0.853967	0.656689	1.01682	0.0527385	Mutant	Ctrl	18761	| translationally controlled tumor protein	3312.33	5401.49	3310.83	3738.31	3662.89	4825.67	5420.41	2354.8	5839.88	3738.31	4782.63	3805.07	4	3	6	4	2	3				x	x	x		x
1	117.17	0.00941688	0.0899767	3.1457	0.930447	Mutant	Ctrl	36123	| gcs1 (glucosidase 1) alpha-glucosidase	483.031	966.605	482.388	1786.69	1818.65	2472.23	790.449	421.395	850.869	1786.69	2374.61	1949.37	0	0	0	0	1	0	x	x	x	x		x		x
3	145.53	0.0373588	0.173537	1.49699	0.637681	Mutant	Ctrl	17415	| class iv chitinase	643.09	797.617	605.72	1134.48	1101.14	827.863	1052.38	347.724	1068.41	1134.48	1437.75	652.775	4	1	2	4	4	3	x			x	x	x		x
2	150.03	0.048232	0.193631	2.40303	0.566889	Mutant	Ctrl	14204	| endo- - -beta-d-	446.004	209.933	378.936	549.435	786.472	1150.93	729.857	91.5212	668.393	549.435	1026.89	907.513	0	0	1	1	0	0	x	x	x	x	x	x		x
1	59.57	0.653169	0.61176	1.14584	0.0667815	Mutant	Ctrl	11534	| monodehydroascorbate reductase	294.881	1.22307	447.405	228.337	596.153	27.4488	482.554	0.533203	789.165	228.337	778.396	21.6435	0	0	1	0	0	0				x		x		x
2	124.94	0.105397	0.297392	3.09621	0.359192	Mutant	Ctrl	13656	| elicitor-inducible protein eig-j7	176.151	37.1327	206.469	315.427	696.18	288.036	288.26	16.1881	364.184	315.427	909.001	227.118	2	0	0	0	0	0		x	x	x	x	x		x
1	67.76	0.178733	0.387206	1.26139	0.242247	Mutant	Ctrl	11949	| at5g66780 mud21_2	98.6848	124.706	96.9759	118.242	119.373	166.492	161.492	54.366	171.053	118.242	155.866	131.28	0	0	1	0	0	0				x		x		x
2	82.92	0.569934	0.587981	1.07169	0.0773619	Mutant	Ctrl	37434	| atp-dependent protease	1310.84	1870.67	1390.72	1526.12	1534.54	1839.34	2145.11	815.524	2453.05	1526.12	2003.65	1450.33	0	0	2	0	0	0				x	x	x		x
1	130	0.539854	0.575811	1.08279	0.0821322	Mutant	Ctrl	10908	| elicitor-inducible protein eig-j7	100.876	0	164.378	60.2039	192.956	34.0551	165.077	0	289.942	60.2039	251.943	26.8527	0	0	0	0	1	0				x		x		x
1	70.01	0.612923	0.599544	2.18402	0.0714594	Mutant	Ctrl	46876	| heat shock	38.9658	31.8263	69.2901	31.1198	36.2764	238.546	63.765	13.8748	122.219	31.1198	47.366	188.095	0	0	0	0	0	1		x	x	x		x		x
3	112.05	0.871633	0.656689	1.0278	0.0521078	Mutant	Ctrl	37559	| 26s proteasome non-atpase regulatory	427.294	558.585	342.877	525.451	489.666	350.582	699.24	243.517	604.791	525.451	639.356	276.436	1	1	2	1	1	1				x	x	x		x
1	123.34	0.310977	0.488963	1.9039	0.147316	Mutant	Ctrl	20704	| vacuolar h+-atpase catalytic subunit	35.325	1.00169	20.7754	37.0518	51.5805	20.0844	57.8071	0.436691	36.645	37.0518	67.3485	15.8367	0	0	0	0	1	0			x	x		x		x
2	66.81	0.02414	0.137404	1.93753	0.752533	Mutant	Ctrl	11052	| endo- - -beta-d-	163.88	171.31	128.784	394.69	274.195	230.075	268.18	74.683	227.157	394.69	358.015	181.416	0	0	0	0	2	0	x		x	x	x	x		x
1	139.52	0.172038	0.381562	1.1338	0.249864	Mutant	Ctrl	20002	| thioredoxin-dependent peroxidase	176.125	155.316	181.119	172.092	201.52	207.529	288.218	67.7104	319.469	172.092	263.124	163.638	1	0	0	0	0	1				x		x		x
3	121.42	0.000277627	0.0107828	1.72699	1	Mutant	Ctrl	16487	| protein	517.037	519.438	475.728	900.893	900.785	809.883	846.098	226.451	839.121	900.893	1176.15	638.597	1	1	1	1	2	0	x		x	x	x	x		x
2	102.44	0.0755375	0.254464	1.34497	0.444154	Mutant	Ctrl	30814	| mitochondrial elongation factor tu	227.398	251.361	306.909	301.276	347.314	408.113	372.123	109.582	541.348	301.276	453.487	321.799	0	0	0	0	1	1				x	x	x		x
1	82.78	0.771118	0.640008	1.02682	0.0568987	Mutant	Ctrl	24305	| voltage-dependent anion-selective	311.888	452.317	275.013	342.1	383.318	341.671	510.384	197.189	485.088	342.1	500.497	269.409	0	0	1	1	0	0				x		x		x
2	37.42	0.682321	0.616716	1.05031	0.0638439	Mutant	Ctrl	9995	| hydroxyacyl-acp dehydrase	1677.99	2763.33	1491.84	1976.47	2020	2235.17	2745.92	1204.68	2631.42	1976.47	2637.51	1762.45	1	2	2	2	2	1				x	x	x		x
2	81.89	0.00072654	0.0191884	5.33128	0.999997	Mutant	Ctrl	13038	| heat shock protein	420.715	293.75	383.399	1904.88	1499.23	2448.91	688.473	128.061	676.265	1904.88	1957.54	1930.98	1	0	1	1	3	2	x	x	x	x	x	x		x
1	83.53	0.348081	0.511498	1.28099	0.131595	Mutant	Ctrl	12391	| hypothetical protein [Plantago major]	131.135	108.727	187.27	131.823	179.733	235.595	214.594	47.4001	330.32	131.823	234.677	185.768	2	0	0	0	1	0				x		x		x
1	63.85	0.924394	0.671724	1.29419	0.050725	Mutant	Ctrl	10706	| NA	50.841	98.5873	72.4113	36.2325	39.4258	211.445	83.198	42.9795	127.724	36.2325	51.4782	166.726	0	0	0	0	1	0				x		x		x
2	210.21	0.126229	0.327597	1.23077	0.316551	Mutant	Ctrl	16819	| 14-3-3 protein	380.626	459.919	360.505	514.387	420.276	543.549	622.871	200.503	635.884	514.387	548.754	428.591	0	0	0	2	2	2				x	x	x		x
1	55.44	0.914481	0.669673	1.07366	0.0509287	Mutant	Ctrl	11229	| thylakoid ascorbate peroxidase precursor	3306.49	8525.19	1806.76	4324.9	1709.96	8608.18	5410.86	3716.59	3186.9	4324.9	2232.69	6787.6	4	1	2	2	2	0				x		x		x
1	101.7	0.0818827	0.265021	1.53978	0.422938	Mutant	Ctrl	21872	| iaa-amino acid hydrolase ilr1	70.7266	136.427	85.3571	142.949	140.93	166.525	115.74	59.476	150.559	142.949	184.012	131.306	0	0	1	0	0	0			x	x		x		x
3	59.87	0.166306	0.378584	1.3576	0.256739	Mutant	Ctrl	28545	| peroxisomal membrane 22 kda family protein	2227.13	3849.9	1960.82	3697.91	3547.64	3666.66	3644.56	1678.38	3458.64	3697.91	4632.14	2891.19	2	1	0	1	0	0				x	x	x		x
2	77.82	0.0134614	0.10973	1.28803	0.877272	Mutant	Ctrl	22722	| protein disulfide	223.995	250.113	214.663	307.613	306.536	273.01	366.554	109.038	378.637	307.613	400.243	215.27	0	0	1	1	1	0	x			x	x	x		x
1	41.72	0.00316498	0.0485984	2.41907	0.995208	Mutant	Ctrl	7941	| NA	334.109	239.044	369.519	831.992	695.528	752.865	546.748	104.212	651.784	831.992	908.149	593.639	0	0	1	0	0	0	x	x	x	x		x		x
1	110.35	0.979898	0.686538	1.05139	0.050051	Mutant	Ctrl	19366	| dead-box rna helicase-like protein	34.6129	7.46642	409.042	9.6728	21.6427	442.988	56.6418	3.25501	721.496	9.6728	28.2588	349.298	0	0	1	0	0	0				x		x		x
1	137.72	0.0428943	0.183907	5.75673	0.599504	Mutant	Ctrl	43272	| tubulin alpha-7 chain	65.2081	14.6546	70.2161	315.83	422.844	125.288	106.709	6.38873	123.852	315.83	552.107	98.7906	0	0	0	1	0	0	x	x	x	x		x		x
2	86.56	0.326801	0.503873	1.21275	0.140243	Mutant	Ctrl	22703	| internal-motor kinesin	337.028	456.75	300.012	495.154	341.939	489.398	551.526	199.122	529.182	495.154	446.469	385.893	0	0	0	1	0	1				x	x	x		x
1	46.82	3.90332e-05	0.00503675	4.85785	1	Mutant	Ctrl	44278	| chromatin remodeling complex subunit	135.999	131.061	114.509	664.215	545.996	643.394	222.553	57.1365	201.979	664.215	712.906	507.32	0	0	0	1	0	0	x	x	x	x		x		x
1	29.27	0.589062	0.59199	1.1229	0.074611	Mutant	Ctrl	9493	| rna polymerase iv second largest subunit	59.9778	93.1424	22.3348	54.1319	61.0718	81.8149	98.1499	40.6058	39.3957	54.1319	79.7413	64.5115	1	0	0	0	0	0				x		x		x
1	29.63	0.00197723	0.0343552	2.95682	0.999181	Mutant	Ctrl	7271	| NA	1118.53	1637.2	1074.48	3533.18	3453.8	4338.23	1830.4	713.743	1895.24	3533.18	4509.61	3420.72	0	1	0	0	0	0	x	x	x	x		x		x
2	35.31	0.441516	0.552654	1.10668	0.102447	Mutant	Ctrl	11620	| NA	376.897	550.447	353.396	452.356	497.788	467.228	616.768	239.969	623.344	452.356	649.96	368.412	1	1	1	1	2	1				x	x	x		x
1	64.29	0.666659	0.61176	1.08937	0.0653776	Mutant	Ctrl	8702	| NA	286.512	109.481	415.206	263.927	390.399	229.372	468.859	47.7284	732.369	263.927	509.742	180.861	0	0	1	0	1	0				x		x		x
1	45.74	0.0119994	0.102893	1.5706	0.896432	Mutant	Ctrl	11282	| NA	425.029	498.753	346.813	671.382	648.968	675.251	695.533	217.433	611.733	671.382	847.356	532.439	0	0	0	1	0	0	x		x	x		x		x
1	62.29	0.507375	0.558892	1.09634	0.0879661	Mutant	Ctrl	11155	| adenosine nucleotide translocator	2072.34	2335.89	1485.52	2214.37	1926.14	2321.06	3391.25	1018.34	2620.27	2214.37	2514.96	1830.17	0	0	2	0	0	0				x		x		x
1	86.34	0.16601	0.378584	1.28589	0.257105	Mutant	Ctrl	8140	| catalase	154.903	103.845	154.214	182.641	197.513	150.869	253.489	45.2714	272.014	182.641	257.892	118.961	1	0	2	1	1	0				x		x		x
1	57.05	0.564402	0.585936	1.41919	0.0781972	Mutant	Ctrl	9718	| NA	42.8119	18.4362	55.1166	81.7348	60.5612	22.8475	70.0591	8.03733	97.2185	81.7348	79.0745	18.0154	0	0	0	0	1	0				x		x		x
2	233.86	0.0583343	0.218842	1.23295	0.514172	Mutant	Ctrl	41083	contig00009|	273.937	210.109	255.415	305.21	313.765	292.744	448.281	91.5977	450.519	305.21	409.682	230.83	0	0	1	0	1	0				x	x	x		x
2	182.95	0.00809818	0.0813127	1.50042	0.947334	Mutant	Ctrl	74727	contig00295|	2180.94	2532.82	2001.33	3244.8	3152.97	3677.66	3568.98	1104.19	3530.08	3244.8	4116.82	2899.86	0	0	0	0	0	2	x		x	x	x	x		x
2	157.88	0.758995	0.640008	1.03545	0.0576849	Mutant	Ctrl	118888	contig00299|	982.006	1266.58	746.51	1164.29	961.055	975.931	1606.99	552.169	1316.75	1164.29	1254.85	769.527	0	0	0	0	2	0				x	x	x		x
1	60.65	0.164028	0.376049	1.5298	0.259568	Mutant	Ctrl	33957	contig00316|	1895.56	1353.48	1222.09	2338.82	2984.79	1516.35	3101.97	590.056	2155.62	2338.82	3897.24	1195.65	0	0	1	0	0	0			x	x		x		x
1	92.2	0.178092	0.387206	1.19327	0.242958	Mutant	Ctrl	38467	contig00554|	912.4	1203.42	840.257	1160.5	1258.8	1108.11	1493.09	524.635	1482.1	1160.5	1643.61	873.753	0	0	1	0	0	0				x		x		x
3	129.55	0.621351	0.603319	1.04158	0.0704159	Mutant	Ctrl	71047	contig00695|	1383.18	1246.56	1594.23	1461.43	1574.74	1363.44	2263.48	543.444	2812.02	1461.43	2056.13	1075.08	0	0	0	0	1	2				x	x	x		x
1	82.33	0.977888	0.686538	1.63924	0.0500618	Mutant	Ctrl	52361	contig00801|	1.35165	155.934	37.9786	100.941	0	219.145	2.2119	67.98	66.9892	100.941	0	172.797	0	0	0	0	0	1			x	x		x		x
1	85.38	0.243554	0.441788	1.11139	0.185587	Mutant	Ctrl	44031	contig00906|	333.761	382.105	300.831	406.866	360.713	362.367	546.179	166.58	530.627	406.866	470.983	285.728	1	0	1	0	1	0				x		x		x
1	751.26	0.490973	0.556929	1.0542	0.0912145	Mutant	Ctrl	74561	contig01106|	347.998	419.009	355.772	380.423	375.177	428.037	569.477	182.669	627.535	380.423	489.868	337.51	0	0	0	0	1	0				x		x		x
1	82.65	0.438882	0.552037	1.09533	0.103114	Mutant	Ctrl	39921	contig01122|	234.159	317.122	297.351	285.687	294.984	348.865	383.187	138.25	524.489	285.687	385.16	275.082	0	0	0	1	0	0				x		x		x
4	588.8	0.75541	0.640008	1.03406	0.0579266	Mutant	Ctrl	97809	contig01317|	1543.45	2147.82	1412.06	1719.35	1601.94	1955.84	2525.76	936.348	2490.7	1719.35	2091.65	1542.19	2	2	1	1	3	0				x	x	x		x
1	231.39	0.498338	0.557014	1.34549	0.0897291	Mutant	Ctrl	39097	contig01626|	58.5828	1.83353	225.674	43.9421	277.856	63.1335	95.867	0.799335	398.06	43.9421	362.796	49.7812	0	0	1	0	0	0				x		x		x
1	349.99	0.384096	0.530555	1.17676	0.118863	Mutant	Ctrl	43252	contig01820|	193.62	120.12	227.848	199.085	235.631	202.607	316.847	52.3669	401.895	199.085	307.663	159.757	0	0	0	1	0	0				x		x		x
1	143.23	0.443254	0.552654	1.5715	0.102012	Mutant	Ctrl	41857	contig01883|	257.645	142.888	247.884	261.103	588.306	169.579	421.62	62.2927	437.234	261.103	768.149	133.714	0	0	0	0	1	0			x	x		x		x
1	200.64	0.329942	0.503873	1.53328	0.138908	Mutant	Ctrl	36533	contig01997|	133.954	141.204	16.5207	157.697	154.255	135.272	219.207	61.5582	29.1404	157.697	201.41	106.663	1	0	0	0	0	0			x	x		x		x
2	341.34	0.325373	0.503122	1.08597	0.140858	Mutant	Ctrl	47866	contig02326|	326.212	264.065	320.069	319.354	353.475	315.776	533.826	115.12	564.559	319.354	461.531	248.991	0	0	0	0	1	1				x	x	x		x
1	108.93	0.174947	0.386327	2.1243	0.246502	Mutant	Ctrl	57657	contig02735|	54.7553	10.3935	82.7572	85.9852	118.221	109.991	89.6037	4.53107	145.973	85.9852	154.361	86.7284	0	0	0	0	1	0		x	x	x		x		x
2	70.27	0.834118	0.655642	1.01277	0.0535511	Mutant	Ctrl	42918	contig02761|	217.126	269.917	278.67	247.27	264.617	263.605	355.313	117.671	491.538	247.27	345.509	207.854	0	0	1	1	2	1				x	x	x		x
2	129.08	0.206133	0.410703	1.29762	0.215	Mutant	Ctrl	91522	contig02782|	739.918	1081.36	553.161	1040.11	960.684	1080.31	1210.83	471.421	975.703	1040.11	1254.36	851.827	0	0	0	1	0	1				x	x	x		x
1	895.07	0.178864	0.387206	1.40268	0.242102	Mutant	Ctrl	80806	contig03323|	635.242	1108.55	622.931	1005.39	939.984	1374.37	1039.53	483.277	1098.77	1005.39	1227.33	1083.7	1	0	1	0	0	0				x		x		x
2	98.07	0.355893	0.511974	1.88906	0.128644	Mutant	Ctrl	18568	contig03331|	2234.32	1080.02	861.216	3281.26	3697.88	908.717	3656.32	470.839	1519.07	3281.26	4828.31	716.529	0	0	1	0	2	0			x	x	x	x		x
2	109.96	0.321671	0.498565	1.36316	0.142472	Mutant	Ctrl	28024	contig03423|	1770.02	2324.52	1062.53	2912.17	2514.82	1602.93	2896.53	1013.38	1874.16	2912.17	3283.6	1263.92	0	0	0	2	2	2				x	x	x		x
1	159.45	0.878216	0.656689	1.26516	0.0518947	Mutant	Ctrl	24132	contig03711|	7.04799	10.3627	6.14252	14.8186	13.5811	1.39878	11.5336	4.51765	10.8346	14.8186	17.7329	1.10294	0	0	0	0	1	0				x		x		x
1	306.24	0.227207	0.429358	1.10308	0.197513	Mutant	Ctrl	59177	contig03883|	114.037	92.2698	92.3031	106.441	111.073	111.878	186.615	40.2254	162.811	106.441	145.028	88.2165	1	0	0	0	0	0				x		x		x
3	43.64	0.807319	0.651748	1.14385	0.0548285	Mutant	Ctrl	32828	contig04677|	2347.44	3828.12	3871.32	3060.64	2426.71	6004.81	3841.44	1668.88	6828.5	3060.64	3168.55	4734.83	0	0	1	0	1	1				x	x	x		x
1	389.51	0.181715	0.391402	1.17885	0.238987	Mutant	Ctrl	42851	contig04720|	325.543	265.323	344.364	378.407	401.855	322.231	532.731	115.669	607.413	378.407	524.701	254.081	0	0	0	1	0	0				x		x		x
1	357.18	0.415167	0.543537	1.11376	0.109465	Mutant	Ctrl	68157	contig05229|	61.297	82.7614	60.3043	84.3614	66.1088	77.1403	100.309	36.0801	106.369	84.3614	86.318	60.8256	0	0	1	0	0	0				x		x		x
2	151.87	0.458096	0.552654	1.09481	0.0984209	Mutant	Ctrl	38891	contig05598|	1457.72	1995.14	1321.05	1857.02	1687.34	1682.17	2385.47	869.787	2330.16	1857.02	2203.16	1326.4	2	3	3	2	4	2				x	x	x		x
1	172.54	0.518179	0.56739	1.11313	0.0859407	Mutant	Ctrl	48454	contig05758|	150.842	133.646	194.181	179.535	144.622	208.663	246.843	58.2633	342.51	179.535	188.832	164.532	1	0	0	0	0	0				x		x		x
1	352.8	0.437662	0.552037	1.35143	0.103425	Mutant	Ctrl	40699	contig06325|	26.3901	38.2775	3.61306	29.4031	41.6864	21.1869	43.1858	16.6872	6.37296	29.4031	54.4299	16.706	0	0	0	1	0	0				x		x		x
2	55.57	0.597165	0.597331	1.08717	0.0735071	Mutant	Ctrl	57242	contig07583|	945.397	1847.78	654.026	1343.01	1151.11	1253.56	1547.08	805.546	1153.62	1343.01	1503	988.439	1	0	1	2	0	0				x	x	x		x
1	859.35	0.28893	0.479323	1.19803	0.158229	Mutant	Ctrl	137225	contig07714|	205.687	159.995	232.948	255.029	268.269	193.881	336.595	69.7506	410.89	255.029	350.279	152.876	0	0	0	1	0	0				x		x		x
1	71.92	0.982432	0.686538	2.19562	0.050039	Mutant	Ctrl	14873	contig07874|	87.1829	96.3896	468.05	53.1002	51.2964	1326.32	142.669	42.0214	825.579	53.1002	66.9776	1045.81	0	0	0	0	0	1		x	x	x		x		x
1	295.36	0.0258862	0.143628	1.35342	0.735062	Mutant	Ctrl	40728	contig08705|	245.237	212.885	259.404	359.055	287.208	324.85	401.314	92.8078	457.554	359.055	375.007	256.146	0	0	0	0	0	1	x			x		x		x
3	66.16	0.253389	0.45364	1.12516	0.178998	Mutant	Ctrl	45086	contig10383|	6055	7247.22	5236	6928.57	6802.82	7127.08	9908.62	3159.45	9235.61	6928.57	8882.42	5619.74	2	1	0	1	1	0				x	x	x		x
1	668.39	0.586988	0.590805	1.22742	0.0748993	Mutant	Ctrl	69510	contig10591|	1269.98	1679.33	2290.09	1680.58	1507	3243.39	2078.25	732.109	4039.42	1680.58	1967.68	2557.43	1	0	0	0	0	0				x		x		x
2	203.35	0.0412162	0.180223	1.38621	0.610572	Mutant	Ctrl	44376	contig11272|	414.695	443.164	466.673	741.25	553.171	541.659	678.622	193.199	823.15	741.25	722.274	427.102	1	0	0	1	1	1	x			x	x	x		x
1	929.64	0.000123039	0.00791701	15.48	1	Mutant	Ctrl	60834	contig12152|	162.979	89.3007	140.679	2129.83	2120.96	1832.23	266.705	38.931	248.139	2129.83	2769.33	1444.72	1	0	0	0	0	0	x	x	x	x		x		x
3	656.25	0.718644	0.625984	1.03246	0.0606596	Mutant	Ctrl	85664	contig13162|	1174.58	1532.94	1059.07	1270.34	1256.64	1361.85	1922.13	668.289	1868.05	1270.34	1640.8	1073.82	2	2	2	2	2	0				x	x	x		x
2	114.03	0.0138362	0.11141	1.79714	0.87241	Mutant	Ctrl	35779	contig14572|	424.327	568.409	348.627	846.946	772.241	791.428	694.384	247.8	614.933	846.946	1008.31	624.046	2	1	2	2	3	3	x		x	x	x	x		x
1	124.18	0.86216	0.656689	1.00852	0.0524353	Mutant	Ctrl	28417	contig15266|	848.644	553.204	767.537	703.499	732.612	751.753	1388.75	241.171	1353.84	703.499	956.569	592.761	0	0	1	1	0	0				x		x		x
2	729.41	0.0297982	0.152267	2.58625	0.698662	Mutant	Ctrl	33684	contig15331|	2407	1702.92	3169.4	4029.91	8571.38	6224.86	3938.91	742.394	5590.4	4029.91	11191.6	4908.34	1	0	2	1	2	0	x	x	x	x	x	x		x
2	299	0.0480051	0.193631	1.5815	0.568201	Mutant	Ctrl	100116	contig15465|	1107.05	1182.81	727.795	1772.42	1619.24	1380.74	1811.62	515.649	1283.74	1772.42	2114.24	1088.72	1	0	0	0	1	1	x		x	x	x	x		x
1	131.68	0.203252	0.409487	1.91279	0.217602	Mutant	Ctrl	36906	contig15483|	59.7117	12.7929	71.0012	79.7406	120.566	74.19	97.7145	5.57709	125.237	79.7406	157.423	58.4993	0	0	1	0	0	0			x	x		x		x

## Sheet: Table S4
												Normalized abundance						Raw abundance						Spectral counts
												Ctrl			Mutant			Ctrl			Mutant			Ctrl			Mutant			Tags
Accession	Peptide count	Unique peptides	Confidence score	Anova (p)	q Value	Max fold change	Power	Highest mean condition	Lowest mean condition	Mass	Description	Petko_Hab.Ctrl1	Petko_Hab.Ctrl2	Petko_Hab.Ctrl3	Petko_Hab.Dz1	Petko_Hab.Dz2	Petko_Hab.Dz3	Petko_Hab.Ctrl1	Petko_Hab.Ctrl2	Petko_Hab.Ctrl3	Petko_Hab.Dz1	Petko_Hab.Dz2	Petko_Hab.Dz3	Petko_Hab.Ctrl1	Petko_Hab.Ctrl2	Petko_Hab.Ctrl3	Petko_Hab.Dz1	Petko_Hab.Dz2	Petko_Hab.Dz3	Anova p-value <= 0.05	Max fold change >= 1.5	Max fold change >= 2	At least 1 unique peptide	At least 2 peptides	High abundance in mutant	High abundance in Ctrl
A0A0K0QNR3_9LAMI	5	2	164.67	0.91369	0.802006	1.02649	0.0509461	Ctrl	Mutant	36462	Translation elongation factor 1-alpha (Fragment) OS=Tengia sp. MEN-2015 OX=1661739 PE=4 SV=1	621.625	921.521	676.65	686.171	815.621	660.724	1017.25	401.74	1193.52	686.171	1064.95	520.984	1	1	1	1	1	1				x	x		x
A0A1C9HCF2_9LAMI	24	1	1676.61	0.767546	0.78744	1.04575	0.0571254	Ctrl	Mutant	25684	ATP synthase beta subunit (Fragment) OS=Oreocharis longifolia OX=1032968 GN=atpB PE=4 SV=1	1427.2	1987.87	1486.23	1631.77	1466.18	1588.92	2335.52	866.62	2621.52	1631.77	1914.39	1252.87	0	0	0	1	0	0				x	x		x
A0A1C9HCP5_9LAMI	11	1	872.93	0.67043	0.78744	1.33298	0.064999	Ctrl	Mutant	26875	ATP synthase subunit beta (Fragment) OS=Petrocodon jingxiensis OX=1898808 GN=atpB PE=4 SV=1	2654.51	8419.21	2938.73	2197.86	3108.41	5205.84	4343.93	3670.38	5183.54	2197.86	4058.65	4104.84	0	0	1	0	0	0				x	x		x
A0A1D9CSC9_9LAMI;A0A1W5T3D7_9LAMI;A0A291F729_9LAMI;A0A2L1DET6_9LAMI;A0A2Z7CT78_9LAMI;Q8HTW0_9LAMI	19	12	1076.89	0.724767	0.78744	1.06943	0.0601714	Ctrl	Mutant	54321	Photosystem II CP47 reaction center protein OS=Haberlea rhodopensis OX=121482 GN=psbB PE=3 SV=1	25212.6	36158.6	23975.5	24244.3	27794.1	27767.5	41258.9	15763.5	42289.6	24244.3	36290.7	21894.9	15	9	19	14	16	14				x	x		x
A0A1D9CSE1_9LAMI	6	4	440.96	0.754562	0.78744	1.12121	0.0579844	Ctrl	Mutant	38952	Photosystem II protein D1 OS=Haberlea rhodopensis OX=121482 GN=psbA PE=3 SV=1	7923.63	13553.6	6847.91	8765.93	8216	8281.03	12966.5	5908.72	12078.8	8765.93	10727.6	6529.64	5	5	5	6	4	5				x	x		x
A0A1D9CSE6_9LAMI;A0A2H4NSB3_9LAMI	6	4	111.1	0.383419	0.693372	1.22665	0.119083	Ctrl	Mutant	17350	30S ribosomal protein S7, chloroplastic OS=Haberlea rhodopensis OX=121482 GN=rps7 PE=3 SV=1	23178.8	32623.8	20232.7	21854.3	25229.3	14902.3	37930.6	14222.4	35687.9	21854.3	32941.8	11750.5	1	1	3	2	2	2				x	x		x
A0A1D9CSF0_9LAMI	4	4	96.79	0.773994	0.78744	1.07161	0.0567192	Ctrl	Mutant	19082	Cytochrome b6-f complex subunit 4 OS=Haberlea rhodopensis OX=121482 GN=petD PE=3 SV=1	3146.26	4581.97	2780.88	3089.56	2978	3739.31	5148.66	1997.53	4905.11	3089.56	3888.36	2948.47	5	1	2	3	2	0				x	x		x
A0A1D9CSF7_9LAMI	4	3	241.28	0.0420695	0.42658	1.22796	0.604892	Ctrl	Mutant	24814	Cytochrome b6 OS=Haberlea rhodopensis OX=121482 GN=petB PE=3 SV=1	1331.93	1499.49	1376.31	1107.09	1040.71	1278.8	2179.63	653.707	2427.63	1107.09	1358.86	1008.34	4	1	3	2	2	2	x			x	x		x
A0A1D9CSG0_9LAMI	3	3	22.13	0.00974619	0.21269	1.31639	0.926147	Ctrl	Mutant	13710	50S ribosomal protein L14, chloroplastic OS=Haberlea rhodopensis OX=121482 GN=rpl14 PE=3 SV=1	907.332	974.909	1040.97	688.981	801.669	729.978	1484.79	425.015	1836.13	688.981	1046.74	575.592	1	1	2	1	2	0	x			x	x		x
A0A1D9CSG3_9LAMI;I3NV92_9LAMI;A0A1W5T1P8_9LAMI;G9FCF3_9LAMI;A0A291F6W5_9LAMI;I3NV93_9LAMI	10	4	372.72	0.705072	0.78744	1.09249	0.0617906	Ctrl	Mutant	14924	ATP synthase epsilon chain, chloroplastic OS=Haberlea rhodopensis OX=121482 GN=atpE PE=3 SV=1	3855.01	5858.43	3556.65	4306.51	3679.96	4160.17	6308.47	2554	6273.47	4306.51	4804.91	3280.32	5	4	4	3	4	4				x	x		x
A0A1D9CSG9_9LAMI;A0A1W5T3I2_9LAMI	9	6	408.25	0.791497	0.78744	1.08714	0.0556833	Ctrl	Mutant	9446	Photosystem I iron-sulfur center OS=Haberlea rhodopensis OX=121482 GN=psaC PE=3 SV=1	11504.1	19311.5	11146.5	13226.1	12284.9	13087.4	18825.7	8418.94	19660.9	13226.1	16040.4	10319.5	8	8	8	8	6	4				x	x		x
A0A1D9CSH0_9LAMI	4	2	114.18	0.00783471	0.202154	3.08402	0.950614	Ctrl	Mutant	9377	Cytochrome b559 subunit alpha OS=Haberlea rhodopensis OX=121482 GN=psbE PE=3 SV=1	3190.75	3796.87	1883.77	1077.59	937.144	861.839	5221.45	1655.26	3322.73	1077.59	1223.63	679.565	4	4	4	3	2	2	x	x	x	x	x		x
A0A2H5BTX1_9LAMI	3	1	104.93	0.292716	0.654563	1.36973	0.156259	Ctrl	Mutant	5946	Glyceraldehyde 3-phosphate dehydrogenase (Fragment) OS=Gesneria fruticosa OX=795422 GN=GAPDH PE=4 SV=1	9794.59	17554.4	8709.49	8935.09	8104.91	9285.31	16028.2	7652.91	15362.4	8935.09	10582.6	7321.52	1	0	0	0	0	0				x	x		x
A0A2Z6ZU04_9LAMI	2	2	19.72	0.695293	0.78744	1.25851	0.0626484	Ctrl	Mutant	29598	Cation/H(+) antiporter 15-like OS=Dorcoceras hygrometricum OX=472368 GN=F511_46274 PE=4 SV=1	722.433	1794.62	390.413	983.8	1154.49	171.944	1182.22	782.372	688.637	983.8	1507.42	135.579	2	1	1	2	2	0				x	x		x
A0A2Z6ZWN9_9LAMI	3	3	27.99	0.303568	0.654563	1.26418	0.150837	Ctrl	Mutant	20404	Putative tetraacyldisaccharide 4'-kinase, mitochondrial OS=Dorcoceras hygrometricum OX=472368 GN=F511_45211 PE=4 SV=1	7527.51	11939.8	6871.46	7354.81	6639.08	6840.86	12318.3	5205.2	12120.4	7354.81	8668.62	5394.05	4	2	2	4	2	2				x	x		x
A0A2Z6ZYB2_9LAMI	8	6	107.06	0.695311	0.78744	1.11994	0.0626468	Ctrl	Mutant	47993	Glutamine synthetase OS=Dorcoceras hygrometricum OX=472368 GN=F511_44208 PE=3 SV=1	5718.97	8766.38	4686.52	5899.7	5062.11	6156.79	9358.74	3821.73	8266.41	5899.7	6609.58	4854.66	3	1	2	3	4	2				x	x		x
A0A2Z6ZZ34_9LAMI	5	3	64.11	0.877183	0.78744	1.03689	0.0519274	Ctrl	Mutant	28161	2-cysteine peroxiredoxin B OS=Dorcoceras hygrometricum OX=472368 GN=F511_43141 PE=4 SV=1	1165.32	1684.64	1138.69	1214.97	1195.96	1435.82	1906.97	734.427	2008.5	1214.97	1561.56	1132.15	3	3	2	2	3	4				x	x		x
A0A2Z6ZZU6_9LAMI	12	2	335.45	0.0451099	0.42658	1.29379	0.585508	Ctrl	Mutant	70957	Heat shock cognate 70 kDa protein OS=Dorcoceras hygrometricum OX=472368 GN=F511_41555 PE=3 SV=1	1256.68	1449.66	1468.03	1011.21	973.151	1242.11	2056.48	631.986	2589.41	1011.21	1270.64	979.409	0	0	0	1	0	1	x			x	x		x
A0A2Z7A0G5_9LAMI	10	7	313.54	0.836078	0.78744	1.02048	0.0534659	Ctrl	Mutant	72399	Fructose-bisphosphate aldolase OS=Dorcoceras hygrometricum OX=472368 GN=F511_38017 PE=3 SV=1	4051.52	4889.11	3912.51	4317.85	4148.53	4128.79	6630.06	2131.43	6901.16	4317.85	5416.73	3255.57	9	2	5	6	4	1				x	x		x
A0A2Z7A2X6_9LAMI	3	2	17.98	0.824005	0.78744	1.04741	0.0540084	Ctrl	Mutant	34675	Guanylate kinase-like OS=Dorcoceras hygrometricum OX=472368 GN=F511_29418 PE=3 SV=1	363.258	498.323	326.271	419.542	376.428	338.114	594.449	217.246	575.5	419.542	491.5	266.605	1	1	1	0	0	0				x	x		x
A0A2Z7A3L6_9LAMI	4	2	45.92	0.03215	0.409595	1.50741	0.678461	Ctrl	Mutant	15808	Uncharacterized protein OS=Dorcoceras hygrometricum OX=472368 GN=F511_29331 PE=4 SV=1	506.409	537.963	436.834	385.554	336.197	260.866	828.706	234.527	770.518	385.554	438.971	205.694	0	1	0	0	1	0	x	x		x	x		x
A0A2Z7A3V5_9LAMI	3	2	47.98	0.181561	0.590141	1.07188	0.239154	Ctrl	Mutant	44236	Fumarylacetoacetase-like OS=Dorcoceras hygrometricum OX=472368 GN=F511_13255 PE=4 SV=1	665.95	627.674	620.716	633.426	596.567	555.974	1089.79	273.637	1094.86	633.426	778.936	438.389	2	0	2	2	2	1				x	x		x
A0A2Z7A5R7_9LAMI	4	2	55.06	0.800719	0.78744	1.07925	0.0551758	Ctrl	Mutant	60333	Dicarboxylate transporter 1, chloroplastic OS=Dorcoceras hygrometricum OX=472368 GN=F511_44167 PE=4 SV=1	462.395	677.945	376.927	495.107	432.962	477.79	756.681	295.553	664.849	495.107	565.317	376.74	1	0	2	1	0	1				x	x		x
A0A2Z7A5U1_9LAMI	3	1	36.51	0.867436	0.78744	1.11981	0.0522499	Ctrl	Mutant	35222	HXXXD-type acyl-transferase family protein (Fragment) OS=Dorcoceras hygrometricum OX=472368 GN=F511_44042 PE=4 SV=1	858.418	1664.61	711.146	1073.87	868.274	945.994	1404.75	725.693	1254.37	1073.87	1133.7	745.922	0	0	0	0	1	0				x	x		x
A0A2Z7A7X5_9LAMI	7	2	216.26	0.158894	0.584504	1.17714	0.266158	Ctrl	Mutant	26939	V-type proton ATPase subunit E OS=Dorcoceras hygrometricum OX=472368 GN=F511_33334 PE=3 SV=1	640.805	855.908	705.989	651.071	633.745	586.422	1048.64	373.136	1245.27	651.071	827.479	462.397	2	1	3	2	1	1				x	x		x
A0A2Z7A8E1_9LAMI	3	1	45.03	0.478158	0.748617	1.19374	0.0939078	Ctrl	Mutant	23616	Uncharacterized protein OS=Dorcoceras hygrometricum OX=472368 GN=F511_28569 PE=4 SV=1	605.837	1029.78	645.832	773.654	500.723	636.8	991.415	448.935	1139.16	773.654	653.792	502.121	1	1	2	1	0	1				x	x		x
A0A2Z7A9M7_9LAMI	8	1	177.34	0.00445363	0.142928	2.22427	0.986683	Ctrl	Mutant	44153	UDP-D-apiose/UDP-D-xylose synthase 2-like OS=Dorcoceras hygrometricum OX=472368 GN=F511_38808 PE=4 SV=1	179.332	230.929	271.063	114.63	99.9254	91.7578	293.465	100.674	478.12	114.63	130.472	72.3515	1	0	1	0	1	0	x	x	x	x	x		x
A0A2Z7A050_9LAMI	5	2	115.83	0.706613	0.78744	1.1875	0.0616587	Ctrl	Mutant	68438	Molecular chaperone DnaK OS=Dorcoceras hygrometricum OX=472368 GN=F511_08496 PE=3 SV=1	154.456	212.275	568.623	106.846	157.366	523.452	252.757	92.5422	1002.98	106.846	205.473	412.745	0	0	1	0	0	2				x	x		x
A0A2Z7A195_9LAMI	4	2	29.66	0.617399	0.78744	1.07874	0.0709008	Ctrl	Mutant	106705	Putative inactive receptor kinase OS=Dorcoceras hygrometricum OX=472368 GN=F511_20363 PE=4 SV=1	330.353	462.414	380.125	374.335	417.709	295.239	540.602	201.591	670.49	374.335	545.401	232.798	1	0	0	0	0	1				x	x		x
A0A2Z7A197_9LAMI	3	1	27.66	0.514478	0.771114	1.21877	0.0866247	Ctrl	Mutant	98862	Aconitate hydratase OS=Dorcoceras hygrometricum OX=472368 GN=F511_34098 PE=3 SV=1	156.923	84.4363	137.247	126.382	164.163	20.1008	256.794	36.8103	242.087	126.382	214.347	15.8496	0	0	0	1	0	0				x	x		x
A0A2Z7A511_9LAMI	3	1	40.02	0.234925	0.637738	1.26251	0.191721	Ctrl	Mutant	33703	Uncharacterized protein OS=Dorcoceras hygrometricum OX=472368 GN=F511_11371 PE=4 SV=1	225.926	138.032	196.928	145.973	160.554	137.738	369.714	60.1753	347.356	145.973	209.634	108.607	0	0	0	0	1	0				x	x		x
A0A2Z7A803_9LAMI	7	4	42.59	0.823756	0.78744	1.06656	0.0540201	Ctrl	Mutant	25748	Uncharacterized protein OS=Dorcoceras hygrometricum OX=472368 GN=F511_02719 PE=4 SV=1	18971.7	63633.5	17860.6	29633.3	25176.7	39386.2	31046.1	27741.3	31503.9	29633.3	32873.2	31056.3	2	2	0	4	3	3				x	x		x
A0A2Z7A901_9LAMI	9	4	29.69	0.783169	0.78744	1.14509	0.0561642	Ctrl	Mutant	123299	Uncharacterized protein OS=Dorcoceras hygrometricum OX=472368 GN=F511_11091 PE=4 SV=1	785.897	1159.79	474.786	692.695	580.884	840.202	1286.07	505.613	837.46	692.695	758.459	662.504	0	3	1	0	1	0				x	x		x
A0A2Z7AAF8_9LAMI	2	1	18.17	0.0592795	0.438004	1.53814	0.509747	Ctrl	Mutant	79288	Acyltransferase-like protein chloroplastic-like OS=Dorcoceras hygrometricum OX=472368 GN=F511_30844 PE=4 SV=1	460.313	665.446	406.704	317.503	310.422	368.386	753.273	290.104	717.372	317.503	405.318	290.474	0	0	0	1	0	0		x		x	x		x
A0A2Z7AAL0_9LAMI	6	3	106.97	0.637707	0.78744	1.20914	0.0684891	Ctrl	Mutant	46638	Alpha-1,4-glucan-protein synthase OS=Dorcoceras hygrometricum OX=472368 GN=F511_14351 PE=4 SV=1	2590.54	5412.43	2578.79	2950.12	2972.66	2828.71	4239.25	2359.57	4548.65	2950.12	3881.4	2230.45	5	1	3	0	2	1				x	x		x
A0A2Z7AAN8_9LAMI	4	2	21.34	0.925805	0.802006	1.07452	0.0506981	Ctrl	Mutant	23346	Uncharacterized protein OS=Dorcoceras hygrometricum OX=472368 GN=F511_14381 PE=4 SV=1	4976.26	8419.06	3983.42	5571.73	5589.69	5012.09	8143.33	3670.32	7026.23	5571.73	7298.44	3952.06	0	0	1	0	0	1				x	x		x
A0A2Z7AB22_9LAMI	2	2	70.37	0.0141517	0.266234	2.60059	0.868339	Ctrl	Mutant	40014	Aspartic protein nepenthesin-1-like OS=Dorcoceras hygrometricum OX=472368 GN=F511_17824 PE=3 SV=1	792.089	1400.08	796.308	357.142	316.399	475.613	1296.2	610.371	1404.58	357.142	413.121	375.024	4	2	1	1	1	1	x	x	x	x	x		x
A0A2Z7ABP3_9LAMI	3	3	28.12	0.670389	0.78744	1.13161	0.0650031	Ctrl	Mutant	61243	Pyridine nucleotide-disulfide oxidoreductase domain-containing protein 2 OS=Dorcoceras hygrometricum OX=472368 GN=F511_08451 PE=4 SV=1	3959.52	7262.08	4359.81	4551.82	4307.61	4909.79	6479.51	3165.93	7690.14	4551.82	5624.43	3871.4	1	0	3	1	0	0				x	x		x
A0A2Z7AED9_9LAMI	7	4	46.94	0.937998	0.802006	1.0087	0.0504869	Ctrl	Mutant	107288	Uncharacterized protein OS=Dorcoceras hygrometricum OX=472368 GN=F511_23073 PE=3 SV=1	10789.6	17411	11038.7	12496.8	12015.4	14388.8	17656.5	7590.37	19470.8	12496.8	15688.5	11345.6	1	2	1	2	3	0				x	x		x
A0A2Z7AEH2_9LAMI	6	4	242.17	0.0752112	0.450915	1.99947	0.445303	Ctrl	Mutant	17234	Plastocyanin OS=Dorcoceras hygrometricum OX=472368 GN=F511_00970 PE=3 SV=1	7041.4	14758.9	7649.78	4373.87	3982.7	6372.38	11522.8	6434.22	13493.2	4373.87	5200.19	5024.66	7	4	6	7	3	6		x		x	x		x
A0A2Z7AEX5_9LAMI	10	6	162.67	0.374401	0.690079	1.28796	0.122079	Ctrl	Mutant	62741	Isoflavone reductase-like protein OS=Dorcoceras hygrometricum OX=472368 GN=F511_01035 PE=4 SV=1	3011.28	5137.32	4786.52	2516.06	2549.19	4977.81	4927.76	2239.63	8442.8	2516.06	3328.48	3925.03	4	0	4	3	3	4				x	x		x
A0A2Z7AEZ8_9LAMI	6	2	50.34	0.739288	0.78744	1.04285	0.0590672	Ctrl	Mutant	59191	Allene oxide synthase OS=Dorcoceras hygrometricum OX=472368 GN=F511_01073 PE=3 SV=1	1226.01	244.364	2091.64	907.414	1638.36	869.886	2006.29	106.532	3689.39	907.414	2139.2	685.91	1	0	1	0	0	1				x	x		x
A0A2Z7AGP4_9LAMI	2	1	77.34	0.958867	0.808551	1.01898	0.0502139	Ctrl	Mutant	18045	20 kDa chaperonin, chloroplastic OS=Dorcoceras hygrometricum OX=472368 GN=F511_34069 PE=3 SV=1	44724.9	89274.6	45296.5	60682.9	43327.2	71946.2	73189.5	38919.6	79897.1	60682.9	56572.2	56730	5	5	3	6	3	4				x	x		x
A0A2Z7AGP8_9LAMI	4	2	63.03	0.879106	0.78744	1.00478	0.0518668	Ctrl	Mutant	19407	Uncharacterized protein OS=Dorcoceras hygrometricum OX=472368 GN=F511_26574 PE=4 SV=1	985.197	1840.29	850.168	1324.73	966.604	1366.83	1612.21	802.283	1499.58	1324.73	1262.09	1077.75	2	2	1	1	0	1				x	x		x
A0A2Z7AGU1_9LAMI	6	3	61.07	0.31434	0.654563	1.57586	0.145763	Ctrl	Mutant	36366	Uncharacterized protein OS=Dorcoceras hygrometricum OX=472368 GN=F511_30623 PE=4 SV=1	1867.57	4897.27	2146.24	2156.1	2031.08	1467.57	3056.16	2134.98	3785.68	2156.1	2651.98	1157.18	0	0	2	0	0	1		x		x	x		x
A0A2Z7AHB1_9LAMI	8	5	177.53	0.865544	0.78744	1.03809	0.0523155	Ctrl	Mutant	45010	Uncharacterized protein OS=Dorcoceras hygrometricum OX=472368 GN=F511_26635 PE=4 SV=1	526.483	727.769	450.441	691.975	508.808	441.356	861.557	317.274	794.52	691.975	664.35	348.012	4	1	1	2	4	1				x	x		x
A0A2Z7AI93_9LAMI;A0A2Z7CAJ2_9LAMI;A0A2Z7C9A5_9LAMI	6	4	328.84	0.841365	0.78744	1.03151	0.0532415	Ctrl	Mutant	35974	Malate dehydrogenase OS=Dorcoceras hygrometricum OX=472368 GN=F511_39323 PE=3 SV=1	3176.05	4273.45	3185.38	3351.79	3429.35	3528.92	5197.41	1863.03	5618.59	3351.79	4477.69	2782.57	7	4	7	6	4	6				x	x		x
A0A2Z7AIK0_9LAMI	9	2	89.8	0.885789	0.78744	1.05226	0.051664	Ctrl	Mutant	132935	Peroxidase 64 OS=Dorcoceras hygrometricum OX=472368 GN=F511_11077 PE=4 SV=1	4177.87	6371.64	3759.98	4842.71	4461.6	4294.54	6836.83	2777.74	6632.12	4842.71	5825.5	3386.27	1	0	2	0	2	1				x	x		x
A0A2Z7AIP3_9LAMI	2	2	36.5	0.149208	0.576414	1.72932	0.279462	Ctrl	Mutant	31721	SPFH/Band 7/PHB domain-containing membrane-associated protein family isoform 1 OS=Dorcoceras hygrometricum OX=472368 GN=F511_02843 PE=4 SV=1	3408.65	6078.03	2571.99	2511.03	1835.43	2626.63	5578.03	2649.74	4536.66	2511.03	2396.51	2071.11	1	2	1	1	1	0		x		x	x		x
A0A2Z7AJ55_9LAMI	4	1	28.03	0.329055	0.660247	1.11947	0.139282	Ctrl	Mutant	54641	Acyl carrier protein OS=Dorcoceras hygrometricum OX=472368 GN=F511_24734 PE=3 SV=1	350.658	455.844	428.318	327.886	372.191	402.961	573.829	198.727	755.497	327.886	485.969	317.737	1	1	0	0	1	1				x	x		x
A0A2Z7AJG7_9LAMI	2	1	33.51	0.640923	0.78744	1.1106	0.068125	Ctrl	Mutant	44684	NADH dehydrogenase OS=Dorcoceras hygrometricum OX=472368 GN=F511_08273 PE=4 SV=1	50.7232	30.4874	28.3959	38.6966	49.3933	10.601	83.0054	13.2911	50.0866	38.6966	64.4927	8.35896	1	0	0	1	1	0				x	x		x
A0A2Z7AJI4_9LAMI	8	7	633.73	0.555183	0.777438	1.11096	0.0796303	Ctrl	Mutant	29331	Chlorophyll a-b binding protein, chloroplastic OS=Dorcoceras hygrometricum OX=472368 GN=F511_08750 PE=3 SV=1	46612	67508.9	45371.4	46946.6	42931.3	53684.4	76277.5	29430.8	80029.2	46946.6	56055.2	42330.5	10	7	12	11	10	10				x	x		x
A0A2Z7AJT5_9LAMI	19	2	1074.5	0.476338	0.748617	1.09723	0.0943019	Ctrl	Mutant	59310	ATP synthase subunit beta OS=Dorcoceras hygrometricum OX=472368 GN=F511_06381 PE=3 SV=1	891.858	1136.79	938.996	793.405	1088.49	822.77	1459.47	495.589	1656.27	793.405	1421.24	648.759	2	2	2	2	1	3				x	x		x
A0A2Z7AJV4_9LAMI	13	3	221.59	0.600572	0.78744	1.1792	0.0730533	Ctrl	Mutant	102406	Uncharacterized protein OS=Dorcoceras hygrometricum OX=472368 GN=F511_02924 PE=3 SV=1	1652.46	2874.14	1478.44	1718.85	1367.4	2006.23	2704.15	1252.99	2607.78	1718.85	1785.41	1581.93	2	1	2	2	3	1				x	x		x
A0A2Z7AKN0_9LAMI	6	4	45.08	0.435488	0.713485	1.14087	0.103983	Ctrl	Mutant	108781	ABC transporter A family member 2-like OS=Dorcoceras hygrometricum OX=472368 GN=F511_02838 PE=4 SV=1	1118.62	1696.95	1229.66	1290.73	1177.31	1077.69	1830.55	739.79	2168.95	1290.73	1537.2	849.762	5	0	1	2	3	2				x	x		x
A0A2Z7AKS6_9LAMI	6	2	52.92	0.914782	0.802006	1.01676	0.0509222	Ctrl	Mutant	36962	Guanine nucleotide-binding protein subunit beta-like protein OS=Dorcoceras hygrometricum OX=472368 GN=F511_02888 PE=4 SV=1	3916.42	7095.86	3059.18	5182.02	3505.89	5151.55	6408.97	3093.46	5396	5182.02	4577.63	4062.03	1	3	1	1	1	2				x	x		x
A0A2Z7AKV8_9LAMI	6	5	61.66	0.327083	0.660247	1.37948	0.140122	Ctrl	Mutant	36616	Uncharacterized protein OS=Dorcoceras hygrometricum OX=472368 GN=F511_17909 PE=4 SV=1	5123.09	9392.93	4449.64	4469.19	3925.76	5353.43	8383.61	4094.88	7848.59	4469.19	5125.85	4221.21	1	2	2	3	2	0				x	x		x
A0A2Z7AL27_9LAMI	3	2	31.36	0.180027	0.590141	1.70489	0.240822	Ctrl	Mutant	37647	DnaJsubfamily B member 1-like OS=Dorcoceras hygrometricum OX=472368 GN=F511_28319 PE=4 SV=1	4971.38	10178.3	4756.79	3570.46	2769.72	5335.93	8135.35	4437.25	8390.36	3570.46	3616.41	4207.41	3	2	3	2	2	3		x		x	x		x
A0A2Z7AL56_9LAMI;A0A385HDH4_9LAMI	10	1	358.21	0.175902	0.590141	1.50755	0.245416	Ctrl	Mutant	37078	Actin-7 OS=Dorcoceras hygrometricum OX=472368 GN=F511_11515 PE=3 SV=1	714.053	1262.36	618.079	541.82	575.021	604.162	1168.5	550.331	1090.21	541.82	750.803	476.385	1	1	1	1	2	1		x		x	x		x
A0A2Z7AL65_9LAMI	8	1	215.5	0.281544	0.649475	30.1789	0.162195	Ctrl	Mutant	17332	Uncharacterized protein OS=Dorcoceras hygrometricum OX=472368 GN=F511_02591 PE=3 SV=1	6.10026	0	65.9878	0	1.67741	0.711283	9.98269	0	116.394	0	2.19019	0.560851	0	0	1	0	0	0		x	x	x	x		x
A0A2Z7AL66_9LAMI	4	1	128.91	0.486155	0.751369	1.27598	0.0922107	Ctrl	Mutant	50050	WD repeat-containing protein 5-like OS=Dorcoceras hygrometricum OX=472368 GN=F511_09057 PE=3 SV=1	2581.72	4915.65	2358.91	2486.5	2005.48	3232.49	4224.82	2142.99	4160.82	2486.5	2618.55	2548.84	1	0	1	0	1	1				x	x		x
A0A2Z7ALC8_9LAMI	3	1	31.04	0.850474	0.78744	1.04163	0.0528734	Ctrl	Mutant	28939	Uncharacterized protein OS=Dorcoceras hygrometricum OX=472368 GN=F511_02628 PE=4 SV=1	406.812	1119.1	310.181	762.521	401.811	598.372	665.722	487.876	547.119	762.521	524.643	471.82	0	0	0	0	1	0				x	x		x
A0A2Z7ALL8_9LAMI	6	2	45.78	0.704562	0.78744	1.11379	0.0618343	Ctrl	Mutant	163985	Pleiotropic drug resistance protein 1-like OS=Dorcoceras hygrometricum OX=472368 GN=F511_28914 PE=3 SV=1	2377.25	3236.63	1720.81	2568.35	1801.91	2215.08	3890.23	1411.02	3035.28	2568.35	2352.75	1746.6	3	1	0	1	1	1				x	x		x
A0A2Z7AM71_9LAMI	13	6	134.7	0.53827	0.773211	1.992	0.0823996	Ctrl	Mutant	185959	Transcription elongation factor spt6 OS=Dorcoceras hygrometricum OX=472368 GN=F511_19708 PE=3 SV=1	17654.3	88730	16784	21432.1	18481.2	21918.1	28890.1	38682.2	29604.9	21432.1	24130.8	17282.6	4	2	3	1	2	3		x		x	x		x
A0A2Z7AM85_9LAMI	2	1	47.61	0.355987	0.679082	1.33134	0.128609	Ctrl	Mutant	48642	Malate dehydrogenase OS=Dorcoceras hygrometricum OX=472368 GN=F511_02593 PE=4 SV=1	3679.58	6464.82	3202.15	3578.38	2702.24	3744.26	6021.39	2818.36	5648.18	3578.38	3528.3	2952.37	1	1	1	2	0	1				x	x		x
A0A2Z7AMG3_9LAMI	5	2	93.71	0.221893	0.630946	1.42837	0.201682	Ctrl	Mutant	28251	Uncharacterized protein OS=Dorcoceras hygrometricum OX=472368 GN=F511_37389 PE=3 SV=1	3168.24	4838.13	2356.87	2756.51	2223.01	2275.79	5184.63	2109.2	4157.22	2756.51	2902.58	1794.47	3	1	0	2	3	0				x	x		x
A0A2Z7AMV1_9LAMI	5	1	77.44	0.0533467	0.434396	1.28932	0.538882	Ctrl	Mutant	22611	Uncharacterized protein OS=Dorcoceras hygrometricum OX=472368 GN=F511_32043 PE=4 SV=1	406.197	399.202	366.804	306.687	348.046	254.427	664.715	174.033	646.994	306.687	454.442	200.617	0	0	1	1	1	0				x	x		x
A0A2Z7AMY5_9LAMI	2	2	21.3	0.171417	0.584504	1.24506	0.250593	Ctrl	Mutant	35103	Uncharacterized protein OS=Dorcoceras hygrometricum OX=472368 GN=F511_05380 PE=4 SV=1	127.253	108.192	120.119	117.029	73.9629	94.5876	208.241	47.1667	211.875	117.029	96.5731	74.5828	1	0	0	1	0	0				x	x		x
A0A2Z7AN84_9LAMI	17	3	112.89	0.10389	0.506068	1.32889	0.362706	Ctrl	Mutant	167275	Chaperone protein ClpD, chloroplastic OS=Dorcoceras hygrometricum OX=472368 GN=F511_02637 PE=4 SV=1	5683.42	8422.6	7410.28	5221.3	6049.67	4920.27	9300.55	3671.86	13070.8	5221.3	7899.04	3879.66	1	0	1	1	0	0				x	x		x
A0A2Z7ANW8_9LAMI	6	3	173.64	0.871421	0.78744	1.03486	0.0521149	Ctrl	Mutant	25466	GTP-binding nuclear protein OS=Dorcoceras hygrometricum OX=472368 GN=F511_39653 PE=3 SV=1	5645.02	8337.04	6052.66	6185.74	5916.77	7257.36	9237.71	3634.56	10676.1	6185.74	7725.51	5722.47	7	7	6	5	7	3				x	x		x
A0A2Z7AP73_9LAMI	5	2	29.19	0.965255	0.810181	1.02623	0.0501526	Ctrl	Mutant	13940	Uncharacterized protein OS=Dorcoceras hygrometricum OX=472368 GN=F511_40125 PE=3 SV=1	242.41	153.486	301.329	209.333	223.231	246.841	396.689	66.9129	531.504	209.333	291.472	194.636	0	0	2	0	1	0				x	x		x
A0A2Z7APB4_9LAMI	11	4	462.98	0.6689	0.78744	1.17045	0.065152	Ctrl	Mutant	47812	Enolase OS=Dorcoceras hygrometricum OX=472368 GN=F511_35384 PE=3 SV=1	7213.48	12259.4	5697.05	7690.49	6705.45	7108.43	11804.4	5344.51	10048.9	7690.49	8755.28	5605.04	4	3	4	4	4	5				x	x		x
A0A2Z7APF3_9LAMI	2	2	47.47	0.275867	0.649475	1.18418	0.165361	Ctrl	Mutant	18515	Ferredoxin-thioredoxin reductase, variable chain-like OS=Dorcoceras hygrometricum OX=472368 GN=F511_07201 PE=4 SV=1	1332.82	1808.64	1223.89	1232.3	1153.21	1300.88	2181.08	788.483	2158.78	1232.3	1505.74	1025.75	1	0	1	1	1	0				x	x		x
A0A2Z7APR6_9LAMI	5	4	167.29	0.845454	0.78744	1.0174	0.0530734	Ctrl	Mutant	32735	Fructokinase OS=Dorcoceras hygrometricum OX=472368 GN=F511_08641 PE=3 SV=1	2758.52	3132.27	3335.55	2496.24	3209.36	3362.91	4514.15	1365.52	5883.47	2496.24	4190.45	2651.68	3	1	1	1	3	3				x	x		x
A0A2Z7APT0_9LAMI	4	1	48.13	0.11961	0.53963	1.16598	0.329007	Ctrl	Mutant	25603	RuBisCO large subunit-binding protein subunit beta, chloroplastic OS=Dorcoceras hygrometricum OX=472368 GN=F511_24508 PE=4 SV=1	191.414	210.926	220.147	199.013	157.476	177.385	313.237	91.954	388.311	199.013	205.615	139.869	0	0	0	0	1	0				x	x		x
A0A2Z7AQC9_9LAMI	5	3	180.73	0.0516499	0.434396	1.30471	0.547853	Ctrl	Mutant	20971	Uncharacterized protein (Fragment) OS=Dorcoceras hygrometricum OX=472368 GN=F511_11052 PE=4 SV=1	2351.85	3102.76	2412.18	2107.79	1885.64	2036.12	3848.66	1352.66	4254.77	2107.79	2462.07	1605.49	4	3	1	3	5	1				x	x		x
A0A2Z7AR31_9LAMI	3	1	22.94	0.983147	0.811663	1.08707	0.0500359	Ctrl	Mutant	14063	Uncharacterized protein OS=Dorcoceras hygrometricum OX=472368 GN=F511_13622 PE=4 SV=1	1818.9	4269.56	1700.74	2405.02	1839.38	2920.92	2976.51	1861.33	2999.89	2405.02	2401.67	2303.16	0	1	0	0	0	0				x	x		x
A0A2Z7ARU4_9LAMI	5	3	44.78	0.409436	0.698981	1.21509	0.111101	Ctrl	Mutant	67351	Uncharacterized protein OS=Dorcoceras hygrometricum OX=472368 GN=F511_11637 PE=4 SV=1	2931.59	4350.85	2454.42	2751.37	2287.73	2974.16	4797.36	1896.77	4329.27	2751.37	2987.09	2345.14	1	3	2	1	2	1				x	x		x
A0A2Z7ASR4_9LAMI	3	1	31.45	0.0935048	0.481262	1.95326	0.388879	Ctrl	Mutant	14497	NADH dehydrogenase OS=Dorcoceras hygrometricum OX=472368 GN=F511_01921 PE=4 SV=1	65.7843	133.813	57.0742	48.9651	44.7792	37.6624	107.652	58.3361	100.672	48.9651	58.4681	29.6971	1	1	0	0	1	0		x		x	x		x
A0A2Z7ASZ1_9LAMI	3	3	19.12	0.874475	0.78744	1.04534	0.0520144	Ctrl	Mutant	20661	Uncharacterized protein OS=Dorcoceras hygrometricum OX=472368 GN=F511_09061 PE=3 SV=1	7803.39	9999.05	5999.73	8591.95	6892.48	7285.36	12769.8	4359.12	10582.7	8591.95	8999.49	5744.55	1	0	1	0	1	0				x	x		x
A0A2Z7ATU4_9LAMI	3	2	23.18	0.877341	0.78744	1.03257	0.0519224	Ctrl	Mutant	15652	Uncharacterized protein OS=Dorcoceras hygrometricum OX=472368 GN=F511_40953 PE=4 SV=1	474.878	589.333	391.866	476.934	515.04	418.176	777.107	256.922	691.2	476.934	672.486	329.734	1	0	0	0	0	1				x	x		x
A0A2Z7ATX5_9LAMI	3	1	50.94	0.109456	0.523828	1.60031	0.350041	Ctrl	Mutant	23096	Adenylate kinase 1 OS=Dorcoceras hygrometricum OX=472368 GN=F511_14729 PE=3 SV=1	225.827	419.492	232.629	197.011	162.676	188.924	369.551	182.879	410.327	197.011	212.406	148.968	0	0	0	0	0	1		x		x	x		x
A0A2Z7AU90_9LAMI	4	2	23.23	0.521369	0.773211	1.06427	0.0853594	Ctrl	Mutant	37631	Uncharacterized protein OS=Dorcoceras hygrometricum OX=472368 GN=F511_15527 PE=4 SV=1	654.962	716.488	777.456	603.657	631.337	784.148	1071.8	312.355	1371.33	603.657	824.335	618.306	1	0	0	0	1	0				x	x		x
A0A2Z7AUB2_9LAMI	6	1	131.07	0.544337	0.775394	1.17142	0.0813848	Ctrl	Mutant	44020	UDP-D-apiose/UDP-D-xylose synthase 2 OS=Dorcoceras hygrometricum OX=472368 GN=F511_07211 PE=4 SV=1	484.304	311.118	556.985	340.705	501.904	311.893	792.533	135.633	982.45	340.705	655.335	245.929	1	0	0	0	0	0				x	x		x
A0A2Z7AW33_9LAMI	3	2	38.15	0.694807	0.78744	1.12345	0.062692	Ctrl	Mutant	69117	Mitochondrial dicarboxylate/tricarboxylate transporter DTC OS=Dorcoceras hygrometricum OX=472368 GN=F511_04754 PE=3 SV=1	1929.2	3151.42	1704.43	2255.44	1742.98	2041.03	3157.02	1373.87	3006.39	2255.44	2275.8	1609.37	0	1	0	1	0	0				x	x		x
A0A2Z7AW82_9LAMI	6	2	89.88	0.284292	0.651691	1.14266	0.1607	Ctrl	Mutant	40183	Uncharacterized protein OS=Dorcoceras hygrometricum OX=472368 GN=F511_04804 PE=4 SV=1	525.336	513.25	697.29	502.994	523.668	492.494	859.679	223.753	1229.93	502.994	683.752	388.334	1	0	0	1	1	1				x	x		x
A0A2Z7AX09_9LAMI	8	4	73.11	0.954103	0.807028	1.15475	0.0502664	Ctrl	Mutant	43956	Uncharacterized protein OS=Dorcoceras hygrometricum OX=472368 GN=F511_30412 PE=4 SV=1	3202.07	10388.6	3110.41	5151.71	4411.27	4899.98	5239.99	4528.94	5486.36	5151.71	5759.78	3863.66	2	1	3	2	2	3				x	x		x
A0A2Z7AX87_9LAMI	8	3	66.6	0.842388	0.78744	1.0648	0.053199	Ctrl	Mutant	54169	rRNA adenine N(6)-methyltransferase OS=Dorcoceras hygrometricum OX=472368 GN=F511_08903 PE=3 SV=1	407.302	498.838	749.286	515.468	402.546	636.67	666.525	217.47	1321.64	515.468	525.603	502.018	0	0	1	2	0	1				x	x		x
A0A2Z7AYM9_9LAMI	3	2	34.71	0.527615	0.773211	1.25493	0.0842422	Ctrl	Mutant	17773	Eukaryotic translation initiation factor 5A OS=Dorcoceras hygrometricum OX=472368 GN=F511_41072 PE=3 SV=1	1710.84	3154.91	1448.42	1668.24	1362.56	2000.68	2799.69	1375.39	2554.83	1668.24	1779.09	1577.55	1	1	1	1	0	2				x	x		x
A0A2Z7AZI5_9LAMI	8	2	50.02	0.510084	0.770881	1.1726	0.08745	Ctrl	Mutant	62048	2,3-bisphosphoglycerate-independent phosphoglycerate mutase-like OS=Dorcoceras hygrometricum OX=472368 GN=F511_19787 PE=4 SV=1	1316.75	4484.19	1417.85	394.217	596.605	5165.43	2154.78	1954.9	2500.91	394.217	778.985	4072.97	2	1	0	0	1	2				x	x		x
A0A2Z7B0W4_9LAMI	5	1	50.38	0.138582	0.572675	1.39376	0.295544	Ctrl	Mutant	26833	Uncharacterized protein OS=Dorcoceras hygrometricum OX=472368 GN=F511_04681 PE=4 SV=1	99.9762	163.921	107.653	78.3733	88.3566	99.8516	163.605	71.462	189.885	78.3733	115.367	78.7336	1	0	1	1	1	0				x	x		x
A0A2Z7B0Z0_9LAMI	30	2	1338.85	0.667957	0.78744	1.08721	0.0652467	Ctrl	Mutant	122433	Uncharacterized protein OS=Dorcoceras hygrometricum OX=472368 GN=F511_10975 PE=3 SV=1	1658.77	2215.38	1400.61	1636.02	1398.86	1816.78	2714.47	965.802	2470.5	1636.02	1826.49	1432.54	0	1	0	0	1	0				x	x		x
A0A2Z7B0Z3_9LAMI	2	1	21.96	0.598581	0.78744	1.06123	0.0733178	Ctrl	Mutant	17252	Ubiquitin-conjugating enzyme 36 isoform 1 OS=Dorcoceras hygrometricum OX=472368 GN=F511_04711 PE=3 SV=1	155.465	173.043	145.301	143.678	123.199	179.596	254.409	75.4386	256.291	143.678	160.86	141.613	1	0	0	1	1	0				x	x		x
A0A2Z7B2B1_9LAMI	3	1	16.96	0.922436	0.802006	1.08464	0.0507632	Ctrl	Mutant	45679	Transcription factor OS=Dorcoceras hygrometricum OX=472368 GN=F511_03235 PE=4 SV=1	30.808	13.8553	28.7793	21.9076	25.7344	20.0695	50.4154	6.04028	50.7629	21.9076	33.6013	15.825	1	0	0	0	0	0				x	x		x
A0A2Z7B2C5_9LAMI	22	7	1132.42	0.799616	0.78744	1.09334	0.0552351	Ctrl	Mutant	50802	Phosphoglycerate kinase OS=Dorcoceras hygrometricum OX=472368 GN=F511_11601 PE=3 SV=1	13310.2	24043.5	13744.9	14433.4	17813.2	14489.5	21781.3	10481.8	24244.1	14433.4	23258.7	11425	8	5	7	10	8	4				x	x		x
A0A2Z7B3E5_9LAMI	7	1	169.03	0.842345	0.78744	1.00308	0.0532008	Ctrl	Mutant	29068	14-3-3-like protein-like OS=Dorcoceras hygrometricum OX=472368 GN=F511_13696 PE=3 SV=1	5843.02	8876.62	3229.04	7278.78	5023.94	5590.93	9561.74	3869.79	5695.61	7278.78	6559.75	4408.48	0	0	0	0	0	1				x	x		x
A0A2Z7B3H4_9LAMI	8	4	44.5	0.50142	0.764138	1.31264	0.0891206	Ctrl	Mutant	58656	Uncharacterized protein OS=Dorcoceras hygrometricum OX=472368 GN=F511_15648 PE=4 SV=1	8450.85	15503.7	6442.69	8488.89	9381.73	5286.77	13829.3	6758.9	11364.1	8488.89	12249.7	4168.65	0	1	2	0	1	2				x	x		x
A0A2Z7B3J6_9LAMI	5	2	136.03	0.944183	0.802006	1.01418	0.0503943	Ctrl	Mutant	25658	Triosephosphate isomerase family protein OS=Dorcoceras hygrometricum OX=472368 GN=F511_06043 PE=3 SV=1	1073.79	1316.18	683.245	1270.9	1128.24	631.124	1757.19	573.793	1205.15	1270.9	1473.14	497.645	2	0	3	3	3	2				x	x		x
A0A2Z7B3M1_9LAMI	7	2	148.09	0.114281	0.538552	1.45749	0.339734	Ctrl	Mutant	45199	Uncharacterized protein OS=Dorcoceras hygrometricum OX=472368 GN=F511_06319 PE=4 SV=1	4419.99	7339.58	4787.85	3259.74	4333.78	3759.84	7233.03	3199.72	8445.15	3259.74	5658.61	2964.65	2	0	1	1	2	1				x	x		x
A0A2Z7B3N0_9LAMI	9	7	190.8	0.727498	0.78744	1.13093	0.059958	Ctrl	Mutant	17885	Uncharacterized protein OS=Dorcoceras hygrometricum OX=472368 GN=F511_06329 PE=3 SV=1	3840.83	7556.31	4348.5	4743.98	4489.4	4689.33	6285.27	3294.2	7670.18	4743.98	5861.8	3697.57	6	4	6	7	5	3				x	x		x
A0A2Z7B4G4_9LAMI	7	4	157.65	0.0779584	0.45284	1.51378	0.435814	Ctrl	Mutant	33657	Thylakoid lumenal 29 kDa protein, chloroplastic OS=Dorcoceras hygrometricum OX=472368 GN=F511_13695 PE=3 SV=1	1342.06	1889.04	1130.48	1039.47	1018.76	823.014	2196.19	823.533	1994.02	1039.47	1330.19	648.951	5	1	3	2	3	2		x		x	x		x
A0A2Z7B4Q5_9LAMI	3	2	109.78	0.203828	0.617797	1.29319	0.217077	Ctrl	Mutant	20191	Non-specific lipid transfer protein GPI-anchored 1 OS=Dorcoceras hygrometricum OX=472368 GN=F511_30057 PE=4 SV=1	1959.17	2934.32	1832.61	1860.19	1783.72	1557.25	3206.06	1279.23	3232.48	1860.19	2328.99	1227.9	4	3	3	3	2	0				x	x		x
A0A2Z7B4Z9_9LAMI	5	2	85.08	0.323289	0.660247	1.09964	0.141763	Ctrl	Mutant	23625	Uncharacterized protein OS=Dorcoceras hygrometricum OX=472368 GN=F511_13738 PE=4 SV=1	1833.73	2134.93	1743.08	1907.71	1725.13	1561.36	3000.79	930.73	3074.56	1907.71	2252.5	1231.14	1	0	0	0	0	1				x	x		x
A0A2Z7B6R7_9LAMI	2	1	36.85	0.634137	0.78744	1.13435	0.0688989	Ctrl	Mutant	41748	Thioredoxin OS=Dorcoceras hygrometricum OX=472368 GN=F511_04665 PE=4 SV=1	724.917	1301.22	856.781	713.903	668.232	1159.33	1186.28	567.271	1511.25	713.903	872.509	914.142	2	1	1	0	0	0				x	x		x
A0A2Z7B6U3_9LAMI	8	2	128.78	0.115603	0.539057	2.10575	0.337012	Ctrl	Mutant	30126	Uncharacterized protein OS=Dorcoceras hygrometricum OX=472368 GN=F511_22734 PE=3 SV=1	5204.91	14242.5	6097.96	4608.22	3470.11	4052.93	8517.51	6209.06	10756	4608.22	4530.91	3195.76	3	2	2	2	2	1		x	x	x	x		x
A0A2Z7B7Z2_9LAMI	4	1	41.46	0.721065	0.78744	1.12969	0.060465	Ctrl	Mutant	24697	Elongation factor 1-beta OS=Dorcoceras hygrometricum OX=472368 GN=F511_05734 PE=3 SV=1	1072.4	1953.06	1047.04	1169.2	1148.84	1286.93	1754.92	851.444	1846.84	1169.2	1500.04	1014.75	1	1	2	2	1	2				x	x		x
A0A2Z7B8Q7_9LAMI;A0A2Z7BLR0_9LAMI;A0A2Z7D1N0_9LAMI	4	4	140.95	0.091171	0.478274	1.77192	0.395277	Ctrl	Mutant	16894	Calmodulin-7 OS=Dorcoceras hygrometricum OX=472368 GN=F511_04147 PE=4 SV=1	3019.21	4935.58	4729.88	2078.3	1634.55	3445.88	4940.75	2151.68	8342.9	2078.3	2134.23	2717.1	5	4	5	2	1	4		x		x	x		x
A0A2Z7B8R0_9LAMI	6	5	57.96	0.236103	0.637738	1.15721	0.190863	Ctrl	Mutant	34481	ATP synthase subunit O, mitochondrial OS=Dorcoceras hygrometricum OX=472368 GN=F511_13010 PE=3 SV=1	1305.22	1504.21	1098.49	1113.8	1213.87	1049.34	2135.91	655.767	1937.59	1113.8	1584.94	827.414	2	0	2	1	1	0				x	x		x
A0A2Z7B9Y2_9LAMI	20	2	1220.4	0.0648039	0.438004	1.32302	0.485364	Ctrl	Mutant	59700	ATP synthase subunit beta OS=Dorcoceras hygrometricum OX=472368 GN=F511_14980 PE=3 SV=1	2720	2786.5	3142.46	1840.58	2631.31	2065.41	4451.12	1214.78	5542.89	1840.58	3435.69	1628.59	4	2	4	2	2	1				x	x		x
A0A2Z7B065_9LAMI	10	4	54.26	0.942893	0.802006	1.10002	0.0504128	Ctrl	Mutant	134952	Uncharacterized protein OS=Dorcoceras hygrometricum OX=472368 GN=F511_21605 PE=4 SV=1	844.251	3664.4	907.843	1564.12	546.809	2813.08	1381.56	1597.51	1601.32	1564.12	713.967	2218.13	0	0	1	0	1	2				x	x		x
A0A2Z7B121_9LAMI	14	4	334.46	0.537827	0.773211	1.03765	0.0824747	Ctrl	Mutant	57353	Serine hydroxymethyltransferase OS=Dorcoceras hygrometricum OX=472368 GN=F511_25859 PE=3 SV=1	987.303	1120.37	1119.15	1020.58	1104.84	984.314	1615.66	488.43	1974.03	1020.58	1442.59	776.137	2	0	1	0	4	1				x	x		x
A0A2Z7B129_9LAMI	2	2	31.11	0.244129	0.637738	1.26912	0.185191	Ctrl	Mutant	38676	Uncharacterized protein OS=Dorcoceras hygrometricum OX=472368 GN=F511_11614 PE=4 SV=1	470.98	587.421	763.497	407.943	469.863	557.754	770.73	256.088	1346.71	407.943	613.499	439.792	0	1	1	0	0	1				x	x		x
A0A2Z7B277_9LAMI	5	3	131.48	0.732913	0.78744	1.18208	0.0595428	Ctrl	Mutant	38619	Uncharacterized protein OS=Dorcoceras hygrometricum OX=472368 GN=F511_04810 PE=4 SV=1	1599.56	3691.35	1801.36	2084.85	1817.75	2097.24	2617.59	1609.26	3177.36	2084.85	2373.43	1653.69	2	3	3	4	5	3				x	x		x
A0A2Z7B379_9LAMI	5	3	22.65	0.0665638	0.438004	1.2642	0.478085	Ctrl	Mutant	59632	Uncharacterized protein OS=Dorcoceras hygrometricum OX=472368 GN=F511_03243 PE=4 SV=1	540.484	622.114	517.491	458.836	379.656	490.48	884.467	271.213	912.787	458.836	495.715	386.746	0	1	0	1	2	0				x	x		x
A0A2Z7B392_9LAMI	6	3	65.74	0.833867	0.78744	1.14776	0.0535621	Ctrl	Mutant	47077	Monodehydroascorbate reductase OS=Dorcoceras hygrometricum OX=472368 GN=F511_36668 PE=4 SV=1	6169.83	12107.7	4792.39	7623.98	6696.31	5779.64	10096.5	5278.39	8453.15	7623.98	8743.36	4557.28	0	2	2	2	4	1				x	x		x
A0A2Z7B405_9LAMI	7	5	76.34	0.889089	0.78744	1.08552	0.0515683	Ctrl	Mutant	63863	Uncharacterized protein OS=Dorcoceras hygrometricum OX=472368 GN=F511_15595 PE=3 SV=1	5666.32	9223.91	4022.25	5880.34	4476.07	7066.05	9272.58	4021.2	7094.73	5880.34	5844.39	5571.62	4	3	3	3	4	3				x	x		x
A0A2Z7B407_9LAMI	4	3	73.8	0.862415	0.78744	1.03651	0.0524262	Ctrl	Mutant	40472	Pyruvate dehydrogenase E1 component subunit beta OS=Dorcoceras hygrometricum OX=472368 GN=F511_32009 PE=4 SV=1	1458.99	1998.13	1365.38	1588.63	1506.67	1557.31	2387.55	871.092	2408.35	1588.63	1967.26	1227.95	1	1	1	1	2	1				x	x		x
A0A2Z7B524_9LAMI	5	1	86.51	0.78649	0.78744	1.04283	0.0559698	Ctrl	Mutant	21820	40S ribosomal protein S7 OS=Dorcoceras hygrometricum OX=472368 GN=F511_33099 PE=3 SV=1	197.642	278.789	217.572	195.134	208.525	261.841	323.429	121.539	383.769	195.134	272.271	206.463	1	0	1	0	1	0				x	x		x
A0A2Z7B652_9LAMI	2	2	27.43	0.988043	0.811663	1.01622	0.050018	Ctrl	Mutant	28913	Protein phosphatase 2C 70 OS=Dorcoceras hygrometricum OX=472368 GN=F511_36716 PE=4 SV=1	1135.7	1759.27	1175.12	1449.43	1238.94	1316.74	1858.5	766.962	2072.76	1449.43	1617.68	1038.26	1	3	2	2	2	2				x	x		x
A0A2Z7B870_9LAMI	2	2	45.95	0.831188	0.78744	1.11186	0.0536805	Ctrl	Mutant	13823	Uncharacterized protein OS=Dorcoceras hygrometricum OX=472368 GN=F511_17344 PE=4 SV=1	1382.13	2344.19	1023.99	1272.95	1210.65	1788.81	2261.77	1021.96	1806.19	1272.95	1580.75	1410.49	2	1	1	0	1	2				x	x		x
A0A2Z7BAX7_9LAMI	5	2	71.23	0.190179	0.603439	1.4964	0.230152	Ctrl	Mutant	14431	Histone H2A OS=Dorcoceras hygrometricum OX=472368 GN=F511_00457 PE=3 SV=1	2402.98	4440.56	2394.86	2003.07	1669.18	2501.52	3932.33	1935.88	4224.22	2003.07	2179.45	1972.47	2	2	2	3	2	2				x	x		x
A0A2Z7BAY2_9LAMI	4	2	141.59	0.679882	0.78744	1.22438	0.0640761	Ctrl	Mutant	62238	Chlorophyll a-b binding protein, chloroplastic OS=Dorcoceras hygrometricum OX=472368 GN=F511_05514 PE=3 SV=1	6472.55	13202	5167.65	6154.39	5267.82	8867.38	10591.9	5755.45	9115.06	6154.39	6878.18	6991.98	2	0	1	1	2	0				x	x		x
A0A2Z7BB00_9LAMI	4	2	40.55	0.921301	0.802006	1.01704	0.0507858	Ctrl	Mutant	65561	Ubiquitinyl hydrolase 1 OS=Dorcoceras hygrometricum OX=472368 GN=F511_00477 PE=3 SV=1	1006.17	1546.14	798.614	1147.33	1040.87	1106.58	1646.54	674.045	1408.65	1147.33	1359.06	872.542	1	2	0	0	0	0				x	x		x
A0A2Z7BB40_9LAMI	3	3	49.99	0.434212	0.713485	1.70843	0.104313	Ctrl	Mutant	11124	Uncharacterized protein OS=Dorcoceras hygrometricum OX=472368 GN=F511_00517 PE=4 SV=1	4227.74	8366.84	1928.54	2268.23	2320.48	3912.13	6918.42	3647.55	3401.7	2268.23	3029.85	3084.74	2	2	1	0	1	0		x		x	x		x
A0A2Z7BB43_9LAMI;A0A1W5T1P5_9LAMI	4	2	67.51	0.383907	0.693372	1.2089	0.118924	Ctrl	Mutant	16076	Uncharacterized protein OS=Dorcoceras hygrometricum OX=472368 GN=F511_42603 PE=3 SV=1	115.94	161.035	205.394	130.286	129.771	138.958	189.728	70.204	362.289	130.286	169.442	109.569	1	0	2	0	0	0				x	x		x
A0A2Z7BBT3_9LAMI	5	4	221.69	0.79381	0.78744	1.04825	0.0555536	Ctrl	Mutant	37700	Uncharacterized protein OS=Dorcoceras hygrometricum OX=472368 GN=F511_28434 PE=4 SV=1	5997.86	8544.15	6024.5	6345.46	6329.24	6945.16	9815.12	3724.86	10626.4	6345.46	8264.07	5476.3	5	4	5	3	5	3				x	x		x
A0A2Z7BBW1_9LAMI	6	2	41.8	0.646325	0.78744	2.21903	0.0675241	Ctrl	Mutant	43249	Uncharacterized protein OS=Dorcoceras hygrometricum OX=472368 GN=F511_00544 PE=4 SV=1	5737.81	49395.9	7716.79	7829.03	8046.92	12447.5	9389.57	21534.3	13611.4	7829.03	10506.8	9814.93	1	0	0	0	1	2		x	x	x	x		x
A0A2Z7BCB8_9LAMI	3	1	39.03	0.380241	0.693372	1.17187	0.120125	Ctrl	Mutant	44441	Patatin OS=Dorcoceras hygrometricum OX=472368 GN=F511_00471 PE=3 SV=1	241.805	257.85	308.695	167.116	300.4	222.28	395.699	112.411	544.498	167.116	392.231	175.269	1	0	1	1	1	0				x	x		x
A0A2Z7BCI2_9LAMI	7	3	171.72	0.413837	0.700676	1.19369	0.109841	Ctrl	Mutant	18666	Uncharacterized protein OS=Dorcoceras hygrometricum OX=472368 GN=F511_42004 PE=4 SV=1	2191.47	3694.93	2383.49	2158.15	2338.01	2431.81	3586.2	1610.82	4204.16	2158.15	3052.73	1917.5	4	2	5	5	6	4				x	x		x
A0A2Z7BCK4_9LAMI	5	4	47.85	0.755814	0.78744	1.03357	0.0578991	Ctrl	Mutant	24736	Ribosomal protein L15 OS=Dorcoceras hygrometricum OX=472368 GN=F511_21676 PE=3 SV=1	1706.17	2239.48	1941.83	1891.13	1819.58	1985.57	2792.04	976.31	3425.14	1891.13	2375.82	1565.63	1	0	2	3	3	3				x	x		x
A0A2Z7BDK9_9LAMI	3	3	70.43	0.394436	0.695763	1.13838	0.115588	Ctrl	Mutant	22762	Nucleoside diphosphate kinase OS=Dorcoceras hygrometricum OX=472368 GN=F511_07360 PE=3 SV=1	698.767	959.288	753.634	647.759	622.338	848.427	1143.49	418.205	1329.31	647.759	812.585	668.989	2	2	3	1	2	2				x	x		x
A0A2Z7BDQ6_9LAMI	5	3	25.67	0.130382	0.55351	1.64592	0.309182	Ctrl	Mutant	72809	Uncharacterized protein OS=Dorcoceras hygrometricum OX=472368 GN=F511_32775 PE=4 SV=1	1753.88	2989.33	1390.22	1333.57	1076.99	1315.89	2870.12	1303.21	2452.17	1333.57	1406.22	1037.59	5	2	2	1	1	1		x		x	x		x
A0A2Z7BEM7_9LAMI	8	4	49.61	0.888838	0.78744	1.02679	0.0515755	Ctrl	Mutant	115154	Protein transport protein Sec24-like OS=Dorcoceras hygrometricum OX=472368 GN=F511_20683 PE=4 SV=1	2765.29	3901.91	2870.94	2907.07	2828.56	3553.65	4525.23	1701.05	5063.96	2907.07	3693.25	2802.07	1	0	2	1	1	3				x	x		x
A0A2Z7BEP3_9LAMI	5	2	47.28	0.288683	0.654563	1.20308	0.158359	Ctrl	Mutant	81098	Pentatricopeptide repeat-containing protein mitochondrial OS=Dorcoceras hygrometricum OX=472368 GN=F511_01434 PE=4 SV=1	2205.11	2581.35	1665.39	1883.2	1894.52	1585.07	3608.53	1125.35	2937.54	1883.2	2473.67	1249.84	0	1	1	2	3	1				x	x		x
A0A2Z7BES8_9LAMI	4	1	125.58	0.797033	0.78744	1.07537	0.0553755	Ctrl	Mutant	15190	Uncharacterized protein OS=Dorcoceras hygrometricum OX=472368 GN=F511_01474 PE=3 SV=1	276.231	473.832	305.14	290.006	311.821	379.418	452.034	206.569	538.227	290.006	407.143	299.173	1	2	2	1	1	1				x	x		x
A0A2Z7BEU1_9LAMI	8	3	117.81	0.0136656	0.266234	2.06943	0.87462	Ctrl	Mutant	15349	Uncharacterized protein (Fragment) OS=Dorcoceras hygrometricum OX=472368 GN=F511_01484 PE=4 SV=1	471.771	621.987	819.811	294.672	289.337	340.675	772.024	271.157	1446.04	294.672	377.787	268.625	3	0	2	0	0	0	x	x	x	x	x		x
A0A2Z7BEU7_9LAMI	15	6	102.38	0.558578	0.777438	1.21855	0.0790965	Ctrl	Mutant	211419	Serine/threonine-protein kinase TIO OS=Dorcoceras hygrometricum OX=472368 GN=F511_23484 PE=4 SV=1	23415.1	43128.5	21014.3	26104.6	20572.3	25177.3	38317.3	18802	37066.5	26104.6	26861.1	19852.5	4	3	3	5	2	4				x	x		x
A0A2Z7BFX4_9LAMI	2	2	21.24	0.689764	0.78744	1.11771	0.0631498	Ctrl	Mutant	25665	Uncharacterized protein OS=Dorcoceras hygrometricum OX=472368 GN=F511_37099 PE=4 SV=1	150.617	95.1291	197.534	95.5592	88.6839	212.353	246.476	41.4719	348.425	95.5592	115.794	167.442	3	0	1	0	1	2				x	x		x
A0A2Z7BH72_9LAMI	8	6	328.73	0.93168	0.802006	1.02913	0.0505915	Ctrl	Mutant	33021	Lactoylglutathione lyase OS=Dorcoceras hygrometricum OX=472368 GN=F511_30505 PE=4 SV=1	4032.15	5046.94	2826	4458.17	4257.64	2852.31	6598.35	2200.23	4984.69	4458.17	5559.18	2249.06	7	7	7	3	4	3				x	x		x
A0A2Z7BHJ9_9LAMI	2	1	35.05	0.537485	0.773211	1.29869	0.0825327	Ctrl	Mutant	21876	Vesicle-associated membrane protein OS=Dorcoceras hygrometricum OX=472368 GN=F511_17798 PE=3 SV=1	2719.33	5305.01	2157.82	3170.74	2674.03	1995.54	4450.01	2312.74	3806.11	3170.74	3491.47	1573.5	0	0	1	0	0	0				x	x		x
A0A2Z7BI25_9LAMI	2	2	47.1	0.313583	0.654563	1.17997	0.14611	Ctrl	Mutant	49321	3-ketoacyl-CoA thiolase 2, peroxisomal OS=Dorcoceras hygrometricum OX=472368 GN=F511_02827 PE=3 SV=1	256.301	334.674	234.469	263.82	241.67	194.055	419.421	145.902	413.572	263.82	315.548	153.013	1	0	1	3	1	1				x	x		x
A0A2Z7BIE5_9LAMI	4	1	83.94	0.654047	0.78744	1.17446	0.0666877	Ctrl	Mutant	38419	Uncharacterized protein OS=Dorcoceras hygrometricum OX=472368 GN=F511_00565 PE=3 SV=1	813.922	1594.79	819.152	852.752	826.612	1069.02	1331.93	695.255	1444.88	852.752	1079.3	842.931	2	1	1	1	0	1				x	x		x
A0A2Z7BIH6_9LAMI	6	1	64.17	0.940462	0.802006	1.02045	0.0504488	Ctrl	Mutant	79546	U-box domain-containing protein 52-like OS=Dorcoceras hygrometricum OX=472368 GN=F511_39637 PE=4 SV=1	281.081	343.278	235.961	278.937	276.039	288.101	459.971	149.653	416.204	278.937	360.424	227.169	0	1	0	0	1	0				x	x		x
A0A2Z7BJT2_9LAMI	17	9	110.5	0.378885	0.693372	1.20956	0.120573	Ctrl	Mutant	349575	BEACH domain-containing protein lvsA OS=Dorcoceras hygrometricum OX=472368 GN=F511_29771 PE=4 SV=1	10907.8	17302.9	10359.9	10892.6	10099.2	10896.5	17850	7543.25	18273.5	10892.6	13186.4	8591.93	3	2	3	4	6	1				x	x		x
A0A2Z7BJW3_9LAMI	4	2	37.64	0.930563	0.802006	1.00162	0.0506111	Ctrl	Mutant	43891	Uncharacterized protein OS=Dorcoceras hygrometricum OX=472368 GN=F511_03701 PE=4 SV=1	1246.72	1592.15	1047.69	1339.86	1196.8	1343.62	2040.19	694.102	1847.99	1339.86	1562.66	1059.45	2	1	2	1	1	1				x	x		x
A0A2Z7BJX8_9LAMI	2	2	21.58	0.599252	0.78744	1.10356	0.0732284	Ctrl	Mutant	23140	Superoxide dismutase OS=Dorcoceras hygrometricum OX=472368 GN=F511_04896 PE=3 SV=1	1188.37	1765.55	1310.41	1313.78	994.529	1555.84	1944.69	769.7	2311.39	1313.78	1298.55	1226.79	1	1	0	1	0	2				x	x		x
A0A2Z7BKG3_9LAMI	3	3	177.48	0.666294	0.78744	1.45938	0.0654146	Ctrl	Mutant	21247	Thylakoid lumenal 15 kDa protein 1, chloroplastic-like OS=Dorcoceras hygrometricum OX=472368 GN=F511_04963 PE=4 SV=1	2586.55	7795.83	1944.12	2910.62	2104.02	3431.76	4232.73	3398.62	3429.17	2910.62	2747.21	2705.96	4	4	4	1	1	2				x	x		x
A0A2Z7BKW7_9LAMI	5	3	145.91	0.0848607	0.462978	1.13515	0.413661	Ctrl	Mutant	26145	Proteasome subunit alpha type (Fragment) OS=Dorcoceras hygrometricum OX=472368 GN=F511_36774 PE=3 SV=1	1917.29	2221.11	1886.39	1821.6	1765.88	1720.02	3137.52	968.302	3327.34	1821.6	2305.7	1356.25	4	2	1	1	2	5				x	x		x
A0A2Z7BLF6_9LAMI	7	5	75.73	0.660761	0.78744	1.17822	0.0659818	Ctrl	Mutant	63660	Protein disulfide-isomerase OS=Dorcoceras hygrometricum OX=472368 GN=F511_06870 PE=3 SV=1	1082.5	1597.56	711.707	1068.27	828.044	982.402	1771.45	696.463	1255.36	1068.27	1081.17	774.63	4	0	1	2	4	2				x	x		x
A0A2Z7BMA0_9LAMI	6	1	48.97	0.886594	0.78744	1.1002	0.0516404	Ctrl	Mutant	54103	Uncharacterized protein OS=Dorcoceras hygrometricum OX=472368 GN=F511_37645 PE=4 SV=1	634.812	2391.57	823.233	1405.92	1175.52	917.574	1038.83	1042.62	1452.08	1405.92	1534.87	723.513	1	0	0	0	0	0				x	x		x
A0A2Z7BMD6_9LAMI	10	5	212.53	0.00928547	0.211079	1.60167	0.932156	Ctrl	Mutant	11402	Histone H4 OS=Dorcoceras hygrometricum OX=472368 GN=F511_03392 PE=3 SV=1	2088.23	2482.93	2049.43	1280.34	1247.63	1605.59	3417.26	1082.44	3614.92	1280.34	1629.02	1266.02	5	1	4	1	1	1	x	x		x	x		x
A0A2Z7BMF3_9LAMI	5	3	34.32	0.969275	0.811059	1.04438	0.0501193	Ctrl	Mutant	92793	Beta-galactosidase OS=Dorcoceras hygrometricum OX=472368 GN=F511_28173 PE=3 SV=1	1275.78	2659.33	1458.52	1755.72	1624.59	1784.1	2087.73	1159.34	2572.65	1755.72	2121.22	1406.77	4	2	1	3	2	1				x	x		x
A0A2Z7BN15_9LAMI	4	2	103.48	0.665096	0.78744	1.28635	0.0655363	Ctrl	Mutant	26000	Triosephosphate isomerase, cytosolic-like (Fragment) OS=Dorcoceras hygrometricum OX=472368 GN=F511_42768 PE=3 SV=1	725.1	253.33	883.801	263.031	369.646	815.012	1186.58	110.44	1558.91	263.031	482.646	642.642	1	0	2	0	0	1				x	x		x
A0A2Z7BNJ7_9LAMI	11	3	248	0.135829	0.565685	1.6449	0.299994	Ctrl	Mutant	72624	Uncharacterized protein OS=Dorcoceras hygrometricum OX=472368 GN=F511_14240 PE=3 SV=1	32839.9	61882.6	30517.1	24169.4	21885.9	30082.8	53740.4	26977.9	53828.2	24169.4	28576.4	23720.4	0	2	1	0	2	0		x		x	x		x
A0A2Z7BNP2_9LAMI	6	1	160.46	0.00815175	0.202154	3.94994	0.946662	Ctrl	Mutant	26734	Uncharacterized protein OS=Dorcoceras hygrometricum OX=472368 GN=F511_26363 PE=3 SV=1	2715.75	5648.12	2554.26	878.247	808.782	1077.1	4444.16	2462.32	4505.37	878.247	1056.02	849.3	0	0	0	0	0	1	x	x	x	x	x		x
A0A2Z7BNT2_9LAMI	2	2	17.78	0.540556	0.773211	1.10916	0.0820143	Ctrl	Mutant	25910	Calcineurin B-like protein 3 OS=Dorcoceras hygrometricum OX=472368 GN=F511_14239 PE=4 SV=1	380.319	513.079	436.051	540.448	330.766	327.393	622.368	223.679	769.137	540.448	431.88	258.152	0	0	2	0	0	0				x	x		x
A0A2Z7BNX3_9LAMI	10	6	40.95	0.496753	0.759147	1.17577	0.090045	Ctrl	Mutant	281257	ABC transporter A family member 1-like OS=Dorcoceras hygrometricum OX=472368 GN=F511_03793 PE=4 SV=1	5749.89	9161.82	5290.4	5767.21	5133.05	6281.72	9409.33	3994.13	9331.57	5767.21	6702.21	4953.18	1	1	3	0	2	1				x	x		x
A0A2Z7BP60_9LAMI	5	4	72.02	0.0419443	0.42658	1.10998	0.605718	Ctrl	Mutant	90648	Folate-biopterin transporter 1, chloroplastic OS=Dorcoceras hygrometricum OX=472368 GN=F511_27901 PE=4 SV=1	1564.65	1614.15	1671.65	1371.86	1485.81	1512.2	2560.44	703.696	2948.58	1371.86	1940.02	1192.38	5	1	5	2	3	2	x			x	x		x
A0A2Z7BPE2_9LAMI	11	2	297.95	0.228236	0.637738	1.13057	0.196724	Ctrl	Mutant	80132	Heat shock cognate protein 80-like OS=Dorcoceras hygrometricum OX=472368 GN=F511_14242 PE=3 SV=1	598.014	528.558	649.354	504.289	588.844	477.695	978.613	230.427	1145.38	504.289	768.852	376.665	2	0	1	1	2	0				x	x		x
A0A2Z7BPN4_9LAMI	5	5	68.23	0.0704041	0.442016	1.4432	0.462946	Ctrl	Mutant	40170	3-hydroxybutyryl-CoA dehydratase OS=Dorcoceras hygrometricum OX=472368 GN=F511_22892 PE=3 SV=1	2825.76	3932.61	2778.43	2152.84	1863.22	2592.02	4624.19	1714.43	4900.79	2152.84	2432.8	2043.83	2	2	2	1	2	2				x	x		x
A0A2Z7BPP1_9LAMI	3	1	39.34	0.403366	0.696778	1.62824	0.112881	Ctrl	Mutant	35120	Uroporphyrinogen decarboxylase OS=Dorcoceras hygrometricum OX=472368 GN=F511_23592 PE=4 SV=1	29.195	8.80345	26.4495	10.0986	18.9621	10.5206	47.7758	3.8379	46.6535	10.0986	24.7588	8.29559	1	0	1	0	0	0		x		x	x		x
A0A2Z7BPZ1_9LAMI	2	1	26.32	0.313037	0.654563	1.24793	0.146361	Ctrl	Mutant	31725	L-ascorbate peroxidase 3, peroxisomal-like OS=Dorcoceras hygrometricum OX=472368 GN=F511_40593 PE=3 SV=1	275.276	200.914	201.301	190.409	228.585	123.899	450.472	87.5893	355.068	190.409	298.462	97.6953	0	0	1	0	0	0				x	x		x
A0A2Z7BQG5_9LAMI	6	2	125.43	0.0791181	0.45284	1.42248	0.431928	Ctrl	Mutant	17374	17.3 kDa class II heat shock protein OS=Dorcoceras hygrometricum OX=472368 GN=F511_15677 PE=3 SV=1	1483.78	2207.3	2032.25	1234.18	1213.63	1575.67	2428.11	962.281	3584.62	1234.18	1584.63	1242.42	2	3	2	2	2	3				x	x		x
A0A2Z7BQJ8_9LAMI	2	1	41.43	0.354436	0.679082	1.23386	0.129186	Ctrl	Mutant	15822	RAS-related GTP-binding family protein OS=Dorcoceras hygrometricum OX=472368 GN=F511_21726 PE=4 SV=1	2154.39	3321.94	1924.28	2075.81	1772.59	2149.53	3525.52	1448.21	3394.17	2075.81	2314.47	1694.92	1	2	0	1	1	0				x	x		x
A0A2Z7BR79_9LAMI;A0A2Z7D8S9_9LAMI	6	1	73.79	0.205603	0.619732	1.97044	0.215474	Ctrl	Mutant	94212	Heat shock protein 83 OS=Dorcoceras hygrometricum OX=472368 GN=F511_15052 PE=4 SV=1	43.072	18.9332	50.638	8.47664	23.9613	24.7284	70.4847	8.25398	89.3187	8.47664	31.2863	19.4985	0	0	0	0	1	0		x		x	x		x
A0A2Z7BR99_9LAMI	4	1	40.47	0.895994	0.79227	1.07601	0.0513775	Ctrl	Mutant	67836	Splicing factor 3B subunit 2 OS=Dorcoceras hygrometricum OX=472368 GN=F511_15053 PE=4 SV=1	28486.4	57895.9	29212.7	34099.4	27426	45904.3	46616.3	25239.9	51527.3	34099.4	35810	36195.8	0	0	0	1	0	0				x	x		x
A0A2Z7BRF4_9LAMI	10	4	224.73	0.626663	0.78744	1.12063	0.0697762	Ctrl	Mutant	44787	Aminomethyltransferase OS=Dorcoceras hygrometricum OX=472368 GN=F511_15103 PE=3 SV=1	12045.3	18994.9	11378.1	12650.5	11656.6	13545.1	19711.4	8280.87	20069.4	12650.5	15220	10680.4	3	2	2	6	3	2				x	x		x
A0A2Z7BRL3_9LAMI	5	3	101.49	0.92388	0.802006	1.02501	0.0507349	Ctrl	Mutant	44042	Uncharacterized protein OS=Dorcoceras hygrometricum OX=472368 GN=F511_14666 PE=4 SV=1	935.432	1468.33	975.933	971.571	938.429	1387.22	1530.78	640.124	1721.42	971.571	1225.3	1093.83	2	0	1	1	1	1				x	x		x
A0A2Z7BRL4_9LAMI	8	2	86.9	0.392134	0.695763	1.43932	0.116304	Ctrl	Mutant	35647	ATP synthase subunit gamma OS=Dorcoceras hygrometricum OX=472368 GN=F511_28170 PE=3 SV=1	221.365	459.458	581.235	239.613	271.47	365.759	362.25	200.302	1025.22	239.613	354.458	288.403	0	0	1	1	1	0				x	x		x
A0A2Z7BRR1_9LAMI	9	4	292.66	0.975878	0.811663	1.08286	0.0500735	Ctrl	Mutant	128958	Sedoheptulose-1,7-bisphosphatase, chloroplastic-like OS=Dorcoceras hygrometricum OX=472368 GN=F511_04941 PE=3 SV=1	4585.28	9171.81	3926.91	5379.2	5699.38	5252.29	7503.52	3998.49	6926.55	5379.2	7441.66	4141.46	4	3	2	2	1	4				x	x		x
A0A2Z7BVS4_9LAMI	15	2	599.62	0.51724	0.773129	1.08976	0.0861134	Ctrl	Mutant	71316	Heat shock cognate 70 kDa protein 2-like OS=Dorcoceras hygrometricum OX=472368 GN=F511_27882 PE=3 SV=1	544.706	729.734	632.522	689.744	542.063	518.091	891.378	318.13	1115.69	689.744	707.769	408.518	1	1	2	3	2	2				x	x		x
A0A2Z7BW46_9LAMI	3	1	116.08	0.245395	0.637738	1.93422	0.184322	Ctrl	Mutant	38982	Aluminum induced protein with YGL and LRDR motif OS=Dorcoceras hygrometricum OX=472368 GN=F511_37629 PE=4 SV=1	1177.71	3024.8	911.454	840.693	640.626	1162.62	1927.25	1318.67	1607.69	840.693	836.464	916.736	0	0	1	0	0	0		x		x	x		x
A0A2Z7BWQ3_9LAMI	2	2	48.56	0.921874	0.802006	1.11938	0.0507744	Ctrl	Mutant	23596	Steroid binding protein OS=Dorcoceras hygrometricum OX=472368 GN=F511_15990 PE=3 SV=1	5171.47	8941.03	3164.15	5734.39	5486.65	4213.14	8462.79	3897.87	5581.14	5734.39	7163.91	3322.09	0	1	0	1	1	3				x	x		x
A0A2Z7BXT4_9LAMI	5	2	125.35	0.749788	0.78744	1.10837	0.0583143	Ctrl	Mutant	67827	Actin-7-like OS=Dorcoceras hygrometricum OX=472368 GN=F511_29537 PE=3 SV=1	2528.33	4385.66	2408.05	2782.77	2325.85	3301.95	4137.45	1911.94	4247.49	2782.77	3036.86	2603.6	1	1	0	0	0	0				x	x		x
A0A2Z7BY39_9LAMI	11	6	252.7	0.163399	0.584504	1.42377	0.26036	Ctrl	Mutant	38210	Thiamine thiazole synthase 2, chloroplastic (Fragment) OS=Dorcoceras hygrometricum OX=472368 GN=F511_15077 PE=3 SV=1	3543.61	5853.49	3454.16	2987.05	2553.29	3485.91	5798.89	2551.85	6092.68	2987.05	3333.82	2748.66	7	3	3	2	2	2				x	x		x
A0A2Z7BY51_9LAMI	4	2	76.59	0.548805	0.777438	1.168	0.0806528	Ctrl	Mutant	21983	Uncharacterized protein (Fragment) OS=Dorcoceras hygrometricum OX=472368 GN=F511_23461 PE=3 SV=1	515.374	861.285	519.368	456.635	450.293	716.385	843.377	375.48	916.097	456.635	587.946	564.873	2	2	3	2	3	2				x	x		x
A0A2Z7BZ57_9LAMI	4	2	92.44	0.327992	0.660247	1.39393	0.139734	Ctrl	Mutant	26067	Uncharacterized protein OS=Dorcoceras hygrometricum OX=472368 GN=F511_01183 PE=4 SV=1	744.725	1431.71	654.476	668.65	659.252	702.98	1218.7	624.158	1154.41	668.65	860.783	554.304	4	1	2	2	3	1				x	x		x
A0A2Z7BZE4_9LAMI	7	3	57.98	0.238763	0.637738	1.20491	0.18895	Ctrl	Mutant	39600	Uncharacterized protein OS=Dorcoceras hygrometricum OX=472368 GN=F511_42738 PE=4 SV=1	1650.5	2017.26	1389.02	1396.51	1576.02	1224.26	2700.94	879.431	2450.05	1396.51	2057.81	965.333	1	0	0	1	1	1				x	x		x
A0A2Z7BZE6_9LAMI	11	2	340.66	0.210166	0.623158	1.19906	0.211447	Ctrl	Mutant	28883	14-3-3-like protein 16R-like OS=Dorcoceras hygrometricum OX=472368 GN=F511_28707 PE=3 SV=1	1530.4	2117.11	1666.28	1473.93	1306.64	1651.06	2504.4	922.962	2939.09	1473.93	1706.08	1301.87	2	1	0	0	1	2				x	x		x
A0A2Z7BZJ6_9LAMI;A0A2Z7AL88_9LAMI;R9WZ56_9LAMI	2	1	78.73	0.714855	0.78744	1.14675	0.0609685	Ctrl	Mutant	34146	40S ribosomal protein SA OS=Dorcoceras hygrometricum OX=472368 GN=F511_12406 PE=3 SV=1	728.516	1365.33	688.511	814.394	795.71	816.18	1192.17	595.219	1214.44	814.394	1038.96	643.563	2	2	2	1	2	1				x	x		x
A0A2Z7C1C3_9LAMI	3	1	41.83	0.976664	0.811663	1.05531	0.0500688	Ctrl	Mutant	27757	Putative inactive receptor kinase OS=Dorcoceras hygrometricum OX=472368 GN=F511_33298 PE=4 SV=1	722.375	1247.43	550.343	841.305	620.832	925.923	1182.12	543.821	970.733	841.305	810.618	730.095	0	0	0	0	0	1				x	x		x
A0A2Z7C1H3_9LAMI	5	3	31.33	0.391355	0.695763	1.37527	0.116547	Ctrl	Mutant	65475	Delphilin-like OS=Dorcoceras hygrometricum OX=472368 GN=F511_14776 PE=4 SV=1	9038.17	18466	8555.98	9254.17	6607.75	10358.5	14790.4	8050.3	15091.6	9254.17	8627.71	8167.77	3	2	1	1	3	1				x	x		x
A0A2Z7C1Z4_9LAMI	19	5	750.05	0.936995	0.802006	1.05243	0.0505028	Ctrl	Mutant	48589	Glyceraldehyde-3-phosphate dehydrogenase OS=Dorcoceras hygrometricum OX=472368 GN=F511_29194 PE=3 SV=1	6641.37	10884.2	5831.47	7205.16	6777.61	8210.56	10868.2	4745	10286	7205.16	8849.51	6474.07	3	2	0	1	3	2				x	x		x
A0A2Z7C2P1_9LAMI	9	5	48.84	0.408358	0.698981	1.23069	0.111414	Ctrl	Mutant	173532	Uncharacterized protein OS=Dorcoceras hygrometricum OX=472368 GN=F511_27130 PE=4 SV=1	3747.26	6440.69	4365.97	3603.12	3076.66	5146.04	6132.16	2807.84	7700.99	3603.12	4017.19	4057.69	2	2	3	3	1	1				x	x		x
A0A2Z7C3E8_9LAMI	3	2	141.27	0.799013	0.78744	1.12293	0.0552677	Ctrl	Mutant	23330	Uncharacterized protein OS=Dorcoceras hygrometricum OX=472368 GN=F511_38416 PE=3 SV=1	5214.64	9987.71	4804.83	6073.8	4934.19	6809.02	8533.43	4354.18	8475.09	6073.8	6442.56	5368.95	3	2	3	2	1	2				x	x		x
A0A2Z7C3I3_9LAMI	6	1	55.02	0.084244	0.462978	1.72995	0.415549	Ctrl	Mutant	32690	Hypersensitive-induced response protein 4-like OS=Dorcoceras hygrometricum OX=472368 GN=F511_14035 PE=4 SV=1	493.489	794.096	485.247	313.472	248.863	462.451	807.563	346.189	855.913	313.472	324.939	364.645	1	0	1	0	0	0		x		x	x		x
A0A2Z7C3X1_9LAMI	15	6	244.26	0.774555	0.78744	1.06863	0.0566845	Ctrl	Mutant	167390	Uncharacterized protein OS=Dorcoceras hygrometricum OX=472368 GN=F511_29793 PE=4 SV=1	5214.36	7585.17	4701.31	5521.73	5216.01	5639.22	8532.98	3306.78	8292.5	5521.73	6810.53	4446.56	5	5	2	2	2	0				x	x		x
A0A2Z7C4F8_9LAMI	11	4	91.49	0.997359	0.812869	1.021	0.0500009	Ctrl	Mutant	85560	Uncharacterized protein OS=Dorcoceras hygrometricum OX=472368 GN=F511_15366 PE=4 SV=1	4197.08	5972.91	3592.05	4398.47	4212.08	4868.49	6868.26	2603.91	6335.9	4398.47	5499.7	3838.83	4	1	1	2	1	2				x	x		x
A0A2Z7C4H9_9LAMI;A0A2Z6ZV35_9LAMI	10	2	259.95	0.448667	0.729514	1.14564	0.100676	Ctrl	Mutant	27809	40S ribosomal protein S4 OS=Dorcoceras hygrometricum OX=472368 GN=F511_33492 PE=3 SV=1	1172.14	1798.29	1207.48	1219.33	1184.71	1242.73	1918.13	783.971	2129.83	1219.33	1546.87	979.902	2	2	0	2	3	0				x	x		x
A0A2Z7C4L6_9LAMI	19	4	835.72	0.599755	0.78744	1.06303	0.0731616	Ctrl	Mutant	48998	Glyceraldehyde-3-phosphate dehydrogenase OS=Dorcoceras hygrometricum OX=472368 GN=F511_33002 PE=3 SV=1	738.22	671.317	763.768	679.385	830.378	534.69	1208.05	292.663	1347.19	679.385	1084.22	421.606	1	0	2	1	3	0				x	x		x
A0A2Z7C4S6_9LAMI	6	2	48.78	0.975607	0.811663	1.04182	0.0500752	Ctrl	Mutant	68219	Uncharacterized protein OS=Dorcoceras hygrometricum OX=472368 GN=F511_32705 PE=4 SV=1	863.593	1578.22	823.731	920.769	923.153	1290.55	1413.22	688.032	1452.95	920.769	1205.36	1017.61	0	1	0	1	0	0				x	x		x
A0A2Z7C7F7_9LAMI	7	4	83.59	0.38213	0.693372	1.38662	0.119504	Ctrl	Mutant	61389	Uncharacterized protein OS=Dorcoceras hygrometricum OX=472368 GN=F511_21346 PE=4 SV=1	1767.16	3451.93	1536.03	1964.86	1236.01	1670.77	2891.85	1504.88	2709.35	1964.86	1613.85	1317.41	2	2	2	2	1	2				x	x		x
A0A2Z7C8E4_9LAMI	5	1	44.74	0.307215	0.654563	1.54155	0.149086	Ctrl	Mutant	84474	Oxysterol-binding protein-related protein 2A-like OS=Dorcoceras hygrometricum OX=472368 GN=F511_32297 PE=4 SV=1	285.642	388.966	635.323	278.033	132.186	439.532	467.435	169.571	1120.63	278.033	172.595	346.574	0	0	1	0	0	0		x		x	x		x
A0A2Z7C8T5_9LAMI	18	12	650.46	0.146025	0.576414	1.34049	0.284105	Ctrl	Mutant	74284	ATP-dependent zinc metalloprotease FTSH 2, chloroplastic OS=Dorcoceras hygrometricum OX=472368 GN=F511_07967 PE=3 SV=1	9034.33	13718.9	8679.46	8397.04	7627.9	7423.66	14784.1	5980.8	15309.4	8397.04	9959.73	5853.6	9	4	14	8	9	9				x	x		x
A0A2Z7C9I9_9LAMI	2	1	38.92	0.869615	0.78744	1.04217	0.0521755	Ctrl	Mutant	17070	Cyanate hydratase OS=Dorcoceras hygrometricum OX=472368 GN=CYN PE=3 SV=1	492.932	705.909	455.477	534.615	477.576	575.182	806.652	307.743	803.403	534.615	623.57	453.535	0	1	0	0	0	1				x	x		x
A0A2Z7C9S2_9LAMI	6	5	111.61	0.196879	0.603439	1.46554	0.223564	Ctrl	Mutant	23858	60S ribosomal protein L13 OS=Dorcoceras hygrometricum OX=472368 GN=F511_14054 PE=3 SV=1	3282.91	6284.88	3380.87	2899.31	2696.27	3239.82	5372.28	2739.91	5963.41	2899.31	3520.51	2554.61	7	4	4	4	4	3				x	x		x
A0A2Z7C073_9LAMI	6	4	48.72	0.88534	0.78744	1.28385	0.0516773	Ctrl	Mutant	20088	Uncharacterized protein OS=Dorcoceras hygrometricum OX=472368 GN=F511_19389 PE=4 SV=1	1607.28	13080.6	2003.43	6840.78	3983.4	2176.84	2630.21	5702.54	3533.78	6840.78	5201.12	1716.45	3	2	4	2	2	3				x	x		x
A0A2Z7C256_9LAMI	11	5	62.38	0.983522	0.811663	1.04009	0.0500343	Ctrl	Mutant	65263	Hsp70-Hsp90 organizing protein 2 OS=Dorcoceras hygrometricum OX=472368 GN=F511_17394 PE=4 SV=1	5915.04	10859.7	6225.56	7668.56	6370.55	8074.67	9679.59	4734.32	10981.1	7668.56	8318.01	6366.92	2	0	3	2	2	1				x	x		x
A0A2Z7C259_9LAMI	3	2	54.19	0.559345	0.777438	1.17883	0.0789769	Ctrl	Mutant	19952	Adenine phosphoribosyltransferase 4 OS=Dorcoceras hygrometricum OX=472368 GN=F511_17403 PE=3 SV=1	358.073	654.935	402.052	344.628	321.261	534.501	585.964	285.521	709.167	344.628	419.469	421.457	0	0	1	2	1	0				x	x		x
A0A2Z7C347_9LAMI	8	1	124.71	0.0252214	0.393147	1.75154	0.74162	Ctrl	Mutant	35506	ADP,ATP carrier protein 1, mitochondrial-like OS=Dorcoceras hygrometricum OX=472368 GN=F511_27075 PE=3 SV=1	111.496	113.354	87.395	71.304	62.5603	44.4037	182.456	49.417	154.153	71.304	81.6848	35.0125	0	0	1	0	0	0	x	x		x	x		x
A0A2Z7C387_9LAMI	10	2	50.15	0.181724	0.590141	1.09867	0.238978	Ctrl	Mutant	111685	Delphilin-like OS=Dorcoceras hygrometricum OX=472368 GN=F511_22265 PE=4 SV=1	1183.97	1385.57	1271.1	1248.05	1137.73	1109.95	1937.5	604.043	2242.05	1248.05	1485.52	875.2	0	0	1	0	1	1				x	x		x
A0A2Z7C570_9LAMI	8	5	162.91	0.981276	0.811663	1.02245	0.0500443	Ctrl	Mutant	16026	Uncharacterized protein OS=Dorcoceras hygrometricum OX=472368 GN=F511_14037 PE=3 SV=1	4454.16	7639.28	4779.55	5507.57	4953.99	6040.95	7288.96	3330.37	8430.5	5507.57	6468.41	4763.32	3	2	4	1	2	4				x	x		x
A0A2Z7C580_9LAMI	2	2	15.68	0.64381	0.78744	1.27	0.0678021	Ctrl	Mutant	61779	Uncharacterized protein OS=Dorcoceras hygrometricum OX=472368 GN=F511_15662 PE=4 SV=1	7548.66	16672.2	6316.45	8177.47	5936.3	9931.35	12352.9	7268.3	11141.4	8177.47	7751.01	7830.92	1	1	0	1	0	0				x	x		x
A0A2Z7C745_9LAMI	6	3	52.75	0.0479168	0.430873	1.70023	0.568713	Ctrl	Mutant	77620	Uncharacterized protein OS=Dorcoceras hygrometricum OX=472368 GN=F511_34586 PE=4 SV=1	3360.03	3790.96	4097.64	1846.55	1666.32	3103.09	5498.48	1652.68	7227.7	1846.55	2175.71	2446.81	1	1	3	1	3	2	x	x		x	x		x
A0A2Z7C788_9LAMI	6	4	78.5	0.495427	0.759147	1.32181	0.090311	Ctrl	Mutant	15928	Uncharacterized protein OS=Dorcoceras hygrometricum OX=472368 GN=F511_07462 PE=4 SV=1	4393.07	9691.02	4430.77	3725.9	3292.77	6988.49	7188.98	4224.84	7815.29	3725.9	4299.36	5510.46	2	0	1	0	0	2				x	x		x
A0A2Z7C963_9LAMI	7	2	136.96	0.988241	0.811663	1.00031	0.0500175	Ctrl	Mutant	36916	1,4-Dihydroxy-2-naphthoyl-CoA synthase, peroxisomal-like OS=Dorcoceras hygrometricum OX=472368 GN=F511_36099 PE=3 SV=1	560.294	584.625	511.121	604.331	528.438	522.754	916.885	254.869	901.551	604.331	689.98	412.195	2	1	3	1	3	1				x	x		x
A0A2Z7CC36_9LAMI	7	2	52.37	0.712699	0.78744	1.09259	0.0611466	Ctrl	Mutant	95436	Uncharacterized protein OS=Dorcoceras hygrometricum OX=472368 GN=F511_19369 PE=3 SV=1	1939.04	2839.84	1676.88	2288.9	1838.68	1781.11	3173.11	1238.04	2957.8	2288.9	2400.75	1404.41	0	1	0	0	0	1				x	x		x
A0A2Z7CCQ4_9LAMI	5	2	22.98	0.75887	0.78744	1.0522	0.0576932	Ctrl	Mutant	70013	Lysosomal beta glucosidase-like OS=Dorcoceras hygrometricum OX=472368 GN=F511_19366 PE=4 SV=1	1645.46	2294.89	1627.05	1670.92	1715.38	1904.9	2692.69	1000.46	2869.91	1670.92	2239.77	1502.02	0	0	0	0	2	0				x	x		x
A0A2Z7CCS2_9LAMI	8	1	234.8	0.614857	0.78744	1.1008	0.0712168	Ctrl	Mutant	21851	Uncharacterized protein OS=Dorcoceras hygrometricum OX=472368 GN=F511_24262 PE=4 SV=1	632.387	948.412	699.218	625.753	558.77	886.705	1034.86	413.464	1233.33	625.753	729.584	699.172	1	3	1	1	1	1				x	x		x
A0A2Z7CD15_9LAMI	5	2	87.4	0.273872	0.649475	1.43569	0.166498	Ctrl	Mutant	43415	Fructokinase 3 OS=Dorcoceras hygrometricum OX=472368 GN=F511_13357 PE=3 SV=1	722.513	1371.56	638.26	610.104	613.087	679.958	1182.35	597.937	1125.81	610.104	800.506	536.151	0	0	2	1	0	1				x	x		x
A0A2Z7CDA5_9LAMI	4	3	52.42	0.714705	0.78744	1.0684	0.0609808	Ctrl	Mutant	56726	Protein disulfide-isomerase OS=Dorcoceras hygrometricum OX=472368 GN=F511_20103 PE=3 SV=1	716.4	987.013	674.216	690.238	600.022	935.15	1172.34	430.292	1189.23	690.238	783.448	737.371	0	1	1	1	0	1				x	x		x
A0A2Z7CDF7_9LAMI	2	2	42.24	0.00916672	0.211079	1.80337	0.933697	Ctrl	Mutant	10477	Uncharacterized protein OS=Dorcoceras hygrometricum OX=472368 GN=F511_29412 PE=3 SV=1	82.7868	85.5416	64.2256	41.1755	37.5475	50.232	135.475	37.2922	113.286	41.1755	49.0257	39.6082	2	0	2	0	0	0	x	x		x	x		x
A0A2Z7CEG1_9LAMI	5	4	113.84	0.617136	0.78744	1.09937	0.0709334	Ctrl	Mutant	29099	Uncharacterized protein OS=Dorcoceras hygrometricum OX=472368 GN=F511_10436 PE=3 SV=1	1190.22	1708.19	1110.26	1286.49	1062.13	1297.7	1947.72	744.694	1958.36	1286.49	1386.82	1023.24	3	2	1	2	2	2				x	x		x
A0A2Z7CEH3_9LAMI	2	2	18.68	0.878571	0.78744	1.05644	0.0518835	Ctrl	Mutant	13990	Zinc finger CCHC domain-containing protein 10-like OS=Dorcoceras hygrometricum OX=472368 GN=F511_41909 PE=4 SV=1	3064.92	4357.97	2312.72	3364.72	2360.4	3490.34	5015.54	1899.87	4079.33	3364.72	3081.97	2752.16	1	0	3	1	2	1				x	x		x
A0A2Z7CF28_9LAMI	2	2	54.38	0.848226	0.78744	1.06797	0.0529621	Ctrl	Mutant	15650	Ferredoxin-thioredoxin reductase, catalytic chain OS=Dorcoceras hygrometricum OX=472368 GN=F511_02321 PE=3 SV=1	714.194	1265.62	668.156	737.718	617.139	1124.58	1168.73	551.752	1178.54	737.718	805.797	886.74	2	2	1	2	3	2				x	x		x
A0A2Z7CFB5_9LAMI	2	1	20.62	0.800181	0.78744	1.74517	0.0552047	Ctrl	Mutant	88781	Glucose-1-phosphate adenylyltransferase large subunit 3, chloroplastic/amyloplastic-like OS=Dorcoceras hygrometricum OX=472368 GN=F511_30377 PE=3 SV=1	14.7097	1.45821	36.4167	1.92386	19.7259	8.48171	24.0715	0.635714	64.2343	1.92386	25.756	6.68788	0	0	1	0	0	0		x		x	x		x
A0A2Z7CFX6_9LAMI	2	1	52.19	0.158112	0.584504	1.5121	0.267189	Ctrl	Mutant	25081	Peptidyl-prolyl cis-trans isomerase OS=Dorcoceras hygrometricum OX=472368 GN=F511_20047 PE=3 SV=1	248.451	259.818	205.834	177.951	88.1174	206.191	406.574	113.269	363.064	177.951	115.055	162.583	0	0	0	1	0	0		x		x	x		x
A0A2Z7CFY9_9LAMI	3	2	22.25	0.130565	0.55351	1.44844	0.308865	Ctrl	Mutant	65543	TRANSPORT INHIBITOR RESPONSE 1 protein OS=Dorcoceras hygrometricum OX=472368 GN=F511_27193 PE=4 SV=1	6025.97	6295.55	4849.15	3850.57	2695.25	5308.77	9861.12	2744.57	8553.27	3850.57	3519.18	4186	0	0	0	2	0	0				x	x		x
A0A2Z7CFZ2_9LAMI	8	5	269.55	0.560022	0.777438	1.12045	0.0788715	Ctrl	Mutant	59123	Putative mitochondrial-processing peptidase subunit beta OS=Dorcoceras hygrometricum OX=472368 GN=F511_02285 PE=3 SV=1	1517.59	2249.95	1522.53	1397.52	1386.88	1936.99	2483.44	980.876	2685.55	1397.52	1810.84	1527.33	4	2	3	3	4	4				x	x		x
A0A2Z7CG67_9LAMI	3	2	55.33	0.300965	0.654563	1.59822	0.152108	Ctrl	Mutant	18136	Glycine cleavage system H protein OS=Dorcoceras hygrometricum OX=472368 GN=F511_26731 PE=3 SV=1	511.956	672.779	265.49	423.938	323.863	159.602	837.784	293.3	468.29	423.938	422.867	125.847	3	1	0	2	2	0		x		x	x		x
A0A2Z7CGG9_9LAMI	5	2	53.8	0.221327	0.630946	2.43097	0.202135	Ctrl	Mutant	234643	Protein PHOTOPERIOD-INDEPENDENT EARLY FLOWERING 1 (Fragment) OS=Dorcoceras hygrometricum OX=472368 GN=F511_31056 PE=4 SV=1	893.387	3639.73	955.619	80.1353	196.984	1980.72	1461.97	1586.76	1685.59	80.1353	257.202	1561.81	2	0	0	0	0	0		x	x	x	x		x
A0A2Z7CHG8_9LAMI	4	3	28.25	0.749565	0.78744	1.0839	0.05833	Ctrl	Mutant	44593	26S proteasome non-ATPase regulatory subunit 13A OS=Dorcoceras hygrometricum OX=472368 GN=F511_10565 PE=4 SV=1	335.908	50.5317	586.347	173.256	413.22	311.015	549.693	22.0295	1034.24	173.256	539.541	245.237	1	0	2	0	0	1				x	x		x
A0A2Z7CHK3_9LAMI	3	1	28.41	0.063813	0.438004	1.91773	0.489561	Ctrl	Mutant	33331	Uncharacterized protein OS=Dorcoceras hygrometricum OX=472368 GN=F511_23229 PE=4 SV=1	293.328	489.85	292.229	137.093	161.539	262.139	480.012	213.552	515.454	137.093	210.92	206.698	2	1	1	1	0	1		x		x	x		x
A0A2Z7CHP1_9LAMI	2	2	20.77	0.16136	0.584504	1.15925	0.262954	Ctrl	Mutant	33839	Uncharacterized protein OS=Dorcoceras hygrometricum OX=472368 GN=F511_17869 PE=4 SV=1	315.79	403.14	326.652	302.696	316.714	282.534	516.771	175.75	576.171	302.696	413.532	222.78	1	2	1	2	1	1				x	x		x
A0A2Z7CI84_9LAMI;A0A2Z7AHB2_9LAMI	5	2	145.24	0.146665	0.576414	1.25971	0.28316	Ctrl	Mutant	39437	14-3-3 protein OS=Dorcoceras hygrometricum OX=472368 GN=F511_23234 PE=3 SV=1	1118.36	1607.27	1140.54	1069.67	973.393	1026.05	1830.12	700.693	2011.77	1069.67	1270.96	809.043	1	2	2	3	4	2				x	x		x
A0A2Z7CII7_9LAMI	4	3	30.34	0.906775	0.799212	1.19974	0.0511049	Ctrl	Mutant	66818	Mitogen-activated protein kinase OS=Dorcoceras hygrometricum OX=472368 GN=F511_10618 PE=4 SV=1	1514.7	2510.33	651.843	1133.03	1204.14	1561.06	2478.72	1094.39	1149.77	1133.03	1572.25	1230.9	2	0	2	0	1	1				x	x		x
A0A2Z7CIK7_9LAMI;A0A2Z7ARG7_9LAMI	6	5	139.43	0.990972	0.811663	1.01267	0.0500103	Ctrl	Mutant	15316	Histone H3 OS=Dorcoceras hygrometricum OX=472368 GN=F511_18040 PE=3 SV=1	6811.48	10763.8	7823.22	7953.69	7282.46	9844.58	11146.6	4692.5	13799.1	7953.69	9508.69	7762.51	4	4	5	5	3	2				x	x		x
A0A2Z7CIM6_9LAMI	6	5	47.25	0.36695	0.680946	1.12427	0.124653	Ctrl	Mutant	63868	Protease Do-like 10, mitochondrial-like OS=Dorcoceras hygrometricum OX=472368 GN=F511_24087 PE=4 SV=1	11629	11804.5	9648.62	10621.3	10886.8	7917.2	19030.1	5146.22	17018.9	10621.3	14214.9	6242.76	0	1	2	4	3	1				x	x		x
A0A2Z7CIX5_9LAMI	5	1	42.96	0.418346	0.70444	1.22351	0.108575	Ctrl	Mutant	36365	Epoxide hydrolase (Fragment) OS=Dorcoceras hygrometricum OX=472368 GN=F511_10828 PE=4 SV=1	89.9273	94.2234	79.446	90.9799	89.0968	35.3671	147.16	41.077	140.132	90.9799	116.333	27.8872	1	0	2	1	0	0				x	x		x
A0A2Z7CIY0_9LAMI	6	1	46.12	0.0507281	0.434396	2.71715	0.552857	Ctrl	Mutant	112037	Pumilio2-like OS=Dorcoceras hygrometricum OX=472368 GN=F511_33925 PE=4 SV=1	420.333	934.199	409.545	217.804	136.715	294.72	687.849	407.268	722.384	217.804	178.508	232.389	0	1	0	0	0	0		x	x	x	x		x
A0A2Z7CJF3_9LAMI;R4MSF0_9LAMI	7	4	196.87	0.0879862	0.475276	1.56439	0.404349	Ctrl	Mutant	34258	60S acidic ribosomal protein P0 OS=Dorcoceras hygrometricum OX=472368 GN=F511_33921 PE=3 SV=1	9677.77	14204.5	7633.91	6206.02	7034.24	6905.78	15837.1	6192.5	13465.2	6206.02	9184.59	5445.25	4	3	6	2	2	2		x		x	x		x
A0A2Z7CJX2_9LAMI	9	7	349.77	0.366056	0.680946	1.23588	0.124967	Ctrl	Mutant	16332	Nucleoside diphosphate kinase OS=Dorcoceras hygrometricum OX=472368 GN=F511_29407 PE=3 SV=1	8128.95	13229.8	8982.96	8067.6	6264.78	10218.3	13302.5	5767.57	15844.8	8067.6	8179.9	8057.19	9	7	9	7	7	7				x	x		x
A0A2Z7CKD9_9LAMI	4	3	71.94	0.0656246	0.438004	1.1225	0.481942	Ctrl	Mutant	54858	Citrate synthase OS=Dorcoceras hygrometricum OX=472368 GN=F511_07646 PE=3 SV=1	1192.79	1103.68	1135.57	1011.04	1094.58	951.873	1951.92	481.153	2003	1011.04	1429.19	750.557	1	0	1	1	1	1				x	x		x
A0A2Z7CL93_9LAMI	7	3	47.28	0.059631	0.438004	1.39379	0.508122	Ctrl	Mutant	25480	Uncharacterized protein OS=Dorcoceras hygrometricum OX=472368 GN=F511_36836 PE=4 SV=1	1248.46	1696.81	1281.41	944.975	912.844	1174.69	2043.02	739.731	2260.24	944.975	1191.9	926.252	2	1	1	1	1	0				x	x		x
A0A2Z7CLQ8_9LAMI	5	2	59.17	0.410121	0.698981	1.62709	0.110904	Ctrl	Mutant	21172	Uncharacterized protein OS=Dorcoceras hygrometricum OX=472368 GN=F511_27671 PE=4 SV=1	7422.05	18192.6	5225.33	7427.77	5504.69	6021.58	12145.7	7931.11	9216.81	7427.77	7187.46	4748.05	4	3	2	5	2	4		x		x	x		x
A0A2Z7CM15_9LAMI	14	6	72.81	0.992312	0.811663	1.04578	0.0500075	Ctrl	Mutant	258504	DNA polymerase epsilon catalytic subunit OS=Dorcoceras hygrometricum OX=472368 GN=F511_28764 PE=3 SV=1	7033.11	12446.4	5684.9	8672.36	6518.68	8871.78	11509.2	5426.05	10027.4	8672.36	8511.43	6995.45	1	1	4	3	2	2				x	x		x
A0A2Z7CMI1_9LAMI	7	6	82.57	0.301538	0.654563	1.28286	0.151827	Ctrl	Mutant	16583	Uncharacterized protein OS=Dorcoceras hygrometricum OX=472368 GN=F511_10676 PE=3 SV=1	801.303	1283.67	1165.13	709.244	688.157	1136.08	1311.28	559.619	2055.14	709.244	898.525	895.808	3	0	3	1	1	3				x	x		x
A0A2Z7CMW2_9LAMI	6	4	165.65	0.077095	0.45284	1.15422	0.438752	Ctrl	Mutant	27261	ATP synthase delta chain, chloroplastic OS=Dorcoceras hygrometricum OX=472368 GN=F511_35399 PE=3 SV=1	2021.68	2316.6	2068.48	1778.11	2014.72	1757.89	3308.36	1009.93	3648.52	1778.11	2630.61	1386.1	2	2	4	0	2	1				x	x		x
A0A2Z7CP00_9LAMI	6	2	245.69	0.102611	0.504343	1.8369	0.365741	Ctrl	Mutant	17640	Uncharacterized protein OS=Dorcoceras hygrometricum OX=472368 GN=F511_27940 PE=3 SV=1	4421.72	8363.05	3591.1	3035.07	2763.45	3116.42	7235.87	3645.9	6334.23	3035.07	3608.23	2457.31	1	1	3	2	1	3		x		x	x		x
A0A2Z7CPL1_9LAMI	6	1	113.28	0.060827	0.438004	3.24408	0.502669	Ctrl	Mutant	28801	Uncharacterized protein OS=Dorcoceras hygrometricum OX=472368 GN=F511_09596 PE=4 SV=1	54.1906	89.5513	188.534	32.3798	22.5	47.5457	88.6795	39.0402	332.55	32.3798	29.3782	37.49	1	0	0	0	0	0		x	x	x	x		x
A0A2Z7CPQ0_9LAMI	6	3	46.99	0.0103704	0.217608	1.46493	0.917943	Ctrl	Mutant	54396	F-box/LRR-repeat protein-like OS=Dorcoceras hygrometricum OX=472368 GN=F511_11023 PE=4 SV=1	978.993	981.509	1083.12	663.676	799.495	614.479	1602.06	427.892	1910.48	663.676	1043.9	484.52	2	2	1	1	1	0	x			x	x		x
A0A2Z7CQ29_9LAMI	3	2	59.85	0.330504	0.660247	1.10495	0.138671	Ctrl	Mutant	41975	Cysteine synthase OS=Dorcoceras hygrometricum OX=472368 GN=F511_18281 PE=3 SV=1	416.97	506.399	426.902	417.1	447.894	357.026	682.345	220.766	752.999	417.1	584.814	281.517	2	1	2	3	2	2				x	x		x
A0A2Z7CQB2_9LAMI	10	6	250.46	0.266178	0.649475	1.21313	0.171013	Ctrl	Mutant	18887	Uncharacterized protein OS=Dorcoceras hygrometricum OX=472368 GN=F511_09564 PE=3 SV=1	2723.48	3989.6	2757.17	2759.41	2287.8	2759.27	4456.8	1739.28	4863.29	2759.41	2987.18	2175.7	6	4	4	4	4	4				x	x		x
A0A2Z7CQP9_9LAMI	8	6	119.94	0.0161253	0.283791	1.51812	0.843357	Ctrl	Mutant	122310	Pectinesterase OS=Dorcoceras hygrometricum OX=472368 GN=F511_16988 PE=3 SV=1	895.401	840.568	983.944	513.545	567.911	710.178	1465.27	366.449	1735.55	513.545	741.52	559.979	3	0	2	1	3	1	x	x		x	x		x
A0A2Z7CQU7_9LAMI	4	3	183.93	0.26316	0.649475	1.18982	0.172842	Ctrl	Mutant	50869	Glutamate-1-semialdehyde 2,1-aminomutase 2 OS=Dorcoceras hygrometricum OX=472368 GN=F511_16411 PE=3 SV=1	947.43	1309.72	941.542	967.997	937.49	782.904	1550.41	570.976	1660.76	967.997	1224.08	617.324	3	2	2	2	4	2				x	x		x
A0A2Z7CQV3_9LAMI	4	3	22.1	0.478886	0.748617	1.30417	0.0937511	Ctrl	Mutant	42362	S-(hydroxymethyl)glutathione dehydrogenase OS=Dorcoceras hygrometricum OX=472368 GN=F511_13217 PE=3 SV=1	1798.19	3068.01	1326.44	1339.53	1192.25	2216.56	2942.62	1337.51	2339.66	1339.53	1556.72	1747.77	1	0	2	1	1	1				x	x		x
A0A2Z7CR24_9LAMI	4	3	68.04	0.798516	0.78744	1.11991	0.0552947	Ctrl	Mutant	19738	ATP synthase subunit d, mitochondrial OS=Dorcoceras hygrometricum OX=472368 GN=F511_05250 PE=3 SV=1	7251.22	14117.1	6966.5	9094.52	6699.36	9507.08	11866.2	6154.39	12288	9094.52	8747.34	7496.38	4	5	3	6	3	4				x	x		x
A0A2Z7CRJ0_9LAMI	4	1	95.21	0.00117121	0.079873	1.39236	0.999938	Ctrl	Mutant	50263	Tubulin alpha chain OS=Dorcoceras hygrometricum OX=472368 GN=F511_24915 PE=3 SV=1	390.664	354.014	397.641	274.078	265.155	281.184	639.297	154.334	701.386	274.078	346.212	221.715	1	0	0	0	0	0	x			x	x		x
A0A2Z7CRQ6_9LAMI	11	4	258.82	0.484808	0.751369	1.38938	0.0924926	Ctrl	Mutant	80842	Transketolase OS=Dorcoceras hygrometricum OX=472368 GN=F511_30164 PE=4 SV=1	8871.76	16986.7	6254.07	10163.3	8855.26	4094.33	14518.1	7405.42	11031.4	10163.3	11562.3	3228.4	4	2	2	2	1	2				x	x		x
A0A2Z7CSB2_9LAMI	8	4	43	0.984761	0.811663	1.00104	0.0500293	Ctrl	Mutant	110177	Splicing factor 3B subunit 1-like OS=Dorcoceras hygrometricum OX=472368 GN=F511_26543 PE=4 SV=1	2048.57	2326.6	2270.96	2094.42	2387.91	2156.88	3352.36	1014.29	4005.67	2094.42	3117.88	1700.71	3	1	1	3	4	1				x	x		x
A0A2Z7CTB7_9LAMI	3	1	66.32	0.279452	0.649475	1.25358	0.16335	Ctrl	Mutant	24001	RAB GTPaseA isoform 2 OS=Dorcoceras hygrometricum OX=472368 GN=F511_08946 PE=4 SV=1	1477.06	2303.18	1466.87	1382.21	1223.01	1580.48	2417.12	1004.08	2587.37	1382.21	1596.88	1246.21	0	0	0	0	1	0				x	x		x
A0A2Z7CTZ2_9LAMI	3	3	25.98	0.843109	0.78744	1.0694	0.0531692	Ctrl	Mutant	14675	Uncharacterized protein OS=Dorcoceras hygrometricum OX=472368 GN=F511_25958 PE=4 SV=1	7670.4	12709.8	6714.03	7647.82	6582.74	11105.3	12552.1	5540.87	11842.7	7647.82	8595.07	8756.57	0	0	0	1	2	1				x	x		x
A0A2Z7CTZ4_9LAMI	3	2	18.87	0.168047	0.584504	1.40412	0.254616	Ctrl	Mutant	29851	PapD-like superfamily protein isoform 1 OS=Dorcoceras hygrometricum OX=472368 GN=F511_32962 PE=4 SV=1	4982.96	7768.69	4275.99	4253.11	3750.79	4123.04	8154.3	3386.79	7542.28	4253.11	4897.39	3251.04	1	0	1	0	0	0				x	x		x
A0A2Z7CUS8_9LAMI	14	9	1030.5	0.654122	0.78744	1.18115	0.0666797	Ctrl	Mutant	35068	Uncharacterized protein OS=Dorcoceras hygrometricum OX=472368 GN=F511_24198 PE=4 SV=1	47594.9	90642.2	43907.9	52753.4	51859.7	49597.3	77886	39515.8	77447.9	52753.4	67713	39107.7	10	11	14	11	12	11				x	x		x
A0A2Z7CVB6_9LAMI	4	3	76.27	0.807038	0.78744	1.10216	0.054843	Ctrl	Mutant	36219	Uncharacterized protein OS=Dorcoceras hygrometricum OX=472368 GN=F511_37223 PE=4 SV=1	3028.92	5345.03	2754.82	3327.39	2994.87	3774.96	4956.64	2330.19	4859.14	3327.39	3910.39	2976.58	0	2	1	4	1	2				x	x		x
A0A2Z7CVJ6_9LAMI	6	2	61.95	0.529198	0.773211	1.1036	0.0839635	Ctrl	Mutant	46857	Mg-protoporphyrin IX chelatase OS=Dorcoceras hygrometricum OX=472368 GN=F511_01894 PE=3 SV=1	833.268	1231.45	957.256	856.978	1026.75	854.554	1363.59	536.857	1688.48	856.978	1340.62	673.821	1	1	2	0	2	0				x	x		x
A0A2Z7CW01_9LAMI	2	1	17.64	0.0704861	0.442016	1.50964	0.462633	Ctrl	Mutant	26308	Uncharacterized protein (Fragment) OS=Dorcoceras hygrometricum OX=472368 GN=F511_10479 PE=4 SV=1	633.885	475.299	786.904	375.615	474.98	405.392	1037.31	207.208	1388	375.615	620.181	319.654	1	0	0	0	0	0		x		x	x		x
A0A2Z7CX02_9LAMI	8	7	396.47	0.000188845	0.030014	1.20167	1	Ctrl	Mutant	25780	Proteasome subunit alpha type OS=Dorcoceras hygrometricum OX=472368 GN=F511_05925 PE=3 SV=1	5117.5	5243.18	5132.98	4373.38	4203.98	4316.06	8374.47	2285.78	9053.9	4373.38	5489.12	3403.24	6	4	8	5	7	5	x			x	x		x
A0A2Z7CXF4_9LAMI	7	3	310.52	0.789692	0.78744	1.03008	0.0557857	Ctrl	Mutant	44935	Phosphoribulokinase OS=Dorcoceras hygrometricum OX=472368 GN=F511_37412 PE=3 SV=1	2332.27	2918.1	2262.34	2370.74	2428.61	2493.95	3816.61	1272.15	3990.47	2370.74	3171.03	1966.5	3	4	4	5	5	5				x	x		x
A0A2Z7CXF8_9LAMI	5	4	126.16	0.0481755	0.430873	1.36654	0.567215	Ctrl	Mutant	36980	Phosphoglucomutase OS=Dorcoceras hygrometricum OX=472368 GN=F511_01817 PE=4 SV=1	8849.86	11737.3	8449.98	7445.03	6673.2	7130.38	14482.2	5116.94	14904.7	7445.03	8713.18	5622.35	1	2	2	2	3	3	x			x	x		x
A0A2Z7CY38_9LAMI	18	3	939.44	0.720081	0.78744	1.12701	0.0605438	Ctrl	Mutant	48719	Phosphoglycerate kinase OS=Dorcoceras hygrometricum OX=472368 GN=F511_05922 PE=3 SV=1	3487.2	6699.21	3919	4346.14	4302.49	3867.14	5706.59	2920.55	6912.61	4346.14	5617.76	3049.26	5	2	5	4	4	3				x	x		x
A0A2Z7CY76_9LAMI	5	2	68.64	0.357637	0.679851	1.41534	0.128	Ctrl	Mutant	15635	Uncharacterized protein (Fragment) OS=Dorcoceras hygrometricum OX=472368 GN=F511_11451 PE=3 SV=1	2570.24	5549.13	2655.68	2398.32	1967.63	3247.11	4206.04	2419.17	4684.28	2398.32	2569.13	2560.36	1	1	0	1	2	2				x	x		x
A0A2Z7CYD2_9LAMI	3	3	25.9	0.243667	0.637738	1.1807	0.185509	Ctrl	Mutant	17250	Metal ion binding protein (Fragment) OS=Dorcoceras hygrometricum OX=472368 GN=F511_07305 PE=4 SV=1	1594.77	1986.66	1489.07	1464.34	1213.25	1616.87	2609.74	866.09	2626.52	1464.34	1584.14	1274.91	2	1	2	1	1	3				x	x		x
A0A2Z7D0D7_9LAMI	3	2	50.8	0.0894679	0.478274	2.07946	0.400078	Ctrl	Mutant	11111	Ribosomal protein L37 OS=Dorcoceras hygrometricum OX=472368 GN=F511_14609 PE=3 SV=1	141.37	168.658	312.1	129.775	63.6774	105.725	231.343	73.5271	550.504	129.775	83.1434	83.3647	0	1	1	1	0	0		x	x	x	x		x
A0A2Z7D0E4_9LAMI	3	2	39.13	0.213722	0.630277	1.53939	0.208399	Ctrl	Mutant	12945	Uncharacterized protein OS=Dorcoceras hygrometricum OX=472368 GN=F511_10204 PE=3 SV=1	91.7964	75.4063	166.247	80.9174	58.1899	77.5039	150.219	32.8737	293.239	80.9174	75.9783	61.1123	2	0	1	1	0	0		x		x	x		x
A0A2Z7D0N7_9LAMI	5	3	27.03	0.677916	0.78744	1.08525	0.064265	Ctrl	Mutant	64864	Kinesin-like protein OS=Dorcoceras hygrometricum OX=472368 GN=F511_11485 PE=3 SV=1	929.828	1500.57	1202.86	1069.09	1064.68	1214.1	1521.61	654.179	2121.69	1069.09	1390.15	957.323	0	0	0	1	2	0				x	x		x
A0A2Z7D0S9_9LAMI	12	7	87.32	0.664689	0.78744	1.23754	0.0655777	Ctrl	Mutant	189352	Uncharacterized protein OS=Dorcoceras hygrometricum OX=472368 GN=F511_06880 PE=4 SV=1	9307.67	19392.1	7708.89	11604.1	8401.22	9414.76	15231.4	8454.05	13597.5	11604.1	10969.5	7423.59	1	2	1	2	1	1				x	x		x
A0A2Z7D0Z1_9LAMI	2	1	19.19	0.982665	0.811663	1.37581	0.0500379	Ctrl	Mutant	46141	Vegetative incompatibility protein HET-E-1 OS=Dorcoceras hygrometricum OX=472368 GN=F511_29278 PE=4 SV=1	29.2193	3.74546	23.674	11.8063	16.3743	12.987	47.8156	1.63285	41.7578	11.8063	21.3798	10.2403	0	0	1	0	0	0				x	x		x
A0A2Z7D1T7_9LAMI	3	1	45.1	0.0407254	0.42658	1.42271	0.613889	Ctrl	Mutant	36957	Uncharacterized protein OS=Dorcoceras hygrometricum OX=472368 GN=F511_10208 PE=4 SV=1	312.465	297.719	410.296	243.641	213.089	260.55	511.33	129.792	723.708	243.641	278.229	205.445	1	0	0	0	0	1	x			x	x		x
A0A2Z7D1W4_9LAMI	15	9	229.28	0.399165	0.695763	1.15495	0.11414	Ctrl	Mutant	33287	Uncharacterized protein OS=Dorcoceras hygrometricum OX=472368 GN=F511_21492 PE=3 SV=1	3025.91	4582.14	3147.79	3021.33	3049.08	3242.43	4951.71	1997.6	5552.29	3021.33	3981.17	2556.67	6	4	4	5	7	5				x	x		x
A0A2Z7D4R5_9LAMI	2	1	210.82	0.674629	0.78744	1.14386	0.0645845	Ctrl	Mutant	20072	Uncharacterized protein OS=Dorcoceras hygrometricum OX=472368 GN=F511_06481 PE=4 SV=1	4161.47	6973.99	3576.73	4251.17	3324.42	5286.3	6809.98	3040.34	6308.89	4251.17	4340.69	4168.28	3	2	3	2	2	2				x	x		x
A0A2Z7D5L2_9LAMI	6	2	47.73	0.403491	0.696778	1.18216	0.112843	Ctrl	Mutant	21525	Type II peroxiredoxin F OS=Dorcoceras hygrometricum OX=472368 GN=F511_34880 PE=4 SV=1	1387.34	2181.98	1404.66	1376.75	1293.39	1537.42	2270.29	951.241	2477.64	1376.75	1688.77	1212.26	1	0	2	0	1	1				x	x		x
A0A2Z7D5Q2_9LAMI	4	2	30.53	0.24831	0.637738	1.08375	0.18235	Ctrl	Mutant	68409	Mitogen-activated protein kinase kinase kinase 3 OS=Dorcoceras hygrometricum OX=472368 GN=F511_18955 PE=4 SV=1	522.548	547.538	582.66	562.555	479.995	482.469	855.117	238.701	1027.74	562.555	626.728	380.429	1	2	2	1	1	1				x	x		x
A0A2Z7D6J2_9LAMI	4	1	31.82	0.716583	0.78744	1.03463	0.0608269	Ctrl	Mutant	41036	Uncharacterized protein (Fragment) OS=Dorcoceras hygrometricum OX=472368 GN=F511_10157 PE=4 SV=1	1564.27	6000.32	345.971	4755.74	1720.83	1169.23	2559.83	2615.86	610.248	4755.74	2246.88	921.942	0	0	0	0	0	1				x	x		x
A0A2Z7D6M3_9LAMI	8	4	336.86	0.769824	0.78744	1.02381	0.0569804	Ctrl	Mutant	34088	Cysteine synthase OS=Dorcoceras hygrometricum OX=472368 GN=F511_13854 PE=3 SV=1	1631.3	1514.55	1448.66	1727.01	1501.55	1259.12	2669.52	660.274	2555.25	1727.01	1960.57	992.823	4	1	3	4	2	1				x	x		x
A0A2Z7D6U0_9LAMI	5	2	46.29	0.235092	0.637738	1.30911	0.1916	Ctrl	Mutant	24772	Uncharacterized protein OS=Dorcoceras hygrometricum OX=472368 GN=F511_19274 PE=4 SV=1	2366.21	3431.77	1936.75	2126.37	1810.67	1971.34	3872.15	1496.09	3416.17	2126.37	2364.19	1554.41	2	0	0	0	0	0				x	x		x
A0A2Z7D7A0_9LAMI	7	2	81.31	0.162348	0.584504	1.58673	0.261692	Ctrl	Mutant	56755	Uncharacterized protein OS=Dorcoceras hygrometricum OX=472368 GN=F511_09744 PE=4 SV=1	2823.08	5533.79	4226.34	1802.82	2842.2	3285.23	4619.79	2412.48	7454.71	1802.82	3711.06	2590.43	1	1	2	1	0	0		x		x	x		x
A0A2Z7D8D9_9LAMI	2	2	40.8	0.945225	0.802006	1.00713	0.0503797	Ctrl	Mutant	8489	Copper transport protein CCH-like OS=Dorcoceras hygrometricum OX=472368 GN=F511_06764 PE=4 SV=1	428.244	489.641	276.029	406.447	333.389	445.621	700.795	213.461	486.88	406.447	435.304	351.375	1	0	1	0	1	1				x	x		x
A0A2Z7D8R9_9LAMI	6	3	131.13	0.701641	0.78744	1.09718	0.0620874	Ctrl	Mutant	24644	Uncharacterized protein OS=Dorcoceras hygrometricum OX=472368 GN=F511_21508 PE=4 SV=1	6891.67	4150.18	4473.76	4088.6	5662.57	4390.16	11277.8	1809.29	7891.13	4088.6	7393.6	3461.66	0	1	3	0	0	0				x	x		x
A0A2Z7D9I4_9LAMI	5	1	88	0.255542	0.640593	3.48042	0.17761	Ctrl	Mutant	10543	Uncharacterized protein OS=Dorcoceras hygrometricum OX=472368 GN=F511_06088 PE=4 SV=1	37.5503	15.4053	139.256	9.74439	18.9498	26.5323	61.4487	6.71602	245.63	9.74439	24.7427	20.9209	0	0	1	0	0	0		x	x	x	x		x
A0A2Z7D9J2_9LAMI	2	2	19.41	0.398952	0.695763	1.73973	0.114205	Ctrl	Mutant	86040	Mannose-1-phosphate guanyltransferase alpha-like OS=Dorcoceras hygrometricum OX=472368 GN=F511_16148 PE=4 SV=1	1920.37	5208.44	1350.86	1704.11	1368.82	1801.22	3142.57	2270.64	2382.74	1704.11	1787.26	1420.27	1	0	0	1	0	2		x		x	x		x
A0A2Z7D9Q5_9LAMI	10	1	235.96	0.421391	0.705213	1.26226	0.107734	Ctrl	Mutant	15520	Histone H2B OS=Dorcoceras hygrometricum OX=472368 GN=F511_06786 PE=3 SV=1	1038.38	1718.11	874.887	1133.5	908.356	835.041	1699.25	749.016	1543.19	1133.5	1186.04	658.435	0	0	0	0	0	1				x	x		x
A0A2Z7D201_9LAMI	3	2	25.52	0.618474	0.78744	1.05475	0.0707682	Ctrl	Mutant	91286	Bifunctional aspartokinase/homoserine dehydrogenase 1, chloroplastic-like (Fragment) OS=Dorcoceras hygrometricum OX=472368 GN=F511_10470 PE=4 SV=1	641.293	840.704	693.795	666.131	742.679	654.035	1049.44	366.508	1223.76	666.131	969.714	515.711	2	2	2	2	3	1				x	x		x
A0A2Z7D279_9LAMI	16	10	864.74	0.958238	0.808551	1.00647	0.0502205	Ctrl	Mutant	42341	Phosphoglycerate kinase OS=Dorcoceras hygrometricum OX=472368 GN=F511_05923 PE=3 SV=1	10327	14877.3	10850.8	12001	12388.4	11434.1	16899.5	6485.83	19139.4	12001	16175.5	9015.83	12	7	15	12	17	9				x	x		x
A0A2Z7D280_9LAMI	16	2	733.31	0.0222466	0.356975	2.15285	0.772388	Ctrl	Mutant	43529	Fructose-bisphosphate aldolase OS=Dorcoceras hygrometricum OX=472368 GN=F511_06497 PE=3 SV=1	6719.14	9401.73	5019.44	3206	2765.36	3848.33	10995.5	4098.72	8853.63	3206	3610.72	3034.43	3	0	1	0	1	0	x	x	x	x	x		x
A0A2Z7D372_9LAMI	8	6	316.86	0.692384	0.78744	1.10643	0.0629107	Ctrl	Mutant	22992	Photosystem I reaction center subunit II, chloroplastic-like OS=Dorcoceras hygrometricum OX=472368 GN=F511_27501 PE=4 SV=1	32903.2	52759.2	31106.5	34245.2	32877.3	38414.4	53844	23000.5	54867.8	34245.2	42927.8	30290	8	9	7	10	6	9				x	x		x
A0A2Z7D470_9LAMI	6	4	46.95	0.364606	0.680946	1.24469	0.125481	Ctrl	Mutant	46361	Uncharacterized protein OS=Dorcoceras hygrometricum OX=472368 GN=F511_24992 PE=4 SV=1	1210.52	2147.55	1399.77	1370.41	1074.28	1377.8	1980.94	936.23	2469.01	1370.41	1402.68	1086.41	0	2	1	1	1	1				x	x		x
A0A2Z7D498_9LAMI	9	5	267.89	0.355886	0.679082	1.1489	0.128646	Ctrl	Mutant	65616	Polyphenol oxidase, chloroplastic-like OS=Dorcoceras hygrometricum OX=472368 GN=F511_09757 PE=4 SV=1	12031.2	17950.5	13549.1	16991.4	14391.3	12506.5	19688.3	7825.59	23898.9	12991.4	16179.3	9861.47	4	3	4	3	4	3				x	x		x
A0A2Z7D870_9LAMI	4	1	34.12	0.396131	0.695763	1.13266	0.115066	Ctrl	Mutant	46270	Stomatin-like protein 2, mitochondrial OS=Dorcoceras hygrometricum OX=472368 GN=F511_41938 PE=4 SV=1	369.704	529.554	448.859	346.732	403.751	439.736	604.997	230.861	791.729	346.732	527.177	346.734	0	0	1	1	0	0				x	x		x
A0A2Z7DA56_9LAMI	4	3	92.75	0.77856	0.78744	1.29423	0.0564396	Ctrl	Mutant	31437	Uncharacterized protein OS=Dorcoceras hygrometricum OX=472368 GN=F511_08370 PE=4 SV=1	14313.8	44271.6	13826.7	20826.9	13187.7	21935.5	23423.7	19300.3	24388.4	20826.9	17219.1	17296.3	2	1	2	1	1	2				x	x		x
A0A2Z7DB88_9LAMI	3	1	68.14	0.0751926	0.450915	2.64707	0.445369	Ctrl	Mutant	33879	Enolase OS=Dorcoceras hygrometricum OX=472368 GN=F511_22348 PE=4 SV=1	1231.83	2344.86	779.732	575.018	353.102	717.632	2015.8	1022.25	1375.35	575.018	461.044	565.857	1	0	0	0	0	0		x	x	x	x		x
A0A2Z7DBB3_9LAMI	3	2	20.43	0.449681	0.729514	1.0951	0.100429	Ctrl	Mutant	53058	Uncharacterized protein (Fragment) OS=Dorcoceras hygrometricum OX=472368 GN=F511_16146 PE=4 SV=1	303.072	388.017	292.915	304.274	271.695	322.585	495.958	169.158	516.664	304.274	354.751	254.36	0	0	0	0	1	1				x	x		x
A0A2Z7DBG9_9LAMI	10	6	485.55	0.757711	0.78744	1.37139	0.057771	Ctrl	Mutant	32627	Chlorophyll a-b binding protein, chloroplastic OS=Dorcoceras hygrometricum OX=472368 GN=F511_05995 PE=3 SV=1	9789.7	32131.3	9034.25	12303.6	11430.9	13421.3	16020.2	14007.7	15935.2	12303.6	14925.2	10582.8	10	7	11	8	11	10				x	x		x
A0A2Z7DBI7_9LAMI	2	1	135.29	0.38862	0.695151	1.76342	0.117411	Ctrl	Mutant	17022	Uncharacterized protein (Fragment) OS=Dorcoceras hygrometricum OX=472368 GN=F511_42868 PE=4 SV=1	3414.49	13242.4	4818.93	3745.55	3878.48	4554.46	5587.61	5773.07	8499.97	3745.55	5064.12	3591.22	1	1	3	2	2	2		x		x	x		x
A0A2Z7DBL6_9LAMI	5	4	93.52	0.818131	0.78744	1.06249	0.0542877	Ctrl	Mutant	29235	Putative ribose-5-phosphate isomerase 3, chloroplastic OS=Dorcoceras hygrometricum OX=472368 GN=F511_09736 PE=3 SV=1	2369.1	3624.18	2204.87	3030.45	2188.34	2497.21	3876.88	1579.97	3889.11	3030.45	2857.31	1969.07	2	0	2	0	2	2				x	x		x
A0A2Z7DBM3_9LAMI	4	1	150.24	0.207712	0.620363	1.3851	0.213596	Ctrl	Mutant	7197	GA family protein OS=Dorcoceras hygrometricum OX=472368 GN=F511_41937 PE=4 SV=1	5299.45	8711.05	6639.42	3690.4	4598.55	6619.62	8672.21	3797.61	11711.1	3690.4	6004.31	5219.61	0	0	0	0	0	1				x	x		x
A0A2Z7DBP3_9LAMI	5	3	42.06	0.337482	0.662307	1.28142	0.135787	Ctrl	Mutant	45646	Uncharacterized protein OS=Dorcoceras hygrometricum OX=472368 GN=F511_06082 PE=4 SV=1	3041.14	5263.37	3126.16	2715.58	2576.13	3628.58	4976.64	2294.58	5514.14	2715.58	3363.65	2861.16	4	3	2	1	2	2				x	x		x
A0A2Z7DC00_9LAMI	16	4	93.35	0.250151	0.637738	1.60428	0.181122	Ctrl	Mutant	117287	Uncharacterized protein OS=Dorcoceras hygrometricum OX=472368 GN=F511_01359 PE=3 SV=1	4880.13	13093.5	9513.18	6184.43	5773.56	5175.46	7986.02	5708.17	16780	6184.43	7538.52	4080.88	0	2	3	2	3	2		x		x	x		x
A0A2Z7DC02_9LAMI	2	1	75.1	0.48305	0.750825	1.43536	0.0928629	Ctrl	Mutant	15867	Actin-depolymerizing factor 1-like OS=Dorcoceras hygrometricum OX=472368 GN=F511_40055 PE=3 SV=1	1975.34	5254.95	2006.85	1690.63	1381.72	3363.07	3232.52	2290.92	3539.82	1690.63	1804.11	2651.8	0	1	0	0	0	0				x	x		x
A0A2Z7DC37_9LAMI	18	9	885.49	0.294259	0.654563	1.55651	0.155468	Ctrl	Mutant	47177	Ribulose bisphosphate carboxylase/oxygenase activase, chloroplastic OS=Dorcoceras hygrometricum OX=472368 GN=F511_38143 PE=4 SV=1	16226.2	33328.2	12670.7	13824.5	14475.3	11677.6	26553.2	14529.5	22349.5	13824.5	18900.4	9207.85	12	7	10	9	13	5		x		x	x		x
A0A2Z7DDV8_9LAMI	5	2	61.52	0.475533	0.748617	1.23187	0.0944772	Ctrl	Mutant	16599	Uncharacterized protein OS=Dorcoceras hygrometricum OX=472368 GN=F511_08174 PE=4 SV=1	1680.33	2807.34	1414.57	1775.84	1498.15	1517.31	2749.76	1223.87	2495.12	1775.84	1956.13	1196.41	3	2	1	3	1	1				x	x		x
A0A2Z7DE08_9LAMI	7	2	94.89	0.916157	0.802006	1.03849	0.0508925	Ctrl	Mutant	36404	ACT domain-containing protein isoform 1 OS=Dorcoceras hygrometricum OX=472368 GN=F511_06758 PE=4 SV=1	939.981	1250.22	647.679	934.045	654.846	1143.81	1538.22	545.036	1142.42	934.045	855.03	901.903	0	0	1	1	1	1				x	x		x
A0A2Z7DE78_9LAMI	8	4	341.26	0.635169	0.78744	1.11452	0.0687798	Ctrl	Mutant	26866	20 kDa chaperonin, chloroplastic OS=Dorcoceras hygrometricum OX=472368 GN=F511_36810 PE=3 SV=1	5392.55	9012.25	5842.73	6190.86	5868.34	6107.77	8824.56	3928.92	10305.8	6190.86	7662.27	4816.01	2	3	3	2	2	3				x	x		x
A0A2Z7DF37_9LAMI	7	4	60.1	0.49633	0.759147	1.10448	0.0901298	Ctrl	Mutant	70075	Malic enzyme OS=Dorcoceras hygrometricum OX=472368 GN=F511_12111 PE=3 SV=1	2088.67	2606.54	2095.96	1859.94	1694.18	2594.64	3417.97	1136.33	3697	1859.94	2212.09	2045.89	0	0	2	1	2	0				x	x		x
A0A2Z7DF60_9LAMI	6	3	63.52	0.923551	0.802006	1.09425	0.0507413	Ctrl	Mutant	109456	Aconitate hydratase OS=Dorcoceras hygrometricum OX=472368 GN=F511_23759 PE=3 SV=1	10082.7	20418.8	8957.07	12608.2	10008	13443.7	16499.7	8901.63	15799.1	12608.2	13067.5	10600.4	3	2	1	2	1	0				x	x		x
A0A2Z7DFR0_9LAMI	10	4	65.82	0.761166	0.78744	1.03331	0.0575406	Ctrl	Mutant	68854	Lysosomal beta glucosidase-like OS=Dorcoceras hygrometricum OX=472368 GN=F511_36807 PE=4 SV=1	1847.54	2246.62	1747.41	2063.25	1800	1790.01	3023.39	979.421	3082.2	2063.25	2350.26	1411.43	3	0	0	0	2	0				x	x		x
A0A2Z7DH27_9LAMI	3	2	26.32	0.169238	0.584504	1.32902	0.25318	Ctrl	Mutant	36428	ATP-dependent Clp protease proteolytic subunit OS=Dorcoceras hygrometricum OX=472368 GN=F511_27943 PE=3 SV=1	2214.25	3247.72	2027.94	1835.66	1680.19	2119.81	3623.49	1415.86	3577.02	1835.66	2193.82	1671.48	0	0	2	1	1	0				x	x		x
A0A2Z7DH79_9LAMI	2	1	33.88	0.282135	0.649475	1.20209	0.161872	Ctrl	Mutant	26696	Uncharacterized protein OS=Dorcoceras hygrometricum OX=472368 GN=F511_08173 PE=4 SV=1	124.209	186.287	143.179	132.684	137.266	107.455	203.26	81.2125	252.55	132.684	179.228	84.7292	1	1	1	1	1	1				x	x		x
A0A2Z7DI00_9LAMI	4	4	53	0.0288158	0.409595	1.50288	0.707463	Ctrl	Mutant	22098	Uncharacterized protein OS=Dorcoceras hygrometricum OX=472368 GN=F511_05952 PE=3 SV=1	1501.44	1974.67	1427.29	1145	1166.55	951.116	2457.01	860.863	2517.55	1145	1523.16	749.96	1	1	2	2	3	2	x	x		x	x		x
A0A2Z7DIY5_9LAMI	23	6	925.3	0.998256	0.812869	1.01669	0.0500004	Ctrl	Mutant	42862	Fructose-bisphosphate aldolase OS=Dorcoceras hygrometricum OX=472368 GN=F511_20457 PE=3 SV=1	9763.59	15498.6	10682.7	11811.1	10407.1	13136.7	15977.5	6756.65	18842.9	11811.1	13588.5	10358.3	5	5	1	5	8	3				x	x		x
A0A2Z7DL41_9LAMI	5	2	43.95	0.668439	0.78744	1.08359	0.0651982	Ctrl	Mutant	70892	Rhodanese/cell cycle control phosphatase superfamily protein isoform 1 OS=Dorcoceras hygrometricum OX=472368 GN=F511_18661 PE=4 SV=1	605.029	797.028	502.441	585.878	605.873	565.833	990.092	347.467	886.241	585.878	791.087	446.163	0	0	1	1	2	0				x	x		x
A0A291F701_9LAMI	3	3	58.56	0.0569631	0.438004	1.14013	0.520731	Ctrl	Mutant	8532	Photosystem II reaction center protein H OS=Primulina brachytricha var. magnibracteata OX=2041141 GN=psbH PE=3 SV=1	1424.62	1372.5	1285.7	1167.44	1126.79	1286.78	2331.3	598.348	2267.81	1167.44	1471.25	1014.64	1	1	2	2	0	0				x	x		x
A4GTA4_9LAMI	3	1	111.68	0.76889	0.78744	1.03215	0.0570396	Ctrl	Mutant	21281	Actin-1 (Fragment) OS=Sinningia speciosa OX=121486 PE=3 SV=1	457.372	350.85	411.525	386.633	425.29	369.826	748.46	152.954	725.877	386.633	555.3	291.61	0	1	1	1	1	0				x	x		x
E3W760_9LAMI	6	3	38.96	0.926389	0.802006	1.14156	0.0506871	Ctrl	Mutant	57596	Flavonoid 3',5'-hydroxylase OS=[Saintpaulia] hybrid cultivar OX=911500 GN=F3'5'H PE=2 SV=1	2784.81	9245.16	2506.73	3961.2	3538.11	5234.72	4557.17	4030.46	4421.55	3961.2	4619.7	4127.61	2	2	3	4	3	3				x	x		x
F1CYZ3_9LAMI	13	9	589.03	0.937069	0.802006	1.0378	0.0505016	Ctrl	Mutant	24163	Superoxide dismutase OS=Haberlea rhodopensis OX=121482 GN=MSD PE=2 SV=1	27990.4	52185	20423.7	36333.3	24666.7	35934.5	45804.5	22750.2	36024.7	36333.3	32207.2	28334.5	11	8	10	10	11	8				x	x		x
F1CZQ3_9LAMI;A2IBH1_9LAMI;A0A2Z7AU94_9LAMI	9	4	315.67	0.744216	0.78744	1.10523	0.0587091	Ctrl	Mutant	34500	Fe-superoxide dismutase OS=Haberlea rhodopensis OX=121482 GN=FSD PE=2 SV=1	3779.01	7044.16	4284.96	4187.4	3629.74	5852.48	6184.1	3070.93	7558.11	4187.4	4739.35	4614.72	2	1	4	2	4	3				x	x		x
F1CZQ4_9LAMI	5	2	202.9	0.704808	0.78744	1.08181	0.0618132	Ctrl	Mutant	22757	Superoxide dismutase [Cu-Zn] OS=Haberlea rhodopensis OX=121482 GN=CSD5 PE=2 SV=1	854.558	1208.15	769.786	1016.48	697.819	903.983	1398.43	526.695	1357.8	1016.48	911.141	712.795	0	0	1	1	0	0				x	x		x
F1CZQ5_9LAMI;A0A2Z7D105_9LAMI;A2IBH0_9LAMI	6	5	204.75	0.908333	0.799294	1.07745	0.051068	Ctrl	Mutant	15394	Superoxide dismutase [Cu-Zn] OS=Haberlea rhodopensis OX=121482 GN=CSD2 PE=2 SV=1	4128.05	7630.09	3534.18	4834.69	3663.94	5694.44	6755.29	3326.37	6233.84	4834.69	4783.99	4490.1	8	5	4	8	8	7				x	x		x
G9FCL9_9LAMI	4	1	58.44	0.255968	0.640593	1.4477	0.177337	Ctrl	Mutant	22691	ATPase subunit 4 OS=Dorcoceras hygrometricum OX=472368 GN=atp4 PE=4 SV=1	49.3604	33.6863	53.7051	17.7936	50.1924	26.4757	80.7753	14.6856	94.7289	17.7936	65.536	20.8762	1	0	1	0	1	0				x	x		x
I3NTL2_9LAMI	28	1	1451.33	0.278574	0.649475	1.09507	0.163838	Ctrl	Mutant	51698	Ribulose bisphosphate carboxylase large chain (Fragment) OS=Nematanthus hirsutus OX=39408 GN=rbcL PE=3 SV=1	796.736	996.335	881.137	774.367	821.484	846.182	1303.81	434.356	1554.21	774.367	1072.61	667.219	0	0	0	1	1	1				x	x		x
K9R4E5_9LAMI	5	3	35.66	0.642521	0.78744	1.06499	0.0679458	Ctrl	Mutant	13170	Ribosomal protein L2 (Fragment) OS=Cyrtandra sp. Kului 2 OX=1263893 GN=RPL2 PE=4 SV=1	840.868	1028.43	740.741	767.589	755.588	927.595	1376.03	448.348	1306.57	767.589	986.569	731.414	1	0	2	0	0	0				x	x		x
Q9SP21_9LAMI	7	5	88.82	0.802202	0.78744	1.16804	0.0550966	Ctrl	Mutant	29210	Bdn1 (Fragment) OS=Paraboea crassifolia OX=104990 GN=bdn1 PE=2 SV=2	21079.9	46692.4	19147.9	24977.2	20496.2	28942.2	34495.9	20355.7	33774.5	24977.2	26761.8	22821.1	7	3	6	5	8	5				x	x		x
Q9TKG9_9LAMI	26	3	1228.29	0.742982	0.78744	1.07561	0.058798	Ctrl	Mutant	52772	Ribulose bisphosphate carboxylase large chain (Fragment) OS=Rhytidophyllum tomentosum OX=49025 PE=3 SV=1	1251.19	1656.32	968.841	1326.28	735.318	1542.28	2047.5	722.078	1708.91	1326.28	960.102	1216.1	2	0	0	1	0	0				x	x		x
Q9TKH1_9LAMI	23	1	1070.24	0.767866	0.78744	1.22939	0.0571049	Ctrl	Mutant	52179	Ribulose bisphosphate carboxylase large chain (Fragment) OS=Ornithoboea wildeana OX=48771 PE=3 SV=1	230.515	488.655	150.805	329.475	172.694	205.477	377.223	213.031	266	329.475	225.486	162.02	1	0	0	1	0	0				x	x		x
Q9TKH4_9LAMI	24	1	1060.73	0.879375	0.78744	1.10985	0.0518584	Ctrl	Mutant	52845	Ribulose bisphosphate carboxylase large chain (Fragment) OS=Monophyllaea hirticalyx OX=48775 PE=3 SV=1	400.772	73.463	2576.37	83.9961	1226.11	1438.54	655.837	32.0264	4544.38	83.9961	1600.93	1134.3	0	0	2	0	1	0				x	x		x
R4MSI5_9LAMI	3	1	163.1	0.68888	0.78744	1.11854	0.063231	Ctrl	Mutant	6473	Cytosol O-acetylserine(Thiol)lyase (Fragment) OS=Cyrtandra paludosa var. paludosa OX=1263652 PE=4 SV=1	792.939	1267.93	702.416	765.047	654.303	1051.1	1297.59	552.76	1238.97	765.047	854.321	828.798	1	0	0	1	1	1				x	x		x
A0A0B4VMM7_9LAMI	14	7	88.8	0.527722	0.773211	1.0901	0.0842234	Mutant	Ctrl	45023	Maturase K (Fragment) OS=Primulina lijiangensis OX=1269182 GN=matK PE=3 SV=1	5331.86	7507.62	4713.96	6245	5848.99	7041.1	8725.26	3272.97	8314.81	6245	7637.02	5551.95	6	3	5	2	5	3				x	x	x
A0A0S2LS20_9LAMI	9	1	364.64	0.702616	0.78744	1.03273	0.0620026	Mutant	Ctrl	10015	Ribulose-1,5-bisphosphate carboxylase/oxygenase large subunit (Fragment) OS=Codonanthe serrulata OX=188993 GN=rbcL PE=4 SV=1	118.482	26.393	209.049	68.9042	130.307	166.298	193.888	11.5061	368.734	68.9042	170.141	131.127	0	0	1	0	0	0				x	x	x
A0A1C9HCJ4_9LAMI;A0A1C9HCK1_9LAMI	27	1	1977.83	0.713977	0.78744	1.06337	0.0610408	Mutant	Ctrl	39453	ATP synthase subunit beta (Fragment) OS=Allostigma guangxiense OX=1032913 GN=atpB PE=4 SV=1	624.515	718.913	475.304	678.642	740.11	515.232	1021.98	313.413	838.374	678.642	966.36	406.263	0	0	0	0	1	0				x	x	x
A0A1C9HGC5_9LAMI	28	1	1323.02	0.31766	0.656465	1.22351	0.144257	Mutant	Ctrl	48263	Ribulose bisphosphate carboxylase large chain (Fragment) OS=Whytockia sasakii OX=199108 GN=rbcL PE=3 SV=1	4566	7566.65	3776.84	6869.8	5842.95	6752.65	7471.98	3298.71	6661.85	6869.8	7629.13	5324.5	0	0	0	2	0	0				x	x	x
A0A1C9HGH2_9LAMI	29	1	1544.33	0.991611	0.811663	1.01346	0.0500089	Mutant	Ctrl	48380	Ribulose bisphosphate carboxylase large chain (Fragment) OS=Primulina bipinnatifida OX=405726 GN=rbcL PE=3 SV=1	715.782	910.904	745.432	984.267	622.587	797.19	1171.33	397.112	1314.85	984.267	812.91	628.589	0	0	1	1	0	0				x	x	x
A0A1D9CSC5_9LAMI;A0A2L1DEQ8_9LAMI;A0A2Z7B1F8_9LAMI	7	3	197.7	0.779048	0.78744	1.02533	0.0564101	Mutant	Ctrl	83134	Photosystem I P700 chlorophyll a apoprotein A1 OS=Haberlea rhodopensis OX=121482 GN=psaA PE=3 SV=1	6114.25	10434.1	6165.91	7629.4	7148.64	8511.51	10005.6	4548.78	10875.9	7629.4	9333.96	6711.37	4	3	4	4	3	4				x	x	x
A0A1D9CSD0_9LAMI;A0A1W5T1L8_9LAMI;A0A291F762_9LAMI;A0A291F7C3_9LAMI;A0A2H4NSP0_9LAMI;A0A2Z7DFM6_9LAMI	32	6	1830.73	0.667221	0.78744	1.16264	0.0653208	Mutant	Ctrl	55377	ATP synthase subunit alpha, chloroplastic OS=Haberlea rhodopensis OX=121482 GN=atpA PE=3 SV=1	11650.2	14951.2	13482.8	11968.1	22812.5	11822.9	19064.8	6518.04	23781.9	11968.1	29786.2	9322.46	4	3	7	2	5	2				x	x	x
A0A1D9CSD5_9LAMI;A0A1W5T2X3_9LAMI;A0A2Z7DAW1_9LAMI;Q8HTV3_9LAMI	12	10	841.35	0.768267	0.78744	1.02761	0.0570793	Mutant	Ctrl	52048	Photosystem II CP43 reaction center protein OS=Haberlea rhodopensis OX=121482 GN=psbC PE=3 SV=1	22227.5	32709.1	20658.3	25184.7	27965.8	24531.4	36373.9	14259.7	36438.5	25184.7	36514.8	19343.1	12	12	16	13	14	13				x	x	x
A0A1D9CSD7_9LAMI;A0A291F7B8_9LAMI;A0A2L1DER1_9LAMI	11	6	363.86	0.310813	0.654563	1.42123	0.147392	Mutant	Ctrl	82425	Photosystem I P700 chlorophyll a apoprotein A2 OS=Haberlea rhodopensis OX=121482 GN=psaB PE=3 SV=1	15117.3	51636.6	14852.6	37372.5	28950.3	49658.7	24738.5	22511.1	26198.1	37372.5	37800.3	39156.2	7	4	9	5	7	2				x	x	x
A0A1D9CSE3_9LAMI;A0A291F6U8_9LAMI	13	3	677.28	0.254444	0.640593	1.41057	0.178315	Mutant	Ctrl	35277	Cytochrome f OS=Haberlea rhodopensis OX=121482 GN=petA PE=3 SV=1	1328.92	3755.16	1284.83	3296.69	2703.1	2984.01	2174.7	1637.08	2266.27	3296.69	3529.43	2352.91	1	0	5	2	2	2				x	x	x
A0A1D9CSE7_9LAMI;A0A1W5T1P6_9LAMI	7	4	297.83	0.736983	0.78744	1.03093	0.0592376	Mutant	Ctrl	39796	Photosystem II D2 protein OS=Haberlea rhodopensis OX=121482 GN=psbD PE=3 SV=1	6130.23	8625.37	5649.52	7263.06	7036.6	6736.6	10031.7	3760.26	9965.02	7263.06	9187.67	5311.85	4	5	4	4	5	5				x	x	x
A0A1D9CSF1_9LAMI	4	1	51.15	0.0661782	0.438004	1.68533	0.479661	Mutant	Ctrl	15678	30S ribosomal protein S8, chloroplastic OS=Haberlea rhodopensis OX=121482 GN=rps8 PE=3 SV=1	199.929	112.171	234.559	290.135	323.774	307.392	327.171	48.9014	413.731	290.135	422.751	242.38	2	0	1	1	0	1		x		x	x	x
A0A1D9CSF4_9LAMI;A0A1W5T1Q5_9LAMI;G9FCE9_9LAMI	6	2	134.89	0.734634	0.78744	1.03082	0.059413	Mutant	Ctrl	23530	30S ribosomal protein S4, chloroplastic OS=Haberlea rhodopensis OX=121482 GN=rps4 PE=3 SV=1	487.935	622.081	446.804	553.268	493.237	558.293	798.475	271.198	788.103	553.268	644.018	440.218	1	1	0	1	1	1				x	x	x
A0A1D9CSG5_9LAMI;A0A1W5T1N7_9LAMI	8	5	130.6	0.0437874	0.42658	1.1888	0.59378	Mutant	Ctrl	25545	30S ribosomal protein S3, chloroplastic OS=Haberlea rhodopensis OX=121482 GN=rps3 PE=3 SV=1	554.809	604.454	642.457	659.072	723.257	759.559	907.91	263.514	1133.21	659.072	944.354	598.916	3	2	2	3	4	2	x			x	x	x
A0A1D9CSK7_9LAMI;A0A1W5T4T7_9LAMI;A0A2H4NS52_9LAMI	4	1	96.83	0.848664	0.78744	1.00737	0.0529447	Mutant	Ctrl	23428	ATP synthase subunit b, chloroplastic OS=Haberlea rhodopensis OX=121482 GN=atpF PE=3 SV=1	1819.91	2931.25	1848.58	2227.53	2113.68	2307.16	2978.16	1277.89	3260.65	2227.53	2759.82	1819.21	1	2	1	2	2	2				x	x	x
A0A1W5T1R0_9LAMI	4	2	25.43	0.0681727	0.442016	1.20104	0.471622	Mutant	Ctrl	15765	30S ribosomal protein S8, chloroplastic OS=Lysionotus pauciflorus OX=48809 GN=rps8 PE=3 SV=1	1693.98	1866.73	1557.59	2142.11	2163.75	1841.44	2772.09	813.806	2747.38	2142.11	2825.2	1451.99	0	1	0	1	0	0				x	x	x
A0A1W5T4V7_9LAMI	2	1	69.41	0.293202	0.654563	1.57916	0.156009	Mutant	Ctrl	18172	Cytochrome b6 OS=Lysionotus pauciflorus OX=48809 GN=petB PE=3 SV=1	38.7448	5.94859	25.9637	40.4073	42.2334	28.9383	63.4035	2.59331	45.7967	40.4073	55.144	22.818	1	0	0	0	0	0		x		x	x	x
A0A2L1DEN9_9LAMI	3	1	45.78	0.668487	0.78744	1.06057	0.0651933	Mutant	Ctrl	23280	ATP synthase subunit b, chloroplastic OS=Streptocarpus teitensis OX=86148 GN=atpF PE=3 SV=1	431.069	307.011	507.616	429.271	497.981	393.89	705.418	133.842	895.369	429.271	650.213	310.585	1	0	0	0	0	0				x	x	x
A0A2Z6ZRC7_9LAMI	2	2	62.49	0.589134	0.78744	1.13812	0.074601	Mutant	Ctrl	8304	MLP-like protein 34-like OS=Dorcoceras hygrometricum OX=472368 GN=F511_47714 PE=4 SV=1	2141.06	3498.83	2048.79	3135.4	2093.91	3521.37	3503.71	1525.33	3613.81	3135.4	2734.01	2776.62	2	2	1	2	2	3				x	x	x
A0A2Z6ZSW0_9LAMI	2	1	31.24	0.848187	0.78744	1.04129	0.0529636	Mutant	Ctrl	13164	Protein N-terminal asparagine amidohydrolase OS=Dorcoceras hygrometricum OX=472368 GN=F511_46703 PE=4 SV=1	779.081	1082.2	487.658	1003.41	892.089	550.422	1274.92	471.791	860.166	1003.41	1164.8	434.011	0	0	1	0	1	0				x	x	x
A0A2Z6ZVN2_9LAMI	2	2	103.17	0.0666351	0.438004	1.98553	0.477795	Mutant	Ctrl	15158	Uncharacterized protein OS=Dorcoceras hygrometricum OX=472368 GN=F511_45540 PE=4 SV=1	202.841	224.668	91.4297	359.303	283.177	387.887	331.937	97.9447	161.27	359.303	369.744	305.851	1	0	1	1	2	1		x		x	x	x
A0A2Z6ZYU9_9LAMI	5	1	42.78	8.88677e-05	0.0242419	1.99348	1	Mutant	Ctrl	118260	Putative LRR receptor-like serine/threonine-protein kinase OS=Dorcoceras hygrometricum OX=472368 GN=F511_43370 PE=3 SV=1	368.256	325.117	368.855	716.035	710.471	691.018	602.628	141.736	650.612	716.035	927.66	544.872	1	0	0	0	0	1	x	x		x	x	x
A0A2Z6ZZ52_9LAMI	3	2	91.62	0.583919	0.78744	1.08599	0.0753302	Mutant	Ctrl	63651	Pectinesterase OS=Dorcoceras hygrometricum OX=472368 GN=F511_43063 PE=3 SV=1	1477.09	2196.77	1139.64	1856.54	1788.19	1582.7	2417.16	957.69	2010.18	1856.54	2334.83	1247.97	0	1	1	3	3	1				x	x	x
A0A2Z6ZZU0_9LAMI	12	4	63.27	0.215445	0.630946	1.17509	0.20695	Mutant	Ctrl	159938	Inosine-5'-monophosphate dehydrogenase OS=Dorcoceras hygrometricum OX=472368 GN=F511_08508 PE=3 SV=1	1443.55	1992.25	1402.99	1852.16	1806.4	2027.45	2362.27	868.531	2474.69	1852.16	2358.61	1598.66	1	0	1	2	1	0				x	x	x
A0A2Z7A0L9_9LAMI	3	3	106.69	0.570395	0.78386	1.08967	0.0772931	Mutant	Ctrl	39458	Glutamine synthetase OS=Dorcoceras hygrometricum OX=472368 GN=F511_39523 PE=3 SV=1	7510.59	12875.3	7124.6	10418.9	9004.23	10554.3	12290.6	5613.03	12566.9	10418.9	11756.8	8322.12	4	2	4	2	4	0				x	x	x
A0A2Z7A1A1_9LAMI	2	1	26.94	0.942148	0.802006	1.13811	0.0504237	Mutant	Ctrl	29873	Uncharacterized protein OS=Dorcoceras hygrometricum OX=472368 GN=F511_09362 PE=4 SV=1	51.0505	60.7863	58.273	45.7676	30.7569	117.079	83.5409	26.5	102.786	45.7676	40.1592	92.3177	0	0	1	0	0	0				x	x	x
A0A2Z7A1U7_9LAMI	5	1	119.48	0.146845	0.576414	1.41409	0.282895	Mutant	Ctrl	36255	Glyceraldehyde-3-phosphate dehydrogenase OS=Dorcoceras hygrometricum OX=472368 GN=F511_09369 PE=3 SV=1	1392.69	2257.92	1070.76	2240.56	2306.84	2129.05	2279.05	984.35	1888.68	2240.56	3012.03	1678.77	0	0	0	1	1	1				x	x	x
A0A2Z7A1Z4_9LAMI	6	5	90.79	0.313259	0.654563	1.20276	0.146259	Mutant	Ctrl	16326	Uncharacterized protein OS=Dorcoceras hygrometricum OX=472368 GN=F511_34648 PE=3 SV=1	3737.49	5535.65	3464.44	5085.07	4310.08	5925.09	6116.16	2413.29	6110.82	5085.07	5627.66	4671.97	4	4	3	5	3	2				x	x	x
A0A2Z7A4T8_9LAMI	6	2	322.58	0.541387	0.773211	1.08257	0.0818751	Mutant	Ctrl	27465	Photosystem II 22 kDa protein, chloroplastic OS=Dorcoceras hygrometricum OX=472368 GN=F511_11386 PE=4 SV=1	5227.35	7487.36	5103.74	6290	5840.09	7159.58	8554.23	3264.14	9002.33	6290	7625.39	5645.37	4	3	5	4	4	4				x	x	x
A0A2Z7A4Z1_9LAMI	4	2	119.97	0.0309014	0.409595	1.56353	0.689037	Mutant	Ctrl	40828	Putative carboxylesterase 8-like OS=Dorcoceras hygrometricum OX=472368 GN=F511_25992 PE=4 SV=1	2840.08	3745.94	3480.06	4290.12	5232.11	6216.42	4647.61	1633.06	6138.38	4290.12	6831.55	4901.68	5	4	5	6	7	5	x	x		x	x	x
A0A2Z7A5H0_9LAMI	10	8	373.2	0.828471	0.78744	1.01096	0.0538028	Mutant	Ctrl	41224	Uncharacterized protein OS=Dorcoceras hygrometricum OX=472368 GN=F511_44237 PE=3 SV=1	13379.4	20659.9	12609.4	15448.7	15754.3	15956.9	21894.5	9006.78	22241.4	15448.7	20570.3	12582.1	10	10	10	12	11	11				x	x	x
A0A2Z7A5M2_9LAMI;A0A2Z7AH72_9LAMI	8	5	126.77	0.987699	0.811663	1.01001	0.0500191	Mutant	Ctrl	46012	Putative L-ascorbate peroxidase 6, chloroplastic OS=Dorcoceras hygrometricum OX=472368 GN=F511_11383 PE=3 SV=1	6384.14	7293.77	3609	6372.29	7531.76	3555.9	10447.2	3179.75	6365.81	6372.29	9834.19	2803.85	4	2	2	5	5	3				x	x	x
A0A2Z7A5P9_9LAMI	5	1	45.01	0.043441	0.42658	1.78395	0.595987	Mutant	Ctrl	55115	Pectinesterase OS=Dorcoceras hygrometricum OX=472368 GN=F511_44371 PE=3 SV=1	346.807	322.03	543.014	559.554	828.777	773.555	567.527	140.39	957.806	559.554	1082.13	609.952	1	0	0	0	0	0	x	x		x	x	x
A0A2Z7A6R5_9LAMI	7	3	184.43	0.523008	0.773211	1.0955	0.0850635	Mutant	Ctrl	74006	Luminal-binding protein 5-like OS=Dorcoceras hygrometricum OX=472368 GN=F511_04008 PE=3 SV=1	5092.89	8099.94	4737.5	6308.67	6357.1	6976.83	8334.2	3531.2	8356.33	6308.67	8300.45	5501.27	4	3	2	3	1	1				x	x	x
A0A2Z7A6W6_9LAMI	4	1	54.82	0.0725593	0.449846	1.23869	0.454865	Mutant	Ctrl	41625	P-loop containing nucleoside triphosphate hydrolases superfamily protein isoform 1 OS=Dorcoceras hygrometricum OX=472368 GN=F511_04017 PE=3 SV=1	447.393	566.743	540.936	710.986	605.019	610.255	732.131	247.073	954.141	710.986	789.972	481.19	0	0	0	1	1	1				x	x	x
A0A2Z7A7B4_9LAMI	5	3	126.26	0.260945	0.647111	1.0703	0.174205	Mutant	Ctrl	24378	Uncharacterized protein OS=Dorcoceras hygrometricum OX=472368 GN=F511_41150 PE=4 SV=1	979.182	857.661	1024.43	1003.86	1033.61	1024.93	1602.37	373.9	1806.96	1003.86	1349.58	808.165	0	2	2	2	1	0				x	x	x
A0A2Z7A7K0_9LAMI	12	8	624.15	0.813968	0.78744	1.01598	0.0544919	Mutant	Ctrl	20519	Ribulose bisphosphate carboxylase small chain OS=Dorcoceras hygrometricum OX=472368 GN=F511_34498 PE=3 SV=1	49394.1	85590.2	39492.9	68909.1	58145.6	50211.3	80830.3	37313.4	69660.3	68909.1	75920.5	39591.9	13	10	10	7	12	9				x	x	x
A0A2Z7A8D7_9LAMI	5	2	27.7	0.656346	0.78744	2.27256	0.0664438	Mutant	Ctrl	66000	N-carbamoylputrescine amidase OS=Dorcoceras hygrometricum OX=472368 GN=F511_36944 PE=4 SV=1	432.59	129.698	595.786	227.522	239.454	2164.82	707.906	56.5421	1050.89	227.522	312.654	1706.97	1	0	1	0	0	0		x	x	x	x	x
A0A2Z7A8K9_9LAMI	12	5	84.41	0.836927	0.78744	1.00233	0.0534293	Mutant	Ctrl	118241	Dystroglycan-like OS=Dorcoceras hygrometricum OX=472368 GN=F511_38816 PE=4 SV=1	2165.41	3201.87	1306.54	2559.62	1901.97	2227.8	3543.56	1395.87	2304.57	2559.62	2483.4	1756.63	0	0	4	1	2	1				x	x	x
A0A2Z7A8N3_9LAMI	6	3	41.57	0.981692	0.811663	1.0109	0.0500423	Mutant	Ctrl	30723	Elongation factor Ts, mitochondrial OS=Dorcoceras hygrometricum OX=472368 GN=EFTS PE=3 SV=1	695.539	1116.43	1331.38	889.209	793.626	1494.79	1138.21	486.712	2348.39	889.209	1036.23	1178.65	1	1	0	1	0	1				x	x	x
A0A2Z7A9I9_9LAMI	4	4	182.63	0.0793991	0.45284	1.38011	0.430997	Mutant	Ctrl	35806	Uncharacterized protein OS=Dorcoceras hygrometricum OX=472368 GN=F511_25405 PE=3 SV=1	3956.27	5844.59	3858.87	6614.76	5635.11	6602.06	6474.18	2547.97	6806.54	6614.76	7357.74	5205.76	3	2	2	4	4	3				x	x	x
A0A2Z7A9X8_9LAMI	5	4	73.66	0.00138932	0.0803876	1.32932	0.999844	Mutant	Ctrl	45383	Fructose-1,6-bisphosphatase, chloroplastic-like OS=Dorcoceras hygrometricum OX=472368 GN=F511_21566 PE=3 SV=1	890.585	948.316	841.855	1207.73	1162.7	1193.14	1457.39	413.422	1484.92	1207.73	1518.14	940.795	2	1	2	1	3	1	x			x	x	x
A0A2Z7A373_9LAMI	3	2	34.96	0.478225	0.748617	1.081	0.0938933	Mutant	Ctrl	12435	Uncharacterized protein OS=Dorcoceras hygrometricum OX=472368 GN=F511_14360 PE=3 SV=1	1051.85	1243.54	866.555	1161.07	1202.72	1054.25	1721.28	542.124	1528.49	1161.07	1570.39	831.279	1	0	0	1	0	0				x	x	x
A0A2Z7A532_9LAMI	7	4	55.39	0.403579	0.696778	1.12235	0.112817	Mutant	Ctrl	106220	Putative receptor-like serine/threonine-protein kinase (Fragment) OS=Dorcoceras hygrometricum OX=472368 GN=F511_11391 PE=4 SV=1	7481.02	11209.1	7128.18	9163.52	9833.48	9980.14	12242.2	4886.65	12573.2	9163.52	12839.5	7869.4	1	0	0	2	1	0				x	x	x
A0A2Z7A704_9LAMI	5	3	123.92	0.139607	0.572675	1.59267	0.293918	Mutant	Ctrl	31670	Uncharacterized protein OS=Dorcoceras hygrometricum OX=472368 GN=F511_19290 PE=4 SV=1	3884.44	7136.78	2861.54	7706.7	5976.32	8427.67	6356.63	3111.3	5047.39	7706.7	7803.26	6645.26	3	3	1	3	4	3		x		x	x	x
A0A2Z7A728_9LAMI	4	3	72.97	0.853249	0.78744	1.01013	0.0527659	Mutant	Ctrl	34686	Uncharacterized protein OS=Dorcoceras hygrometricum OX=472368 GN=F511_18237 PE=4 SV=1	2352.22	3192	2252.39	2736.62	2579.57	2559.38	3849.26	1391.56	3972.91	2736.62	3368.14	2018.09	4	3	1	2	2	2				x	x	x
A0A2Z7A923_9LAMI	10	2	55.5	0.850336	0.78744	1.01178	0.0528789	Mutant	Ctrl	88459	Uncharacterized protein OS=Dorcoceras hygrometricum OX=472368 GN=F511_21770 PE=4 SV=1	417.503	444.038	405.502	414.224	402.395	465.352	683.218	193.58	715.253	414.224	525.406	366.933	0	0	1	0	1	0				x	x	x
A0A2Z7AA74_9LAMI	3	1	86.83	0.0585798	0.438004	2.2704	0.513015	Mutant	Ctrl	12171	Uncharacterized protein OS=Dorcoceras hygrometricum OX=472368 GN=F511_21559 PE=4 SV=1	178.06	189.646	154.612	408.872	216.549	560.452	291.383	82.6768	272.716	408.872	282.747	441.92	0	0	0	0	1	0		x	x	x	x	x
A0A2Z7AAH9_9LAMI	5	4	56.02	0.513385	0.771114	1.13494	0.0868285	Mutant	Ctrl	82012	Uncharacterized protein OS=Dorcoceras hygrometricum OX=472368 GN=F511_25372 PE=4 SV=1	1368.2	1368.95	1732.9	1435.52	1455.91	2181.8	2238.98	596.799	3056.61	1435.52	1900.98	1720.36	2	2	4	1	2	1				x	x	x
A0A2Z7AAV7_9LAMI	3	2	210.76	0.388197	0.695151	1.48101	0.117545	Mutant	Ctrl	34365	Plastid lipid associated protein CHRC OS=Dorcoceras hygrometricum OX=472368 GN=F511_26191 PE=4 SV=1	1400.14	5577.52	998.061	5095.19	1897.11	4819.86	2291.24	2431.54	1760.45	5095.19	2477.05	3800.48	2	1	3	3	3	2				x	x	x
A0A2Z7AB26_9LAMI	6	3	141.61	0.900012	0.794535	1.01243	0.0512723	Mutant	Ctrl	35182	1-aminocyclopropane-1-carboxylate oxidase OS=Dorcoceras hygrometricum OX=472368 GN=F511_13268 PE=3 SV=1	6111.3	10009.3	6385.07	7617.25	6133.94	9034.14	10000.8	4363.6	11262.4	7617.25	8009.07	7123.47	1	0	0	2	1	0				x	x	x
A0A2Z7ABB0_9LAMI	9	2	246.01	0.240116	0.637738	1.35764	0.18799	Mutant	Ctrl	47221	Uncharacterized protein OS=Dorcoceras hygrometricum OX=472368 GN=F511_12006 PE=3 SV=1	174.026	241.391	170.34	294.914	319.177	181.156	284.783	105.235	300.458	294.914	416.749	142.842	2	0	1	3	1	0				x	x	x
A0A2Z7AC66_9LAMI	8	4	61.8	0.32685	0.660247	1.29824	0.140222	Mutant	Ctrl	105204	Dystroglycan-like OS=Dorcoceras hygrometricum OX=472368 GN=F511_27819 PE=4 SV=1	4614.95	6348.92	7453.73	6824.67	6213.26	10872.6	7552.08	2767.83	13147.4	6824.67	8112.63	8573.09	1	1	2	2	2	2				x	x	x
A0A2Z7ACJ1_9LAMI	5	2	33.54	0.128668	0.55351	2.10716	0.312184	Mutant	Ctrl	40395	Protein disulfide-isomerase like 2-1 OS=Dorcoceras hygrometricum OX=472368 GN=F511_31843 PE=3 SV=1	1435.82	2578.07	1873.06	3125.4	2449.8	6829.54	2349.63	1123.92	3303.84	3125.4	3198.7	5385.13	1	0	1	0	2	0		x	x	x	x	x
A0A2Z7ACM8_9LAMI	8	2	263.15	0.0322827	0.409595	1.15097	0.677356	Mutant	Ctrl	42988	Fructose-bisphosphate aldolase OS=Dorcoceras hygrometricum OX=472368 GN=F511_06377 PE=3 SV=1	615.529	689.758	636.599	757.875	704.846	772.322	1007.27	300.702	1122.88	757.875	920.315	608.981	2	1	2	2	3	1	x			x	x	x
A0A2Z7ACT6_9LAMI	7	3	45.72	0.316413	0.656374	1.12153	0.144819	Mutant	Ctrl	42984	Uncharacterized protein OS=Dorcoceras hygrometricum OX=472368 GN=F511_25878 PE=4 SV=1	2652.86	3743.63	2976.12	3707.87	3258.12	3545.71	4341.23	1632.05	5249.48	3707.87	4254.11	2795.82	1	1	2	0	0	1				x	x	x
A0A2Z7ADZ2_9LAMI	6	4	52.35	0.150027	0.576414	1.37741	0.278289	Mutant	Ctrl	34536	Protein FLUORESCENT IN BLUE LIGHT, chloroplastic OS=Dorcoceras hygrometricum OX=472368 GN=F511_29479 PE=4 SV=1	6348.6	10377.2	5836.88	10384.3	8960.94	11732.7	10389.1	4523.96	10295.5	10384.3	11700.3	9251.31	2	3	1	1	0	2				x	x	x
A0A2Z7AE64_9LAMI	5	1	31.85	0.000220055	0.030014	5.59763	1	Mutant	Ctrl	37325	Syntaxin-32 OS=Dorcoceras hygrometricum OX=472368 GN=F511_28925 PE=3 SV=1	442.86	298.79	349.205	1991.58	1798.19	2316.43	724.713	130.259	615.952	1991.58	2347.89	1826.52	1	0	1	2	2	1	x	x	x	x	x	x
A0A2Z7AEV5_9LAMI	4	1	190.36	0.697509	0.78744	1.03122	0.0624508	Mutant	Ctrl	26330	Mitochondrial outer membrane protein porin of 34 kDa OS=Dorcoceras hygrometricum OX=472368 GN=F511_32762 PE=4 SV=1	1042.57	1406.89	1075.33	1211.31	1191.79	1231.75	1706.11	613.341	1896.75	1211.31	1556.12	971.244	1	0	1	2	1	1				x	x	x
A0A2Z7AFP7_9LAMI	9	6	243.59	0.0461317	0.42658	1.24406	0.579277	Mutant	Ctrl	93936	Endoplasmin OS=Dorcoceras hygrometricum OX=472368 GN=F511_00987 PE=3 SV=1	1532.86	1615.4	1386.37	1940.86	1663.08	2037.44	2508.42	704.241	2445.38	1940.86	2171.48	1606.53	4	1	2	4	6	6	x			x	x	x
A0A2Z7AG08_9LAMI	17	8	479.85	0.0796825	0.45284	1.19183	0.430062	Mutant	Ctrl	102675	tRNA dimethylallyltransferase 9-like OS=Dorcoceras hygrometricum OX=472368 GN=F511_01077 PE=3 SV=1	3000.94	3584.9	2988.68	3563.94	4154.02	3693.27	4910.85	1562.85	5271.63	3563.94	5423.89	2912.16	9	2	6	5	7	6				x	x	x
A0A2Z7AG43_9LAMI	3	1	35.58	0.753791	0.78744	1.07909	0.0580372	Mutant	Ctrl	36467	Uncharacterized protein OS=Dorcoceras hygrometricum OX=472368 GN=F511_25529 PE=3 SV=1	746.09	1353.95	806.504	881.06	841.336	1414.02	1220.93	590.257	1422.57	881.06	1098.53	1114.96	0	0	0	0	1	0				x	x	x
A0A2Z7AGB8_9LAMI	15	8	158.23	0.0945818	0.482255	1.20616	0.385995	Mutant	Ctrl	88795	ATP-dependent zinc metalloprotease FTSH, chloroplastic-like OS=Dorcoceras hygrometricum OX=472368 GN=F511_00949 PE=3 SV=1	3602.66	4700.8	4048.79	4935.41	5345.16	4618.22	5895.53	2049.33	7141.54	4935.41	6979.16	3641.5	2	2	2	2	3	3				x	x	x
A0A2Z7AGN9_9LAMI	3	2	47	0.158696	0.584504	1.16974	0.266417	Mutant	Ctrl	17815	Pathogenesis-related protein STH-21-like OS=Dorcoceras hygrometricum OX=472368 GN=F511_09247 PE=4 SV=1	478.533	473.331	495.548	562.392	482.327	648.371	783.089	206.35	874.082	562.392	629.773	511.244	2	0	1	0	1	0				x	x	x
A0A2Z7AGT9_9LAMI	8	2	53.97	0.247783	0.637738	1.44333	0.182703	Mutant	Ctrl	38175	Putative WRKY transcription factor 29-like OS=Dorcoceras hygrometricum OX=472368 GN=F511_39598 PE=4 SV=1	1455.68	2450.76	1887.55	2336.04	2031.17	3995.43	2382.12	1068.42	3329.39	2336.04	2652.09	3150.42	1	0	1	0	0	0				x	x	x
A0A2Z7AHM1_9LAMI	9	3	58.32	0.00476073	0.144296	2.1949	0.984094	Mutant	Ctrl	34591	SET and MYND domain-containing protein OS=Dorcoceras hygrometricum OX=472368 GN=F511_15012 PE=4 SV=1	4285.53	5799.81	3630.8	10400.1	9330.86	10374.5	7013	2528.45	6404.25	10400.1	12183.3	8180.36	0	1	0	1	0	1	x	x	x	x	x	x
A0A2Z7AI58_9LAMI;A0A2Z7AHY7_9LAMI	27	2	870.39	0.538822	0.773211	1.15432	0.0823063	Mutant	Ctrl	64377	Chaperonin 60 subunit beta 2, chloroplastic OS=Dorcoceras hygrometricum OX=472368 GN=F511_08268 PE=3 SV=1	295.437	417.589	684.993	89.3913	100.974	1423.39	483.464	182.049	1208.24	89.3913	131.841	1122.35	0	1	0	0	0	1				x	x	x
A0A2Z7AIF0_9LAMI	3	2	173.95	0.514151	0.771114	1.24369	0.0866857	Mutant	Ctrl	25145	Peroxiredoxin-2E-2, chloroplastic OS=Dorcoceras hygrometricum OX=472368 GN=F511_35383 PE=4 SV=1	2338.23	3056.68	1566.32	3623.13	3249.7	1784.76	3826.37	1332.57	2762.78	3623.13	4243.13	1407.3	2	1	1	2	2	0				x	x	x
A0A2Z7AIP9_9LAMI	4	2	40.43	0.0302072	0.409595	1.4677	0.695062	Mutant	Ctrl	26837	Allene oxide cyclase 4, chloroplastic-like OS=Dorcoceras hygrometricum OX=472368 GN=F511_08434 PE=4 SV=1	411.413	439.28	497.195	619.263	566.918	792.113	673.251	191.506	876.987	619.263	740.224	624.586	0	0	2	1	0	1	x			x	x	x
A0A2Z7AIY7_9LAMI	7	3	43.71	0.00393078	0.134033	1.32452	0.990626	Mutant	Ctrl	91593	Aminoacylase-1 OS=Dorcoceras hygrometricum OX=472368 GN=F511_08271 PE=4 SV=1	1152.42	1326.93	1241.35	1653.89	1570.41	1703.84	1885.86	578.48	2189.58	1653.89	2050.48	1343.49	0	0	2	0	2	0	x			x	x	x
A0A2Z7AJ73_9LAMI	8	4	104.81	0.555068	0.777438	3.38804	0.0796485	Mutant	Ctrl	30988	Uncharacterized protein OS=Dorcoceras hygrometricum OX=472368 GN=F511_14950 PE=4 SV=1	1481.01	578.992	3416.87	972.109	16238	1345.76	2423.58	252.414	6026.91	972.109	21201.9	1061.14	1	2	4	1	3	1		x	x	x	x	x
A0A2Z7AJA0_9LAMI	9	2	112.36	0.131727	0.55351	2.18183	0.306865	Mutant	Ctrl	86796	DEAD-box ATP-dependent RNA helicase 31-like OS=Dorcoceras hygrometricum OX=472368 GN=F511_05585 PE=4 SV=1	144.561	210.87	51.1807	212.856	250.697	423.606	236.565	91.9297	90.2761	212.856	327.334	334.016	1	1	1	2	2	2		x	x	x	x	x
A0A2Z7AK80_9LAMI	4	2	44.26	0.165786	0.584504	1.22527	0.257381	Mutant	Ctrl	37837	Uncharacterized protein OS=Dorcoceras hygrometricum OX=472368 GN=F511_35736 PE=4 SV=1	931.179	1407.98	983.696	1390.66	1340.4	1340.35	1523.82	613.813	1735.11	1390.66	1750.16	1056.87	1	1	1	1	3	2				x	x	x
A0A2Z7AKU4_9LAMI	5	3	67.42	0.369275	0.682938	1.36361	0.12384	Mutant	Ctrl	25045	Putative glutathione S-transferase parC-like OS=Dorcoceras hygrometricum OX=472368 GN=F511_34057 PE=3 SV=1	3762.48	3518.14	3909.07	4301.21	7624.25	3332.96	6157.06	1533.75	6895.1	4301.21	9954.96	2628.06	5	0	2	1	3	1				x	x	x
A0A2Z7AL30_9LAMI	5	3	33.63	0.754356	0.78744	1.06151	0.0579985	Mutant	Ctrl	78397	Histone-lysine N-methyltransferase, H3 lysine-9 specific SUVH1-like OS=Dorcoceras hygrometricum OX=472368 GN=F511_19715 PE=4 SV=1	5933.33	7732.76	4931.12	7285.39	7438.71	5017.06	9709.52	3371.12	8697.85	7285.39	9712.71	3955.98	2	3	3	3	3	2				x	x	x
A0A2Z7ALQ1_9LAMI	6	2	130.69	0.816533	0.78744	1.01517	0.0543655	Mutant	Ctrl	36953	Uncharacterized protein OS=Dorcoceras hygrometricum OX=472368 GN=F511_05357 PE=4 SV=1	1753.01	2030.98	1523.25	1874.66	1728.8	1784.27	2868.7	885.414	2686.81	1874.66	2257.29	1406.91	1	0	0	0	1	1				x	x	x
A0A2Z7ALR2_9LAMI	3	1	22.18	0.243552	0.637738	1.09357	0.185588	Mutant	Ctrl	31719	Protein EXORDIUM-like 2 OS=Dorcoceras hygrometricum OX=472368 GN=F511_05383 PE=4 SV=1	488.892	600.076	492.32	582.676	560.156	586.423	800.041	261.605	868.388	582.676	731.394	462.398	1	0	2	1	1	1				x	x	x
A0A2Z7AMS4_9LAMI	8	4	285.03	0.673248	0.78744	1.07376	0.06472	Mutant	Ctrl	27407	Chlorophyll a-b binding protein, chloroplastic OS=Dorcoceras hygrometricum OX=472368 GN=F511_05388 PE=3 SV=1	5344.81	8459.6	5231.17	6744.97	5611.74	8082.84	8746.44	3687.99	9227.1	6744.97	7327.24	6373.37	6	4	8	4	6	5				x	x	x
A0A2Z7AN21_9LAMI	12	10	285.69	0.753391	0.78744	1.02854	0.0580646	Mutant	Ctrl	40614	Ferredoxin--NADP reductase, chloroplastic OS=Dorcoceras hygrometricum OX=472368 GN=F511_11524 PE=3 SV=1	8517.03	13999.6	6467.62	9494.67	9378.12	10938.7	13937.6	6103.2	11408	9494.67	12245	8625.22	7	3	2	6	4	6				x	x	x
A0A2Z7ANE7_9LAMI	2	2	110.62	0.771277	0.78744	1.05174	0.0568887	Mutant	Ctrl	27607	Chlorophyll a-b binding protein, chloroplastic OS=Dorcoceras hygrometricum OX=472368 GN=F511_02206 PE=3 SV=1	1577.48	2201	1821.57	1809.47	1660.26	2420.07	2581.45	959.534	3213.02	1809.47	2167.79	1908.24	2	1	4	1	3	1				x	x	x
A0A2Z7ANF7_9LAMI	2	2	19.47	0.567067	0.781255	1.12445	0.0777925	Mutant	Ctrl	27495	30S ribosomal protein 2, chloroplastic OS=Dorcoceras hygrometricum OX=472368 GN=F511_28531 PE=4 SV=1	504.426	867.63	317.158	750.277	533.515	615.65	825.462	378.246	559.426	750.277	696.609	485.443	1	2	0	1	3	2				x	x	x
A0A2Z7APN5_9LAMI	9	5	270.88	0.620306	0.78744	1.07717	0.0705434	Mutant	Ctrl	61809	Chaperonin-60kD, ch60 OS=Dorcoceras hygrometricum OX=472368 GN=F511_26237 PE=3 SV=1	2694.78	5116.27	2671.59	3574.07	3495.46	4222.05	4409.83	2230.46	4712.34	3574.07	4564.01	3329.11	2	1	0	6	4	1				x	x	x
A0A2Z7APQ9_9LAMI	4	1	35.55	0.153199	0.584486	2.43427	0.273834	Mutant	Ctrl	32610	Uncharacterized protein OS=Dorcoceras hygrometricum OX=472368 GN=F511_37790 PE=4 SV=1	32.9824	8.34765	28.3087	53.011	87.5292	28.9791	53.9736	3.63919	49.9329	53.011	114.287	22.8502	0	0	0	1	1	0		x	x	x	x	x
A0A2Z7APR9_9LAMI	2	1	66.97	0.672692	0.78744	1.11224	0.0647748	Mutant	Ctrl	17529	MLP-like protein 34-like OS=Dorcoceras hygrometricum OX=472368 GN=F511_30715 PE=4 SV=1	2502.62	4516.51	2457.76	3431.09	2533.01	4576.48	4095.39	1968.99	4335.18	3431.09	3307.34	3608.58	2	2	2	2	1	2				x	x	x
A0A2Z7AQK3_9LAMI;A0A2Z7BBW8_9LAMI	3	2	98.83	0.585386	0.78744	1.06918	0.0751237	Mutant	Ctrl	13992	Profilin OS=Dorcoceras hygrometricum OX=472368 GN=F511_17652 PE=3 SV=1	585.665	453.37	616.869	574.835	524.988	670.64	958.403	197.648	1088.08	574.835	685.475	528.804	3	1	3	1	1	1				x	x	x
A0A2Z7AR13_9LAMI	5	2	126.53	0.793703	0.78744	1.16481	0.0555595	Mutant	Ctrl	43921	Malate dehydrogenase OS=Dorcoceras hygrometricum OX=472368 GN=F511_02211 PE=4 SV=1	11.5534	2.89535	71.5327	9.51513	8.43399	82.2032	18.9064	1.26224	126.174	9.51513	11.0122	64.8177	0	0	1	0	0	1				x	x	x
A0A2Z7AR36_9LAMI	5	3	269.28	0.179106	0.590141	1.33736	0.241835	Mutant	Ctrl	35551	Carbonic anhydrase OS=Dorcoceras hygrometricum OX=472368 GN=F511_22488 PE=3 SV=1	2594.45	3397.05	2134.79	4510.45	3337.41	3019.93	4245.65	1480.96	3765.49	4510.45	4357.65	2381.23	4	1	6	4	7	3				x	x	x
A0A2Z7AR96_9LAMI	6	3	38.07	0.271643	0.649475	1.15572	0.167785	Mutant	Ctrl	79512	Mitogen-activated protein kinase kinase kinase 7-like OS=Dorcoceras hygrometricum OX=472368 GN=F511_05567 PE=4 SV=1	1544.06	1711.69	1215.48	1846.64	1518.88	1801.96	2526.75	746.216	2143.94	1846.64	1983.2	1420.86	0	1	2	1	1	2				x	x	x
A0A2Z7ARC4_9LAMI	4	1	45.75	0.859822	0.78744	1.00459	0.0525199	Mutant	Ctrl	29748	Uncharacterized protein OS=Dorcoceras hygrometricum OX=472368 GN=F511_26658 PE=3 SV=1	2555.74	4152.97	2124.89	3084.62	2534.68	3254.88	4182.31	1810.5	3748.03	3084.62	3309.52	2566.49	0	1	0	0	0	0				x	x	x
A0A2Z7AS07_9LAMI;A0A2Z7BV75_9LAMI	6	3	132.21	0.272795	0.649475	1.3637	0.167118	Mutant	Ctrl	23425	Dehydroascorbate reductase family protein OS=Dorcoceras hygrometricum OX=472368 GN=F511_11280 PE=3 SV=1	333.219	435.722	246.489	567.88	500.101	316.764	545.292	189.954	434.774	567.88	652.981	249.77	1	2	1	2	3	2				x	x	x
A0A2Z7ASD3_9LAMI	3	1	41.18	0.193821	0.603439	1.24298	0.226529	Mutant	Ctrl	49616	RuBisCO large subunit-binding protein subunit beta, chloroplastic OS=Dorcoceras hygrometricum OX=472368 GN=F511_01788 PE=4 SV=1	2651.76	3987.24	2435.05	3569.23	3816.78	3892.81	4339.44	1738.25	4295.11	3569.23	4983.56	3069.5	0	0	0	1	0	1				x	x	x
A0A2Z7ASN3_9LAMI	4	4	34.46	0.163472	0.584504	1.55811	0.260267	Mutant	Ctrl	42823	Methylesterase 11, chloroplastic OS=Dorcoceras hygrometricum OX=472368 GN=F511_24756 PE=4 SV=1	2442.23	3033.07	1090.97	3401.88	3428.26	3400.82	3996.55	1322.28	1924.32	3401.88	4476.27	2681.57	1	1	1	0	4	0		x		x	x	x
A0A2Z7ATS5_9LAMI	9	1	197.9	0.196591	0.603439	1.13514	0.22384	Mutant	Ctrl	16084	Histone H2B OS=Dorcoceras hygrometricum OX=472368 GN=F511_12500 PE=3 SV=1	1686.63	2000.45	1736.69	1937.69	1906.68	2312.35	2760.07	872.102	3063.3	1937.69	2489.54	1823.3	0	0	0	2	0	0				x	x	x
A0A2Z7ATT3_9LAMI	7	5	281.14	0.772192	0.78744	1.02688	0.0568313	Mutant	Ctrl	33449	Uncharacterized protein OS=Dorcoceras hygrometricum OX=472368 GN=F511_32032 PE=4 SV=1	9120.91	13037.9	7927.57	10899.4	9532.18	10463.4	14925.8	5683.91	13983.2	10899.4	12446.1	8250.46	7	5	2	5	4	4				x	x	x
A0A2Z7ATT5_9LAMI;A0A2Z6ZQE3_9LAMI	10	3	261.26	0.45172	0.729514	1.10344	0.099936	Mutant	Ctrl	17907	Uncharacterized protein OS=Dorcoceras hygrometricum OX=472368 GN=F511_02639 PE=4 SV=1	8293.76	12423.3	8427.74	10615.9	10031.1	11512.6	13572.2	5415.98	14865.4	10615.9	13097.6	9077.73	1	0	2	1	1	0				x	x	x
A0A2Z7AUR3_9LAMI	4	4	44.42	0.805113	0.78744	1.04345	0.0549431	Mutant	Ctrl	98246	Transcriptional corepressor SEUSS-like OS=Dorcoceras hygrometricum OX=472368 GN=F511_05008 PE=4 SV=1	16844.8	83383.7	10317.6	22541	15613.8	77194.8	27565.5	36351.4	18198.9	22541	20386.9	60868.5	2	1	3	3	3	4				x	x	x
A0A2Z7AUY9_9LAMI	6	2	58.16	0.60996	0.78744	1.09394	0.0718347	Mutant	Ctrl	63521	Peptidylprolyl isomerase OS=Dorcoceras hygrometricum OX=472368 GN=F511_04782 PE=4 SV=1	1647.94	2910.16	1036.34	1966.45	1782.16	2371.36	2696.75	1268.69	1827.96	1966.45	2326.96	1869.83	1	2	2	1	2	1				x	x	x
A0A2Z7AV90_9LAMI	6	1	66.46	0.159614	0.584504	1.58881	0.265216	Mutant	Ctrl	133258	Nardilysin-like OS=Dorcoceras hygrometricum OX=472368 GN=F511_04845 PE=3 SV=1	498.342	526.521	198.509	689.042	605.542	649.123	815.505	229.539	350.144	689.042	790.654	511.837	0	0	0	0	1	0		x		x	x	x
A0A2Z7AVT9_9LAMI;A0A2Z7A0F8_9LAMI	4	3	101.48	0.00105301	0.079873	2.30021	0.999967	Mutant	Ctrl	32117	Fructose-1,6-bisphosphatase, cytosolic OS=Dorcoceras hygrometricum OX=472368 GN=F511_30489 PE=3 SV=1	234.332	183.949	249.596	478.259	530.846	527.152	383.47	80.1933	440.254	478.259	693.124	415.662	3	0	3	2	2	2	x	x	x	x	x	x
A0A2Z7AWG2_9LAMI	5	3	23.98	0.451957	0.729514	1.07376	0.0998789	Mutant	Ctrl	73462	Uncharacterized protein OS=Dorcoceras hygrometricum OX=472368 GN=F511_04739 PE=4 SV=1	704.388	893.722	662.028	816.363	770.185	840.297	1152.69	389.621	1167.73	816.363	1005.63	662.579	1	0	0	3	1	0				x	x	x
A0A2Z7AXD5_9LAMI	7	2	116.58	0.462892	0.742452	1.12047	0.0973076	Mutant	Ctrl	17273	Uncharacterized protein OS=Dorcoceras hygrometricum OX=472368 GN=F511_26659 PE=4 SV=1	1018.86	1284.4	906.871	1324.36	976.198	1296.3	1667.29	559.94	1599.6	1324.36	1274.62	1022.14	1	0	1	0	0	0				x	x	x
A0A2Z7AXE8_9LAMI	4	4	37.29	0.708794	0.78744	1.03956	0.0614736	Mutant	Ctrl	46196	DegP protease 1 isoform 1 OS=Dorcoceras hygrometricum OX=472368 GN=F511_22487 PE=4 SV=1	2661.38	4360.38	2864.6	3324.33	3338.9	3614.21	4355.18	1900.92	5052.78	3324.33	4359.59	2849.83	2	0	1	2	0	2				x	x	x
A0A2Z7AXT7_9LAMI	10	1	204.47	0.22027	0.630946	1.29999	0.202985	Mutant	Ctrl	29957	Uncharacterized protein (Fragment) OS=Dorcoceras hygrometricum OX=472368 GN=F511_04821 PE=3 SV=1	629.33	1082.12	580.815	1118.48	903.447	957.994	1029.86	471.755	1024.48	1118.48	1179.63	755.384	0	1	0	0	2	1				x	x	x
A0A2Z7AXX2_9LAMI	2	2	58.56	0.466777	0.742452	1.15437	0.0964218	Mutant	Ctrl	19389	Plasma membrane-associated cation-binding protein 1 OS=Dorcoceras hygrometricum OX=472368 GN=F511_01791 PE=4 SV=1	1395.56	5101.15	1276.69	2920.08	2993.23	3060.04	2283.75	2223.86	2251.92	2920.08	3908.25	2412.86	2	0	1	0	1	1				x	x	x
A0A2Z7AY27_9LAMI	6	1	62.11	0.876071	0.78744	1.09766	0.0519629	Mutant	Ctrl	28502	Uncharacterized protein OS=Dorcoceras hygrometricum OX=472368 GN=F511_06638 PE=4 SV=1	158.896	193.157	191.008	154.897	143.203	297.999	260.024	84.2077	336.913	154.897	186.979	234.974	0	0	0	0	0	1				x	x	x
A0A2Z7AYS8_9LAMI	16	4	745.68	0.692661	0.78744	1.00235	0.0628856	Mutant	Ctrl	54240	Ribulose bisphosphate carboxylase/oxygenase activase, chloroplastic OS=Dorcoceras hygrometricum OX=472368 GN=F511_06046 PE=4 SV=1	2396.53	7105.74	1912.14	3441.38	4222.02	3777.76	3921.77	3097.77	3372.76	3441.38	5512.68	2978.79	3	0	4	1	3	0				x	x	x
A0A2Z7AYX0_9LAMI	4	1	63.99	0.0461132	0.42658	1.28175	0.579389	Mutant	Ctrl	37041	1,4-Dihydroxy-2-naphthoyl-CoA synthase, peroxisomal-like OS=Dorcoceras hygrometricum OX=472368 GN=F511_24217 PE=3 SV=1	1338.19	1482.64	1501.67	1783.21	2123.45	1633.69	2189.86	646.364	2648.75	1783.21	2772.58	1288.18	0	1	0	0	0	0	x			x	x	x
A0A2Z7B1G6_9LAMI	4	3	107.81	0.090425	0.478274	1.96383	0.397366	Mutant	Ctrl	54218	Succinate-semialdehyde dehydrogenase, mitochondrial OS=Dorcoceras hygrometricum OX=472368 GN=F511_11597 PE=3 SV=1	836.377	434.944	995.418	1277.86	2061.05	1112.57	1368.68	189.616	1755.79	1277.86	2691.1	877.268	3	0	2	2	3	1		x		x	x	x
A0A2Z7B1S4_9LAMI	5	2	51.46	0.866437	0.78744	1.0124	0.0522844	Mutant	Ctrl	103666	Putative alpha,alpha-trehalose-phosphate synthase OS=Dorcoceras hygrometricum OX=472368 GN=F511_04663 PE=4 SV=1	1554.9	2322.32	1252.01	2025.93	1710.76	1456.12	2544.49	1012.42	2208.37	2025.93	2233.73	1148.16	1	2	2	2	4	1				x	x	x
A0A2Z7B2G2_9LAMI	22	2	844.97	0.0110265	0.222806	1.84989	0.909281	Mutant	Ctrl	63143	Chaperonin 60 subunit beta 2, chloroplastic OS=Dorcoceras hygrometricum OX=472368 GN=F511_04753 PE=4 SV=1	2460.46	2168.75	2598.1	4223.48	3620.64	5525.61	4026.39	945.473	4582.71	4223.48	4727.46	4356.97	1	0	1	0	0	2	x	x		x	x	x
A0A2Z7B2J2_9LAMI	3	3	37.37	0.038033	0.425923	2.86647	0.632766	Mutant	Ctrl	35201	4-hydroxy-tetrahydrodipicolinate synthase OS=Dorcoceras hygrometricum OX=472368 GN=F511_04798 PE=3 SV=1	1959.48	730.172	2551.88	5185.33	4434.07	5405.28	3206.56	318.321	4501.18	5185.33	5789.55	4262.1	1	1	1	1	1	2	x	x	x	x	x	x
A0A2Z7B2V8_9LAMI	5	2	45.93	0.038247	0.425923	1.96851	0.631222	Mutant	Ctrl	37492	Uncharacterized protein OS=Dorcoceras hygrometricum OX=472368 GN=F511_25275 PE=4 SV=1	159.841	206.828	97.9769	352.454	299.75	262.457	261.57	90.1675	172.819	352.454	391.383	206.948	1	1	0	0	0	0	x	x		x	x	x
A0A2Z7B3C9_9LAMI	9	4	133.99	0.846621	0.78744	1.02615	0.0530263	Mutant	Ctrl	106370	Cyclic nucleotide-gated ion channel 15 OS=Dorcoceras hygrometricum OX=472368 GN=F511_06336 PE=4 SV=1	2945.09	5164.37	2864.94	3664.26	2959.66	4637.48	4819.46	2251.43	5053.39	3664.26	3864.41	3656.68	0	2	2	3	0	2				x	x	x
A0A2Z7B4U0_9LAMI	2	2	45.79	0.584141	0.78744	1.06737	0.0752989	Mutant	Ctrl	30485	Uncharacterized protein OS=Dorcoceras hygrometricum OX=472368 GN=F511_13678 PE=4 SV=1	544.73	681.179	563.596	588.113	578.654	743.302	891.416	296.963	994.109	588.113	755.547	586.098	1	1	2	1	1	1				x	x	x
A0A2Z7B4U9_9LAMI	2	2	56.9	0.311604	0.654563	1.10756	0.147024	Mutant	Ctrl	24992	Photosystem I reaction center subunit III, chloroplastic-like OS=Dorcoceras hygrometricum OX=472368 GN=F511_15913 PE=4 SV=1	2453.75	2432.46	3055.37	2635.67	3090.99	3069.12	4015.41	1060.44	5389.27	2635.67	4035.9	2420.02	3	3	2	2	4	3				x	x	x
A0A2Z7B4W0_9LAMI	4	2	50.09	0.280911	0.649475	1.30835	0.162543	Mutant	Ctrl	53933	7-deoxyloganetin glucosyltransferase-like OS=Dorcoceras hygrometricum OX=472368 GN=F511_13698 PE=4 SV=1	2714.39	4692.89	2077.47	3792.03	3701.05	4916.3	4441.92	2045.88	3664.39	3792.03	4832.45	3876.53	1	0	0	2	0	1				x	x	x
A0A2Z7B5F7_9LAMI	6	3	43.35	0.251981	0.639413	2.51732	0.179917	Mutant	Ctrl	66248	Polyphenol oxidase, chloroplastic-like OS=Dorcoceras hygrometricum OX=472368 GN=F511_05839 PE=4 SV=1	577.605	35.6496	829.552	849.189	2126.87	655.955	945.215	15.5416	1463.22	849.189	2777.04	517.225	0	0	1	1	2	1		x	x	x	x	x
A0A2Z7B6C3_9LAMI	18	8	463.58	0.834551	0.78744	1.02583	0.0535322	Mutant	Ctrl	47729	Peroxisomal (S)-2-hydroxy-acid oxidase-like OS=Dorcoceras hygrometricum OX=472368 GN=F511_05827 PE=3 SV=1	6027.05	7529.23	5703.56	7026.08	7176.3	5554.86	9862.88	3282.4	10060.3	7026.08	9370.07	4380.04	9	4	8	5	8	5				x	x	x
A0A2Z7B6P0_9LAMI	12	2	273.83	0.230928	0.637738	1.39781	0.194684	Mutant	Ctrl	67688	V-type proton ATPase catalytic subunit A OS=Dorcoceras hygrometricum OX=472368 GN=F511_04578 PE=3 SV=1	387.129	664.013	253.538	693.328	537.537	592.83	633.513	289.479	447.208	693.328	701.86	467.45	1	2	0	3	2	3				x	x	x
A0A2Z7B7N0_9LAMI	2	1	36.72	0.00254885	0.10155	4.43541	0.99775	Mutant	Ctrl	66685	Cationic amino acid transporter 8, vacuolar-like OS=Dorcoceras hygrometricum OX=472368 GN=F511_05844 PE=4 SV=1	66.6836	76.397	88.1642	340.506	456.902	228.258	109.124	33.3055	155.51	340.506	596.576	179.983	0	0	1	0	0	0	x	x	x	x	x	x
A0A2Z7B7P4_9LAMI	11	3	94.07	0.149327	0.576414	1.21014	0.279291	Mutant	Ctrl	112850	Dystroglycan-like OS=Dorcoceras hygrometricum OX=472368 GN=F511_35225 PE=4 SV=1	1154.53	1168.98	913.047	1328.96	1136.02	1451.7	1889.32	509.619	1610.5	1328.96	1483.3	1144.68	0	0	2	2	2	2				x	x	x
A0A2Z7B7S2_9LAMI	10	3	76	0.937923	0.802006	1.05235	0.050488	Mutant	Ctrl	81163	Myosin-2 heavy chain-like OS=Dorcoceras hygrometricum OX=472368 GN=F511_39481 PE=3 SV=1	338.85	501.966	431.396	569.272	279.588	489.951	554.506	218.834	760.926	569.272	365.057	386.329	3	2	0	2	1	0				x	x	x
A0A2Z7B8W4_9LAMI	6	4	58.3	0.765247	0.78744	1.02404	0.0572735	Mutant	Ctrl	70057	Translation initiation factor eIF-2B subunit gamma OS=Dorcoceras hygrometricum OX=472368 GN=F511_05731 PE=3 SV=1	3729.72	7020.35	3247.98	4821.3	4219.26	5294.03	6103.45	3060.54	5729.01	4821.3	5509.07	4174.37	1	0	1	1	0	3				x	x	x
A0A2Z7B9C5_9LAMI	2	1	59.53	0.000618167	0.0562093	1.70979	0.999999	Mutant	Ctrl	14205	Uncharacterized protein OS=Dorcoceras hygrometricum OX=472368 GN=F511_16579 PE=4 SV=1	127.391	122.24	120.679	201.294	198.305	233.556	208.468	53.291	212.863	201.294	258.926	184.16	1	0	0	1	1	0	x	x		x	x	x
A0A2Z7B028_9LAMI;A0A2H5BTU3_9LAMI	11	1	551.43	0.50899	0.770881	1.25581	0.0876576	Mutant	Ctrl	33086	Glyceraldehyde-3-phosphate dehydrogenase, cytosolic-like OS=Dorcoceras hygrometricum OX=472368 GN=F511_14735 PE=3 SV=1	522.099	237.694	702.087	552.735	861.206	421.899	854.382	103.624	1238.39	552.735	1124.47	332.67	1	0	1	1	2	1				x	x	x
A0A2Z7B201_9LAMI	2	1	56.72	0.734726	0.78744	1.0261	0.0594061	Mutant	Ctrl	44333	26S proteasome non-ATPase regulatory subunit 13A OS=Dorcoceras hygrometricum OX=472368 GN=F511_27517 PE=4 SV=1	124.528	117.715	142.772	121.465	142.831	130.769	203.782	51.3182	251.831	121.465	186.495	103.112	1	0	2	1	1	0				x	x	x
A0A2Z7B255_9LAMI	4	3	47.74	0.68118	0.78744	1.0447	0.0639522	Mutant	Ctrl	15834	Uncharacterized protein OS=Dorcoceras hygrometricum OX=472368 GN=F511_04790 PE=4 SV=1	351.701	554.623	343.262	431.977	442.226	431.242	575.536	241.79	605.469	431.977	577.413	340.037	1	1	1	2	2	1				x	x	x
A0A2Z7B844_9LAMI	6	1	35.46	0.0602088	0.438004	1.51482	0.505472	Mutant	Ctrl	78149	Uncharacterized protein OS=Dorcoceras hygrometricum OX=472368 GN=F511_35377 PE=4 SV=1	306.039	313.96	311.463	494.159	572.658	344.18	500.814	136.872	549.381	494.159	747.718	271.388	0	0	2	0	0	0		x		x	x	x
A0A2Z7BAG6_9LAMI	4	2	58.88	0.304075	0.654563	1.44387	0.150592	Mutant	Ctrl	47489	Fibroin heavy chain-like OS=Dorcoceras hygrometricum OX=472368 GN=F511_06228 PE=4 SV=1	5726.39	1566.77	4521.13	6309.23	6331.37	4417.66	9370.88	683.038	7974.68	6309.23	8266.86	3483.35	0	0	0	0	1	1				x	x	x
A0A2Z7BAK6_9LAMI	3	2	59.45	0.378838	0.693372	1.16969	0.120589	Mutant	Ctrl	27048	Uncharacterized protein OS=Dorcoceras hygrometricum OX=472368 GN=F511_13004 PE=4 SV=1	357.85	237.961	466.353	422.337	411.156	408.914	585.6	103.74	822.586	422.337	536.846	322.431	1	0	2	1	2	2				x	x	x
A0A2Z7BC01_9LAMI	3	2	39.83	0.118377	0.53963	1.52493	0.331431	Mutant	Ctrl	19017	Glutathione peroxidase OS=Dorcoceras hygrometricum OX=472368 GN=F511_07398 PE=3 SV=1	569.339	400.857	797.131	775.507	819.137	1100.4	931.688	174.755	1406.03	775.507	1069.55	867.675	1	0	2	3	1	1		x		x	x	x
A0A2Z7BC02_9LAMI	6	2	73.32	0.776203	0.78744	1.05437	0.0565831	Mutant	Ctrl	21781	40S ribosomal protein S7 OS=Dorcoceras hygrometricum OX=472368 GN=F511_00584 PE=3 SV=1	1062.1	1655.4	1055.18	1668.45	1092.68	1216.69	1738.06	721.676	1861.2	1668.45	1426.7	959.364	1	0	1	0	0	1				x	x	x
A0A2Z7BCC8_9LAMI	3	3	30.88	0.481742	0.750825	1.17009	0.0931403	Mutant	Ctrl	11161	Uncharacterized protein OS=Dorcoceras hygrometricum OX=472368 GN=F511_00481 PE=3 SV=1	8859.42	16826.1	7760.64	11861.2	11208.7	16065.2	14497.9	7335.39	13688.8	11861.2	14635.1	12667.5	5	3	3	4	3	3				x	x	x
A0A2Z7BCN2_9LAMI	3	1	33.83	0.0432021	0.42658	1.82008	0.597519	Mutant	Ctrl	71887	KH domain-containing protein OS=Dorcoceras hygrometricum OX=472368 GN=F511_00581 PE=4 SV=1	406.853	579.718	553.927	1172.8	665.562	965.466	665.789	252.73	977.055	1172.8	869.023	761.275	1	1	0	1	2	1	x	x		x	x	x
A0A2Z7BCW5_9LAMI	2	1	29.31	0.752469	0.78744	1.029	0.0581281	Mutant	Ctrl	41166	Uncharacterized protein OS=Dorcoceras hygrometricum OX=472368 GN=F511_28894 PE=4 SV=1	1117.17	2049.85	1101.26	1552.21	1502.21	1337.65	1828.18	893.638	1942.48	1552.21	1961.43	1054.74	2	0	1	0	1	1				x	x	x
A0A2Z7BD44_9LAMI	7	1	50.76	0.735185	0.78744	1.03728	0.0593717	Mutant	Ctrl	91575	Protein argonaute 2-like OS=Dorcoceras hygrometricum OX=472368 GN=F511_17306 PE=4 SV=1	86.7732	156.153	155.512	73.951	56.0865	283.255	141.999	68.0756	274.302	73.951	73.232	223.348	0	0	0	0	0	1				x	x	x
A0A2Z7BDC9_9LAMI	7	2	46.17	0.763632	0.78744	1.03137	0.0573785	Mutant	Ctrl	68173	Uncharacterized protein OS=Dorcoceras hygrometricum OX=472368 GN=F511_03645 PE=4 SV=1	571.246	792.058	410.902	672.361	599.954	557.545	934.809	345.3	724.778	672.361	783.358	439.627	1	0	1	2	1	0				x	x	x
A0A2Z7BDG2_9LAMI	10	7	110.14	0.366473	0.680946	1.08786	0.12482	Mutant	Ctrl	49790	Uncharacterized protein OS=Dorcoceras hygrometricum OX=472368 GN=F511_29856 PE=3 SV=1	3350.7	4431.83	3518.07	4069.56	4284.99	3938.97	5483.21	1932.07	6205.41	4069.56	5594.89	3105.9	3	1	4	6	6	1				x	x	x
A0A2Z7BDR3_9LAMI	6	4	37.8	0.124337	0.551503	2.18631	0.320019	Mutant	Ctrl	74840	KH domain-containing protein-like OS=Dorcoceras hygrometricum OX=472368 GN=F511_13509 PE=4 SV=1	18093.6	4872.38	22285	27646.9	41213	30072.6	29609	2124.13	39307.8	27646.9	53811.7	23712.4	0	1	1	2	3	2		x	x	x	x	x
A0A2Z7BDS1_9LAMI	15	4	92.25	0.610419	0.78744	1.08276	0.0717762	Mutant	Ctrl	130613	Sister-chromatid cohesion protein 3 OS=Dorcoceras hygrometricum OX=472368 GN=F511_03663 PE=4 SV=1	8247	13273.6	5955.92	10165	8945.79	10639.8	13495.7	5786.66	10505.5	10165	11680.5	8389.53	2	2	3	3	2	2				x	x	x
A0A2Z7BE26_9LAMI	3	1	64.09	0.104875	0.506344	2.10137	0.360402	Mutant	Ctrl	30842	Uncharacterized protein OS=Dorcoceras hygrometricum OX=472368 GN=F511_00493 PE=4 SV=1	444.758	119.762	230.702	736.012	496.604	438.442	727.818	52.2106	406.929	736.012	648.415	345.714	0	0	0	0	1	0		x	x	x	x	x
A0A2Z7BE43_9LAMI	7	5	36.87	0.870688	0.78744	1.02929	0.0521394	Mutant	Ctrl	20535	Pentatricopeptide repeat-containing protein mitochondrial OS=Dorcoceras hygrometricum OX=472368 GN=F511_24079 PE=4 SV=1	3507.55	6354.72	4000.6	4646.2	3597.36	6025.39	5739.88	2770.36	7056.54	4646.2	4697.06	4751.06	3	2	2	3	3	3				x	x	x
A0A2Z7BEV5_9LAMI	7	3	123.93	0.168828	0.584504	1.34047	0.253673	Mutant	Ctrl	26279	Uncharacterized protein OS=Dorcoceras hygrometricum OX=472368 GN=F511_05099 PE=3 SV=1	3958.24	6589.05	3451.3	6290.38	6511.72	5962.62	6477.41	2872.52	6087.64	6290.38	8502.34	4701.56	2	2	1	0	2	2				x	x	x
A0A2Z7BEZ2_9LAMI	4	2	121.56	0.147713	0.576414	1.12162	0.281624	Mutant	Ctrl	77238	Uncharacterized protein OS=Dorcoceras hygrometricum OX=472368 GN=F511_03289 PE=4 SV=1	902.908	869.304	887.094	928.978	1119.02	934.723	1477.55	378.976	1564.72	928.978	1461.1	737.034	0	0	2	1	1	1				x	x	x
A0A2Z7BFZ2_9LAMI	4	3	281.5	0.222185	0.630946	1.6113	0.201449	Mutant	Ctrl	28092	Carbonic anhydrase OS=Dorcoceras hygrometricum OX=472368 GN=F511_01458 PE=3 SV=1	4168.74	10024	2981.74	12415.7	6756.95	8500.73	6821.88	4370.01	5259.4	12415.7	8822.52	6702.87	5	3	5	4	5	2		x		x	x	x
A0A2Z7BG67_9LAMI	7	4	42.48	0.642102	0.78744	1.10527	0.0679927	Mutant	Ctrl	167543	Uncharacterized protein OS=Dorcoceras hygrometricum OX=472368 GN=F511_03381 PE=4 SV=1	2519.39	3371.42	2529.07	2696.44	2556.64	4053.13	4122.82	1469.78	4460.95	2696.44	3338.2	3195.92	2	1	2	0	0	0				x	x	x
A0A2Z7BH64_9LAMI	6	3	55.75	0.161602	0.584504	1.4135	0.262645	Mutant	Ctrl	60979	Uncharacterized protein OS=Dorcoceras hygrometricum OX=472368 GN=F511_12979 PE=4 SV=1	1457.78	1388.08	1036.02	2443.86	1590.75	1452.44	2385.56	605.141	1827.41	2443.86	2077.04	1145.26	3	0	0	1	0	0				x	x	x
A0A2Z7BHM6_9LAMI	12	7	64.04	0.872782	0.78744	1.0003	0.0520698	Mutant	Ctrl	130668	Uncharacterized protein OS=Dorcoceras hygrometricum OX=472368 GN=F511_01450 PE=4 SV=1	22457.7	39593.2	20029.3	28822.1	22767.1	30516	36750.6	17260.8	35329	28822.1	29726.9	24062	2	3	2	2	5	4				x	x	x
A0A2Z7BHY4_9LAMI	2	2	32.24	0.555682	0.777438	1.14054	0.0795513	Mutant	Ctrl	45430	Heterogeneous nuclear ribonucleoprotein 1-like OS=Dorcoceras hygrometricum OX=472368 GN=F511_02787 PE=4 SV=1	304.529	142.989	375.037	298.534	374.006	265.619	498.342	62.3366	661.516	298.534	488.339	209.442	1	0	2	0	0	0				x	x	x
A0A2Z7BI06_9LAMI	11	1	344.43	0.577838	0.78744	1.26758	0.0761999	Mutant	Ctrl	62701	Uncharacterized protein OS=Dorcoceras hygrometricum OX=472368 GN=F511_04217 PE=3 SV=1	31.962	1.70434	32.0668	9.35778	36.1878	37.7766	52.3039	0.743011	56.5617	9.35778	47.2504	29.7871	0	0	1	0	0	0				x	x	x
A0A2Z7BIA9_9LAMI	5	2	33.03	0.269646	0.649475	1.22913	0.168952	Mutant	Ctrl	27305	Ankyrin-3 OS=Dorcoceras hygrometricum OX=472368 GN=F511_00525 PE=4 SV=1	3830.09	6785.87	4327.08	5953.29	6805.96	5607.73	6267.7	2958.32	7632.4	5953.29	8886.52	4421.73	1	1	0	0	0	0				x	x	x
A0A2Z7BIX1_9LAMI	7	3	41.16	0.712686	0.78744	1.04638	0.0611476	Mutant	Ctrl	49701	Early endosome antigen 1-like OS=Dorcoceras hygrometricum OX=472368 GN=F511_21415 PE=4 SV=1	874.22	1208.22	288.217	1013.22	870.604	596.779	1430.61	526.727	508.377	1013.22	1136.74	470.563	2	0	0	0	1	1				x	x	x
A0A2Z7BIZ6_9LAMI	7	3	48.52	0.669097	0.78744	1.0693	0.0651321	Mutant	Ctrl	47548	Adenine DNA glycosylase OS=Dorcoceras hygrometricum OX=472368 GN=F511_27391 PE=3 SV=1	2066.82	3004.83	1872.03	2393.77	2109.75	2921.34	3382.22	1309.96	3302.02	2393.77	2754.7	2303.49	0	1	0	0	1	2				x	x	x
A0A2Z7BJ29_9LAMI	6	4	127.16	0.493699	0.759147	1.10747	0.0906596	Mutant	Ctrl	34432	Triosephosphate isomerase, chloroplastic OS=Dorcoceras hygrometricum OX=472368 GN=F511_21228 PE=3 SV=1	2515.22	3013.2	2819.43	2908.36	2579.98	3756.67	4115.99	1313.61	4973.11	2908.36	3368.67	2962.16	2	1	1	3	1	2				x	x	x
A0A2Z7BJ66_9LAMI	8	3	123.83	0.724338	0.78744	1.06733	0.0602052	Mutant	Ctrl	43331	Late embryogenesis abundant protein 76-like OS=Dorcoceras hygrometricum OX=472368 GN=F511_05096 PE=4 SV=1	2039.68	2979.98	1665.79	2413.95	1865.38	2856.28	3337.81	1299.13	2938.24	2413.95	2435.62	2252.19	0	0	1	2	0	0				x	x	x
A0A2Z7BJU3_9LAMI	5	4	64.76	0.0016208	0.0803876	3.89516	0.999665	Mutant	Ctrl	47061	Elongation factor Tu OS=Dorcoceras hygrometricum OX=472368 GN=F511_03681 PE=3 SV=1	1328.65	1239.95	1261.17	4028.89	4067.86	6820.84	2174.25	540.563	2224.54	4028.89	5311.4	5378.27	3	0	0	1	1	1	x	x	x	x	x	x
A0A2Z7BKJ9_9LAMI	2	2	18.08	0.246781	0.637738	1.48781	0.183379	Mutant	Ctrl	24159	Uncharacterized protein OS=Dorcoceras hygrometricum OX=472368 GN=F511_03709 PE=4 SV=1	1900.11	5838.77	2058.97	6187	4215.75	4174.62	3109.41	2545.43	3631.76	6187	5504.49	3291.71	0	0	0	0	1	1				x	x	x
A0A2Z7BL12_9LAMI	8	4	44.58	0.522751	0.773211	1.11801	0.0851098	Mutant	Ctrl	61630	Uncharacterized protein OS=Dorcoceras hygrometricum OX=472368 GN=F511_40733 PE=3 SV=1	7651.45	13940.9	9147.39	10687.4	10283.9	13396	12521.1	6077.56	16134.8	10687.4	13427.6	10562.8	1	1	0	1	1	0				x	x	x
A0A2Z7BLJ2_9LAMI	4	2	36.16	0.114507	0.538552	1.11755	0.339266	Mutant	Ctrl	55978	Uncharacterized protein OS=Dorcoceras hygrometricum OX=472368 GN=F511_01499 PE=4 SV=1	1463.3	1433.2	1551.75	1611.93	1542.68	1816.56	2394.6	624.809	2737.08	1611.93	2014.27	1432.36	0	0	2	1	1	1				x	x	x
A0A2Z7BLL5_9LAMI	3	1	70.87	0.0846835	0.462978	1.2307	0.414201	Mutant	Ctrl	38144	Uncharacterized protein OS=Dorcoceras hygrometricum OX=472368 GN=F511_08998 PE=3 SV=1	344.646	436.559	331.456	445.639	490.124	433.593	563.992	190.319	584.645	445.639	639.954	341.891	1	0	1	0	0	0				x	x	x
A0A2Z7BLN3_9LAMI	4	3	33.97	0.690169	0.78744	1.05196	0.0631126	Mutant	Ctrl	106583	Uncharacterized protein OS=Dorcoceras hygrometricum OX=472368 GN=F511_18735 PE=4 SV=1	23754.6	41408.7	18413.4	31152.1	25805.2	30961.8	38873	18052.3	32478.9	31152.1	33693.8	24413.6	4	3	2	2	4	2				x	x	x
A0A2Z7BLQ9_9LAMI	4	1	325.31	0.00636368	0.173593	1.32612	0.967999	Mutant	Ctrl	28116	Photosystem II 22 kDa protein, chloroplastic OS=Dorcoceras hygrometricum OX=472368 GN=F511_03294 PE=4 SV=1	698.264	637.94	661.644	823.758	861.583	964.054	1142.67	278.112	1167.05	823.758	1124.97	760.162	1	1	1	2	1	2	x			x	x	x
A0A2Z7BLT7_9LAMI	11	8	251.65	0.766435	0.78744	1.02688	0.0571967	Mutant	Ctrl	100715	Uncharacterized protein OS=Dorcoceras hygrometricum OX=472368 GN=F511_01437 PE=4 SV=1	4058.12	6361.87	4485.24	5022.02	4855.43	5428.49	6640.85	2773.48	7911.38	5022.02	6339.72	4280.4	7	5	3	6	7	4				x	x	x
A0A2Z7BLY7_9LAMI	3	1	26.61	0.043876	0.42658	2.1277	0.593219	Mutant	Ctrl	70537	Uncharacterized protein OS=Dorcoceras hygrometricum OX=472368 GN=F511_15117 PE=4 SV=1	326.464	528.133	220.291	848.008	598.919	840.113	534.238	230.242	388.565	848.008	782.007	662.434	1	1	1	2	1	2	x	x	x	x	x	x
A0A2Z7BM91_9LAMI	13	7	65.95	0.663503	0.78744	1.05938	0.065699	Mutant	Ctrl	85392	Uncharacterized protein OS=Dorcoceras hygrometricum OX=472368 GN=F511_14709 PE=4 SV=1	5450.39	8180.6	5718.33	6605.9	6084.58	7807.77	8919.23	3566.36	10086.4	6605.9	7944.61	6156.47	2	1	0	1	3	4				x	x	x
A0A2Z7BNH4_9LAMI;A0A2Z7BKX6_9LAMI	23	1	705.26	0.096093	0.485424	1.30827	0.382017	Mutant	Ctrl	49811	Elongation factor 1-alpha OS=Dorcoceras hygrometricum OX=472368 GN=F511_06854 PE=3 SV=1	519.146	674.39	567.074	749.696	903.692	649.969	849.55	294.003	1000.25	749.696	1179.95	512.504	1	0	0	1	1	1				x	x	x
A0A2Z7BNW5_9LAMI	2	1	36.41	0.843967	0.78744	1.06667	0.053134	Mutant	Ctrl	43450	Uncharacterized protein OS=Dorcoceras hygrometricum OX=472368 GN=F511_31577 PE=4 SV=1	21899.3	31482.7	8704.44	29315	26225.5	10685.3	35836.8	13725	15353.5	29315	34242.5	8425.43	0	0	0	1	0	1				x	x	x
A0A2Z7BP10_9LAMI	4	1	113.11	5.71065e-05	0.0242419	3.65985	1	Mutant	Ctrl	31821	Superoxide dismutase OS=Dorcoceras hygrometricum OX=472368 GN=F511_30311 PE=4 SV=1	501.305	630.218	536.65	2075.64	1931.34	2098.28	820.354	274.746	946.581	2075.64	2521.74	1654.51	0	0	0	0	0	1	x	x	x	x	x	x
A0A2Z7BP69_9LAMI	9	3	285.1	0.0148509	0.270075	1.7505	0.859387	Mutant	Ctrl	32954	Glucose and ribitol dehydrogenase1 OS=Dorcoceras hygrometricum OX=472368 GN=F511_26099 PE=4 SV=1	1926.17	2846.09	1822.8	3891.93	3942.79	3709.96	3152.05	1240.76	3215.18	3891.93	5148.08	2925.32	2	2	1	4	4	3	x	x		x	x	x
A0A2Z7BPH8_9LAMI	4	2	33.57	0.0336441	0.417167	1.66926	0.666229	Mutant	Ctrl	95837	Putative helicase MAGATAMA 3-like OS=Dorcoceras hygrometricum OX=472368 GN=F511_14282 PE=4 SV=1	379.235	253.867	379.044	463.743	592.116	633.676	620.595	110.674	668.584	463.743	773.124	499.657	0	0	1	1	0	0	x	x		x	x	x
A0A2Z7BPN8_9LAMI	5	3	66.2	0.231299	0.637738	1.39056	0.194405	Mutant	Ctrl	30411	Uncharacterized protein OS=Dorcoceras hygrometricum OX=472368 GN=F511_04156 PE=3 SV=1	374.685	180.328	331.427	350.533	514.84	367.276	613.148	78.6147	584.595	350.533	672.225	289.599	2	0	1	1	1	2				x	x	x
A0A2Z7BPP9_9LAMI	3	2	56.1	0.622763	0.78744	1.12573	0.0702445	Mutant	Ctrl	34046	Peroxidase 1 OS=Dorcoceras hygrometricum OX=472368 GN=F511_29135 PE=4 SV=1	16109	81655.5	12504.3	29673.2	23001.4	71458.1	26361.4	35598	22056	29673.2	30032.8	56345.1	3	1	3	4	3	2				x	x	x
A0A2Z7BQ35_9LAMI	7	1	32.83	0.330026	0.660247	1.21801	0.138872	Mutant	Ctrl	112805	Uncharacterized protein OS=Dorcoceras hygrometricum OX=472368 GN=F511_36765 PE=3 SV=1	706.979	984.626	548.245	997.51	740.884	989.772	1156.93	429.251	967.032	997.51	967.371	780.441	0	0	1	0	0	0				x	x	x
A0A2Z7BQ78_9LAMI	3	1	33.15	0.648571	0.78744	1.07055	0.067278	Mutant	Ctrl	22029	Uncharacterized protein OS=Dorcoceras hygrometricum OX=472368 GN=F511_43281 PE=4 SV=1	1349.18	2476.06	1278.25	1896.54	1569.25	1997.74	2207.85	1079.45	2254.66	1896.54	2048.97	1575.23	1	2	2	1	1	2				x	x	x
A0A2Z7BQE1_9LAMI;A0A2Z7D1P3_9LAMI	3	3	113.3	0.433953	0.713485	1.18669	0.10438	Mutant	Ctrl	15426	Glycine-rich RNA-binding protein OS=Dorcoceras hygrometricum OX=472368 GN=F511_42560 PE=4 SV=1	1224.54	2011.7	1742.21	1707.05	1672.89	2527.91	2003.88	877.009	3073.03	1707.05	2184.29	1993.27	3	1	2	3	2	3				x	x	x
A0A2Z7BR96_9LAMI	24	14	135.18	0.186482	0.602009	1.31367	0.233938	Mutant	Ctrl	420983	Uncharacterized protein OS=Dorcoceras hygrometricum OX=472368 GN=F511_27329 PE=3 SV=1	8864.75	11930.3	10947.9	13431	10816.5	17452.3	14506.6	5201.06	19310.7	13431	14123.1	13761.2	4	2	4	7	3	4				x	x	x
A0A2Z7BRM9_9LAMI	7	6	57.92	0.827189	0.78744	1.03307	0.0538613	Mutant	Ctrl	26077	Plastid ribosomal protein l11 OS=Dorcoceras hygrometricum OX=472368 GN=F511_14686 PE=3 SV=1	5712.75	8531.85	4568.18	6927.43	7514.56	4993.01	9348.56	3719.49	8057.68	6927.43	9811.74	3937.01	3	1	1	3	1	1				x	x	x
A0A2Z7BS67_9LAMI	4	2	41.98	0.995958	0.812869	1.01867	0.0500021	Mutant	Ctrl	54913	Uncharacterized protein OS=Dorcoceras hygrometricum OX=472368 GN=F511_14663 PE=4 SV=1	11967.8	13218.8	7999.99	11361.6	15097	7347.56	19584.5	5762.79	14110.9	11361.6	19712.2	5793.59	1	0	1	0	1	1				x	x	x
A0A2Z7BSA1_9LAMI	23	1	700.42	0.361414	0.680946	1.24978	0.126624	Mutant	Ctrl	49797	Elongation factor 1-alpha OS=Dorcoceras hygrometricum OX=472368 GN=F511_06853 PE=3 SV=1	320.407	260.953	357.114	384.011	509.163	279.711	524.326	113.763	629.903	384.011	664.813	220.553	2	0	1	1	1	1				x	x	x
A0A2Z7BTS3_9LAMI	8	3	119.46	0.0638853	0.438004	1.29229	0.489252	Mutant	Ctrl	69252	Heat shock 70 kDa protein, mitochondrial OS=Dorcoceras hygrometricum OX=472368 GN=F511_13296 PE=3 SV=1	514.245	670.467	509.466	791.619	665.018	732.731	841.53	292.292	898.631	791.619	868.312	577.763	1	1	1	2	1	2				x	x	x
A0A2Z7BTW3_9LAMI	3	2	30.39	0.33357	0.661771	1.75577	0.137391	Mutant	Ctrl	35419	Uncharacterized protein OS=Dorcoceras hygrometricum OX=472368 GN=F511_24661 PE=4 SV=1	50.9851	90.8983	54.6744	61.0303	78.625	205.456	83.4339	39.6274	96.4385	61.0303	102.66	162.003	0	0	0	0	1	1		x		x	x	x
A0A2Z7BW64_9LAMI	6	1	32.82	0.881911	0.78744	1.0154	0.0517802	Mutant	Ctrl	142896	Leucine-rich repeat receptor protein kinase EXS OS=Dorcoceras hygrometricum OX=472368 GN=F511_15992 PE=3 SV=1	57.0064	31.8202	73.952	38.9412	67.6162	58.7282	93.2874	13.8721	130.442	38.9412	88.2862	46.3075	0	0	0	0	1	0				x	x	x
A0A2Z7BXI0_9LAMI;A0A2Z7D1K0_9LAMI	19	14	744.71	0.779415	0.78744	1.02561	0.056388	Mutant	Ctrl	54354	V-type proton ATPase subunit B 2 OS=Dorcoceras hygrometricum OX=472368 GN=F511_17534 PE=3 SV=1	6096.98	7148.38	7170.84	6163.5	7243.78	7531.71	9977.32	3116.36	12648.4	6163.5	9458.19	5938.8	15	6	19	11	12	9				x	x	x
A0A2Z7BYE0_9LAMI	10	10	300.91	0.00260589	0.10155	1.58302	0.997559	Mutant	Ctrl	53997	Dihydrolipoyl dehydrogenase OS=Dorcoceras hygrometricum OX=472368 GN=F511_24289 PE=3 SV=1	3455.97	3787.67	4215.9	6050.87	5645.23	6444.61	5655.47	1651.25	7436.29	6050.87	7370.96	5081.61	8	3	4	9	11	6	x	x		x	x	x
A0A2Z7BZ97_9LAMI	6	6	101.21	0.0278649	0.409595	1.51045	0.716194	Mutant	Ctrl	46152	Proteasome subunit beta type-5 OS=Dorcoceras hygrometricum OX=472368 GN=F511_15644 PE=4 SV=1	3764.87	4066.35	4052.71	5299.73	5216.56	7433.8	6160.97	1772.74	7148.45	5299.73	6811.25	5861.59	5	3	5	3	4	2	x	x		x	x	x
A0A2Z7BZC2_9LAMI	4	2	292.94	0.308013	0.654563	1.33653	0.148708	Mutant	Ctrl	31284	Chlorophyll a-b binding protein, chloroplastic OS=Dorcoceras hygrometricum OX=472368 GN=F511_02079 PE=3 SV=1	1707.72	4906.12	2410.27	3807.43	3456.48	4797.13	2794.58	2138.84	4251.41	3807.43	4513.11	3782.57	2	0	2	1	3	2				x	x	x
A0A2Z7BZF9_9LAMI	6	4	39.18	0.731447	0.78744	1.03051	0.0596542	Mutant	Ctrl	26762	Uncharacterized protein OS=Dorcoceras hygrometricum OX=472368 GN=F511_39025 PE=4 SV=1	1495.78	1959.62	1365.94	1703.9	1562.63	1701.92	2447.75	854.304	2409.34	1703.9	2040.33	1341.97	1	1	0	1	1	0				x	x	x
A0A2Z7BZT7_9LAMI	3	3	79.12	0.397289	0.695763	1.17018	0.114711	Mutant	Ctrl	34510	Uncharacterized protein OS=Dorcoceras hygrometricum OX=472368 GN=F511_31149 PE=4 SV=1	952.124	1418.09	703.344	1305.64	1148.42	1142.55	1558.09	618.222	1240.61	1305.64	1499.49	900.911	1	1	1	3	2	1				x	x	x
A0A2Z7C0I0_9LAMI	4	2	210.83	0.711407	0.78744	1.04749	0.0612541	Mutant	Ctrl	24851	Proteasome subunit beta OS=Dorcoceras hygrometricum OX=472368 GN=F511_41772 PE=3 SV=1	859.712	973.423	550.081	911.805	825.699	758.894	1406.86	424.367	970.271	911.805	1078.11	598.392	3	2	1	4	2	1				x	x	x
A0A2Z7C0M6_9LAMI	9	1	60.62	0.302224	0.654563	1.37309	0.151491	Mutant	Ctrl	137085	Uncharacterized protein OS=Dorcoceras hygrometricum OX=472368 GN=F511_27600 PE=4 SV=1	126.705	99.1153	228.726	182.283	162.431	279.421	207.345	43.2097	403.443	182.283	212.085	220.325	0	0	1	1	0	1				x	x	x
A0A2Z7C0Y7_9LAMI	2	1	28.44	0.865255	0.78744	1.60493	0.0523256	Mutant	Ctrl	59321	T-complex protein 1 subunit zeta-like OS=Dorcoceras hygrometricum OX=472368 GN=F511_29372 PE=3 SV=1	7.47127	279.127	47.727	144.632	0	391.937	12.2263	121.686	84.1843	144.632	0	309.044	0	0	0	0	0	1		x		x	x	x
A0A2Z7C1N8_9LAMI	12	7	817.6	0.203658	0.617797	1.33534	0.217232	Mutant	Ctrl	28408	Chlorophyll a-b binding protein, chloroplastic OS=Dorcoceras hygrometricum OX=472368 GN=F511_22923 PE=3 SV=1	85931	166012	86121	155025	138518	157887	140621	72373.5	151906	155025	180862	124495	13	4	14	4	11	9				x	x	x
A0A2Z7C1W4_9LAMI;A0A2Z7BGD1_9LAMI	7	3	67.51	0.505185	0.767731	1.27931	0.0883875	Mutant	Ctrl	27133	Proteasome subunit alpha type OS=Dorcoceras hygrometricum OX=472368 GN=F511_05139 PE=3 SV=1	19589.8	30655.8	12059.5	34357.3	29656.2	15694	32057.4	13364.5	21271.4	34357.3	38722.1	12374.8	2	0	0	2	2	1				x	x	x
A0A2Z7C4T9_9LAMI	5	1	166.82	0.141938	0.57361	1.53753	0.290282	Mutant	Ctrl	28660	40S ribosomal protein S6 OS=Dorcoceras hygrometricum OX=472368 GN=F511_35515 PE=3 SV=1	307.588	350.573	165.414	516.624	387.763	361.889	503.349	152.834	291.769	516.624	506.301	285.351	1	0	0	0	1	1		x		x	x	x
A0A2Z7C4V7_9LAMI	6	3	93.14	0.000418763	0.0456932	4.53742	1	Mutant	Ctrl	55406	UTP--glucose-1-phosphate uridylyltransferase OS=Dorcoceras hygrometricum OX=472368 GN=F511_22149 PE=3 SV=1	747.035	526.361	738.938	2876.59	2710.7	3543.51	1222.48	229.469	1303.39	2876.59	3539.36	2794.07	2	1	1	1	1	1	x	x	x	x	x	x
A0A2Z7C5A4_9LAMI	5	3	50.15	0.548517	0.777438	1.186	0.0806997	Mutant	Ctrl	48971	Aspartate aminotransferase OS=Dorcoceras hygrometricum OX=472368 GN=F511_14316 PE=4 SV=1	1865.78	2618.54	2797.31	2392.03	2210.23	4033.72	3053.23	1141.56	4934.1	2392.03	2885.9	3180.61	3	0	2	3	4	3				x	x	x
A0A2Z7C5T3_9LAMI	10	2	96.82	0.6401	0.78744	1.11469	0.0682177	Mutant	Ctrl	76989	Aminomethyltransferase, mitochondrial OS=Dorcoceras hygrometricum OX=472368 GN=F511_22744 PE=4 SV=1	1518.85	2635.46	1198.76	1814.52	1551.71	2600.79	2485.5	1148.94	2114.46	1814.52	2026.07	2050.74	1	0	1	1	1	0				x	x	x
A0A2Z7C5U0_9LAMI	3	1	23.59	0.269257	0.649475	1.72784	0.169182	Mutant	Ctrl	17652	High mobility group B protein 1-like OS=Dorcoceras hygrometricum OX=472368 GN=F511_02078 PE=4 SV=1	257.055	391.274	79.3133	358.371	278.437	620.444	420.654	170.577	139.898	358.371	363.554	489.224	0	0	0	0	1	0		x		x	x	x
A0A2Z7C6M9_9LAMI	18	11	724.21	0.329314	0.660247	1.11944	0.139173	Mutant	Ctrl	62656	RuBisCO large subunit-binding protein subunit alpha OS=Dorcoceras hygrometricum OX=472368 GN=F511_22742 PE=3 SV=1	9271.02	13267.3	9699.97	12059.1	12266.5	11763.3	15171.4	5783.93	17109.5	12059.1	16016.4	9275.46	13	8	15	10	14	10				x	x	x
A0A2Z7C7P2_9LAMI	2	1	30.72	0.0319812	0.409595	1.8077	0.679871	Mutant	Ctrl	24267	Uncharacterized protein OS=Dorcoceras hygrometricum OX=472368 GN=F511_40145 PE=4 SV=1	304.978	410.97	371.588	628.931	493.311	843.695	499.078	179.164	655.432	628.931	644.115	665.259	0	0	0	0	1	0	x	x		x	x	x
A0A2Z7C8C1_9LAMI	5	1	67.43	0.0844977	0.462978	2.72281	0.41477	Mutant	Ctrl	21003	Polyubiquitin-like (Fragment) OS=Dorcoceras hygrometricum OX=472368 GN=F511_04498 PE=3 SV=1	67.2963	42.8277	71.7417	127.754	83.8724	283.56	110.126	18.6709	126.543	127.754	109.512	223.588	0	0	0	1	0	1		x	x	x	x	x
A0A2Z7C8H5_9LAMI	2	1	95.25	0.171084	0.584504	2.45849	0.250985	Mutant	Ctrl	24863	Uncharacterized protein OS=Dorcoceras hygrometricum OX=472368 GN=F511_25695 PE=4 SV=1	131.003	181.985	15.3995	307.6	204.158	295.577	214.378	79.3369	27.1627	307.6	266.569	233.064	2	0	0	1	1	1		x	x	x	x	x
A0A2Z7C9N1_9LAMI	12	2	271.69	0.653626	0.78744	1.05519	0.0667326	Mutant	Ctrl	68737	V-type proton ATPase catalytic subunit A-like OS=Dorcoceras hygrometricum OX=472368 GN=F511_09895 PE=3 SV=1	8052.43	11660	7022.47	9268.3	8833.75	10108.4	13177.3	5083.23	12386.7	9268.3	11534.2	7970.5	0	0	2	1	1	0				x	x	x
A0A2Z7C055_9LAMI	2	1	17.69	0.561889	0.77805	1.0491	0.0785826	Mutant	Ctrl	28421	tRNA-splicing endonuclease subunit Sen2-1-like OS=Dorcoceras hygrometricum OX=472368 GN=F511_12439 PE=4 SV=1	621.93	720.785	542.502	689.997	635.133	652.652	1017.75	314.229	956.902	689.997	829.292	514.62	0	0	0	0	0	1				x	x	x
A0A2Z7C158_9LAMI	3	2	33.68	0.0995797	0.498422	2.30639	0.37314	Mutant	Ctrl	18646	Outer envelope pore protein 16-2, chloroplastic OS=Dorcoceras hygrometricum OX=472368 GN=F511_23420 PE=4 SV=1	210.299	56.1913	182.741	435.201	350.661	250.242	344.141	24.4968	322.332	435.201	457.857	197.317	1	0	1	1	2	0		x	x	x	x	x
A0A2Z7C226_9LAMI	5	3	55.76	0.420026	0.705093	1.26683	0.10811	Mutant	Ctrl	68583	Threonylcarbamoyladenosine tRNA methylthiotransferase-like OS=Dorcoceras hygrometricum OX=472368 GN=F511_05127 PE=4 SV=1	1399.04	2045.94	829.299	2269.72	1845.05	1300.02	2289.44	891.933	1462.78	2269.72	2409.07	1025.07	2	2	1	2	1	2				x	x	x
A0A2Z7C485_9LAMI	4	3	74.6	0.929378	0.802006	1.40308	0.0506322	Mutant	Ctrl	40356	Glycerate dehydrogenase OS=Dorcoceras hygrometricum OX=472368 GN=F511_17529 PE=3 SV=1	480.57	384.602	1110.12	307.438	390.311	2073.75	786.423	167.669	1958.12	307.438	509.628	1635.17	2	1	2	1	2	2				x	x	x
A0A2Z7C518_9LAMI	5	4	54.08	0.16862	0.584504	1.37304	0.253923	Mutant	Ctrl	22671	Thioredoxin family protein OS=Dorcoceras hygrometricum OX=472368 GN=F511_14320 PE=4 SV=1	1439.45	1814.59	937.341	2012.23	1648.73	2093.98	2355.56	791.075	1653.35	2012.23	2152.74	1651.11	1	0	1	1	3	1				x	x	x
A0A2Z7C542_9LAMI	3	1	31.27	0.0356171	0.425923	2.46395	0.650749	Mutant	Ctrl	29424	Cytoplasmic dynein heavy chain OS=Dorcoceras hygrometricum OX=472368 GN=F511_43218 PE=4 SV=1	81.2928	98.762	76.2655	192.316	127.468	311.777	133.031	43.0556	134.522	192.316	166.434	245.838	0	0	0	0	1	0	x	x	x	x	x	x
A0A2Z7C775_9LAMI	4	2	34.95	0.59376	0.78744	1.11284	0.0739666	Mutant	Ctrl	30473	Uncharacterized protein OS=Dorcoceras hygrometricum OX=472368 GN=F511_15893 PE=4 SV=1	939.053	2030.56	809.542	1126.45	1375.94	1703.21	1536.7	885.23	1427.93	1126.45	1796.56	1342.99	2	2	1	0	1	2				x	x	x
A0A2Z7C899_9LAMI	2	1	47.24	0.00149895	0.0803876	3.53247	0.999771	Mutant	Ctrl	14227	Serine/threonine-protein kinase sepA-like OS=Dorcoceras hygrometricum OX=472368 GN=F511_43135 PE=4 SV=1	514.928	485	737.81	1741.05	1959.12	2438.34	842.647	211.438	1301.4	1741.05	2558.02	1922.64	0	1	0	2	2	2	x	x	x	x	x	x
A0A2Z7CAV7_9LAMI;A0A2Z7D6X5_9LAMI	9	2	195.83	0.466096	0.742452	1.27359	0.0965759	Mutant	Ctrl	23877	Uncharacterized protein OS=Dorcoceras hygrometricum OX=472368 GN=F511_26411 PE=4 SV=1	548.119	744.984	211.839	871.213	486.457	559.005	896.962	324.779	373.657	871.213	635.166	440.779	0	0	0	2	0	0				x	x	x
A0A2Z7CBR6_9LAMI	6	3	196.84	0.00605315	0.173593	1.39303	0.971401	Mutant	Ctrl	41938	Uncharacterized protein (Fragment) OS=Dorcoceras hygrometricum OX=472368 GN=F511_41955 PE=4 SV=1	1595.72	1762.49	1843.19	2343.43	2634.87	2267.4	2611.29	768.365	3251.15	2343.43	3440.34	1787.86	2	2	3	4	5	3	x			x	x	x
A0A2Z7CCH8_9LAMI;A0A2Z7AM97_9LAMI	8	5	129.74	0.42288	0.705541	1.09075	0.107327	Mutant	Ctrl	48254	Proteasome endopeptidase complex OS=Dorcoceras hygrometricum OX=472368 GN=F511_35391 PE=3 SV=1	1555.32	2047.88	1425.57	1879.75	1765.28	1840.09	2545.18	892.781	2514.51	1879.75	2304.93	1450.92	3	0	3	0	2	0				x	x	x
A0A2Z7CDK2_9LAMI	3	1	29.97	0.190282	0.603439	1.31311	0.230048	Mutant	Ctrl	37092	Uncharacterized protein OS=Dorcoceras hygrometricum OX=472368 GN=F511_37806 PE=4 SV=1	97.5933	142.121	83.5693	168.82	130.786	124.901	159.705	61.9581	147.405	168.82	170.766	98.4853	0	0	0	1	0	0				x	x	x
A0A2Z7CDR4_9LAMI	3	1	32.19	0.34767	0.675017	1.19674	0.131754	Mutant	Ctrl	48083	Thioredoxin family protein OS=Dorcoceras hygrometricum OX=472368 GN=F511_09866 PE=3 SV=1	143.709	78.2074	140.407	141.399	154.775	137.435	235.172	34.0948	247.66	141.399	202.089	108.369	1	0	1	1	0	1				x	x	x
A0A2Z7CDW7_9LAMI	7	3	70.2	0.572824	0.78522	1.05309	0.0769328	Mutant	Ctrl	69755	Exocyst subunit Exo70 family protein OS=Dorcoceras hygrometricum OX=472368 GN=F511_10028 PE=3 SV=1	526.174	431.985	542.388	513.275	579.812	487.116	861.05	188.325	956.701	513.275	757.059	384.094	0	0	2	0	1	0				x	x	x
A0A2Z7CE24_9LAMI	4	2	44.89	0.33916	0.663214	1.19665	0.135108	Mutant	Ctrl	39471	Hydroxyacylglutathione hydrolase cytoplasmic OS=Dorcoceras hygrometricum OX=472368 GN=F511_33215 PE=3 SV=1	1364.85	2119.25	1235.31	1845.26	1629.92	2172.32	2233.5	923.896	2178.92	1845.26	2128.18	1712.89	1	0	2	2	1	1				x	x	x
A0A2Z7CE66_9LAMI	3	1	19.78	0.725023	0.78744	1.04227	0.0601513	Mutant	Ctrl	17306	Uncharacterized protein OS=Dorcoceras hygrometricum OX=472368 GN=F511_04089 PE=4 SV=1	420.232	652.095	379.545	446.69	525.712	540.837	687.684	284.283	669.467	446.69	686.421	426.453	0	0	0	1	0	0				x	x	x
A0A2Z7CF78_9LAMI	8	4	47.24	0.408619	0.698981	1.14109	0.111338	Mutant	Ctrl	114226	Polyribonucleotide nucleotidyltransferase 2, mitochondrial OS=Dorcoceras hygrometricum OX=472368 GN=F511_02342 PE=4 SV=1	1941.64	2714.85	1730.78	2689.48	2067.23	2531.76	3177.38	1183.55	3052.87	2689.48	2699.17	1996.31	1	1	1	2	0	2				x	x	x
A0A2Z7CF80_9LAMI;A0A2Z7B1P5_9LAMI	5	3	137.86	0.848735	0.78744	1.00491	0.0529419	Mutant	Ctrl	19844	Ribosomal protein large subunit 16A OS=Dorcoceras hygrometricum OX=472368 GN=F511_07968 PE=3 SV=1	4446.3	7296.24	3785.19	5797.58	4751.66	5054.74	7276.09	3180.82	6676.58	5797.58	6204.23	3985.7	2	1	2	2	3	2				x	x	x
A0A2Z7CFH1_9LAMI	5	4	40.91	0.525509	0.773211	1.12832	0.0846157	Mutant	Ctrl	46999	Basic 7S globulin OS=Dorcoceras hygrometricum OX=472368 GN=F511_04480 PE=3 SV=1	1227.03	1860.09	787.274	1506.54	1289.38	1575.65	2007.96	810.912	1388.65	1506.54	1683.55	1242.41	1	1	0	2	2	2				x	x	x
A0A2Z7CFT7_9LAMI	6	2	137.77	0.73638	0.78744	1.15127	0.0592824	Mutant	Ctrl	66580	Polyphenol oxidase, chloroplastic-like OS=Dorcoceras hygrometricum OX=472368 GN=F511_35548 PE=4 SV=1	15612.6	9493.93	20993.8	10382.6	25618.8	17072.4	25549	4138.91	37030.3	10382.6	33450.3	13461.7	0	0	1	0	1	0				x	x	x
A0A2Z7CG21_9LAMI	7	5	37.46	0.0639933	0.438004	1.26407	0.488792	Mutant	Ctrl	49121	Uncharacterized protein OS=Dorcoceras hygrometricum OX=472368 GN=F511_02315 PE=4 SV=1	417.06	452.185	412.31	578.401	452.525	589.052	682.493	197.132	727.26	578.401	590.861	464.471	4	0	1	0	2	1				x	x	x
A0A2Z7CGQ1_9LAMI;R9X1T2_9LAMI	14	1	170.51	0.87097	0.78744	1.0106	0.05213	Mutant	Ctrl	101371	Uncharacterized protein OS=Dorcoceras hygrometricum OX=472368 GN=F511_24765 PE=3 SV=1	985.295	1426.22	1086.28	1123.79	1119.35	1291.72	1612.37	621.765	1916.05	1123.79	1461.53	1018.53	0	1	0	0	0	0				x	x	x
A0A2Z7CHH3_9LAMI	6	4	142.15	0.0639634	0.438004	1.30825	0.488919	Mutant	Ctrl	44317	V-type proton ATPase subunit C OS=Dorcoceras hygrometricum OX=472368 GN=F511_10587 PE=3 SV=1	1240.03	1757.44	1362.75	1908.31	1785.34	2010.62	2029.22	766.163	2403.71	1908.31	2331.12	1585.38	2	0	2	1	3	1				x	x	x
A0A2Z7CHK2_9LAMI	11	6	136.47	0.588747	0.78744	1.06639	0.0746547	Mutant	Ctrl	42344	UDP-arabinopyranose mutase 1 OS=Dorcoceras hygrometricum OX=472368 GN=F511_10595 PE=4 SV=1	3309.34	3959.81	3205.44	4000.36	4034.71	3134.88	5415.52	1726.29	5653.98	4000.36	5268.1	2471.87	3	2	4	3	4	2				x	x	x
A0A2Z7CIX4_9LAMI	2	2	93.66	0.83796	0.78744	1.0048	0.0533851	Mutant	Ctrl	20369	40S ribosomal protein S8 OS=Dorcoceras hygrometricum OX=472368 GN=F511_23726 PE=3 SV=1	426.559	450.933	448.985	432.979	453.873	445.991	698.036	196.586	791.951	432.979	592.62	351.667	1	0	1	1	2	1				x	x	x
A0A2Z7CJD9_9LAMI	2	2	22.46	0.179568	0.590141	1.46515	0.241326	Mutant	Ctrl	59899	Outer envelope pore protein 16-3, chloroplastic/mitochondrial-like OS=Dorcoceras hygrometricum OX=472368 GN=F511_28378 PE=4 SV=1	2012.47	1478.55	1353.88	2424.87	3064.1	1609.55	3293.29	644.58	2388.07	2424.87	4000.78	1269.14	2	0	3	1	1	0				x	x	x
A0A2Z7CJS9_9LAMI	6	2	100.62	0.884417	0.78744	1.10497	0.0517047	Mutant	Ctrl	45443	Calreticulin-like OS=Dorcoceras hygrometricum OX=472368 GN=F511_07755 PE=3 SV=1	400.686	355.778	343.267	482.704	505.865	226.597	655.698	155.103	605.478	482.704	660.506	178.673	0	1	1	0	3	1				x	x	x
A0A2Z7CKU1_9LAMI	3	2	85.63	0.366611	0.680946	1.11043	0.124772	Mutant	Ctrl	35955	Mov34/MPN/PAD-1 family protein OS=Dorcoceras hygrometricum OX=472368 GN=F511_11794 PE=4 SV=1	369.257	512.065	362.265	440.261	459.758	480.901	604.265	223.237	638.988	440.261	600.304	379.194	2	1	3	1	3	2				x	x	x
A0A2Z7CLE6_9LAMI	4	1	79.65	0.234258	0.637738	1.50409	0.192211	Mutant	Ctrl	36095	Ethylene-forming enzyme OS=Dorcoceras hygrometricum OX=472368 GN=F511_31932 PE=3 SV=1	79.9739	131.346	53.7127	125.888	94.956	177.789	130.872	57.2608	94.7422	125.888	123.984	140.188	0	0	1	0	0	0		x		x	x	x
A0A2Z7CLU2_9LAMI	3	2	174.09	0.967112	0.810492	1.01864	0.0501367	Mutant	Ctrl	42569	Formate dehydrogenase, mitochondrial OS=Dorcoceras hygrometricum OX=472368 GN=F511_02329 PE=3 SV=1	1799.78	1144.2	1153.9	1487.47	1739.45	947.335	2945.23	498.82	2035.33	1487.47	2271.2	746.979	2	0	2	0	2	0				x	x	x
A0A2Z7CLX0_9LAMI;A0A2Z7BY55_9LAMI;A0A2Z7BK86_9LAMI	4	2	136.42	0.35304	0.679082	1.19677	0.129709	Mutant	Ctrl	22701	Uncharacterized protein OS=Dorcoceras hygrometricum OX=472368 GN=F511_36365 PE=4 SV=1	1011.83	656.632	1116.53	1030.98	1319.71	982.32	1655.8	286.261	1969.42	1030.98	1723.14	774.565	2	0	1	1	2	0				x	x	x
A0A2Z7CMB0_9LAMI;A0A2Z7AXR5_9LAMI	4	2	65.08	0.249248	0.637738	1.14302	0.181723	Mutant	Ctrl	24173	Ras-related protein Rab11C OS=Dorcoceras hygrometricum OX=472368 GN=F511_33930 PE=4 SV=1	1614.72	2197.62	1600.06	2095.14	1963.94	2127.4	2642.38	958.061	2822.29	2095.14	2564.32	1677.47	3	3	1	3	2	2				x	x	x
A0A2Z7CMT4_9LAMI	10	8	158.47	0.292236	0.654563	1.17369	0.156506	Mutant	Ctrl	36830	Uncharacterized protein OS=Dorcoceras hygrometricum OX=472368 GN=F511_14451 PE=4 SV=1	3279.65	4696.23	3039.62	4775.07	3968.35	4185.4	5366.94	2047.34	5361.49	4775.07	5181.46	3300.21	2	4	1	2	0	3				x	x	x
A0A2Z7CN30_9LAMI	11	4	246.61	0.864606	0.78744	1.05161	0.0523484	Mutant	Ctrl	80255	Transketolase, chloroplastic OS=Dorcoceras hygrometricum OX=472368 GN=F511_15196 PE=4 SV=1	1757.28	1751.09	2565.3	1957.71	1596.12	2833.3	2875.67	763.393	4524.86	1957.71	2084.05	2234.07	2	1	3	2	1	1				x	x	x
A0A2Z7CNK7_9LAMI	9	2	204.69	0.431542	0.713485	1.15569	0.10501	Mutant	Ctrl	57481	Serine hydroxymethyltransferase OS=Dorcoceras hygrometricum OX=472368 GN=F511_16015 PE=3 SV=1	2014.39	3264.56	1643.07	2915.21	2406.08	2678.44	3296.42	1423.2	2898.17	2915.21	3141.62	2111.96	1	0	1	0	0	0				x	x	x
A0A2Z7CNM9_9LAMI	9	3	45.59	0.191736	0.603439	1.36455	0.228591	Mutant	Ctrl	45041	Uncharacterized protein OS=Dorcoceras hygrometricum OX=472368 GN=F511_41329 PE=4 SV=1	6928.38	4872.04	9621.49	9874.21	11200.6	8156.44	11337.9	2123.99	16971.1	9874.21	14624.6	6431.4	1	0	0	1	1	0				x	x	x
[truncated: 70 more rows]
